# Supplementary material for: An ecological transcriptome approach to capture the molecular and physiological mechanisms of mass flowering in Shorea curtisii
Source: PeerJ. 2023 Nov 29;11:e16368. doi: 10.7717/peerj.16368 (PMC10693236; doi:10.7717/peerj.16368)
Supplement: Supplemental Information 10 [file peerj-11-16368-s010.xlsx]

## Sheet: S1
Table S1. Details of sampling time and corresponding developmental stage and meteorological data. Records of daily minimum (min.) temperature, maximum (max.) temperature, and mean temperature was obtained from Hospital Kuala Kubu Bharu meteorological station. Records of daily precipitation (rainfall) was collected at Kampung Pertak hydrological station. The developmental stage is categorized base…
Time Point	Date	Developmental Stage	Daily Min. Temperature (℃)	Daily Max. Temperature (℃)	Daily Mean Temperature (℃)	Daily Rainfall (mm)	Sampling Time - C1	Sampling Time - C2	Remark
TP-A	2013-07-08	Vegetative	21.3	32.6	25.9	9.5	12:50:00	11:40:00
TP-B	2013-10-17	Vegetative	22.1	36.8	27.2	4	13:20:00	11:10:00
TP-C	2013-12-18	Vegetative	22.7	34.8	28	3.7	11:10:00	12:10:00	Leaf data was obtained from Suhaimi et al. (2023). The data can be found in the same BioProject Accession PRJNA768952.
TP-D	2014-02-14	Vegetative	25.6	36.1	29.2	0	11:20:00	13:00:00
TP-E	2014-03-21	Vegetative	22.5	34.8	27.2	0	11:20:00	12:40:00
TP-F	2014-04-02	Inflorescence	24	33.9	27.2	0.4	11:10:00	12:30:00	Leaf data was obtained from Suhaimi et al. (2023). The data can be found in the same BioProject Accession PRJNA768952.
TP-G	2014-05-14	Flowering	22.4	32.5	25.5	2	12:00:00	13:10:00
TP-H	2014-06-17	Abortion/Fruiting	22.5	34.5	28.2	0	11:15:00	12:20:00	Leaf data was obtained from Suhaimi et al. (2023). The data can be found in the same BioProject Accession PRJNA768952.

## Sheet: S2
Table S2. Pairwise comparisons of the samples for differential expression analysis. X indicates the pair of timepoints compared.
	TP-A	TP-B	TP-C	TP-D	TP-E	TP-F	TP-G	TP-H
TP-A
TP-B	X
TP-C	X	X
TP-D	X	X	X
TP-E	X	X	X	X
TP-F	X	X	X	X	X
TP-G	X	X	X	X	X	X
TP-H	X	X	X	X	X	X	X

## Sheet: S3
Table S3. Description of A. thaliana gene sets used for comparison with S. curtisii DEUs
No.	Description	Reference
1	Upregulated genes under severe drought condition	Harb, Krishnan, Ambavaram, and Pereira (2010)
2	Downregulated genes under severe drought condition	Harb, Krishnan, Ambavaram, and Pereira (2010)
3	Upregulated genes under prolonged moderate drought condition	Harb, Krishnan, Ambavaram, and Pereira (2010)
4	Downregulated genes under prolonged moderate drought condition	Harb, Krishnan, Ambavaram, and Pereira (2010)
5	Commonly upregulated genes under 41 abiotic and biotic stress conditions (general stress response genes)	Ma and Bohnert (2007)
6	Upregulated genes with increase in temperature	Kobayashi et al. (unpublished data)
7	Downregulated genes with increase temperature	Kobayashi et al. (unpublished data)
8	Upregulated genes with temperature decrease*	Gould et al. (2006)
9	Downregulated genes with temperature decrease*	Gould et al. (2006)
10	Upregulated genes with abscisic acid treatment	Nemhauser et al. (2006)
11	Downregulated genes with abscisic acid treatment	Nemhauser et al. (2006)
12	Upregulated genes with brassinosteroid acid treatment	Nemhauser et al. (2006)
13	Downregulated genes with brassinosteroid acid treatment	Nemhauser et al. (2006)
14	Upregulated genes with cytokinin treatment	Nemhauser et al. (2006)
15	Downregulated genes with cytokinin treatment	Nemhauser et al. (2006)
16	Upregulated genes with ethylene treatment	Nemhauser et al. (2006)
17	Downregulated genes with ethylene treatment	Nemhauser et al. (2006)
18	Upregulated genes with indole-3-acetic acid treatment	Nemhauser et al. (2006)
19	Downregulated genes with indole-3-acetic acid treatment	Nemhauser et al. (2006)
20	Upregulated genes with jasmonic acid treatment	Nemhauser et al. (2006)
21	Downregulated genes with jasmonic acid treatment	Nemhauser et al. (2006)
22	Upregulated genes with gibberellin treatment*	Cao, Cheng, Wu, Soo, and Peng (2006)
23	Downregulated genes with gibberellin treatment*	Cao, Cheng, Wu, Soo, and Peng (2006)
24	Upregulated genes under carbon-limited condition	Osuna et al. (2007)
25	Downregulated genes under carbon-limited condition	Osuna et al. (2007)
26	Upregulated genes after the addition of sucrose under carbon-limited condition	Osuna et al. (2007)
27	Downregulated genes after the addition of sucrose under carbon-limited condition	Osuna et al. (2007)
28	Upregulated genes under long-term phosphate-limited condition	Misson et al. (2005)
29	Downregulated genes under long-term phosphate-limited condition	Misson et al. (2005)
30	Upregulated genes under medium-term phosphate-limited condition	Misson et al. (2005)
31	Downregulated genes under medium-term phosphate-limited condition	Misson et al. (2005)
32	Upregulated genes under short-term phosphate-limited condition	Misson et al. (2005)
33	Downregulated genes under short-term phosphate-limited condition	Misson et al. (2005)
34	Upregulated genes under nitrogen-limited condition	Scheible et al. (2004)
35	Downregulated genes under nitrogen-limited condition	Scheible et al. (2004)
References:
Cao, D. N., Cheng, H., Wu, W., Soo, H. M., & Peng, J. R. (2006). Gibberellin mobilizes distinct DELLA-dependent transcriptomes to regulate seed germination and floral development in arabidopsis. Plant Physiology, 142(2), 509-525. doi:10.1104/pp.106.082289
Gould, P. D., Locke, J. C. W., Larue, C., Southern, M. M., Davis, S. J., Hanano, S., . . . Hall, A. (2006). The molecular basis of temperature compensation in the Arabidopsis circadian clock. Plant Cell, 18(5), 1177-1187. doi:10.1105/tpc.105.039990
Harb, A., Krishnan, A., Ambavaram, M. M. R., & Pereira, A. (2010). Molecular and Physiological Analysis of Drought Stress in Arabidopsis Reveals Early Responses Leading to Acclimation in Plant Growth. Plant Physiology, 154(3), 1254-1271. doi:10.1104/pp.110.161752
Ma, S. S., & Bohnert, H. J. (2007). Integration of Arabidopsis thaliana stress-related transcript profiles, promoter structures, and cell-specific expression. Genome Biology, 8(4). doi:ARTN R4910.1186/gb-2007-8-4-r49
Misson, J., Raghothama, K. G., Jain, A., Jouhet, J., Block, M. A., Bligny, R., . . . Thibaud, M. C. (2005). A genome-wide transcriptional analysis using Arabidopsis thaliana Affymetrix gene chips determined plant responses to phosphate deprivation. Proceedings of the National Academy of Sciences of the United States of America, 102(33), 11934-11939. doi:10.1073/pnas.0505266102
Nemhauser, J. L., Hong, F. X., & Chory, J. (2006). Different plant hormones regulate similar processes through largely nonoverlapping transcriptional responses. Cell, 126(3), 467-475. doi:10.1016/j.cell.2006.05.050
Osuna, D., Usadel, B., Morcuende, R., Gibon, Y., Blasing, O. E., Hohne, M., . . . Stitt, M. (2007). Temporal responses of transcripts, enzyme activities and metabolites after adding sucrose to carbon-deprived Arabidopsis seedlings. Plant Journal, 49(3), 463-491. doi:10.1111/j.1365-313X.2006.02979.x
Scheible, W. R., Morcuende, R., Czechowski, T., Fritz, C., Osuna, D., Palacios-Rojas, N., . . . Stitt, M. (2004). Genome-wide reprogramming of primary and secondary metabolism, protein synthesis, cellular growth processes, and the regulatory infrastructure of Arabidopsis in response to nitrogen. Plant Physiology, 136(1), 2483-2499. doi:10.1104/pp.104.047019

## Sheet: S4
Table S4. Summary of BUSCO analysis
Description	No. of genes recovered in the transcriptome	No. of genes per total BUSCO genes)(%)
Complete BUSCOs (C)	1541	95.4771
Complete and single-copy BUSCOs (S)	311	19.2689
Complete and duplicated BUSCOs (D)	1230	76.2082
Fragmented BUSCOs (F)	49	3.03594
Missing BUSCOs (M)	24	1.48699
Total BUSCO genes searched	1614	100

## Sheet: S5
Table S5. The number of unigenes in the leaf and bud transcriptome of Shorea curtisii annotated using public protein databases.
Database	No. of unigenes	Percentage (%)*
Araport	51654	80.43
UniProt	50381	78.45
Pfam	47610	74.14
PANTHER	55929	87.09
GO	51503	80.2
KEGG	25589	39.85
Annotated in at least one database	58722	91.44
Annotated in all the databases	22508	35.05
* Percentage of annotated unigenes over total assembled unigenes (64,219 unigenes).

## Sheet: S6
Table S6. Read count (before normalization) of unigenes in leaf of S. curtisii
Unigene	Read count C1-TP-A	Read count C1-TP-B	Read count C1-TP-C	Read count C1-TP-D	Read count C1-TP-E	Read count C1-TP-F	Read count C1-TP-G	Read count C1-TP-H	Read count C2-TP-A	Read count C2-TP-B	Read count C2-TP-C	Read count C2-TP-D	Read count C2-TP-E	Read count C2-TP-F	Read count C2-TP-G	Read count C2-TP-H	TAIR_ID	UniProt_ID	Pfam_ID	PANTHER_ID
TRINITY_DN0_c0_g1_i10	281.471	364.392	47.061	92.808	72.646	266.166	164.227	78.119	101.627	61.267	32.216	58.028	45.682	66.939	58.755	152.391	AT5G57740	Q6KAE5	PF12796|PF12796|PF12796	PTHR24128|PTHR24128:SF63
TRINITY_DN0_c0_g1_i12	25.723	115.978	11.025	34.634	19.187	52.018	44.371	1.211	23.717	20.457	20.488	14.732	6.825	12.967	27.24	48.302	AT5G57740	Q6NLQ8	PF00023|PF12796|PF12796	PTHR24128:SF63|PTHR24128
TRINITY_DN0_c0_g1_i2	450.019	716.637	300.014	416.751	374.168	506.192	434.736	400.671	224.656	304.277	241.296	135.24	170.493	308.094	169.005	250.307	AT5G57740	Q6KAE5	PF12796|PF12796|PF12796	PTHR24128|PTHR24128:SF63
TRINITY_DN10000_c0_g1_i1	5.661	41.472	0	0	0	12.277	34.403	1.876	0	0	0	4.295	18.799	14.777	0	0	AT1G75670	O43036		PTHR12709:SF5|PTHR12709
TRINITY_DN10000_c0_g1_i4	68.683	316.452	50	82.306	87.926	71.15	124.923	81.68	73	41	80	58.705	207.986	134.213	75.053	122.584	AT1G75670	O43036		PTHR12709:SF5|PTHR12709
TRINITY_DN10000_c0_g1_i5	1.656	8.101	0	5.694	5.074	1.605	1.674	3.443	0	0	0	0	8.215	7.009	1.947	2.416	AT1G75670	O43036		PTHR12709|PTHR12709:SF5
TRINITY_DN100031_c0_g1_i1	0	0	0	0	0	0	6	2	0	0	0	0	0	0	0	0
TRINITY_DN10003_c0_g1_i1	81	223	0	1	0	39	3	0	2	4	2	1	2	0	0	1	AT2G23690		PF14009	PTHR33052|PTHR33052:SF128
TRINITY_DN10003_c0_g2_i1	10	2	4	0	1	10	6	0	0	0	0	1	0	0	0	0	AT2G23690		PF14009	PTHR33052|PTHR33052:SF128
TRINITY_DN100046_c0_g2_i1	0	0	0	0	0	0	0	0	0	0	0	0	0	0	0	3	AT2G39060	Q9FPN0	PF03083	PTHR10791:SF134|PTHR10791
TRINITY_DN10004_c0_g1_i5	191.186	215	161	308	284	181	229.99	259	101	101	116	98	91	75	97	122	AT1G29820		PF01544	PTHR46950|PTHR46950:SF2
TRINITY_DN10005_c0_g1_i10	484.409	550.558	633.767	1143.31	976.175	778.658	1018.79	863.847	629.201	823.458	608.455	556.712	735.311	545.497	606.306	893.329	AT2G03890	Q9SI52	PF00454	PTHR45800:SF12|PTHR45800
TRINITY_DN10005_c0_g1_i11	129	122.443	110.233	195.69	141.009	115.342	124.216	110.541	103.799	60.542	87.545	77.288	116.689	108.503	67.694	126.671	AT5G15730	Q9LFV3	PF07714	PTHR47989:SF43|PTHR47989
TRINITY_DN100063_c0_g4_i3	0	0	0	0	0	0	3	1	4	0	3	0	0	0	1	10	AT5G23900	O59931	PF01294	PTHR11722|PTHR11722:SF0
TRINITY_DN100067_c0_g1_i1	0	0	1	0	5	0	2	6	0	0	0	0	0	0	0	0		Q2W4T8	PF00015|PF17200|PF00672	PTHR32089|PTHR32089:SF92
TRINITY_DN10006_c0_g1_i1	2.758	0	0	10.614	0	0	0	0	1.862	0	5.714	11.328	0	9.472	1.627	0	AT3G57300	Q8RXS6	PF00176|PF13892	PTHR45685|PTHR45685:SF2
TRINITY_DN10006_c0_g1_i4	130.496	48.502	30.209	32.907	111.061	67.014	74.764	64.014	10.397	57.149	39.923	74.374	42.919	86.082	20.535	60.461	AT3G57300	Q8RXS6	PF00271|PF00176|PF13892	PTHR45685:SF2|PTHR45685
TRINITY_DN10006_c0_g1_i5	16.267	10.699	13.207	m	15.282	32.186	1.831	1.669	0	0	0	0	1.408	4.544	4.656	5.877	AT3G57300	Q8RXS6	PF13892|PF00176	PTHR45685:SF2|PTHR45685
TRINITY_DN10006_c0_g1_i6	1326.45	1764.47	1299.2	2228.97	1616.63	1435.24	2113.77	1465.78	1265.74	1177.33	1112.36	980.449	1015.67	1233.87	803.86	1209.66	AT3G57300	Q8RXS6	PF13892|PF00271|PF00176	PTHR45685|PTHR45685:SF2
TRINITY_DN100077_c0_g1_i1	0	0	0	0	0	0	0	0	0	0	0	0	0	0	0	0	AT2G26830	P54352	PF01633	PTHR22603:SF76|PTHR22603
TRINITY_DN100088_c0_g1_i2	0	4	0	2	7	3	4	5	0	0	0	0	0	0	0	0		P52685	PF03466|PF00126	PTHR30579|PTHR30579:SF3
TRINITY_DN10008_c0_g1_i1	113.982	178.127	131	277.265	259	170	247.741	234.023	115	140	139	147	155	149	125	175	AT2G44020	Q9ZT96	PF02536	PTHR13068|PTHR13068:SF24
TRINITY_DN100093_c0_g1_i1	0	0	0	0	0	0	6	4	4	0	0	0	0	0	1	0	AT1G20630
TRINITY_DN1000_c0_g1_i1	75	264.954	24	64	87	69	138	80	30	62	23	29	59	34	31	67	AT5G15770	Q9LFU9	PF00583	PTHR13355:SF11|PTHR13355
TRINITY_DN1000_c0_g2_i1	13	9	9	16	11	11	13	10	13	9	9	7	14	13	12	20	AT5G15770	Q9LFU9	PF00583	PTHR13355|PTHR13355:SF11
TRINITY_DN100109_c0_g1_i1	0	0	0	0	0	0	0	0	0	0	0	0	0	0	2	2	AT3G57870	P40984	PF00179	PTHR24067:SF248|PTHR24067
TRINITY_DN10010_c0_g1_i1	30.896	47.653	21.815	7.464	38.42	38.401	79.007	0	34.546	34.483	11.053	14.999	21.743	40.111	6.923	0			PF04819	PTHR47830|PTHR47830:SF2
TRINITY_DN10010_c0_g1_i7	152.104	67.347	44.186	77.536	8.58	201.599	65.993	69	22.454	157.517	21.947	26.001	14.257	23.889	26.077	66	AT2G33385	F4IVU1	PF04045	PTHR12058|PTHR12058:SF1
TRINITY_DN100111_c0_g1_i1	0	0	0	2	0	0	6	0	4	0	1	0	1	4	6	1	AT3G06240	Q8GXC7	PF00646|PF07734	PTHR31790:SF166|PTHR31790
TRINITY_DN100131_c0_g1_i1	0	0	0	0	0	0	0	0	0	0	0	0	0	0	0	0	AT1G07030	O14281	PF00153|PF00153|PF00153	PTHR45758:SF4|PTHR45758
TRINITY_DN100144_c0_g1_i2	0	0	6	0	0	0	1	19	1	1	1	0	1	0	3	12	AT2G45140	O60119	PF00635	PTHR10809:SF6|PTHR10809
TRINITY_DN100148_c0_g2_i1	0	0	0	0	0	0	0	10	2	0	1	0	0	0	0	1	AT1G12520	Q6BZU2	PF00080|PF00403	PTHR10003:SF89|PTHR10003
TRINITY_DN100148_c0_g2_i2	0	0	1	0	0	0	0	0	0	0	0	0	0	0	0	0	AT1G12520	Q6BZU2	PF00080|PF00403	PTHR10003:SF89|PTHR10003
TRINITY_DN10016_c0_g1_i1	20.374	45.562	17.394	26.951	33.312	22.782	48.017	30.818	38.747	23.23	22.251	33.3	47.761	54.915	16.277	19.614	AT3G12210
TRINITY_DN10016_c0_g1_i2	121.333	176.387	129.606	316.586	303.689	132.789	225.358	266.663	296.368	224.651	312.527	312.59	317.972	236.767	247.274	215.03	AT3G12210			PTHR21521
TRINITY_DN10016_c0_g1_i4	4.293	14.051	0	10.464	13.999	1.429	28.626	1.519	57.896	25.119	42.222	60.111	25.266	44.318	29.449	16.356	AT3G12210			PTHR21521
TRINITY_DN100177_c0_g1_i10	56.175	146.171	63.15	200.315	131.348	61.295	98.1	155.446	89.049	56.018	93.017	69.54	127.249	151.904	64.648	61.054	AT5G21430	Q84VQ4		PTHR47726
TRINITY_DN100177_c0_g1_i3	210.686	339.357	476.551	808.889	883.752	218.645	485.087	849.536	534.708	467.395	703.999	739.789	332.152	392.806	298.635	127.528	AT5G21430	Q84VQ4		PTHR47726
TRINITY_DN100177_c0_g1_i4	26.133	10.337	52.298	44.351	80.521	20.06	32.064	45.284	24.245	2.587	19.984	10.672	10.105	28.29	28.147	3.418	AT5G21430	Q84VQ4		PTHR47726
TRINITY_DN100180_c0_g1_i1	0	0	0	3	0	0	0	0	0	0	0	0	0	0	0	0				PTHR28285:SF1|PTHR28285
TRINITY_DN10019_c0_g1_i5	5	1	3	9	7	1	6	1	35	7	22.009	15	21	23	26	23		Q4R6I1	PF17921|PF13456|PF00665	PTHR46387:SF6|PTHR46387
TRINITY_DN10019_c1_g1_i1	22.401	53.616	22.488	30.147	30.93	13.578	31.97	21.902	10.926	4.261	8.79	11.106	4.049	15.381	3.953	7.259	AT4G22300	Q8GYK2	PF02230	PTHR10655:SF62|PTHR10655
TRINITY_DN10019_c1_g1_i2	126.005	184.901	92.183	85.243	81.102	85.43	11.75	35.606	9.597	0	9.945	0	0	9.802	3.01	0	AT4G22300	Q8GYK2	PF02230|PF02230	PTHR10655|PTHR10655:SF62|PTHR10655|PTHR10655:SF62
TRINITY_DN10019_c1_g1_i4	72.018	53.745	47.365	69.836	68.647	39.176	38.448	43.206	30.071	6.558	21.617	15.582	9	24.683	9.675	12.152
TRINITY_DN10019_c1_g1_i9	219.576	392.824	191.964	258.766	229.471	242.952	200.832	242.29	46.407	97.181	56.649	64.312	61.951	55.134	43.362	52.589	AT4G22300	Q8GYK2	PF02230	PTHR10655:SF62|PTHR10655
TRINITY_DN10019_c1_g2_i1	506.432	1171.62	285.823	576.971	647.948	405.963	734.075	432.032	385.315	331	220.449	287.498	838.262	670.041	235.474	489.486	AT4G22300	Q8GYK2	PF02230	PTHR10655|PTHR10655:SF62
TRINITY_DN10019_c1_g2_i2	47.572	87.393	17.177	73.157	75.552	67.158	73.748	40.215	20.685	0	10.551	5.502	9.566	39.959	17.526	12.514	AT4G22300	Q8GYK2	PF02230	PTHR10655:SF62|PTHR10655
TRINITY_DN10019_c1_g3_i1	114.132	17.498	17.188	0	1.872	40.457	8.096	4.682	2.298	25.396	9.786	6.29	2.359	5.243	1.999	2.299	AT4G31540	A0A396JG59	PF03081	PTHR12542:SF145|PTHR12542
TRINITY_DN10019_c1_g3_i2	327.856	427.498	183.812	398	328.176	388.543	682.927	220.318	177.702	215.604	176.214	151.71	208.641	249.757	105.001	239.701	AT4G31540	A0A396JG59	PF03081	PTHR12542|PTHR12542:SF147
TRINITY_DN1001_c0_g1_i1	6.359	0	10.637	3.172	4.395	3.642	32.152	23.071	61.491	4.317	48.145	29.265	14.346	63.575	0	20.027	AT5G66840	Q338N2	PF02037	PTHR35323|PTHR35323:SF2
TRINITY_DN1001_c0_g1_i12	58.844	50.885	45.073	121.56	72.556	82.986	82.521	125.306	136.742	35.33	52.806	63.585	29.844	87.325	27.937	84.669	AT5G66840	Q338N2	PF02037	PTHR35323|PTHR35323:SF2
TRINITY_DN1001_c0_g1_i2	155.971	146.807	117.099	163.048	226.217	98.768	101.168	119.195	374.211	267.165	313.415	334.52	301.143	266.698	241.945	334.051	AT5G66840	Q338N2	PF02037	PTHR35323|PTHR35323:SF2
TRINITY_DN1001_c0_g1_i4	83.403	29.106	32.497	65.681	57.563	34.668	55.666	99.087	0	0	0	0	0	0	0	0	AT5G66840	Q338N2		PTHR35323|PTHR35323:SF2
TRINITY_DN1001_c0_g1_i8	116.468	152.202	121.694	273.539	200.341	138.936	202.493	216.342	17.556	0	5.617	0	2.667	11.421	0	0	AT5G66840	Q338N2		PTHR35323|PTHR35323:SF2
TRINITY_DN1001_c0_g1_i9	0	0	0	0	0	0	0	0	0	20.213	27.686	24.63	0	20.981	28.118	6.253	AT5G66840	Q338N2		PTHR35323|PTHR35323:SF2
TRINITY_DN100206_c0_g1_i1	0	0	0	0	1	0	0	2	0	0	0	0	0	0	0	0		Q7SGY6	PF05328	PTHR13337
TRINITY_DN10020_c0_g1_i1	11.741	0	40.645	91.16	52.359	7.775	45.195	70.35	48.968	8.192	57.108	43.533	48.022	75.638	52.769	28.673	AT2G36690	Q6Z244	PF14226	PTHR10209|PTHR10209:SF460
TRINITY_DN10020_c0_g1_i3	14.17	28.925	69.618	190.84	156.678	40.225	120.797	105.65	154.032	85.808	200.892	228.467	537.978	543.362	255.231	233.327	AT2G36690	Q6Z244	PF03171|PF14226	PTHR10209:SF460|PTHR10209
TRINITY_DN10020_c0_g1_i4	0	10.075	0	0	6.963	0	2.185	0	0	0	0	0	0	0	0	0	AT2G36690	Q6Z244	PF14226|PF03171	PTHR10209:SF460|PTHR10209
TRINITY_DN100214_c0_g1_i1	0	0	5	0	4	0	3	24	2	1	2	0	0	0	1	65	AT2G41840	P25443	PF03719|PF00333	PTHR13718:SF103|PTHR13718
TRINITY_DN10021_c0_g1_i3	990.042	1123.99	519	690	431	702.964	448	318	298	310.94	377.169	199.36	98	188	108	111	AT3G14130	Q9LJH5	PF01070	PTHR10578:SF116|PTHR10578
TRINITY_DN10023_c0_g1_i1	999.543	1247.1	1032.71	1917.37	1517.86	875.165	1494.26	1188.76	803.046	745.309	696.435	707.391	414.201	399.793	679.641	772.377	AT5G15270	P58223	PF00013|PF00013|PF00013|PF00013	PTHR10288|PTHR10288:SF274
TRINITY_DN10023_c0_g1_i15	973.969	1085.62	700.007	1287.43	1235.54	986.635	1020.11	930.161	976.006	909.901	840.378	855.273	650.959	757.568	772.833	911.757	AT5G15270	P58223	PF00013|PF00013|PF00013|PF00013	PTHR10288|PTHR10288:SF274
TRINITY_DN10023_c0_g1_i17	167.434	242.403	88.289	271.832	286.773	157.987	131.914	135.295	92.66	21.771	62.187	76.308	6.862	75.639	45.526	50.866	AT5G15270	P58223	PF00013|PF00013|PF00013|PF00013	PTHR10288:SF274|PTHR10288
TRINITY_DN100259_c0_g1_i1	0	0	0	0	0	0	0	0	0	0	0	0	0	0	0	0		Q5ANE3	PF01284	PTHR28165|PTHR28165:SF1
TRINITY_DN100259_c0_g1_i2	0	0	0	0	0	0	0	0	0	0	0	0	0	0	0	0		Q12207	PF01284	PTHR28165|PTHR28165:SF1
TRINITY_DN10025_c0_g1_i5	72.826	107.97	56	116.178	64.753	56	115.398	101.481	32.944	18	46.786	62	31	35.625	41.793	36
TRINITY_DN10026_c0_g1_i2	146.569	377.215	81.419	214.115	189.913	165.233	178.336	145.166	100.498	167	92.751	103	60.95	65.242	45	53	AT3G19540		PF04788	PTHR31300:SF31|PTHR31300
TRINITY_DN10026_c0_g1_i3	15.431	0	8.722	6.868	0	1.943	10.347	7.312	0	0	0	0	33.314	5.758	0	0	AT3G19540		PF04788	PTHR31300:SF31|PTHR31300
TRINITY_DN10026_c0_g1_i6	99	114.193	41.916	40	85.878	92.887	18.006	47.686	54.396	67	55.725	47	42.61	43	32	74	AT3G19540		PF04788	PTHR31300:SF31|PTHR31300
TRINITY_DN10026_c0_g1_i7	0	33.585	3.926	2.016	14.21	14.04	5.317	6.836	27.105	0	10.523	0	12.127	0	0	0	AT3G19540		PF04788	PTHR31300|PTHR31300:SF31
TRINITY_DN10027_c0_g2_i1	5.608	0	42.224	45.651	39.901	5.094	12.713	38.157	17.446	0	11	0	0	5.365	0	1.548		O04974	PF14244
TRINITY_DN10027_c0_g2_i3	8.986	0	23.541	65.349	24.099	15.906	23.316	24.562	0	0	0	6	5	0	7	0
TRINITY_DN10027_c0_g2_i5	1.406	0	0	0	0	0	4.971	1.41	4.554	1	0	0	0	8.635	0	4.452		O04974	PF14223	PTHR34222:SF43|PTHR34222
TRINITY_DN100288_c0_g1_i3	0	0	0	0	0	0	5	4	0	0	1	0	0	0	2	0
TRINITY_DN10028_c2_g1_i1	2	4	0	0	0	0	0	0	0	0	0	1	0	0	2	0	AT3G47870	Q9STS6	PF03195	PTHR31301:SF21|PTHR31301
TRINITY_DN100292_c0_g1_i1	1	0	3	6	5	3.236	1	0	0	0	0	0	0	0	0	0	AT5G45540		PF04578	PTHR31325:SF222|PTHR31325
TRINITY_DN100292_c0_g1_i2	7	0	0	0	0	9	0	0	0	0	0	0	0	0	0	0	AT5G45540		PF04578	PTHR31325:SF222|PTHR31325
TRINITY_DN100292_c0_g1_i3	0	0	0	1	0	0	0	0	0	0	1	0	0	0	0	0	AT5G45530		PF04578	PTHR31325|PTHR31325:SF222
TRINITY_DN100292_c0_g1_i4	6	6	0	0	0	8.764	0	0	0	0	1	0	0	0	0	0	AT5G45540		PF04578	PTHR31325:SF222|PTHR31325
TRINITY_DN100292_c0_g1_i5	0	0	0	0	0	0	0	0	1	0	0	2	1	0	1	1	AT5G45530		PF04578	PTHR31325:SF222|PTHR31325
TRINITY_DN100292_c0_g1_i8	7	0	0	0	0	5	0	0	0	7	1	1	0	0	0	0	AT5G45530		PF04578	PTHR31325|PTHR31325:SF222
TRINITY_DN1002_c0_g1_i1	337.293	352.687	269.152	729.398	636.249	1589.18	2605.34	412.764	602.935	320.245	53.491	168.728	1499.78	1108.17	312.895	2048.67	AT3G12500	Q41596	PF00182|PF00187	PTHR22595|PTHR22595:SF143
TRINITY_DN1002_c0_g1_i4	280.064	44.474	235.165	568.479	640.98	2274.07	1225.19	1607.12	1037.02	654.394	196.978	301.35	307.223	722.309	584.173	1153.94	AT3G12500	Q41596	PF00182|PF00187	PTHR22595:SF143|PTHR22595
TRINITY_DN1002_c0_g1_i5	0	15.987	20.819	47.038	0	21.739	27.372	0	18.614	2.985	20.921	18.494	15.059	16.873	27.954	24.776	AT3G12500	Q41596	PF00187|PF00182	PTHR22595|PTHR22595:SF171
TRINITY_DN1002_c0_g1_i6	0	0	2.481	0	2.235	14.556	20.599	0	17.123	0	9.413	0	11.532	98.432	0	10.625	AT3G12500	Q39799	PF00182	PTHR22595:SF144|PTHR22595
TRINITY_DN1002_c0_g1_i7	209.607	111.739	468.606	782.02	444.281	274.668	483.505	712.167	307.973	145.86	288.159	217.056	66.547	193.238	138.668	82.445	AT3G12500	Q41596	PF00182	PTHR22595:SF171|PTHR22595|PTHR22595:SF143
TRINITY_DN1002_c0_g1_i8	432.704	342.467	403.975	732.928	705.438	377.014	496.509	580.992	133.026	158.695	202.066	143.016	152.871	85.697	124.894	132.368	AT3G12500	Q41596	PF00182	PTHR22595|PTHR22595:SF167
TRINITY_DN1002_c0_g2_i2	1228.79	386.765	387.54	1451.53	701.544	745.878	4090.95	464.952	985.059	241.379	156.808	382.228	660.05	2027.07	360.927	920.832	AT2G17040	I1LPE9	PF02365	PTHR31989|PTHR31989:SF339
TRINITY_DN1002_c0_g2_i3	80.064	39.823	0	102.613	67.156	50.634	746.317	46.308	69.487	5.863	0	0	55.591	166.19	19.422	7.429	AT2G17040	I1LPE9	PF02365	PTHR31989:SF339|PTHR31989
TRINITY_DN10030_c0_g1_i3	29.778	35.522	54.938	192.219	77.896	42.148	96.332	74.173	58.922	16.211	36.664	31.019	0	12.997	24.505	5.407	AT3G11330	Q8VYG9	PF13855	PTHR45752|PTHR45752:SF120
TRINITY_DN10030_c0_g1_i4	319.222	311.478	287.062	526.781	452.135	355.843	510	457.829	391.064	267.789	306.336	335.981	334	407.003	227.495	304.593	AT3G11330	Q8VYG9	PF13855|PF13855	PTHR45752|PTHR45752:SF120
TRINITY_DN100312_c0_g2_i1	0	0	1	2	0	0	7	13	0	1	0	0	0	0	1	1
TRINITY_DN100345_c0_g1_i3	0	3	2	0	0	0	3	0	2	0	0	0	0	0	0	2
TRINITY_DN100349_c0_g1_i1	0	0	0	1	0	0	0	0	1	0	0	0	0	0	0	2			PF04426
TRINITY_DN10035_c0_g1_i3	438.626	178	82	468	225	329.01	519	136	303.001	108	87	259	226	420	271	332	AT5G61190	Q9Y4F3	PF01936|PF14418	PTHR14379:SF29|PTHR14379|PTHR14379|PTHR14379:SF29
TRINITY_DN100364_c0_g3_i2	0	0	0	2	0	0	2	10	0	0	0	0	0	0	0	0
TRINITY_DN100381_c0_g1_i1	0	0	0	3	2	0	0	7.698	0	0	0	0	0	0	0	0	AT4G21210	Q89WP1	PF03618	PTHR31756|PTHR31756:SF3
TRINITY_DN100381_c0_g2_i1	0	0	0	1	11	0	0	2.311	0	0	0	0	0	0	0	0		Q9ZC85	PF03653	PTHR40255
TRINITY_DN100384_c0_g2_i1	0	0	0	1	0	0	0	0	0	0	0	0	0	0	0	0
TRINITY_DN10038_c0_g1_i10	89.662	250.551	8.375	0	21.913	82.733	0	0	37	39.464	23.944	28.599	45.606	66.562	77.751	24.72	AT1G68570	Q9SX20	PF00854	PTHR11654|PTHR11654:SF326
TRINITY_DN10038_c0_g1_i11	16.246	15.114	0	0	0	2.108	6.283	0	0	0	0	0	0	0	0	0	AT1G68570	Q9SX20	PF00854	PTHR11654:SF326|PTHR11654
TRINITY_DN10038_c0_g1_i14	0	95.944	8.069	27.656	9.293	4.918	18.717	16	0	0	3.174	0	0	17.661	3.661	0	AT1G68570	Q9SX20	PF00854	PTHR11654|PTHR11654:SF326
TRINITY_DN10038_c0_g1_i9	46.091	102.418	3.556	6.344	5.793	18.281	0	3	0	2.536	7.882	11.401	24.394	24.777	12.588	14.28	AT1G68570	Q9SX20	PF00854	PTHR11654:SF326|PTHR11654
TRINITY_DN10038_c0_g2_i1	1	0	0	0	0	0	0	0	0	0	0	0	0	0	0	0
TRINITY_DN10039_c0_g1_i2	9.83	42.682	16.32	67.871	55.61	25.373	27.474	0	17.98	7.043	25.185	18.75	6.034	6.502	9.58	0				PTHR34466|PTHR34466:SF3
TRINITY_DN10039_c0_g1_i4	159.522	243.496	92.177	134.068	91.39	147.52	81.526	131.49	67.534	116.499	52.632	83.25	44.966	62.46	33.42	58.719				PTHR34466:SF3|PTHR34466
TRINITY_DN10039_c0_g1_i5	2.822	3.244	0	4.387	0	4.107	0	0	1.293	0	1.439	0	0	0	0	0				PTHR34466:SF3|PTHR34466
TRINITY_DN10039_c0_g1_i6	0	9.578	10.503	4.673	0	0	0	0	4.193	1.459	0	0	0	3.038	0	3.08				PTHR34466|PTHR34466:SF3
TRINITY_DN10039_c0_g1_i7	0	0	0	0	0	0	0	0	0	0	1.744	0	0	0	0	0				PTHR34466:SF3|PTHR34466
TRINITY_DN10039_c0_g1_i8	3.826	0	0	0	0	0	0	8.51	0	0	0	0	0	0	0	4.201				PTHR34466:SF3|PTHR34466
TRINITY_DN1003_c0_g1_i1	20	466	2	2	0	9	1	0	0	2	0	0	0	0	1	89	AT5G60800	Q9FJH5	PF00403|PF00403	PTHR46413|PTHR46413:SF2
TRINITY_DN1003_c0_g1_i11	77.12	174.999	33	79	32	69	38	99	14	12	3	7	12	13	18	17	AT5G60800	Q9FJH5		PTHR46413:SF7|PTHR46413
TRINITY_DN100401_c0_g1_i1	3	7	0	0	0	1	0	0	2	1	0	0	0	0	0	0	AT5G45820	Q9LWM4	PF00069	PTHR43895:SF3|PTHR43895
TRINITY_DN100402_c0_g1_i1	1	0	0	6	0	6	0	0	0	0	0	0	0	0	0	0		Q8DP63	PF01522	PTHR10587|PTHR10587:SF105
TRINITY_DN100405_c0_g1_i1	0	0	0	0	0	0	2	4	0	0	0	0	0	0	1	9	AT3G56120	C7YK87	PF02475	PTHR23245:SF36|PTHR23245
TRINITY_DN10040_c1_g1_i1	0	32.01	4.371	23.599	18.278	0	20.968	4.653	5.278	1.596	3.731	1.424	0	1.647	4.195	2.147	AT4G08630	Q8RWD5		PTHR31762|PTHR31762:SF10
TRINITY_DN10040_c1_g1_i10	0	25.362	3.773	3.786	22.348	0	34.681	14.87	0	0	12.482	0	0	0	0	0	AT4G08630	Q8RWD5		PTHR31762|PTHR31762|PTHR31762:SF10|PTHR31762:SF10
TRINITY_DN10040_c1_g1_i18	16.542	23.708	19.724	29.778	40.606	8.291	13.351	22.219	15.347	4.404	7.369	6.338	1.503	4.462	9.39	9.527	AT4G08630	Q8RWD5		PTHR31762:SF10|PTHR31762
TRINITY_DN10040_c1_g1_i21	0	0	5.985	0	0	0	0	14.102	0	0	0	0	0	0	0	0	AT4G08630	Q8RWD5		PTHR31762:SF10|PTHR31762|PTHR31762|PTHR31762:SF10
TRINITY_DN10040_c1_g1_i28	6.398	56.921	35.682	81.838	0	0	0	0	0	0	0	0	0	0	0	5.326	AT4G08630	Q8RWD5		PTHR31762:SF10|PTHR31762|PTHR31762:SF10|PTHR31762
TRINITY_DN10040_c1_g1_i3	0	0	0	0	5.453	0	0	0	0	0	0	0	0	0	0	0				PTHR31762:SF10|PTHR31762
TRINITY_DN10040_c1_g1_i37	14.059	0	0	0	18.314	26.709	0	9.156	25.375	0	0	11.238	3.497	10.88	8.415	0	AT4G08630	Q8RWD5		PTHR31762:SF10|PTHR31762|PTHR31762:SF10|PTHR31762
TRINITY_DN10040_c1_g1_i4	0	0	3.466	0	0	0	0	0	1	0	2.417	0	0	3.012	2	0				PTHR31762:SF10|PTHR31762
TRINITY_DN100426_c0_g1_i2	0	3	1	1	6	0	2	5	0	0	0	0	0	0	0	0		O32256	PF00892|PF00892	PTHR22911|PTHR22911:SF113
TRINITY_DN100438_c0_g1_i1	0	0	0	0	0	0	0	0	0	0	0	0	0	0	0	0	AT5G58420	Q4GXU6	PF00900|PF08071|PF00467|PF01479|PF16121	PTHR11581:SF33|PTHR11581:SF33|PTHR11581|PTHR11581
TRINITY_DN100447_c0_g1_i1	0	0	0	0	0	0	0	0	0	0	1	0	0	0	0	0	AT2G39970	P21245	PF00153|PF00153	PTHR45939:SF5|PTHR45939
TRINITY_DN100464_c0_g1_i1	0	0	4.013	2	0	0	1	7	1	0	0	0	0	0	0	1
TRINITY_DN100478_c0_g1_i1	0	0	0	0	0	0	0	0	0	0	0	0	0	0	0	0
TRINITY_DN10047_c0_g1_i1	23.334	37.83	4.993	0	0	24.132	0	3	5.045	11.428	1.608	0	0	0	2	0	AT3G09080	Q6DFF9	PF00400|PF00400|PF00400|PF00400|PF00400	PTHR42968|PTHR42968:SF31
TRINITY_DN10047_c0_g1_i11	2.231	15.786	0	0	0	0	0	0	0	0	0	0	0	0	0	1.492	AT3G09080			PTHR42968:SF29|PTHR42968
TRINITY_DN10047_c0_g1_i12	0	0	0	0	0	0	0	0	1.355	2.858	0	1.525	0	0	0	1.501				PTHR42968:SF29|PTHR42968
TRINITY_DN10047_c0_g1_i13	4.026	30.977	15.007	6.622	13.28	16.868	5	0	4.6	3.714	5.392	0	0	0	0	3.476	AT3G09080			PTHR42968|PTHR42968:SF29
TRINITY_DN10047_c0_g1_i5	15.409	31.406	0	8.378	3.72	0	0	0	0	0	0	3.475	0	0	0	2.531	AT3G09080	Q6DFF9	PF00400|PF00400|PF00400|PF00400|PF00400	PTHR42968|PTHR42968:SF31
TRINITY_DN100482_c0_g2_i1	0	0	3	0	0	0	3	47	2	1	13	0	0	0	9	10	ATMG00510	P22142	PF00346	PTHR11993
TRINITY_DN100486_c0_g1_i1	0	0	0	0	0	0	0	1	0	0	0	0	0	0	0	2	AT4G18330	Q24208		PTHR42854|PTHR42854:SF12
TRINITY_DN10048_c0_g1_i1	731.395	841.854	534.727	1034.07	819.196	802.01	1495.36	978.345	670.792	421.713	442.581	385.43	352.432	414.67	408.983	658.835	AT3G48780	Q9M304	PF00155	PTHR13693:SF88|PTHR13693
TRINITY_DN10048_c0_g1_i11	411.981	434.547	316.437	631.058	571.239	489.054	607.153	441.532	417.879	345.102	287.543	317.698	205.93	477.478	283.974	383.122	AT5G23670	Q9LSZ9	PF00155	PTHR13693|PTHR13693:SF88
TRINITY_DN10048_c0_g1_i15	0	0	0	0	0	0	0	0	0	0	0	0	0	0	0	0	AT3G48780	Q9M304	PF00155	PTHR13693:SF88|PTHR13693
TRINITY_DN10048_c0_g1_i2	10.94	9.615	0	5.424	6.021	7.659	2.827	5.549	14.027	0	3.192	12.269	0	23.781	2.609	0	AT5G23670	Q9LSZ9	PF00155	PTHR13693|PTHR13693:SF88
TRINITY_DN10048_c0_g1_i9	167.685	136.82	102.836	223.452	187.551	68.65	343.616	222.731	67.529	31.166	44.684	56.603	57.638	151.079	41.434	69.043	AT5G23670	Q9LSZ9	PF00155	PTHR13693|PTHR13693:SF88
TRINITY_DN1004_c0_g1_i1	37.099	18.749	19.069	44.722	66.459	11.97	18.143	31.771	143.757	0	13.914	24.726	0	48.278	102.576	117.172	AT5G23540	Q9LT08	PF01398|PF13012	PTHR10410|PTHR10410:SF22
TRINITY_DN1004_c0_g1_i10	200.502	462.747	116.488	182.679	157.147	144.396	265.659	221.237	19.022	181.402	147.31	96.683	204.359	193.324	34.222	128.596	AT5G23540	Q9LT08	PF13012|PF01398	PTHR10410:SF22|PTHR10410
TRINITY_DN1004_c0_g1_i17	168.867	300.628	171.894	252.214	239.81	148.656	238.807	285.734	120.069	65.78	104.407	70.819	81.556	108.717	91.632	139.055	AT5G23540	Q9LT08	PF01398|PF13012	PTHR10410|PTHR10410:SF22
TRINITY_DN1004_c0_g1_i24	816.47	1052.28	532.65	958.781	818.982	773.141	1018.94	741.958	621.099	605.385	491.547	445.361	544.824	466.325	369.238	771.136	AT1G47480	Q9SX78	PF07859	PTHR23024:SF549|PTHR23024
TRINITY_DN1004_c0_g1_i9	559.005	878.925	437.966	838.9	791.611	492.823	958.7	991.176	640.053	293.669	343.821	550.461	437.132	520.356	496.333	746.04	AT1G47480	Q9SX78	PF07859	PTHR23024:SF525|PTHR23024
TRINITY_DN100504_c0_g1_i3	0	0	0	0	0	0	3	1	2	0	0	0	0	0	0	0			PF12973
TRINITY_DN10051_c0_g1_i3	36.788	136.121	4.827	0	0	5.32	0	0	0	1.917	1.644	0	0	0	0	0	AT5G05180	Q84VY2	PF07765	PTHR32258|PTHR32258:SF14
TRINITY_DN10051_c0_g1_i7	20.212	87.655	9.73	0	0	5.329	0	3.473	0	21.999	0	0	0	0	0	0	AT5G05180	F4KEW8	PF07765	PTHR32258|PTHR32258:SF14
TRINITY_DN10051_c0_g1_i9	0	456.224	2.442	3	5	20.351	1	1.527	3	9.084	4.356	2	3	12	1	7	AT5G05180	Q84VY2	PF07765	PTHR32258:SF14|PTHR32258
TRINITY_DN100521_c0_g3_i1	0	0	0	0	0	1	0	7	1	0	0	1	0	0	0	5		Q9CWK8	PF09325
TRINITY_DN10052_c0_g1_i11	602	738.753	805	1711.74	1501.64	678	1208	1529.01	958.428	712	946.042	734	828	843	602	792	AT2G30160	P10566	PF00153|PF00153|PF00153	PTHR45758|PTHR45758:SF11
TRINITY_DN100535_c0_g1_i1	6.597	0	0	0	0	34	1	0	0	3	0	0	0	0	0	1.268	AT3G07040	Q9XIF0	PF00931	PTHR23155:SF955|PTHR23155
TRINITY_DN100535_c0_g1_i2	2.403	0	0	0	0	0	0	0	0	0	0	0	0	0	0	1.732			PF18052
TRINITY_DN10054_c0_g1_i1	90.294	227.696	156.71	308.609	162.747	89.509	238.79	275.246	87.254	49.205	73.095	28.045	24.614	86.015	31.001	39.323		Q9SK27	PF02298	PTHR33021:SF31|PTHR33021
TRINITY_DN10054_c0_g1_i2	855.861	1973.7	764.648	1256.4	1351.25	1108.55	1349.08	1579.03	791.587	810.795	554.905	432.957	480.386	467.988	394.57	539.677	AT2G32300	O82081	PF02298	PTHR33021:SF31|PTHR33021
TRINITY_DN10054_c1_g1_i1	1	0	0	0	0	0	0	0	0	0	0	0	0	0	0	0	AT4G09060			PTHR35689
TRINITY_DN10054_c1_g1_i4	7	62.486	7	25	33	5	21	4.595	13	4	6	0	6	6	1	6	AT4G09060			PTHR35689
TRINITY_DN10054_c1_g1_i6	0	57	0	0	0	0	0	0	0	0	0	0	0	0	0	0	AT4G09060			PTHR35689
TRINITY_DN10054_c1_g1_i8	0	3.514	0	0	0	0	0	4.405	0	0	0	15	0	0	0	0	AT4G09060			PTHR35689
TRINITY_DN100552_c0_g2_i1	0	0	0	0	0	0	0	0	0	0	0	0	0	0	0	0
TRINITY_DN100552_c0_g2_i2	0	0	1	0	0	0	4	2	1	0	0	0	0	0	0	0
TRINITY_DN100563_c0_g1_i4	0	1	0	0	0	0	0	0	0	0	0	0	0	0	0	0
TRINITY_DN100579_c0_g1_i2	0	0	1	2	0	0	1	0	0	1	0	0	0	0	0	0		P87179	PF01822	PTHR24269:SF21|PTHR24269
TRINITY_DN10057_c0_g1_i2	5	0	2	59.953	23.278	6.691	0	9	28.066	3.177	2.362	0	20.397	24.145	0	0	AT5G23270	Q9FMX3	PF00083	PTHR23500|PTHR23500:SF460
TRINITY_DN10057_c0_g1_i3	0	12.418	0	4.729	7.998	2.128	7.75	0	9.934	1.823	1.638	23.454	13.923	14.101	13.401	7	AT5G23270	Q9FMX3	PF00083	PTHR23500:SF460|PTHR23500
TRINITY_DN10057_c0_g1_i4	0	0	0	0	0	0	0	0	0	0	0	0	0	0	2.095	0	AT5G23270	Q9FMX3	PF00083	PTHR23500|PTHR23500:SF460
TRINITY_DN10057_c0_g1_i8	0	2.582	0	9.319	4.724	1.181	2.25	0	0	0	0	8.546	1.685	3.754	2.504	0	AT5G23270	Q9FMX3	PF00083	PTHR23500:SF460|PTHR23500
TRINITY_DN100586_c0_g1_i1	0	0	1	0	0	0	1	12	0	0	0	0	0	0	0	0	AT1G22170	A1SP05	PF00300	PTHR11931:SF0|PTHR11931
TRINITY_DN1005_c0_g1_i1	269	238	91.316	174	165	268	179	127	120	160	144	98	211	183	113	174	AT5G19820	Q8BKC5	PF13646|PF02985|PF18829|PF18808	PTHR10527:SF78|PTHR10527
TRINITY_DN1005_c0_g2_i1	11.218	0	1.971	0	4.933	2.299	0	0	0	0	0	0	0	0	0	0	AT1G80260	Q8BKN5	PF04130|PF17681	PTHR19302|PTHR19302:SF65
TRINITY_DN1005_c0_g2_i2	16.588	71.639	23.738	63.896	39.026	49.968	35.203	52.485	17.36	21.781	20.69	20.02	25.119	9.688	18.165	24.547	AT1G80260	Q8BKN5	PF04130|PF17681	PTHR19302:SF65|PTHR19302
TRINITY_DN1005_c0_g2_i5	345.711	485.982	269.4	400.065	369.909	206.649	268.772	379.04	269.407	279.916	224.938	198.447	187.78	136.318	128.838	143.799	AT1G80260	Q8BKN5	PF04130|PF17681	PTHR19302:SF65|PTHR19302
TRINITY_DN1005_c0_g2_i6	103.967	319.666	46.008	125.243	95.677	76.685	193.669	188.612	26.691	15.147	21.532	8.004	15.844	33.022	18.403	43.725	AT1G80260			PTHR19302|PTHR19302:SF65
TRINITY_DN1005_c0_g2_i7	18.915	31.269	26.561	72.735	3.455	66.6	60.024	24.896	46.542	11.156	17.84	11.529	3.257	19.972	18.594	10.929	AT1G80260	Q8BKN5	PF17681|PF04130	PTHR19302|PTHR19302:SF65
TRINITY_DN1005_c1_g1_i1	2.394	3.216	1.079	7.693	4.202	1.833	0	3.31	21.516	2.388	14.074	23.2	19.423	28.953	17.007	58.174	AT3G58140	Q94K73	PF03147
TRINITY_DN1005_c1_g1_i2	933.535	997.665	1352.75	2468.21	2231.39	896.075	1753.53	2320.93	1504.57	1423.67	1552.68	1882.68	2035.32	1615.12	1096.48	1469.12	AT3G58140	Q94K73	PF01409	PTHR11538|PTHR11538:SF41
TRINITY_DN1005_c1_g1_i9	252.07	300.119	474.385	695.877	630.412	268.151	647.539	762.126	241.919	213.945	207.244	276.124	326.275	285.928	150.512	204.707	AT3G58140	Q94K73	PF01409	PTHR11538:SF41|PTHR11538
TRINITY_DN100612_c0_g1_i1	0	0	0	0	0	0	0	0	0	0	0	0	0	0	0	0
TRINITY_DN100620_c0_g1_i1	0	0	0	0	0	0	0	0	0	0	0	0	0	0	0	0	AT3G45300	Q9FS87	PF00441	PTHR43884|PTHR43884:SF18
TRINITY_DN100620_c0_g1_i2	0	1	0	0	2	0	0	2	0	0	0	0	0	0	0	0	AT3G45300	Q9FS87	PF00441	PTHR43884|PTHR43884:SF18
TRINITY_DN100620_c0_g2_i2	1	1	0	4	0	0	3	4	0	0	0	0	0	0	0	0	AT3G45300	Q75IM9	PF02771	PTHR43884:SF12|PTHR43884
TRINITY_DN100626_c0_g1_i2	0	0	0	0	0	0	3	0	0	2	0	0	0	0	1	1		G2TRP6	PF02297	PTHR47677
TRINITY_DN10062_c0_g2_i2	230.006	437	232	491	447	275	408.996	460	488	263	358	460	445	274	372	496	AT1G63160	Q7XRX1	PF08542	PTHR11669:SF5|PTHR11669
TRINITY_DN100639_c0_g1_i4	0	0	5	1	0	0	20	23	6	5	1	0	0	0	13	48		B7ZK61	PF00082|PF05922	PTHR43806|PTHR43806:SF11
TRINITY_DN100666_c0_g1_i1	0	0	0	0	0	0	0	19.956	0	0	0	0	0	0	0	0				PTHR39477
TRINITY_DN100666_c0_g1_i2	0.5	0	0	0	0	0	11	16.728	0	1	1	0	0	0	0	3				PTHR39477
TRINITY_DN100666_c0_g1_i3	0.5	0	0	0	0	0	0	25.316	0	1	1	0	0	0	0	3				PTHR39477
TRINITY_DN10066_c0_g3_i1	6	7	2	6	25	8	12	21	7	4	2	3	1	3	6	2
TRINITY_DN100672_c0_g1_i1	0	0	0	0	0	0	1	0	0	0	0	0	0	0	0	0	AT2G31985	B4FFZ9	PF06884	PTHR31360|PTHR31360:SF0
TRINITY_DN10068_c0_g2_i1	0	5.126	0	0	0	2.274	0	0	0	1.132	0	0	1	0	0	0	AT4G39010	Q93YQ7	PF00759	PTHR22298|PTHR22298:SF129
TRINITY_DN10068_c0_g2_i2	584.378	1613.99	67.887	71.835	52.795	234.552	68	53.923	32	57.44	15.854	11	12.961	7	12	17	AT4G39010	Q93YQ7	PF00759	PTHR22298:SF129|PTHR22298
TRINITY_DN10068_c0_g2_i3	5.138	9.207	2.113	1.165	2.205	1.174	0	1.077	0	2.428	2.146	0	1.039	0	0	0	AT4G39010	Q93YQ7	PF00759	PTHR22298|PTHR22298:SF129
TRINITY_DN10069_c0_g1_i1	68.3	29.167	153.35	144.221	143.724	36.307	139.724	50.61	0	0	0	0	0	0	0	0	AT5G20350	Q52T38	PF12796|PF12796|PF13857	PTHR24161|PTHR24161:SF82
TRINITY_DN10069_c0_g1_i2	93.416	52.17	95.47	300.557	187.344	67.659	200.218	171.538	84.016	18.406	30.271	44.264	16.02	47.898	54.678	67.628	AT5G20350	Q52T38		PTHR24161:SF82|PTHR24161
TRINITY_DN10069_c0_g1_i3	0	0	0	0	0	0	0	0	65.34	11.125	53.796	23.264	8.737	50.737	0	25.158	AT5G20350	Q52T38	PF13857|PF12796|PF12796	PTHR24161|PTHR24161:SF82
TRINITY_DN10069_c0_g1_i4	4.093	10.143	5.232	47.733	29.758	7.95	43.63	35.521	8.27	4.843	8.536	3.237	0	15.408	4.414	8.868	AT5G20350	Q52T38		PTHR24161|PTHR24161:SF82
TRINITY_DN10069_c0_g1_i5	710.917	842.784	815.916	1546.78	1142.02	833.222	1418.57	1124.04	757.024	684.625	597.397	453.135	343.496	431.364	467.923	800.826	AT5G20350	Q52T38	PF13857|PF13637|PF12796|PF01529	PTHR24161:SF82|PTHR24161
TRINITY_DN10069_c0_g1_i6	45.242	15.073	0	104.28	0	16.592	34.882	96.065	0	0	0	0	6.747	0	16.707	19.52	AT5G20350	Q52T38	PF12796|PF12796|PF13857	PTHR24161|PTHR24161:SF82
TRINITY_DN10069_c0_g1_i7	46.032	30.9	33.023	39.497	112.216	11.27	46.787	28.027	30.349	0	0	29.1	0	17.594	16.278	0	AT5G20350	Q52T38	PF13857|PF12796|PF12796	PTHR24161:SF82|PTHR24161
TRINITY_DN10069_c1_g1_i1	681.595	795.859	722.253	1275.29	1126.47	753.279	1261.8	990.043	787.007	652.441	715.2	892.916	827.759	630.153	706.209	664.721	AT2G27450	Q8VYF5	PF00795	PTHR43674:SF6|PTHR43674
TRINITY_DN10069_c1_g1_i6	142.552	144.142	182.115	410.708	251.054	216.879	329.212	349.971	45.995	18.559	47.8	35.839	4.241	5.847	11.787	16.279	AT2G27450	Q8VYF5	PF00795	PTHR43674|PTHR43674:SF6
TRINITY_DN10069_c2_g2_i1	40	42	23	17	10	75.997	51	14	3	33	6	0	2	0	2	3	AT5G25160	Q39262		PTHR47287:SF1|PTHR47287
TRINITY_DN1006_c0_g1_i2	120.813	184.195	88.765	227.89	265.339	113.841	174.525	116.336	111.904	38.065	79.592	47.771	16.039	57.581	42.253	87.591	AT5G58450	F4KEY9	PF09797	PTHR22767|PTHR22767:SF3
TRINITY_DN1006_c0_g1_i3	0	0	0	0	0	0	0	0	0	0	0	0	0	0	0	0	AT5G58450	F4KEY9	PF09797	PTHR22767|PTHR22767:SF3
TRINITY_DN1006_c0_g1_i7	651.4	797.901	573.995	1205.03	1071.66	660.179	1073.93	915.857	540.238	375.037	449.408	367.236	315.961	483.419	343.747	375.409	AT5G58450	F4KEY9	PF09797	PTHR22767|PTHR22767:SF3
TRINITY_DN100701_c0_g1_i1	0	0	0	0	0	0	0	3	0	0	1	0	0	0	0	0		Q8P778	PF00436
TRINITY_DN10070_c0_g1_i2	7.425	0	0	0	0	0	0	0	0	0	0	3.399	9.212	12.053	0	0	AT2G19860	Q9SEK2	PF00349|PF03727	PTHR19443|PTHR19443:SF62
TRINITY_DN10070_c0_g1_i3	1.674	13.171	0	0	7.832	1.152	0	0	2.535	1.14	1.141	0	1.276	1.312	0	0	AT2G19860	P93834	PF03727|PF00349	PTHR19443:SF62|PTHR19443
TRINITY_DN10070_c0_g1_i4	0	50.145	0	0	0	0	0	0	0	0	0	0	0	0	0	0	AT2G19860	Q9SEK2	PF03727|PF00349	PTHR19443|PTHR19443:SF62
TRINITY_DN10070_c0_g1_i8	6.601	12.781	0	0	0	0	0	0	0	10.537	0	0	0	1	0	4.331	AT2G19860	Q9SEK3	PF03727	PTHR19443:SF62|PTHR19443
TRINITY_DN10070_c0_g2_i1	0	10.557	0	0	0	2.626	0	0	0	0	0	0	0	0	0	0	AT2G19860	Q9SEK2	PF00349|PF03727	PTHR19443:SF62|PTHR19443
TRINITY_DN10070_c0_g2_i3	4.877	0	0	3.155	0	11.347	0	3.144	6	0	4	4.187	0	0	1	0	AT2G19860	Q9SEK2	PF03727|PF00349	PTHR19443:SF62|PTHR19443
TRINITY_DN10070_c0_g2_i5	73.424	155.346	16	33.845	16.168	82.874	27	17.143	15.465	67.324	12.859	14.415	34.512	46.635	11	20.669	AT2G19860	Q9SEK2	PF00349|PF03727	PTHR19443|PTHR19443:SF62
TRINITY_DN10070_c1_g1_i1	20.229	36.331	0	0	0	3.541	0	0	0	9.381	0	0	10.179	0	0	0	AT5G08540			PTHR36793:SF1|PTHR36793
TRINITY_DN10070_c1_g1_i2	0	13.462	3.402	10.924	56.379	28.677	30.307	20.498	9.454	0	0	6.176	0	10.667	5.119	32.625	AT5G08540			PTHR36793|PTHR36793:SF1
TRINITY_DN10070_c1_g1_i3	0	0	27.274	52.366	0	0	31.168	24.984	17.75	5.326	32.545	9.379	0	0	17.005	0	AT5G08540			PTHR36793|PTHR36793:SF1
TRINITY_DN10070_c1_g1_i4	344.689	913.831	223.324	464.711	527.621	287.784	388.5	399.518	290.795	337.293	319.455	294.445	1009.99	688.458	316.876	438.375	AT5G08540			PTHR36793
TRINITY_DN100717_c0_g1_i1	0	0	0	0	0	0	0	0	0	0	0	0	0	0	0	0
TRINITY_DN100717_c0_g3_i1	0	0	0	0	0	0	0	2	0	0	0	0	0	0	0	1
TRINITY_DN10071_c0_g1_i1	347.985	623.102	359	712	634.01	341.506	883.543	679.413	286.666	182.978	214	191	204	163	250	276	AT3G10400	Q9CAE4	PF00076|PF00098	PTHR46259|PTHR46259:SF1
TRINITY_DN10071_c0_g2_i1	34	44	38	65	54	24	42	38	15	27	18	4	9	21	3	12	AT3G10400	Q9CAE4	PF00098	PTHR46259
TRINITY_DN10071_c1_g1_i13	853.451	1123.17	786.273	2254.95	1080.84	824.777	1966.79	1688.63	248.487	295.364	343.758	318.408	249.997	444.005	342.652	483.262	AT3G24800	Q8LBL5	PF13445|PF00569	PTHR15898|PTHR15898:SF15
TRINITY_DN10071_c1_g1_i7	39.116	168.214	69.154	195.5	150.523	101.368	156.729	218.803	470.856	365.711	355.853	435.099	541.934	595.978	252.712	320.012	AT3G24800	Q8LBL5	PF13445|PF00569	PTHR15898|PTHR15898:SF15
TRINITY_DN10071_c1_g1_i8	203.433	161.616	155.573	335.565	360.633	167.855	374.249	380.945	227.657	98.924	156.4	123.493	63.07	109.018	103.636	72.726	AT3G24800	Q8LBL5	PF13445|PF00569	PTHR15898:SF15|PTHR15898
TRINITY_DN10072_c0_g1_i10	304.118	593.961	611.035	1316.77	2034.45	621.451	1414.19	1494.46	674.438	378.877	575.019	722.167	1214.86	867.929	597.022	1110.78	AT2G31200	Q9ZSK2	PF00241	PTHR11913|PTHR11913:SF96
TRINITY_DN10072_c0_g1_i12	7.2	27.997	1	0	0	40.919	10	1.939	16.443	10.651	2	4.271	20.434	13.06	4	5.13	AT2G38940	Q494P0	PF00083	PTHR24064|PTHR24064:SF508
TRINITY_DN10072_c0_g1_i13	41.792	49.167	32.447	61.41	86.572	67.567	64	60.536	30.557	32.061	18.852	15.726	116.102	34.506	21	46.87	AT3G54700	Q494P0	PF00083	PTHR24064|PTHR24064:SF508
TRINITY_DN10072_c0_g1_i5	742.993	919.515	1402.82	2473.53	2646.02	1635.72	2096.24	2368.15	2020.09	2139.49	1975	1695.01	1969	1204	1684	2409	AT2G31200	Q8SAG3	PF00241	PTHR11913|PTHR11913:SF83
TRINITY_DN10072_c0_g1_i8	63.89	38.882	43.79	96.405	139.013	78.111	79.132	107.211	27.562	14.411	26.129	8.836	38.609	34.505	12.978	33.219	AT2G31200	Q9ZSK2	PF00241	PTHR11913|PTHR11913:SF83
TRINITY_DN10072_c1_g1_i1	1245.3	2579.73	1916.39	3709.9	3871.79	1689.68	2635.64	4221.38	2643.88	3626.31	2946	3286.95	4320.26	3405.98	2678	2924	AT5G13510	O80362	PF00466	PTHR11560
TRINITY_DN100747_c0_g1_i2	16	11	8	8	16	10	1	10	3	3	5	7	7	9	5	7	AT1G15890	Q9LMP6
TRINITY_DN10074_c0_g1_i11	17.749	28.64	26.978	18.453	32.718	14.51	7.689	36.595	3.109	0	6.736	7.438	0	5.953	5.608	2.959	AT2G23890	Q75K12	PF05761	PTHR12103|PTHR12103:SF12
TRINITY_DN10074_c0_g1_i12	47.182	49.537	5.896	23.627	32.429	4.433	6.124	27.42	8.41	5.776	7.263	0	16.765	0	8.691	0	AT2G23890	Q75K12	PF05761	PTHR12103:SF12|PTHR12103
TRINITY_DN10074_c0_g1_i2	0	16.545	0	10.994	0	2.363	0	1.896	0	0	0	0	0	0	0	0	AT2G23890	Q75K12	PF05761	PTHR12103|PTHR12103:SF12
TRINITY_DN10074_c0_g1_i4	236.535	228.274	245.126	498.927	350.853	293.693	432.021	379.089	290.481	245.224	203.001	222.562	113.235	125.745	126.701	172.192	AT2G23890	Q75K12	PF05761	PTHR12103:SF12|PTHR12103
TRINITY_DN10074_c0_g1_i5	2.535	0	0	0	0	0	0	0	0	0	0	0	0	3.302	0	8.849	AT2G23890	Q75K12	PF05761	PTHR12103|PTHR12103:SF12
TRINITY_DN10075_c0_g1_i4	1	2	0	1	0	1	0	0	2	0	3	10	5	1	2	40	AT5G18840	Q8LBI9	PF00083	PTHR48021:SF37|PTHR48021
TRINITY_DN10076_c0_g1_i2	414.179	728.726	409.778	712.434	700.661	518.859	678.792	713.641	594	531	487.232	523	602	518	450	626	AT5G13470			PTHR33912|PTHR33912:SF3
TRINITY_DN10076_c0_g1_i3	220.811	450.274	254.222	397.57	401.339	320.141	462.444	417.653	0	0	0	0	0	0	0	0	AT5G13470			PTHR33912:SF3|PTHR33912
TRINITY_DN10077_c0_g1_i1	22	57	35	54	30	25	23	58.874	52	29	42	51	32	29	35	25	AT1G24095	P40761	PF04134	PTHR33639|PTHR33639:SF1
TRINITY_DN100796_c0_g1_i1	0	0	0	0	0	0	0	0	0	0	0	0	0	0	0	0		P87049	PF08613	PTHR15615:SF36|PTHR15615
TRINITY_DN10079_c0_g1_i14	23.407	84.459	10.546	30.652	9.147	26.544	22	17.401	0	4.62	4.538	4	4.854	0	1.135	4	AT1G15420			PTHR42968:SF14|PTHR42968
TRINITY_DN10079_c0_g1_i7	6.593	29.541	9.454	7.348	21.853	6.456	0	10.599	4	2.38	3.462	0	4.146	4	3.865	0				PTHR42968|PTHR42968:SF14
TRINITY_DN1007_c0_g1_i5	23.269	64.407	0	21.698	3.645	18.149	13.438	11.346	3.822	0	0	11.937	4.264	42.921	0	5.69	AT4G13420	Q9M7K4	PF02705	PTHR30540:SF99|PTHR30540
TRINITY_DN1007_c0_g1_i6	1546.8	987.601	82	362.303	167.355	815.778	292.562	82.654	355.178	89	28	136.063	351.736	985.079	120	662.622	AT4G13420	Q9M7K4	PF02705	PTHR30540|PTHR30540:SF99
TRINITY_DN100811_c0_g1_i2	0	0	1	0	0	0	3	6	1	0	1	0	0	0	1	10	AT1G13180	P78712	PF00022	PTHR11937|PTHR11937:SF175
TRINITY_DN100824_c0_g2_i2	25	44	43	37	12	21	12	10	4.99	4.951	7	5.985	7	3.913	5.994	4.986
TRINITY_DN10082_c0_g1_i1	0	91.988	123.389	85.252	319.873	0	24.97	195.448	174.779	174.146	194.319	268.033	205.995	117.056	130.156	175.132	AT3G17810	Q9LVI9	PF01180	PTHR43073:SF3|PTHR43073
TRINITY_DN10082_c0_g1_i12	301.501	513.772	309.333	621.121	516.83	434.585	871.199	482.333	404.154	364.291	293.693	357.852	330.328	292.871	387.82	1240.99	AT3G17810	Q9LVI9	PF01180	PTHR43073:SF3|PTHR43073
TRINITY_DN10082_c0_g1_i5	141.342	138.877	78.19	182.063	125.999	160.793	342.686	141.852	225.295	171.287	156.059	172.175	157.341	147.141	233.927	1461.67	AT3G17810	Q9LVI9	PF01180	PTHR43073:SF3|PTHR43073
TRINITY_DN10082_c0_g1_i6	148.276	7.098	0	92.615	22.974	108.562	6.868	0	0	0	0	0	0	100.017	42.588	0	AT3G17810	Q9LVI9	PF01180	PTHR43073|PTHR43073:SF3
TRINITY_DN10082_c0_g1_i8	11.819	9.842	7.869	0	6.35	5.415	6.081	0	13.653	9.077	6.303	16.602	17.4	2.438	20.558	109.311	AT3G17810	Q9LVI9	PF01180	PTHR43073:SF3|PTHR43073
TRINITY_DN10082_c0_g1_i9	232.142	388.801	375.219	609.286	497.801	247.645	503.792	552.915	64.119	69.199	54.626	64.339	57.328	66.477	62.953	64.899	AT3G17810	Q9LVI9	PF01180	PTHR43073|PTHR43073:SF3
TRINITY_DN100836_c0_g1_i5	17	27	4	7	9	11	3	16	34	32	31	42	24	32	27	31
TRINITY_DN10083_c0_g1_i1	459.158	940.324	505.69	612.285	352.404	394.514	518.915	418.731	271.58	496.569	716.204	649.67	1234.41	1286.86	632.578	444.809	AT5G55220	Q8S9L5	PF05698|PF05697	PTHR30560|PTHR30560:SF3
TRINITY_DN10083_c0_g1_i12	93.076	126.537	42.887	108.144	133.017	37.511	0	134.025	0	0	0	26.872	0	0	0	0	AT5G55220	Q8S9L5	PF05697	PTHR30560:SF3|PTHR30560
TRINITY_DN10083_c0_g1_i2	11.805	23.811	20.962	44.302	8.365	13.451	43.017	13.678	24.325	6.703	67.762	19.595	4.394	31.415	18.869	13.556	AT5G55220	Q8S9L5	PF05697	PTHR30560|PTHR30560:SF3
TRINITY_DN10083_c0_g1_i4	0	0	0	0	0	0	0	0	0	0	0	0	0	0	0	0	AT5G55220	Q8S9L5	PF05698	PTHR30560|PTHR30560:SF3
TRINITY_DN10083_c0_g1_i7	78.256	313.811	21.122	286.92	202.655	26.467	198.097	123.876	162.76	0	229.793	94.417	257.223	388.994	212.756	175.435	AT5G55220	Q8S9L5	PF05698	PTHR30560|PTHR30560:SF3
TRINITY_DN10083_c0_g1_i8	0	0	0	0	0	0	0	0	17.74	0	0	0	33.36	76.931	33.495	17.281	AT5G55220	Q8S9L5		PTHR30560|PTHR30560:SF3
TRINITY_DN10083_c0_g1_i9	151.704	378.19	148.37	424.184	227.558	38.058	250.767	263.391	93.594	15.067	123.723	67.446	57.861	204.797	148.51	90.919	AT5G55220	Q8S9L5	PF05697|PF05698	PTHR30560:SF3|PTHR30560
TRINITY_DN10085_c0_g1_i12	80.276	84.052	40.607	76.928	59.094	49.979	54.401	65.978	49.799	51.061	53.035	28.261	34.554	44.889	44.767	45.808	AT1G77130	Q8W4A7	PF01501	PTHR11183|PTHR11183:SF56
TRINITY_DN10085_c0_g1_i23	433.312	566.393	266.393	451.072	335.906	375.023	516.268	297.022	193.201	237.939	131.965	81.739	152.446	172.111	92.233	175.192	AT1G77130	Q8W4A7	PF01501	PTHR11183|PTHR11183:SF56
TRINITY_DN10086_c0_g1_i11	0	0	0	48.936	72.61	0	186.024	25.447	63.104	0	0	109.961	81.849	90.965	135.924	124.2	AT3G18670	Q9EP71	PF12796|PF13961|PF13962	PTHR24177:SF329|PTHR24177
TRINITY_DN10086_c0_g1_i2	22	12.098	53.623	127.109	80.343	28	82.277	117.792	49.668	48.963	59.598	0	0	27.527	58.128	45.208	AT5G04700	Q9EP71	PF12796|PF13961	PTHR23206:SF4|PTHR23206
TRINITY_DN10086_c0_g1_i3	0	24.859	4.377	0	0	0	0	1.761	0	0	0	0	0	0	0	0	AT5G04700	Q9EP71	PF13961|PF12796	PTHR23206|PTHR23206:SF4
TRINITY_DN10086_c0_g1_i5	0	18.043	0	0	4.11	0	1.826	0	44.36	59.037	36.402	59.039	35.151	54.509	37.948	41.592	AT3G18670	Q9EP71	PF12796|PF13961|PF13962	PTHR24177:SF329|PTHR24177
TRINITY_DN100870_c0_g1_i1	0	0	0	2	0	0	0	0	0	0	2	0	0	0	0	1		O13941	PF03935	PTHR31361:SF14|PTHR31361
TRINITY_DN10089_c0_g1_i1	7.002	6	1	4	0	85	3	2	2	8	0	0	0	0	1	8	AT4G20050	O49432	PF12708	PTHR33928:SF7|PTHR33928
TRINITY_DN10089_c0_g2_i2	2.422	2.825	0	0	0	2.625	0	0	0	0	0	0	0	1	1	0	AT4G20050	O49432		PTHR33928|PTHR33928:SF7
TRINITY_DN10089_c0_g2_i3	82.622	15.22	10	18	5	219.022	8	8	3	58	2	8	3	0	0	3	AT4G20050	O49432	PF12708	PTHR33928:SF7|PTHR33928
TRINITY_DN1008_c0_g1_i1	147.603	37.677	77	180.115	145.57	181.004	91.938	74	56.857	62	34	69.969	19.186	82.352	73.267	189.891	AT5G57050	Q0JLP9	PF00481	PTHR47992:SF8|PTHR47992
TRINITY_DN1008_c0_g1_i3	5.397	13.323	0	13.885	5.43	33	23.062	0	2.143	0	0	2.974	4.814	1.648	6.733	2.025	AT5G57050	O04719	PF00481	PTHR47992:SF41|PTHR47992
TRINITY_DN1008_c0_g1_i5	40.38	13.646	39.056	70.935	55.935	37.738	105.913	54.297	8.768	0	5.517	4.133	12.848	1.361	3.616	14.895	AT5G57050	O04719	PF00481	PTHR47992|PTHR47992:SF41
TRINITY_DN1008_c0_g1_i6	174.62	87.354	245.944	496.064	247.065	150.262	594.394	411.704	240.232	85	393.483	400.924	341.152	158.639	551.384	405.189	AT5G57050	O04719	PF00481	PTHR47992|PTHR47992:SF8
TRINITY_DN10090_c0_g1_i5	171.003	151	68.737	173	168	339.973	135.995	118	68	45	83.332	56.4	80.566	226.559	51.25	70.451
TRINITY_DN100929_c0_g1_i2	0	0	0	0	0	0	1	0	0	0	0	0	0	0	1	2			PF10528
TRINITY_DN10092_c0_g3_i4	4	4	0	21	12	6	8	2	24	14	10	19	55	84.001	59.997	43	AT4G23160	Q94HW2	PF07727	PTHR45895
TRINITY_DN100955_c0_g1_i2	0	0	4	0	0	0	0	95	2	0	7	0	0	0	1	4	AT1G12570	Q5GMY3	PF05199|PF00732	PTHR11552|PTHR11552:SF218
TRINITY_DN10095_c0_g1_i1	73	124	62	110	98	72	152.875	93	169	133	78	138	187	240	101	168	AT3G01360		PF04819	PTHR46285|PTHR46285:SF7
TRINITY_DN10097_c0_g1_i5	15.331	30	8	11	20.016	41	2.614	17	14.31	9.09	14.864	5.539	16	15.203	11.191	13.397	AT3G14240	Q9LUM3	PF05922	PTHR10795:SF676|PTHR10795
TRINITY_DN10097_c2_g1_i1	417.015	1686.33	157	96	103	545.97	37.001	116	91	491.005	145	33	43	22	15	52	AT5G67360	O65351	PF17766	PTHR10795:SF388|PTHR10795
TRINITY_DN10099_c0_g1_i1	589.758	1283.42	519.069	857.048	657.505	700.898	598.846	635.452	453.603	676.069	480.6	459.691	448.805	501.452	420.532	1002.09	AT1G13450	Q9FX53	PF13837	PTHR21654:SF54|PTHR21654
TRINITY_DN10099_c0_g1_i2	90.662	87.381	91.225	164.688	170.812	119.046	181.684	143.163	0	4.624	0	0	0	0	0	0	AT1G13450	Q9FX53	PF13837	PTHR21654:SF54|PTHR21654
TRINITY_DN10099_c0_g1_i3	322.774	491.412	311.706	618.276	464.684	374.035	577.456	437.359	384.397	388.307	316.69	350.309	495.195	607.548	363.48	832.911	AT1G13450	Q9FX53	PF13837	PTHR21654|PTHR21654:SF54
TRINITY_DN100_c0_g1_i1	472.215	495.359	239.476	414.076	363.141	276.979	405.59	491.401	210.277	195.177	249.193	126.078	33.435	85.373	201.356	130.897	AT5G08390	F4KB17	PF13925|PF00400|PF00400|PF00400|PF00400|PF00400	PTHR19845:SF0|PTHR19845
TRINITY_DN100_c0_g1_i6	408.791	556.836	647.524	898.924	655.81	505.111	524.866	471.087	382.939	513.823	377.507	412.922	226.57	308.627	139.644	290.103	AT5G23430	Q8H0T9	PF13925|PF00400|PF00400|PF00400|PF00400|PF00400	PTHR19845:SF0|PTHR19845
TRINITY_DN100_c1_g1_i2	39.48	38.841	16.241	29.743	13.201	25.367	12.413	34.318	15.059	16.71	17.108	12.814	4.388	10.719	2.207	7.381	AT1G11160	F4HTH8	PF13925	PTHR19845|PTHR19845:SF15
TRINITY_DN100_c1_g1_i3	233.807	381.588	307.662	545.057	344.743	272.993	380.027	516.543	303.532	152.723	199.925	136.302	70.289	152.411	106.464	144.342	AT1G11160	A0A1P8AW69	PF13925	PTHR19845:SF15|PTHR19845
TRINITY_DN100_c1_g1_i4	55.147	99.575	82.845	121.411	82.217	70.394	110.704	166.584	10.737	5.912	1.614	1.835	2.348	7.543	1.506	2.121
TRINITY_DN100_c1_g1_i8	40.148	63.996	24.487	66.078	28.84	33.286	41.3	53.555	68.493	21.688	34.353	44.049	14.974	38.327	28.823	17.156	AT1G11160
TRINITY_DN101000_c0_g1_i4	26	49	16	25	36	17	9	17	48	41	55	60	73	73	32	35
TRINITY_DN10100_c0_g1_i11	7.423	27.266	20.634	0	43.551	4.358	38.609	30.977	17.827	0	26.515	12.844	21.78	17.115	46.567	47.994	AT4G33170	Q9SIT7	PF13041|PF13041|PF13812|PF01535|PF01535|PF01535	PTHR24015:SF1725|PTHR24015
TRINITY_DN10100_c0_g1_i13	50.314	59.874	21.498	84.781	30.952	35.882	28.541	14.746	22.689	19.302	20.034	34.945	47.119	24.831	0	5.266	AT3G15130	Q9SIT7	PF01535|PF01535|PF01535|PF13041|PF13041|PF13812	PTHR24015:SF1725|PTHR24015
TRINITY_DN10100_c0_g1_i3	0	0	0	0	0	0	0	0	14.949	0	25.451	37.682	21.843	18.866	0	0	AT4G33170	Q9SMZ2	PF13041|PF13041|PF13812|PF01535|PF01535|PF01535	PTHR24015|PTHR24015:SF1725
TRINITY_DN10100_c0_g1_i8	0	4.219	0	0	0	0	0	0	0	0	0	0	0	0	0	0	AT4G33170	Q9SIT7	PF01535|PF01535|PF01535|PF13041|PF13041|PF13812	PTHR24015:SF1725|PTHR24015
TRINITY_DN10100_c0_g1_i9	27.263	25.641	14.869	42.219	14.496	6.015	38.85	20.277	17.535	16.698	0	2.529	23.258	17.188	9.433	12.74	AT4G33170	Q9SIT7	PF13041|PF13041|PF01535|PF01535|PF01535|PF13812	PTHR24015:SF1725|PTHR24015
TRINITY_DN10101_c0_g1_i2	16	28	0	0	0	8	0	0	0	2	0	0	0	1	0	0	AT1G70090	O04536		PTHR13778|PTHR13778:SF43
TRINITY_DN10101_c0_g1_i3	698.873	534.153	62	199.98	85	565	408.136	104.043	92	98	29	96	82	155	27	274	AT1G70090	O04536	PF01501	PTHR13778|PTHR13778:SF40
TRINITY_DN101029_c0_g1_i1	3	3.894	0	0	0	0	0	0	4.372	4	6.897	2.236	3.877	16.645	6	4	AT3G21110	P38025	PF01259	PTHR43700:SF3|PTHR43700
TRINITY_DN101029_c0_g1_i3	13	10.106	1	0	3	2	0	0	2.628	0	1.103	2.764	4.123	7.572	0	0	AT3G21110	P38025	PF01259	PTHR43700:SF3|PTHR43700
TRINITY_DN10102_c0_g1_i3	413.94	327.015	198.851	370.296	226.671	435.608	394.73	271.932	192.746	256.16	146.062	223.014	178.018	269.623	156.942	283.42	AT2G19770	Q9M7N0	PF00235	PTHR11604|PTHR11604:SF29
TRINITY_DN10102_c0_g1_i4	37.254	20.446	1.149	23.704	10.329	49.904	18.344	6.068	21.254	10.84	2.938	23.986	14.982	19.377	12.058	8.58	AT2G19770	Q9M7N0	PF00235	PTHR11604|PTHR11604:SF29
TRINITY_DN101048_c0_g1_i1	1	0	0	0	0	4	0	0	0	0	0	0	0	0	0	0	AT5G62180	Q0ZPV7	PF07859	PTHR23024:SF426|PTHR23024
TRINITY_DN10104_c0_g1_i13	44.955	19.736	95.252	45.688	32.13	59.892	36.28	123.674	28.306	9.783	8.856	6.385	3.927	33.975	0	0	AT1G67500	Q766Z3	PF03104|PF00136	PTHR45812
TRINITY_DN10104_c0_g1_i15	0	0	0	633.69	339.625	260.108	447.052	0.005	0	113.217	0	0	0	0	0	0	AT1G67500	Q766Z3	PF14260|PF03104|PF00136	PTHR45812
TRINITY_DN10104_c0_g1_i4	54.902	76.909	0	100.622	223.245	0	0	29.074	0	0	0	40.828	0	0	18.731	37.888	AT1G67500	Q766Z3	PF00136|PF03104	PTHR45812
TRINITY_DN10104_c0_g1_i8	256.193	243.355	309.749	0	0	0	0	340.247	220.694	0	167.144	158.787	71.073	70.025	138.269	155.112	AT1G67500	Q766Z3	PF14260|PF03104|PF00136	PTHR45812
TRINITY_DN101052_c0_g1_i1	0	0	0	0	0	0	0	5	0	0	1	0	0	0	0	2
TRINITY_DN101055_c0_g1_i1	0	0	0	0	0	0	0	0	1	0	2	0	0	0	4	0		Q9UUM7	PF03114	PTHR47174:SF3|PTHR47174
TRINITY_DN10105_c0_g1_i1	0	0	0	0	0	0	0	0	49.079	46.064	67.523	33.364	64.676	86.908	54.114	102.144	AT1G77550	Q3UDE2	PF03133	PTHR46088
TRINITY_DN10105_c0_g1_i11	28.014	19.135	0	17.924	7.618	21.736	4.303	12.223	9.962	2.281	10.618	3.971	7.371	14.975	2.209	19.812	AT1G77550	Q3UDE2	PF03133	PTHR46088
TRINITY_DN10105_c0_g1_i2	142.854	193.999	56.111	159.94	87.591	145.957	69.082	59.235	44.596	42.069	49.031	23.481	92.751	65.279	55.224	70.929	AT1G77550	Q3UDE2		PTHR46088
TRINITY_DN10105_c0_g1_i4	144.132	188.21	97.712	146.136	173.792	89.307	177.616	117.542	57.363	46.587	45.828	60.184	80.202	104.838	36.452	22.116	AT1G77550	Q3UDE2	PF03133	PTHR46088
TRINITY_DN101061_c0_g1_i3	0	0	0	4	0	0	6	1	0	0	1	0	0	0	0	0			PF04828	PTHR33337
TRINITY_DN10106_c0_g1_i11	7.392	2.25	3.615	8.645	24.724	6.965	8.799	6.193	51.071	42.523	45.737	37.689	29.681	63.594	33.491	79.744	AT1G78770	B3DNN5	PF13424	PTHR12558|PTHR12558:SF9
TRINITY_DN10106_c0_g1_i12	6.121	16.967	6.967	16.799	6.951	2.333	15.408	9.46	0	0	7.604	9.872	7.025	2.283	3.508	2.828	AT1G78770	B3DNN5	PF13424	PTHR12558:SF9|PTHR12558
TRINITY_DN10106_c0_g1_i13	3.792	0	0	6.951	0	0	0	0	71.191	0	54.041	80.364	28.421	71.705	55.884	37.94	AT1G78770	B3DNN5	PF13181	PTHR12558|PTHR12558:SF9
TRINITY_DN10106_c0_g1_i14	760.322	2420.01	367.496	674.29	573.339	764.132	651.447	524.466	252.918	373.713	247.837	280.416	302.546	245.991	257.389	361.125	AT1G68070	Q8GUU2	PF13639	PTHR45977:SF22|PTHR45977
TRINITY_DN10106_c0_g1_i16	0	0	0	0	0	0	0	0	0	0	0	0	0	0	0	0	AT1G78770	B3DNN5	PF13181|PF12895	PTHR12558|PTHR12558:SF9
TRINITY_DN10106_c0_g1_i17	173.843	129.687	208.151	413.234	357.964	131.243	348.593	342.907	249.86	150.616	239.492	225.441	135.191	165.634	189.853	259.316	AT1G78770	B3DNN5	PF13181|PF13424|PF12895	PTHR12558|PTHR12558:SF9
TRINITY_DN10106_c0_g1_i19	253.719	428.223	241.303	407.03	355.425	220.62	343.471	369.116	184.494	177.65	187.257	158.661	156.897	190.146	117.69	156.966	AT1G25210	F4IAW1	PF03331	PTHR33694
TRINITY_DN10106_c0_g1_i23	28.196	12.631	21.68	69.068	30.683	24.81	16.368	21.81	14.466	41.498	11.405	13.557	5.238	18.646	9.185	2.081	AT1G25210	F4IAW1	PF03331	PTHR33694
TRINITY_DN101073_c0_g1_i1	0	0	0	0	0	0	1	0	0	0	1	0	0	0	3	4		Q9USU9	PF03153|PF03153	PTHR12694:SF8|PTHR12694:SF8|PTHR12694|PTHR12694
TRINITY_DN10107_c0_g1_i5	151.861	74.421	154.463	282.314	186.079	161.188	282.138	170.456	6	0	0	0	1	4	5	8				PTHR33463:SF100|PTHR33463|PTHR33463|PTHR33463:SF100
TRINITY_DN10107_c0_g1_i7	26.139	38.579	2.537	32.686	18.921	12.812	7.862	52.544	0	1	0	2	0	0	0	0				PTHR33463:SF100|PTHR33463:SF100|PTHR33463|PTHR33463
TRINITY_DN10108_c0_g1_i1	0	0	41.305	45.348	12.942	1	101.122	137.672	0	0	1	2	0	0	3.183	4
TRINITY_DN10108_c0_g1_i8	0	0	21.695	40.652	11.058	0	98.878	85.334	0	0	2	0	0	0	4.817	0
TRINITY_DN101092_c0_g1_i1	0	0	0	0	0	0	0	0	0	0	0	0	0	0	0	0	AT2G42800	Q9SJH6	PF13855|PF13855	PTHR48054:SF4|PTHR48054
TRINITY_DN10109_c1_g1_i1	56	47	1	5	9	18	15	8	7	1	4	5	1	6	14	18	AT1G68460	Q5GHF7	PF01715|PF01715	PTHR11088:SF65|PTHR11088
TRINITY_DN1010_c0_g1_i1	49.963	79.302	10.46	41.34	35.93	56.357	35.97	48.607	8.957	4.304	12.984	4.205	0	7.677	5.253	0				PTHR34555|PTHR34555:SF1
TRINITY_DN1010_c0_g1_i11	105.105	160.493	67.746	82.037	83.84	64.51	60.619	39.597	26.076	12.387	13.097	15.937	7.352	22.814	16.296	19.498				PTHR34555:SF1|PTHR34555
TRINITY_DN1010_c0_g1_i19	239.079	308.219	166.847	328.623	273.316	151.422	168.411	201.759	30.708	14.089	27.844	18.889	16.436	49.382	13.274	23.716
TRINITY_DN1010_c0_g1_i23	13.853	0	2.947	0	11.915	2.711	0	4.142	12.258	1.221	9.074	5.969	1.212	7.126	5.176	3.786				PTHR34555|PTHR34555:SF1
TRINITY_DN10110_c0_g1_i1	93.395	40.577	69.642	119.305	102.222	25.806	112.155	65.095	0	0	0	0	0	0	0	0	AT1G01970	Q9LPC4	PF13812|PF01535|PF01535	PTHR46862:SF3|PTHR46862
TRINITY_DN10110_c0_g1_i2	0	84.445	33.705	91.334	94.45	76.551	93.291	150.206	148.031	116.588	168.526	185.532	358.11	213.228	115.52	178.849	AT1G01970	Q9LPC4	PF01535|PF01535|PF01535|PF01535	PTHR46862|PTHR46862:SF3
TRINITY_DN10110_c0_g1_i4	52.605	103.979	33.653	70.361	128.33	38.378	92.538	100.697	67.969	66.412	35.474	26.468	117.89	96.257	24.48	103.151	AT1G01970	Q9LPC4	PF01535|PF01535|PF01535|PF01535	PTHR46862:SF3|PTHR46862
TRINITY_DN10111_c0_g1_i1	330.372	479	568.617	1140	849.799	419.329	652.771	1021.02	439	1252.98	664	628	768.156	475	481	398			PF11493	PTHR36370:SF1|PTHR36370
TRINITY_DN10114_c0_g1_i1	61.446	102.207	39.45	100.225	76.007	49.98	88.196	115.277	1.706	1.569	13.44	9.273	1.753	12.61	4.141	10.955	AT5G41760	Q654D9	PF04142	PTHR10231:SF43|PTHR10231
TRINITY_DN10114_c0_g1_i10	0	39.77	0	0	0	0	9.237	0	0	0	0	0	0	0	0	0	AT5G41760	Q654D9	PF04142	PTHR10231|PTHR10231:SF43
TRINITY_DN10114_c0_g1_i13	44.8	145.686	11	3	3	64.215	1.285	7	4.073	18.122	2.064	2.063	3.131	0	0	1.017	AT5G41760	Q8LGE9	PF04142	PTHR10231:SF43|PTHR10231
TRINITY_DN10114_c0_g1_i4	232.754	367.832	207.609	356.775	311.997	243.806	292.282	254.877	351.221	326.386	258.497	293.663	383.116	311.39	195.859	233.028	AT5G41760	Q8LGE9	PF04142	PTHR10231:SF43|PTHR10231
TRINITY_DN101158_c0_g1_i5	0	0	0	0	0	0	3	20	1	0	0	2	0	0	4	7		Q9UTR6	PF04488	PTHR31834:SF8|PTHR31834
TRINITY_DN101167_c0_g1_i2	0	0	4	0	0	0	3	13	1	0	0	0	1	0	2	11		P24919		PTHR12653|PTHR12653:SF0
TRINITY_DN10116_c0_g1_i10	2.311	2.521	0.5	2.286	0	6.179	11.876	1.199	15.138	9.186	6.399	0	10.95	2.087	2.269	19.858		Q84JS6
TRINITY_DN10116_c0_g1_i3	22.689	6.479	4	12.714	7	13.336	18.124	8.603	17.718	19.873	10.274	5.936	24.312	8.174	17.774	16.94		Q84JS6
TRINITY_DN10116_c0_g1_i8	0	0	0.5	0	0	3.484	0	1.199	15.143	5.941	10.327	17.064	4.738	6.738	28.957	2.201		Q84JS6
TRINITY_DN10119_c0_g4_i1	201	57	1	170	47	102	244.089	33	293	6	11	101	50	109	125	83			PF14009	PTHR33052|PTHR33052:SF83
TRINITY_DN1011_c0_g1_i1	306.847	388.63	283.191	509.555	464.729	231.593	256.573	421.519	220.227	154.324	206.154	142.174	128.057	220.704	112.777	101.487	AT3G45740	Q9BXW7	PF13344	PTHR14269|PTHR14269:SF41
TRINITY_DN1011_c0_g1_i7	66.179	78.773	38.758	99.825	51.329	46.49	37.435	49.027	20.588	11.794	13.881	12.58	1.402	6.17	6.835	17.599	AT3G45740
TRINITY_DN1011_c0_g1_i8	63.993	82.636	45.688	164.566	98.907	71.395	71.526	79.292	0	0	0	0	0	0	0	0	AT3G45740	O13899	PF13242	PTHR14269|PTHR14269:SF41
TRINITY_DN1011_c0_g1_i9	30.981	103.015	42.362	40.679	67.035	34.523	82.932	127.161	20.302	32.883	41.964	16.246	11.541	26.126	16.387	4.915	AT3G45740	O13899	PF13242	PTHR14269:SF41|PTHR14269
TRINITY_DN1011_c1_g1_i3	153	499.998	37	79	40	34	56	51	55.002	33	28	57.102	24	35	29	34	AT5G14450	Q9LIN2	PF00657	PTHR22835:SF510|PTHR22835
TRINITY_DN10120_c0_g1_i1	0	3	0	0	3	0	0	0	1	0	0	0	0	1	0	0	AT3G11170	P48619	PF00487|PF11960	PTHR32100|PTHR32100:SF52
TRINITY_DN10120_c0_g2_i2	53.328	82.969	0	1	0	53.529	0	0	0	10.44	0	3	0	0	3	1	AT5G05580	P48624	PF11960|PF00487	PTHR32100|PTHR32100:SF52
TRINITY_DN10120_c0_g2_i3	0	6.499	0	0	1.628	10.084	0	0	0	0	0	0	0	0	0	0	AT5G05580	P48620	PF11960|PF00487	PTHR32100|PTHR32100:SF52
TRINITY_DN10120_c0_g2_i4	10.89	0	0	0	2.372	0	1	0	0	0	0	0	0	0	0	0	AT3G11170	P48619	PF11960	PTHR32100|PTHR32100:SF52
TRINITY_DN10120_c0_g2_i5	1.909	14.534	0	0	0	2.149	0	1	0	0	0	0	0	0	0	0	AT3G11170	P48619	PF11960|PF00487	PTHR32100|PTHR32100:SF52
TRINITY_DN10120_c0_g2_i6	43.865	64.999	0	0	0	26.23	0	0	3	12.56	2	0	0	0	0	0	AT5G05580	P48619	PF11960|PF00487	PTHR32100:SF52|PTHR32100
TRINITY_DN101249_c0_g1_i1	0	0	0	0	1	0	1	0	0	0	0	0	0	0	0	0		Q93CA6	PF07364
TRINITY_DN101249_c0_g2_i1	1	1	1	0	0	1	0	0	0	0	0	0	0	0	0	0		Q93CA6	PF07364|PF07171
TRINITY_DN101251_c0_g1_i1	4	2	4	0	5	0	21	1	0	0	2	0	0	0	0	0
TRINITY_DN101260_c0_g2_i1	3	0	1	1	3	0	2	1	0	0	0	0	0	0	0	0		Q07598	PF02803|PF00108	PTHR18919|PTHR18919:SF83
TRINITY_DN10126_c0_g1_i2	172.386	198.171	175.739	461.007	212.835	165.871	234.346	443.681	238.031	208.931	223.279	303.219	390.613	251.015	134.397	316.991	AT1G34360	Q6NLP2	PF05198|PF00707	PTHR10938:SF4|PTHR10938:SF4|PTHR10938|PTHR10938
TRINITY_DN10126_c0_g2_i7	168.606	324.971	221.259	391.705	267.165	201.114	278.654	426.55	220.969	238.069	202.721	216.781	373.387	356.985	183.603	312.009	AT1G34360	Q6NLP2	PF05198|PF00707	PTHR10938|PTHR10938:SF4|PTHR10938:SF4|PTHR10938
TRINITY_DN10127_c0_g1_i1	40	24	23.483	10	13	13	5	12	23	172	30	11	0	3	23	13	AT1G48780			PTHR36757
TRINITY_DN10127_c0_g1_i2	0	0	2.517	0	0	0	0	0	0	0	0	0	21	0	0	0	AT1G48780			PTHR36757
TRINITY_DN10127_c0_g2_i1	83	25	162	279.367	153	68	71	218	585	359	228	192	101	41	54	47	AT1G48780			PTHR36757
TRINITY_DN10128_c0_g1_i2	1000	1085.86	1778.63	2983	2644	1057.26	2614.17	3243.1	1523	1368.49	1663	1714	2063	1718	1030	1262			PF02151|PF02151	PTHR47191
TRINITY_DN1012_c0_g1_i1	244	571.888	119	229	279	210	341	202	145.996	90	119.002	120	458.338	306.001	167	271	AT4G28510	Q9ZNT7	PF01145	PTHR23222|PTHR23222:SF13
TRINITY_DN1012_c0_g1_i7	462	1422.38	122	234	269	248	422	191	247.004	207	208.998	249	839.665	476.999	290.116	380	AT1G03860	Q9ZNT7	PF01145	PTHR23222|PTHR23222:SF13
TRINITY_DN10130_c0_g1_i3	301.078	689	166.99	97.069	79	141	524.894	138	182	678	97	85	203	82	49	187	AT4G01470	O82598	PF00230	PTHR45665:SF32|PTHR45665
TRINITY_DN10130_c0_g2_i1	36.761	95	38.408	188.639	321.716	158.962	111.052	101.837	57	66	72.467	49	239	137	97.685	71	AT3G16240	Q41951	PF00230	PTHR45665|PTHR45665:SF41
TRINITY_DN10130_c0_g2_i2	1.239	0	3.592	6.943	5.283	4.038	0	1.163	0	0	2.533	0	0	0	1.315	0	AT3G16240	Q41951	PF00230	PTHR45665|PTHR45665:SF41
TRINITY_DN101321_c0_g1_i1	0	0	0	0	0	0	4	1	2	0	0	0	0	0	0	0		A0A2G5I8W0		PTHR34598
TRINITY_DN101357_c0_g1_i1	0	0	0	0	0	0	0	0	0	0	0	0	0	0	0	0			PF12697	PTHR43139|PTHR43139:SF50
TRINITY_DN101368_c0_g1_i4	0	3	0	0	0	0	0	0	0	0	0	0	0	0	0	0		Q9P8P4	PF01735	PTHR10728|PTHR10728:SF33
TRINITY_DN10137_c0_g1_i4	92.575	147.001	41.27	88.299	89.622	46.888	138.114	106.778	54.188	32.501	52.875	60.078	116.956	146.621	96.673	126.914	AT1G16970	Q9FQ08	PF02735|PF03731	PTHR12604|PTHR12604:SF2
TRINITY_DN10137_c0_g1_i5	2.365	6.325	2.73	16.46	9.853	4.445	20.319	20.156	2.914	0	1.665	0	7.09	23.242	3.28	18.836	AT1G16970	Q9FQ08
TRINITY_DN10137_c0_g1_i8	14.629	58.674	0	23.241	18.525	7.667	30.567	18.066	29.898	5.499	7.46	19.922	28.954	22.138	20.047	16.25	AT1G16970	Q7F1M0	PF02735|PF02037|PF03730	PTHR12604:SF2|PTHR12604
TRINITY_DN101382_c0_g2_i1	0	1	0	8	2	2	1	3	0	0	0	0	0	0	0	0			PF07366	PTHR38436
TRINITY_DN10138_c0_g1_i1	30.398	107.442	12.9	42.711	38.692	13.39	41.332	25.227	32.507	24.677	16.268	17.621	27.73	45.302	21.65	64.918	AT2G41710	Q8GWK2	PF00847	PTHR32467|PTHR32467:SF138
TRINITY_DN10138_c0_g1_i11	83.721	162.564	85.329	267.621	108.528	76.365	320.207	141.261	90.356	8.219	24.719	82.795	29.522	51.876	35.769	94.004	AT2G41710	Q8GWK2		PTHR32467|PTHR32467:SF138
TRINITY_DN10138_c0_g1_i15	18.911	56.728	0	1.48	6.707	0	0	0	0	0	0	0	0	9.017	0	5.93	AT2G41710	Q8GWK2		PTHR32467|PTHR32467:SF138
TRINITY_DN10138_c0_g1_i2	0	58.799	1.324	7.897	1.55	9.211	2.156	3.147	2.256	0	0	1.708	0	30.386	4.2	0	AT2G41710	Q8GWK2		PTHR32467|PTHR32467:SF138
TRINITY_DN10138_c0_g1_i3	26.155	67.115	73.412	175.904	106.233	50.468	80.191	80.98	56.881	13.067	30.16	67.876	8.116	28.363	47.381	27.636	AT2G41710	Q8GWK2	PF00847	PTHR32467|PTHR32467:SF138
TRINITY_DN10138_c0_g1_i5	36.815	28.324	49.034	38.388	65.289	39.567	68.448	29.385	0	51.037	33.853	0	37.549	27.056	0	38.512	AT2G41690	O22230	PF00447	PTHR10015:SF285|PTHR10015
TRINITY_DN10138_c0_g2_i1	17	12	12	45	15	8	222	47	32	4	4	5	11	66	6	56	AT2G41690	O22230	PF00447	PTHR10015:SF285|PTHR10015
TRINITY_DN10138_c1_g1_i1	2	9	0	0	0	2	0	0	1	0	0	2	1.001	0	1	1	AT1G09580	Q6IDL4	PF01105	PTHR22811|PTHR22811:SF127
TRINITY_DN10138_c1_g2_i1	410.702	479.868	187	409.157	322	365.096	513	336	138.382	227.131	126.579	116.226	193.18	143.243	117.285	162.221	AT1G09580	Q6IDL4	PF01105	PTHR22811:SF127|PTHR22811
TRINITY_DN10138_c1_g2_i2	2.312	0	0	2.843	0	0	0	0	175.618	192.869	98.421	126.774	244.819	227.757	108.728	246.779	AT1G09580	Q6IDL4	PF01105	PTHR22811:SF127|PTHR22811
TRINITY_DN1013_c0_g1_i2	601.061	813.668	385.644	785.384	706.664	590.62	702.017	660.752	514.174	532.021	365.112	460.541	622.336	402.164	381.903	482.079	AT5G67500	Q9FJX3	PF01459	PTHR11743|PTHR11743:SF53
TRINITY_DN1013_c0_g1_i4	436.559	650.308	297.198	685.179	564.61	434.391	624.65	633.942	467.389	438.785	382.245	396.221	336.526	375.7	296.297	503.124	AT5G67500	Q9FJX3	PF01459	PTHR11743:SF53|PTHR11743
TRINITY_DN1013_c0_g1_i8	41.379	90.024	62.158	106.438	127.725	33.16	117.755	123.306	142.437	123.194	178.61	182.237	134.138	164.135	51.8	166.797	AT5G67500	Q9FJX3	PF01459	PTHR11743|PTHR11743:SF53
TRINITY_DN1013_c1_g1_i1	377.34	468.265	496	754.064	519	360	698.487	678	536	466	622	501	438	321	346	406	AT3G51470	Q9SD02	PF00481	PTHR13832:SF641|PTHR13832
TRINITY_DN10140_c0_g1_i2	0	9.055	0	0	3.34	1.766	0	10.907	0	0	0	0	1.665	0	0	0	AT3G01280	P42056	PF01459	PTHR11743:SF35|PTHR11743
TRINITY_DN10140_c0_g1_i3	3.856	7.936	2.717	2	13.611	15.351	2	25.726	0	0	0	0	2.335	0	0	0	AT3G01280	P42056	PF01459	PTHR11743:SF35|PTHR11743
TRINITY_DN10140_c0_g1_i4	0	0	0	0	0	0	0	24.366	0	3.594	0	0	0	0	0	0	AT3G01280	P42056	PF01459	PTHR11743:SF35|PTHR11743
TRINITY_DN10140_c0_g1_i6	1.957	7.009	1.283	0	2.049	1.883	2	0	0	6.406	0	1	0	0	0	1	AT3G01280	P42056	PF01459	PTHR11743:SF35|PTHR11743
TRINITY_DN101411_c0_g1_i4	31.621	115.593	12.276	30.1	21.53	48.896	16.709	22.425	164.447	433.744	250.515	243.896	490.486	237.222	233.986	207.072	AT1G29930	P12471		PTHR21649|PTHR21649:SF97
TRINITY_DN10142_c1_g1_i1	0	0	5.888	0	0	0	24.816	86.281	1.776	0	1.497	0	0	0	2.301	2
TRINITY_DN10142_c1_g1_i2	1	0	1.112	0	0	0	17.184	76.719	4.224	0	1.503	0	0	0	4.699	0
TRINITY_DN101431_c0_g2_i1	0	0	0	3	0	0	0	0	0	0	1	1	0	0	0	0	AT3G12915	Q96X45	PF00679	PTHR42908|PTHR42908:SF28
TRINITY_DN101431_c0_g2_i3	0	0	0	0	0	0	0	2	0	0	0	0	0	0	0	2	AT3G12915	Q96X45	PF00679	PTHR42908|PTHR42908:SF28
TRINITY_DN101438_c0_g1_i2	0	2	9	2	3	0	8	8	0	2	0	0	0	0	0	0	AT1G03475	P11353	PF01218	PTHR10755|PTHR10755:SF0
TRINITY_DN101443_c0_g1_i1	153.123	369.23	129.472	99.202	36.778	16.633	417.613	57.496	150.181	97.139	248.54	72.901	2065.32	48.159	75	100.055	AT3G62760	Q9LZI9	PF00043|PF02798	PTHR43900|PTHR43900:SF72
TRINITY_DN101443_c0_g1_i2	12.877	33.77	13.528	16.798	11.222	1.367	54.671	15.504	17.819	1.861	11.46	4.099	28.712	1.841	0	1.945	AT3G62760	Q9LZI9	PF00043	PTHR43900:SF72|PTHR43900
TRINITY_DN101454_c0_g1_i16	222	289	299	414	466	249.963	410.393	393	283	244.977	188	195	240	260	148	127	AT2G48030		PF03372	PTHR14859:SF10|PTHR14859
TRINITY_DN10145_c0_g1_i1	0	181.867	2	0	0	5.317	0	0	0	0	0	0	2.5	0	0	0	AT3G22780	Q9LUI3	PF03638|PF03638	PTHR46159:SF15|PTHR46159
TRINITY_DN10145_c0_g1_i2	0	0	2	0	0	5.317	0	0	0	0	0	0	2.5	0	0	0	AT4G14770	Q9LUI3	PF03638|PF03638	PTHR46159:SF15|PTHR46159
TRINITY_DN10145_c0_g1_i6	23	82.133	0	14	31	3.366	14	17	8	10	11	13	0	6	7	7	AT4G14770	F4JIF5	PF03638|PF03638	PTHR46159:SF15|PTHR46159
TRINITY_DN10145_c1_g1_i1	302	335.945	320.412	348	187	274.906	146	171	265	320	248	235	121	136	164	147	AT3G10910	Q9SG96	PF13639	PTHR45798:SF44|PTHR45798
TRINITY_DN10146_c0_g1_i1	12.883	7.2	0	0	0	19.342	0	0	0	0	0	0	0	0	0	0	AT5G41470			PTHR33698|PTHR33698:SF1
TRINITY_DN10146_c0_g1_i4	8.117	8.8	2	2	2	91.658	0	0	21	26	12	17	33	44	17	5	AT5G41470			PTHR33698|PTHR33698:SF1
TRINITY_DN10147_c0_g1_i1	13	8	18	22	19	16	11	16	12	8	12	5	10	11	15	7			PF03478	PTHR33127|PTHR33127:SF35
TRINITY_DN101486_c0_g1_i1	0	0	0	0	0	0	5	1	0	0	0	0	0	0	0	1		Q10088	PF00491	PTHR11358:SF30|PTHR11358
TRINITY_DN101487_c0_g1_i1	1	3	0	0	0	0	2	0	0	0	0	0	0	0	0	0		P22364	PF13473	PTHR36507
TRINITY_DN10149_c0_g1_i4	186.961	194.92	46.992	74	59	146.333	46	50	39.836	77	20	83	23	67.774	25	56.682	AT1G19110			PTHR46503:SF1|PTHR46503
TRINITY_DN1014_c0_g1_i10	423.985	147.934	309.504	443.471	372.885	574.335	464.237	261.185	276.252	439.742	275.775	298.399	224.609	418.845	248.021	889.791	AT1G19450	Q8IUS5	PF00561	PTHR43139:SF53|PTHR43139
TRINITY_DN1014_c0_g1_i2	201.959	61.699	210.177	325.615	271.676	362.326	233.291	151.447	119.736	175.26	125.696	188.222	123.747	149.274	117.539	384.794	AT1G19450	Q92383	PF00730	PTHR43003|PTHR43003:SF8
TRINITY_DN1014_c0_g1_i4	115.39	126.014	91.8	168.115	183.66	260.358	109	131.755	42.76	41.967	31.887	30.357	34.653	53.98	37.693	58.792	AT1G75220	Q9FRL3	PF00083	PTHR48021:SF23|PTHR48021
TRINITY_DN1014_c0_g1_i5	57.954	87.176	42.442	104.108	48.76	79.423	65.155	54.892	33.2	31.195	24.185	16.894	37.215	39.377	33.441	39.213	AT1G19450	Q92383	PF00730	PTHR43003:SF8|PTHR43003
TRINITY_DN1014_c0_g1_i8	64.038	33.682	32.169	51.47	29.244	32.814	62.934	39.172	5.094	16.923	8.532	2.688	27.326	12.953	15.908	51.036	AT1G19450	Q92383	PF00730	PTHR43003:SF8|PTHR43003
TRINITY_DN1014_c0_g1_i9	220.859	62.494	100.908	239.277	156.775	209.866	157.615	129.632	67.958	126.914	57.925	87.441	70.45	107.623	99.398	164.375	AT1G19450	Q93YP9	PF00083	PTHR48021:SF23|PTHR48021
TRINITY_DN1014_c1_g1_i1	295.958	433.328	140	260.875	190.03	334	272	237.999	123.904	104.426	96.71	179.859	223.903	245.738	122	233.827	AT1G77290	O80662	PF13410|PF13417	PTHR45374
TRINITY_DN10150_c0_g1_i3	344.325	539.035	462	1110	851.815	416	1245.25	1073.46	614	351.597	504	465	528	550	540	738	AT4G33950
TRINITY_DN10150_c1_g1_i1	1111.2	1240	86	122.002	67	867.55	117.229	46	96	953.001	86	85	123	163	198	443	AT5G62580	Q6NPR6	PF02985	PTHR31355|PTHR31355:SF8
TRINITY_DN101527_c0_g1_i1	0	1	0	1	2	0	0	2.239	0	0	0	0	0	0	0	0	AT1G49960
TRINITY_DN10152_c0_g1_i1	192.446	565.568	109.583	177.679	194.724	231.769	225.278	154.497	116.921	154.741	115.517	77.245	197.927	174.222	88	121.77	AT1G08700	O64668	PF01080	PTHR10202:SF26|PTHR10202
TRINITY_DN10152_c0_g1_i2	39.584	10.203	13.417	39.203	21.204	5.209	10.603	11.347	16.08	18.705	13.483	8.755	6.06	5.778	0	6.166	AT1G08700	O64668	PF01080	PTHR10202|PTHR10202:SF26
TRINITY_DN10153_c0_g1_i1	48.231	73.327	22.659	55.399	17.849	46.653	62.648	43.035	31	69.004	42	56	116.216	116	60	81	AT4G37660	O78414	PF00542	PTHR45987|PTHR45987:SF11
TRINITY_DN10153_c0_g1_i2	38.769	74.673	18.341	40.601	41.151	18.347	59.352	28.965	0	0	0	0	0	0	0	0	AT4G37660	O78414	PF00542	PTHR45987:SF11|PTHR45987
TRINITY_DN10154_c0_g1_i1	60	75	43	106	95.065	42	86	67	38	32	28	23	64	75	26	52	AT3G07565		PF12579|PF00249	PTHR14000:SF18|PTHR14000
TRINITY_DN10154_c0_g2_i1	250	342.002	105	205	204	168.008	157.286	151.253	186	126	134	103	115	143	127	204.998	AT3G07565		PF12579	PTHR14000:SF32|PTHR14000
TRINITY_DN10157_c0_g2_i3	21.131	49.844	64.815	129.502	89.99	45.818	58.317	136.368	52.817	19.663	16.836	62.251	9.594	9.058	4.422	1.836	AT3G26890		PF13889	PTHR13199:SF17|PTHR13199
TRINITY_DN10157_c0_g2_i5	192.869	229.156	664.465	1084.17	707.01	463.183	530.687	845.207	1206.58	881.337	643.164	630.858	184.406	355.942	233.578	324.164	AT3G26890		PF13889	PTHR13199:SF17|PTHR13199
TRINITY_DN10158_c0_g1_i1	25	72	0	0	1	8	4	0	0	0	0	1	0	0	0	0	AT3G20820	Q00874	PF13516|PF13516|PF08263	PTHR48060|PTHR48060:SF3
TRINITY_DN101598_c0_g1_i1	0	0	0	0	0	1	0	0	0	0	0	0	0	0	0	0		P78581	PF07519	PTHR33938:SF16|PTHR33938
TRINITY_DN10159_c0_g1_i1	1059.62	2820.46	678.252	721.003	584.192	716.635	445.897	609.123	640.194	886.258	835.234	751.434	1980.01	1641.76	517.678	579.944	AT3G29320	P53535	PF00343|PF00343	PTHR11468:SF27|PTHR11468
TRINITY_DN10159_c0_g1_i4	8.734	5.943	7.322	30.202	1.871	13.306	11.588	11.202	0	10.01	21.353	5.475	4.998	3.458	7.329	13.9	AT3G29320	P27598	PF00343|PF00343	PTHR11468|PTHR11468:SF27
TRINITY_DN10159_c0_g1_i5	12.033	35.563	1.348	32.379	11.947	4.813	22.179	9.209	12.919	9.79	9.265	1.554	7.848	37.136	16.639	17.48	AT3G29320	P27598	PF00343	PTHR11468:SF27|PTHR11468
TRINITY_DN10159_c0_g1_i6	49.416	102.53	50.673	54.361	41.229	26.936	7.957	32.247	23.853	6.64	3.908	6.822	11.117	16.538	6.372	19.133	AT3G29320	P27598	PF00343|PF00343	PTHR11468|PTHR11468:SF27
TRINITY_DN10159_c0_g1_i7	141.072	240.367	81.169	169.968	185.981	158.924	91.361	103.915	65.081	104.176	241.773	74.88	120.433	174.319	212.365	171.538	AT3G29320	P27598	PF00343	PTHR11468|PTHR11468:SF27
TRINITY_DN10159_c0_g1_i9	66.78	155.539	31.531	24.506	26.712	39.641	38.355	40.232	40.953	54.104	61.754	64.836	101.345	88.581	24.114	12.472	AT3G29320	P53535	PF00343|PF00343	PTHR11468:SF27|PTHR11468
TRINITY_DN1015_c0_g1_i6	4584.14	1918.91	113	4297.29	1483.74	8947.14	2357.87	679.016	3405.58	1195.73	378.335	4286.86	2886.72	2345.88	4182.7	4418.94	AT2G40000	O04203	PF07014|PF07231	PTHR34795:SF1|PTHR34795
TRINITY_DN1015_c1_g1_i2	1089.86	1373.37	1419.84	2216.73	1792.32	1302.69	1685.37	1872.03	1367.57	832.592	1081.89	936.427	629.628	1341.3	834.179	1164.48	AT3G06670	Q5SP90	PF04802	PTHR23318|PTHR23318:SF24
TRINITY_DN1015_c1_g1_i3	480.401	348.412	467.539	804.743	644.725	544.848	389.478	542.251	349.321	277.548	298.699	315.178	188.497	371.228	199.092	265.235	AT3G06670	Q6INN7	PF04802	PTHR23318:SF22|PTHR23318
TRINITY_DN1015_c1_g1_i6	1396.08	1666.42	1369.83	3164.56	2965.11	1422.47	2954.31	2489.38	1439.11	881.59	1058.41	1039.61	745.875	1359.86	980.728	1193.77	AT3G06670	Q5SP90	PF04802	PTHR23318:SF24|PTHR23318
TRINITY_DN1015_c2_g1_i11	75.502	187.98	34.568	22.408	50.2	75.811	17.08	26.904	1.408	4.779	7.884	0	1.124	0	2.078	4.12	AT1G48175	Q6IDB6
TRINITY_DN1015_c2_g1_i12	14.809	9.948	2.787	0	0	1.5	0	1.076	0	4.457	0	1	0	0	0	1
TRINITY_DN1015_c2_g1_i13	97.795	277.835	88.645	157.592	62.237	82.689	38.92	51.02	15.592	26.764	22.116	15	19.876	26	13.922	15.88	AT1G48175	Q6IDB6
TRINITY_DN1015_c2_g1_i3	2.894	4.236	0	0	1.563	0	0	0	0	0	0	0	0	0	0	0	AT1G48175
TRINITY_DN1015_c3_g1_i2	639.287	558.702	706.806	1526	737.377	732.064	1213.52	1035.18	1130.74	737.411	876.259	828.475	546.946	863.963	618.855	750.542	AT4G16440	Q94CL6	PF02256|PF02906	PTHR11615|PTHR11615:SF258
TRINITY_DN101609_c0_g1_i1	0	0	0	0	0	0	1	2	1	0	0	0	0	0	0	1	AT3G09820	O49923		PTHR45769:SF3|PTHR45769
TRINITY_DN101609_c0_g1_i3	0	1	17	3	3	0	4	13	0	0	0	3	0	1	0	0	AT3G09820	P47143	PF00294	PTHR45769
TRINITY_DN101609_c0_g2_i1	0	0	0	0	0	0	0	0	0	0	0	0	0	0	0	0	AT5G03300	P78825	PF00294	PTHR45769|PTHR45769:SF3
TRINITY_DN101609_c0_g2_i3	0	0	0	0	0	0	0	0	0	0	0	0	0	0	0	0	AT5G03300	P78825	PF00294	PTHR45769:SF3|PTHR45769
TRINITY_DN10161_c0_g1_i1	1	0	0	0	0	0	1	2	0	0	0	1	0	1	0	1	AT2G36690	Q6Z244	PF14226|PF03171	PTHR47990|PTHR47990:SF47
TRINITY_DN10161_c0_g1_i2	0	1	0	0	1	8	0	0	2	5	0	0	0	1	0	0	AT4G10490	Q6Z244	PF03171	PTHR47990:SF47|PTHR47990
TRINITY_DN101623_c0_g1_i1	0	2	0	2	0	0	0	1	0	0	0	0	0	0	0	0	AT1G67550	Q89UG3	PF00547	PTHR33569
TRINITY_DN101625_c0_g1_i5	73.002	124.977	128.994	267.293	190.994	120.997	157.998	182.998	56.996	19	48.999	30.009	14	50.996	28	26
TRINITY_DN101626_c0_g1_i2	0	0	2	4	0	2	0	0	2	0	0	2	6	1	2	0	AT4G05120	Q9M0Y3	PF01733	PTHR10332|PTHR10332|PTHR10332:SF30|PTHR10332:SF30
TRINITY_DN10162_c0_g1_i4	0	3	0	0	0	0	0	0	5	13	2	1	1	4	1	4.211		V9M2S5
TRINITY_DN101636_c0_g1_i7	0	0	0	0	0	0	0	4	0	0	0	0	0	0	0	2	AT2G26140	P32795	PF17862|PF01434|PF00004	PTHR23076|PTHR23076:SF97
TRINITY_DN101636_c0_g1_i8	0	0	1	0	0	0	0	0	0	0	0	0	0	0	3	0	AT2G26140	P32795	PF17862|PF01434|PF00004	PTHR23076:SF97|PTHR23076
TRINITY_DN101636_c0_g1_i9	0	0	0	0	0	0	0	4	2	0	2	1	0	0	0	0	AT2G26140	P32795	PF17862|PF00004|PF01434	PTHR23076:SF97|PTHR23076
TRINITY_DN101645_c1_g1_i1	0	0	0	0	0	2	0	0	0	0	0	1	0	0	0	0
TRINITY_DN101651_c0_g1_i1	0	0	0	0	1	1	0	1	0	0	0	0	0	0	0	0
TRINITY_DN101656_c0_g1_i1	0	0	0	0	0	0	0	6	0	0	2	0	0	0	2	0			PF07019	PTHR20994:SF0|PTHR20994
TRINITY_DN101657_c0_g1_i4	0	0	0	0	0	0	5	10	9	0	2	2	0	0	0	7	AT1G17990	I1RV17	PF00724	PTHR43303:SF7|PTHR43303
TRINITY_DN10165_c0_g1_i1	857.328	1024.32	307.252	659.058	922.711	977.135	818.362	808.765	469.329	247.2	150.507	357.982	469.207	369.081	307.563	1447.39	AT1G08630	Q8RXU4	PF01212	PTHR48097|PTHR48097:SF4
TRINITY_DN10165_c0_g1_i11	112.067	91.793	61.462	166.911	184.961	139.553	122.649	105.44	85.753	37.676	51.268	39.366	66.024	71.769	44.674	165.937	AT1G08630	Q8RXU4	PF01212	PTHR48097:SF4|PTHR48097
TRINITY_DN10165_c0_g1_i4	96.25	7.016	299.286	613.92	518.328	387.087	309.978	460.069	285.918	215.124	194.272	243.652	282.769	299.152	324.853	695.674	AT1G08630	Q8RXU4	PF01212	PTHR48097:SF4|PTHR48097
TRINITY_DN10167_c0_g2_i3	14	12.266	0	0	0	41.05	1	0	0	7.167	1	0	0	0	0	0	AT4G00770			PTHR33623:SF17|PTHR33623
TRINITY_DN10167_c0_g2_i4	0	32.734	1	8	0	0	0	0	1	2.833	1	3	1	0	1	2	AT4G00770			PTHR33623|PTHR33623:SF17
TRINITY_DN101680_c0_g1_i14	0	0	40	56	2	0	53	33	1	0	0	1	0	0	3	0
TRINITY_DN101682_c0_g1_i1	1	0	0	0	0	0	3	0	0	0	0	0	0	0	0	0		Q9UW81	PF01036	PTHR28286:SF2|PTHR28286
TRINITY_DN101684_c0_g1_i1	0	0	3	6	0	0	5	13	0	0	0	0	0	0	0	0
TRINITY_DN10169_c0_g1_i3	0	0	0	95.995	0	59.16	129.481	0	47.205	60.28	52.175	59.317	135.111	94.06	44.333	96.419	AT3G18240	Q03976	PF10213	PTHR13490
TRINITY_DN10169_c0_g1_i4	78.8	141.938	84.616	0	119.994	0	0	66.048	0	0	0	0	0	0	0	0	AT3G18240		PF10213	PTHR13490
TRINITY_DN10169_c0_g1_i7	61.007	174.076	0	139.103	68.513	100.003	124.73	117.202	0	0	0	0	0	0	0	0	AT3G18240		PF10213	PTHR13490
TRINITY_DN10169_c0_g1_i9	93.178	185.988	86.384	56.903	173.366	48.837	128.789	105.75	80.795	92.72	98.825	94.683	162.889	147.312	69.667	120.581	AT3G18240		PF10213	PTHR13490
TRINITY_DN1016_c0_g1_i2	2463.43	4073.95	1566.31	2541.85	2220.45	2037.7	2130.71	1701.02	933.148	992.555	701.309	617.014	588.627	963.218	637.509	943.413	AT3G07160	Q9SFU6	PF02364	PTHR12741|PTHR12741:SF88
TRINITY_DN1016_c0_g1_i3	306.538	398.406	79.593	99.252	232.555	193.553	137.606	170.886	63.852	33.445	26.691	46.834	11.373	32.81	4.491	11.534	AT3G07160	Q9SFU6	PF02364	PTHR12741|PTHR12741:SF88
TRINITY_DN1016_c0_g2_i3	124.543	790.976	121.802	300.303	382.523	97.543	376.381	0	0	246	204.45	243	195.797	169.122	308.82	114.018	AT4G04970	Q9S9U0	PF14288|PF02364	PTHR12741|PTHR12741:SF77
TRINITY_DN1016_c0_g2_i4	522.519	380.011	227.362	393.825	107.479	472.457	99.302	305	213	0	35.55	0	251.203	223.878	45.15	658.302	AT4G04970	Q9S9U0	PF02364|PF14288	PTHR12741:SF77|PTHR12741
TRINITY_DN1016_c0_g2_i6	32	70	4	1	8	4	1	1	0	0	0	0	1	0	2.03	0	AT4G03550	Q9S9U0	PF14288	PTHR12741:SF82|PTHR12741
TRINITY_DN10170_c0_g1_i10	0	0	0	0	0	0	0	0	0	0	0	0	0	0	0	0	AT1G14520	Q4V8T0	PF05153	PTHR12588:SF0|PTHR12588
TRINITY_DN10170_c0_g1_i11	1	0	5	0	0	0	0	21.005	0	0	0	0	0	0	0	2.604	AT1G14520	Q8L799	PF05153	PTHR12588|PTHR12588:SF0
TRINITY_DN10170_c0_g1_i19	0	0	0	0	0	0	2	0	0	2	0	0	0	0	0	8.395	AT1G14520	Q8L799	PF05153	PTHR12588|PTHR12588:SF0
TRINITY_DN10170_c0_g1_i3	0	0	1	0	5	0	4	8.995	0	0	1	0	0	0	0	2	AT1G14520	Q8L799	PF05153	PTHR12588:SF0|PTHR12588
TRINITY_DN10171_c0_g1_i1	0	0	0	0	30.325	1.284	0	44.774	0	0	0	0	7.059	9.116	0	0	AT1G45616	Q9C637	PF08263|PF00560|PF13855|PF13855|PF13855	PTHR48061:SF2|PTHR48061|PTHR48061|PTHR48061:SF2
TRINITY_DN10171_c0_g1_i4	0	3.631	14.249	3.388	0	0	0	3.539	32.187	29.525	32.413	23	28.941	31.884	14.113	9.172	AT1G45616	Q9C637	PF08263|PF00560|PF13855|PF13855|PF13855	PTHR48061:SF2|PTHR48061|PTHR48061:SF2|PTHR48061
TRINITY_DN10171_c0_g1_i5	11.235	22.649	5.471	32.364	29.675	15.716	29.432	27.686	0	0	0	0	0	0	0	0	AT1G45616	Q9C699	PF13855|PF13855|PF13855|PF08263|PF00560	PTHR48061|PTHR48061:SF2|PTHR48061:SF2|PTHR48061
TRINITY_DN10171_c0_g1_i9	3.765	7.72	11.28	1.249	0	0	85.568	0	1.813	7.475	1.587	0	0	0	7.887	20.828	AT1G45616	Q9C699	PF13855|PF13855|PF13855|PF08263|PF00560	PTHR48061|PTHR48061:SF2|PTHR48061|PTHR48061:SF2
TRINITY_DN10172_c0_g1_i3	156.04	27.697	268.909	583.734	327.781	154.665	844.054	216.376	393.953	119.718	205.345	150.962	124.717	107.182	236.156	353.899	AT5G59050			PTHR33356|PTHR33356:SF16
TRINITY_DN10172_c0_g1_i4	20.96	1.303	38.201	108.957	48.246	3.335	92.582	38.167	50.047	11.282	15.655	22.038	5.283	21.818	18.844	39.163	AT5G59050			PTHR33356:SF16|PTHR33356
TRINITY_DN10172_c0_g2_i1	57.335	70.175	23.94	80.91	64.329	91.286	95.825	32.193	138.443	89.886	64.413	74.862	72.136	74.337	88.543	99.784	AT5G59050			PTHR33356|PTHR33356:SF16
TRINITY_DN10172_c0_g2_i3	349.665	647.892	409.06	550.09	527.671	667.714	702.57	724.807	446.557	491.114	326.587	327.138	338.864	377.011	422.457	614.216	AT5G59050			PTHR33356|PTHR33356:SF16
TRINITY_DN10172_c1_g1_i1	190.356	123.751	404.438	490.473	317.995	195.883	171.347	399.662	166.643	122.96	144.605	162.177	100.062	124.005	104.648	120.512	AT4G13750	F4JTS8		PTHR32387|PTHR32387:SF0
TRINITY_DN10172_c1_g1_i2	1069.3	1020.74	986.09	2487.11	1825.01	889.992	1743.74	1405.22	1434.36	1257.04	1229.14	1449.82	1227.94	1503.75	1192.35	1574.49	AT4G13750	F4JTS8	PF13020	PTHR32387:SF0|PTHR32387
TRINITY_DN101739_c0_g1_i1	0	0	0	0	0	0	0	23	2	3	3	0	0	0	5	2	AT2G46320	Q6DHC3	PF00153|PF00153|PF00153|PF00153	PTHR45760:SF2|PTHR45760
TRINITY_DN101752_c0_g1_i1	0	0	0	0	0	0	0	0	0	0	0	0	0	0	0	0
TRINITY_DN101752_c0_g1_i3	0	0	0	4	0	0	0	0	0	0	0	0	0	0	0	0
TRINITY_DN10175_c0_g1_i4	3987.14	6146.38	2954.84	4811.6	4495.2	4749.03	3964.76	3972.73	2881.72	5247.94	3551.44	3363.91	4889.23	3738.09	2706.96	4359.62	AT2G17390	Q29Q26	PF17830|PF12796	PTHR24203|PTHR24203:SF58
TRINITY_DN10175_c0_g1_i5	47.016	50.732	14.576	52.345	94.197	40.627	39.768	26.807	23.283	26.243	20.557	32.086	12.769	78.843	24.039	38.384	AT2G17390	Q29Q26	PF17830	PTHR24203:SF58|PTHR24203
TRINITY_DN10176_c0_g3_i2	0	0	0	0	0	0	0	0	0	0.5	0	0	0	0	0.5	0	AT4G13710	Q944R1	PF00544	PTHR31683|PTHR31683:SF81
TRINITY_DN10176_c0_g3_i3	8	7	0	0	0	2	0	0	0	0	0	0	0	0	0	0	AT4G13710	Q944R1	PF00544	PTHR31683:SF81|PTHR31683
TRINITY_DN10176_c0_g3_i4	0	0	0	0	0	0	0	0	0	0.5	0	0	0	0	0.5	0	AT4G13710	Q944R1	PF00544	PTHR31683|PTHR31683:SF81
TRINITY_DN10177_c0_g1_i1	9.853	12.817	2.17	8.445	0	5.601	0	0	0	0	0	0	0	0	3	1
TRINITY_DN10177_c0_g1_i11	42.835	74.249	16.993	30.425	30.692	22.342	30.43	15.264	7.064	7.342	10.01	7	3	4.918	3	5
TRINITY_DN10177_c0_g1_i4	5.373	39.573	0	12.119	0	11.36	12.879	0	0	3.658	3.99	0	0	6.082	0	0
TRINITY_DN10177_c0_g1_i6	34.939	65.36	9.837	27.012	23.308	5.696	15.691	20.736	2.936	0	0	0	0	0	0	0
TRINITY_DN101781_c0_g1_i2	0	0	0	0	0	0	0	2	0	0	0	0	0	0	3	1		O42622	PF01204	PTHR23403|PTHR23403:SF6
TRINITY_DN101782_c0_g1_i1	0	0	0	0	0	0	2	4	0	0	0	0	0	0	0	1	AT1G09400	Q6UEF0	PF00724	PTHR43656|PTHR43656:SF5
TRINITY_DN10178_c0_g1_i12	272.208	107.068	205.798	233.584	180.916	342.65	159.761	111.199	82.39	196.064	93.591	156.168	67.688	123.944	69.22	74.335				PTHR35281|PTHR35281:SF4
TRINITY_DN10178_c0_g1_i14	143.903	84.31	11.859	23.71	37.966	91.823	28.68	35.07	9.385	2.178	2.778	9.23	2.258	4.637	1.089	20.713	AT3G14470	Q9LRR4	PF18052	PTHR23155|PTHR23155:SF1132
TRINITY_DN10178_c0_g1_i15	89.744	111.307	64.121	126.836	100.884	96.898	84.24	134.603	6.312	0	8.527	13.049	5.988	5.522	2.377	7.183				PTHR35281|PTHR35281:SF4
TRINITY_DN10178_c0_g1_i16	0	0	0	0	0	0	7.199	0	0	0	0	0	0	0	0	0			PF18052
TRINITY_DN10178_c0_g1_i19	163.569	236.333	160.801	322.112	390.064	151.852	383.926	330.654	124.884	65.174	125.852	71.781	48.041	65.078	63.249	71.619				PTHR37263
TRINITY_DN10178_c0_g1_i2	312.92	252.004	129.499	342.07	314.407	252.593	360.962	241.164	114.104	114.687	99.631	199.243	124.243	133.726	159.944	153.106		Q9LRR5	PF18052
TRINITY_DN101797_c0_g1_i1	3	25	0	0	0	0	0	0	0	0	0	0	0	0	0	0			PF13456	PTHR33033:SF67|PTHR33033
TRINITY_DN101798_c0_g1_i6	0	0	1	0	0	0	2	11	0	0	2	0	0	0	0	0	AT3G06050	O14313	PF08534	PTHR10430:SF16|PTHR10430
TRINITY_DN1017_c0_g1_i13	360.316	557.657	292.162	385.511	317.92	302.81	517.145	396.5	239.82	237.758	217.278	294.276	224.007	225.815	213.967	447.165	AT1G50670	Q9LPT6	PF02338	PTHR13312:SF0|PTHR13312
TRINITY_DN1017_c0_g1_i14	39.947	70.392	51.147	101.662	108.661	34.715	52.285	85.178	47.103	7.536	24.39	20.824	6.318	24.139	23.298	10.511	AT1G50670	Q9LPT6	PF02338	PTHR13312|PTHR13312:SF0
TRINITY_DN1017_c0_g1_i17	16.502	28.813	0	55.094	77.292	27.179	67.019	99.858	72.865	12.226	22.415	50.389	11.14	54.653	20.402	32.946	AT1G50670
TRINITY_DN1017_c0_g1_i23	81.945	49.531	88.048	95.155	36.711	0	26.846	47.944	35.315	0	56.307	0	0	0	0	0	AT1G50670
TRINITY_DN1017_c0_g1_i31	326.053	595.89	281.853	573.339	475.339	377.285	538.714	526.554	349.897	374.464	307.677	312.176	199.682	152.861	262.702	362.489	AT1G50670	Q9LPT6	PF02338	PTHR13312|PTHR13312:SF0
TRINITY_DN1017_c0_g1_i6	5.285	0	10.79	2.239	4.333	4.978	0	2.314	0	4.407	0	0	0	0	0	0	AT1G50670	Q9LPT6		PTHR13312|PTHR13312:SF0
TRINITY_DN1017_c0_g1_i8	0	0	0	0	31.744	10.033	0	0	0	12.946	0	19.336	13.853	56.587	8.216	20.89	AT1G50670	Q9LPT6	PF02338	PTHR13312|PTHR13312:SF0
TRINITY_DN101801_c1_g1_i12	2	0	12	4	2	1	9.574	14	0	0	0	1	0	0	2	4.188	AT4G09000	B8NLM9	PF00244	PTHR18860:SF39|PTHR18860
TRINITY_DN101801_c1_g1_i3	0	0	0	0	0	0	0	0	0	0	1	0	0	0	0	1.41	AT4G09000	B8NLM9	PF00244	PTHR18860|PTHR18860:SF39
TRINITY_DN101801_c1_g1_i6	0	0	2	3	2	0	1.177	11	0	0	0	0	0	0	3	1.403	AT4G09000	B8NLM9	PF00244	PTHR18860:SF39|PTHR18860
TRINITY_DN101801_c1_g1_i9	0	0	1	2	0	0	1.249	0	1	1	0	0	1	0	0	0	AT4G09000	B8NLM9	PF00244	PTHR18860:SF39|PTHR18860
TRINITY_DN10180_c0_g1_i1	0	0	12	10	5	0	14	13	0	3	2	4	1	0	0	5	AT1G77940	Q7S7F1	PF01248	PTHR11449
TRINITY_DN10180_c0_g1_i2	0	0	1	1	0	0	1	8	3	1	8	3	0	0	4	17	AT1G36240	Q7S7F1	PF01248	PTHR11449
TRINITY_DN10181_c0_g1_i1	133.448	37.444	113.696	152.387	96.285	87.862	132.462	59.557	27.324	49.389	64.424	91.311	36	38.826	27.637	0	AT3G59100	Q9LYS6	PF14288|PF04652	PTHR12741|PTHR12741:SF55
TRINITY_DN10181_c0_g1_i4	186.064	156.886	42.126	154.103	134.325	232.293	8.252	128.084	71.34	0	48.576	0	0	28.689	21.363	46	AT3G59100	Q9LYS6	PF04652|PF14288|PF02364	PTHR12741:SF55|PTHR12741
TRINITY_DN10181_c0_g1_i6	27.507	8.67	9.178	6.51	12.39	17.845	17.286	14.359	1.335	2.611	0	2.689	0	1.487	0	0	AT3G59100	Q9LYS6	PF14288|PF04652	PTHR12741:SF58|PTHR12741
TRINITY_DN101827_c0_g1_i8	0	0	0	1.997	0	0	3.339	12.322	0	0	0	0	0	0	0	0			PF13881	PTHR13169|PTHR13169:SF0
TRINITY_DN101827_c0_g1_i9	0	0	4	2.003	0	0	11.661	12.678	0	0	2	1	0	0	0	0			PF13881	PTHR13169|PTHR13169:SF0
TRINITY_DN10182_c0_g1_i10	17.832	21.193	5.865	9.77	22.105	10.457	4.032	5.841	0	0	0	0	0	0	0	0
TRINITY_DN10182_c0_g1_i12	201.348	214.603	168.774	291.632	202.894	193.508	428.602	319.154	0	0	0	0	0	3	1	0
TRINITY_DN10182_c0_g1_i16	8	5	6	27	14	17	15	8	8.019	6	12	11	7	14	7	10	AT4G04650		PF13966	PTHR33116|PTHR33116:SF40
TRINITY_DN10182_c0_g1_i3	8.49	2.649	15.415	12.935	1.616	6.56	18.266	15.046	0	0	0	0	0	0	0	0
TRINITY_DN10182_c0_g1_i4	87.33	80.572	17.809	106.664	44.385	43.481	49.099	53.958	0	0	0	0	0	0	0	0
TRINITY_DN10182_c1_g4_i1	0	1	1	2	1	0	2	0	19	11	15	11	5	7	9	6
TRINITY_DN10185_c0_g2_i2	9.468	20.141	11.098	11.626	26.209	20.144	24.527	15.071	13.78	8.466	10.26	1.219	4.478	11.301	3.883	7.51
TRINITY_DN10185_c0_g2_i3	157.527	97.787	232.22	425.718	337.398	162.608	259.883	287.354	382.125	169.948	284.118	324.241	251.072	280.945	255.712	268.121	AT1G65030	Q9NWT1		PTHR44675
TRINITY_DN10185_c0_g2_i6	84.387	178.291	75.174	132.766	157.643	73.152	72.751	85.188	64.559	72.534	79.002	65.041	118.343	98.899	57.663	117.136	AT4G18400			PTHR37242
TRINITY_DN10185_c0_g2_i7	2.75	9.234	5.898	22.889	15.972	13.091	4.839	5.149	9.147	0	9.62	7.498	9.241	9.856	5.742	5.266
TRINITY_DN10185_c0_g2_i8	0	0	1.597	0	0	0	0	3.239	1.39	2.052	0	0	1.866	0	0	1.967	AT1G65030	Q5ZKU8		PTHR44675
TRINITY_DN101870_c0_g1_i3	20.173	22.078	9	4.003	4	16.922	1	6	7	115.357	16	10	7	10	5	4	AT5G12250	P18025	PF00091	PTHR11588:SF351|PTHR11588
TRINITY_DN101871_c0_g3_i1	0	0	1	0	4	0	2	2	0	0	0	0	0	0	0	0			PF13763
TRINITY_DN101875_c0_g1_i3	0	0	0	0	0	0	0	6	0	0	0	0	0	0	1	2	AT4G36420	P53163	PF00542|PF16320	PTHR45987:SF4|PTHR45987
TRINITY_DN101875_c0_g1_i5	0	0	0	0	0	0	1	0	1	0	0	0	0	0	0	1	AT4G36420	P53163	PF00542|PF16320	PTHR45987:SF4|PTHR45987
TRINITY_DN10187_c0_g1_i2	37.644	0	8.472	23.254	53.249	0	105.289	29.036	0	0	0	0	0	0	0	0	AT3G28450	Q9LSI9	PF00560|PF00560|PF08263	PTHR45631|PTHR45631:SF14
TRINITY_DN10187_c0_g1_i3	59.942	13.364	109.254	235.74	160.09	76.081	153.334	151.321	170.664	81.186	66	114.737	105	105	85.77	145.064	AT3G28450	Q9LSI9	PF08263|PF00560|PF00560	PTHR45631|PTHR45631:SF14
TRINITY_DN10187_c0_g1_i4	29.413	4.636	1.274	49.007	30.661	23.919	161.377	1.669	20.336	2.814	0	2.263	0	0	2.23	7.936	AT3G28450	Q9LSI9	PF00560|PF00560|PF08263	PTHR45631|PTHR45631:SF14
TRINITY_DN101880_c0_g1_i1	0	0	0	0	0	0	3	27	0	0	1	0	0	0	13	18		E1VBT6	PF04828	PTHR33337|PTHR33337:SF30
TRINITY_DN10188_c0_g1_i5	1.677	0	0	0.506	0	4.353	0	0	0	0	0	0	0	0.85	0	0	AT2G24130	Q9ZUI0	PF08263|PF13855|PF13855|PF00560	PTHR48052|PTHR48052:SF2
TRINITY_DN10188_c0_g1_i6	1.677	0	0	0.506	0	0	0	0	11.696	23.729	8.492	15.018	3.111	0.85	10.184	11.36	AT2G24130	Q9ZUI0	PF08263|PF13855|PF13855|PF13855	PTHR48052:SF2|PTHR48052
TRINITY_DN10188_c0_g2_i1	10.646	5	0	6.988	13	24.153	5	0	20.304	6.271	0	6.982	0	1.3	4.816	12.64	AT2G24130	Q9ZUI0	PF13855|PF08263|PF00560|PF00560|PF00069|PF13516	PTHR48052:SF2|PTHR48052
TRINITY_DN10188_c0_g2_i2	0	0	0	0	0	0	0	1	0	0	0	0	0	0	0	0	AT2G24130	Q9ZUI0	PF08263|PF13855|PF13855|PF13855	PTHR48052:SF2|PTHR48052
TRINITY_DN10188_c0_g2_i5	0	0	0	0	0	3.494	0	0	0	0	7.508	0	5.889	0	0	0	AT2G24130	Q9ZUI0	PF00560|PF00560|PF00069|PF08263|PF13855	PTHR48052|PTHR48052:SF2
TRINITY_DN101893_c0_g1_i1	2	6	2	4	4	2	14	4	0	0	0	0	0	0	0	0	AT1G19250	Q9LMA1	PF00743	PTHR23023
TRINITY_DN1018_c0_g1_i2	98	128	48	127	114	125	146	93	29.211	39	11	32	27.84	40	34.438	56.001	AT3G57120	F4IB81	PF00069	PTHR46863|PTHR46863:SF2
TRINITY_DN1018_c0_g1_i3	66	12	10	29	10	16	3	93.001	58.162	35.028	26.646	17.116	13.282	17.874	23.558	17.998	AT3G57120	F4IB81		PTHR46863|PTHR46863:SF2
TRINITY_DN101909_c0_g1_i1	1	0	0	0	0	1	0	0	0	0	0	0	0	0	0	0				PTHR35111:SF1|PTHR35111
TRINITY_DN10191_c0_g1_i1	29	29	43	94	52	181	41.968	92	44	47	25	23	18	22	17	23	AT5G03510	Q681X4	PF13912|PF13912	PTHR26374|PTHR26374|PTHR26374:SF381|PTHR26374:SF381
TRINITY_DN10191_c0_g1_i2	0	0	0	0	0	0	3.151	0	0	0	0	0	0	0	0	0	AT5G03510	Q681X4	PF13912|PF13912	PTHR26374:SF387|PTHR26374
TRINITY_DN10191_c0_g1_i3	126	36	816	1581	880	382.011	851.882	2034.95	634	314.003	201	173	72	59	39	115	AT2G28200	Q681X4	PF13912|PF13912	PTHR26374:SF387|PTHR26374
TRINITY_DN101931_c0_g1_i2	0	0	0	0	0	0	0	0	0	0	0	0	0	0	0	0	AT5G18210	O67610	PF13561	PTHR42760|PTHR42760:SF95
TRINITY_DN10194_c0_g1_i1	3.729	12.149	0	13.933	3.181	0	0	0	0	0	11.568	5.839	0	1.657	5.512	5.487	AT5G47020
TRINITY_DN10194_c0_g1_i11	4.753	5.764	0	0	2.467	2.5	3.515	0	0	0	0	0	0	1.212	0	0	AT5G47020			PTHR31513:SF2|PTHR31513
TRINITY_DN10194_c0_g1_i3	44.571	27.028	22.914	26.156	0	45.632	19.318	29.913	2.753	6.328	0	0	5.375	2.605	0	2.965	AT5G47020			PTHR31513|PTHR31513:SF2
TRINITY_DN10194_c0_g1_i4	10.36	2.07	7.816	39.386	41.994	29.03	1.909	8.363	0	0	4.45	2.442	9.899	1.817	3.711	8	AT5G47020			PTHR31513:SF2|PTHR31513
TRINITY_DN10194_c0_g1_i7	229.586	359.873	178.068	330.908	187.423	169.837	232.093	145.361	151.748	87.672	103.39	128.725	42.591	111.38	56.19	86.548	AT5G47020			PTHR31513|PTHR31513:SF2
TRINITY_DN10194_c0_g1_i9	0	6.115	7.202	31.616	11.935	0	0	14.363	10.499	0	11.592	15.994	19.135	13.33	29.587	0	AT5G47020			PTHR31513:SF2|PTHR31513
TRINITY_DN10195_c0_g1_i1	193	206	196	296	308	227.114	423.58	241	229	205	156	170	158	135	197	381	AT1G74410	Q8LBA0	PF13639	PTHR46151|PTHR46151:SF18
TRINITY_DN10196_c0_g1_i1	526.965	198.662	178.49	255.902	110.804	661.929	100.523	59.296	180.048	845.785	212.086	71.131	146.021	70.776	135.833	129.946	AT1G33800	Q9T0F7	PF04669	PTHR31444|PTHR31444:SF26
TRINITY_DN10196_c0_g1_i2	572.336	165.338	141.035	114.098	119.196	807.792	60.477	93.705	81.952	712.657	91.914	48.869	71.979	20.224	106.167	140.054	AT1G09610	Q9T0F7	PF04669	PTHR31444:SF26|PTHR31444
TRINITY_DN101972_c0_g1_i1	0	0	1	7	0	0	3	2	0	0	0	1	0	0	0	0	AT5G09830	P39724	PF01722	PTHR46188
TRINITY_DN101972_c0_g1_i6	0	0	0	0	0	0	0	0	0	0	0	0	0	0	0	0	AT5G09830	P39724	PF01722	PTHR46188
TRINITY_DN101979_c0_g1_i4	6	4	10	14	16.27	10	14	9	450.323	541.376	518.839	672.781	608.17	417.499	348.439	240.633			PF17067
TRINITY_DN10199_c0_g1_i2	389.122	578.527	348.151	663.19	645.597	489.178	622.178	456.088	426.579	357.1	346.972	418.26	524.436	412.803	327.302	504.724	AT3G02760	F4IYF8	PF03129|PF13393	PTHR11476:SF7|PTHR11476
TRINITY_DN10199_c0_g1_i3	303.803	398.939	250.089	388.028	373.524	286.78	486.381	308.445	305.54	329.943	321.305	302.846	409.344	301.975	295.395	434.83	AT3G02760	F4IYF8	PF03129|PF13393	PTHR11476:SF7|PTHR11476
TRINITY_DN10199_c0_g1_i4	225.294	668.263	121.76	217.792	259.879	188.041	395.895	192.468	66.882	91.992	60.723	73.894	160.22	237.222	57.303	151.446	AT3G02760	F4IYF8	PF03129|PF13393	PTHR11476:SF7|PTHR11476
TRINITY_DN1019_c0_g1_i1	18.086	11.917	19.167	33.477	19.809	1.731	24.697	15.839	29.238	1.994	22.547	9.05	12.456	11.897	19.953	16.545	AT3G61415	Q8LF97	PF01466|PF03931	PTHR11165:SF116|PTHR11165
TRINITY_DN1019_c0_g1_i10	195.056	234.779	260.709	412.194	299.481	261.733	286.45	288.932	168.326	66.031	173.177	66.175	60.463	166.497	90.528	91.134	AT3G61415	Q8LF97	PF01466|PF03931	PTHR11165|PTHR11165:SF116
TRINITY_DN1019_c0_g1_i11	284.835	265.449	257.591	426.784	273.901	227.966	360.399	449.593	163.895	20.149	137.779	34.35	38.824	0	116.702	108.758	AT3G61415	Q8LF97		PTHR11165|PTHR11165:SF116
TRINITY_DN1019_c0_g1_i14	98.325	108.197	59.632	146.38	66.028	55.754	92.938	81.722	62.297	86.72	50.547	60.246	46.786	91.594	48.141	60.681	AT3G61415	Q8LF97	PF03931|PF01466	PTHR11165:SF116|PTHR11165
TRINITY_DN1019_c0_g1_i22	152.93	267.913	145.641	246.959	240.453	193.565	145.527	239.876	83.919	51.132	133.385	71.59	50.125	111.175	67.473	37.212	AT3G61415	Q8LF97	PF01466|PF03931	PTHR11165|PTHR11165:SF116
TRINITY_DN1019_c0_g1_i23	0	0	0	0	0	0	0	0	49.114	0	18.908	15.998	26.846	0	22.948	21.794	AT3G61415	Q8LF97	PF01466|PF03931	PTHR11165:SF116|PTHR11165
TRINITY_DN1019_c0_g1_i26	0	0	0	67.936	45.697	71.481	38.87	0	40.336	95.249	120.74	94.73	54.707	227.943	0	41.012	AT3G61415	Q8LF97	PF03931|PF01466	PTHR11165:SF116|PTHR11165
TRINITY_DN1019_c0_g1_i3	51.832	76.719	54.677	89.452	117.21	45.49	113.979	83.338	12.051	14.85	23.22	48.359	15.413	50.803	21.822	31.156	AT3G61415	Q8LF97		PTHR11165|PTHR11165:SF116
TRINITY_DN1019_c0_g1_i7	112.893	46.026	39.583	121.879	111.421	101.813	73.298	65.188	19.001	31.929	32.781	69.504	28.38	81.081	15.433	19.708	AT3G61415	Q8LF97	PF03931|PF01466	PTHR11165:SF116|PTHR11165
TRINITY_DN101_c0_g1_i11	45.085	150.571	89.147	55.586	0	277.85	0	30.235	0	0	0	86.442	0	0	0	0	AT5G46240	Q93Y37	PF01532	PTHR11742|PTHR11742:SF88
TRINITY_DN101_c0_g1_i12	517.16	287.178	619.955	622.985	514.786	951.014	232.828	790.805	436.46	669.668	571.305	360.485	42.895	94.209	58.301	121.471	AT5G46240	Q39128	PF00027|PF11834|PF00520|PF13857	PTHR45743:SF6|PTHR45743
TRINITY_DN101_c0_g1_i13	69.669	25.364	130.53	185.656	48.578	92.36	0	13.352	24.176	104.746	21.455	51.092	0	31.117	10.45	0	AT5G46240	Q39128	PF00520|PF00027	PTHR45743:SF6|PTHR45743
TRINITY_DN101_c0_g1_i15	165.726	226.32	662.484	412.863	132.029	1128.77	17.669	320.227	24.676	108.356	0	23.534	5.15	0	0	7.333	AT4G18290	Q39128	PF13857|PF00027|PF11834|PF00520	PTHR45743:SF6|PTHR45743
TRINITY_DN101_c0_g1_i16	251.897	267.436	0	200.171	141.174	0	392.309	95.781	218.13	309.509	165.562	240.378	280.201	0	228.55	321.865	AT1G30000	Q39128	PF00520|PF12796|PF00027|PF11834	PTHR45743:SF6|PTHR45743
TRINITY_DN101_c0_g1_i19	119.247	184.04	218.653	220.601	172.986	300.738	197.464	152.563	185.078	78.207	67.895	26.385	35.392	264.729	18.244	87.033	AT1G30000	Q93Y37	PF01532	PTHR11742|PTHR11742:SF88
TRINITY_DN101_c0_g1_i3	135.611	56.473	152.375	139.623	117.479	168.055	18.065	144.133	40.264	65.32	109.393	78.705	1.722	8.914	5.076	0	AT5G46240	Q39128	PF00520	PTHR45743|PTHR45743:SF6
TRINITY_DN101_c0_g1_i7	4.358	1.416	0	1.212	1.246	1.183	5.759	3.744	0	0	0	0	0	0	3.975	0	AT1G30000	Q93Y37	PF01532	PTHR11742|PTHR11742:SF88
TRINITY_DN101_c0_g1_i8	4.849	22.868	6.802	10.457	6.725	7.61	2.317	25.253	7.214	7.216	7.463	7.98	5.64	3.312	4.405	9.298	AT5G46240	Q39128	PF00520	PTHR45743|PTHR45743:SF6
TRINITY_DN101_c0_g2_i1	0	3	2	0	0	2	0	1	0	0	0	0	0	2	0	0	AT1G30000	Q93Y37	PF01532	PTHR11742:SF88|PTHR11742
TRINITY_DN102002_c0_g2_i3	0	0	2.812	0	0	0	0	0	0	0	0	0	0	0	0	2	AT5G11170	A1DL85	PF00271|PF00270	PTHR47958|PTHR47958:SF15|PTHR47958:SF15|PTHR47958
TRINITY_DN102002_c0_g2_i5	0	0	12.188	2	2	0	10	9	0	0	1	0	0	0	0	0	AT5G11170	A1DL85	PF00271|PF00270	PTHR47958:SF15|PTHR47958
TRINITY_DN102007_c1_g1_i3	0	0	0	0	0	0	0	0	0	0	0	0	0	0	0	0	AT3G10300	P12815	PF13202|PF13833|PF13499	PTHR46212|PTHR46212:SF5
TRINITY_DN10201_c0_g1_i1	189.287	298.018	120.289	470.533	209.177	173.674	203.141	275.483	117.597	40.664	65.826	43.179	66.651	146.675	30.001	111.328	AT3G13990
TRINITY_DN10201_c0_g1_i2	167.523	312.799	0	81.457	216.86	131.775	201.123	154.384	133.284	76.738	110.141	113.197	0	169.075	154.842	276.015	AT3G13990	Q8VZS6	PF06972	PTHR47070|PTHR47070:SF2
TRINITY_DN10201_c0_g1_i3	497.387	561.694	485.712	513.317	438.47	555.659	574.639	420.163	368.862	523.698	266.225	274.84	366.493	203.678	292.234	254.116	AT3G13990	Q8VZS6	PF06972	PTHR47070|PTHR47070:SF2
TRINITY_DN10201_c0_g1_i4	0	0	0	0	0	0	0	0	0	0	0	0	0	0	0	0	AT3G13990	Q8VZS6	PF06972	PTHR47070:SF2|PTHR47070
TRINITY_DN10201_c0_g1_i5	754.999	1069.55	554.009	1109.94	1084.49	770.897	1300.93	908.001	867.257	801.9	643.808	737.994	868.856	911.571	777.923	1140.54	AT3G13990	Q8VZS6	PF06972	PTHR47070:SF2|PTHR47070
TRINITY_DN10201_c0_g1_i6	0	0	0	0	0	0	0	0	0	0	0	43.781	0	0	0	0	AT3G13990	Q8VZS6	PF06972	PTHR47070:SF2|PTHR47070
TRINITY_DN102020_c0_g1_i1	0	0	0	0	0	0	0	0	0	0	0	0	0	0	0	0		P34121	PF00241	PTHR10829:SF49|PTHR10829
TRINITY_DN10202_c0_g1_i1	56.977	87.647	30.417	548.435	236.434	0	173.496	260.375	364.771	110.639	103.323	252.84	124.238	143.837	82.098	169.445	AT5G42270	O82150	PF17862|PF01434|PF00004	PTHR23076|PTHR23076:SF113
TRINITY_DN10202_c0_g1_i2	20.737	8.479	20.813	97.139	48.335	15.003	21.168	43.656	41.496	15.988	17.555	12.068	48.33	11.916	7.385	40.676	AT5G42270	O82150	PF00004	PTHR23076|PTHR23076:SF113
TRINITY_DN10202_c0_g1_i4	13707.9	9573.1	23850.7	42847.9	36714.4	13774.9	41206.8	47380.7	23267	26404.1	21455.7	34193	53857.3	38599.4	30086.4	46201.5	AT1G50250	O82150	PF17862|PF01434|PF00004	PTHR23076:SF113|PTHR23076
TRINITY_DN10202_c0_g1_i5	49.241	10.864	113.959	161.862	105.564	93.592	76.066	189.532	74.251	4.891	110.509	46.924	14.121	27.351	63.322	14.793	AT5G42270	O82150	PF00004|PF17862	PTHR23076:SF113|PTHR23076
TRINITY_DN102041_c1_g1_i1	1	0	2	0	0	0	7	2	3	0	1	0	0	0	2	2	AT2G33040	Q6C338	PF00231	PTHR11693|PTHR11693:SF22
TRINITY_DN10204_c0_g1_i1	26.561	46.653	14.412	57.72	29.314	51.776	17.378	19.614	8.69	22.894	15.525	19.09	4.523	6.299	11.158	0	AT1G28110	Q93Y09	PF00450	PTHR11802:SF379|PTHR11802
TRINITY_DN10204_c0_g1_i8	20.439	47.825	36.588	47.28	34.686	28.224	96.622	57.386	29.31	10.106	35.475	18.91	11.339	50.701	23.842	47	AT1G28110	Q93Y09	PF00450	PTHR11802|PTHR11802:SF379
TRINITY_DN10204_c1_g1_i1	134.179	152.827	108.689	189.526	139.532	84.803	186.59	87.815	88.897	54.953	139.236	100.855	86.791	133.326	296.377	163.9
TRINITY_DN10204_c1_g1_i6	23.821	17.173	13.311	25.474	11.468	14.197	26.41	8.185	11.103	4.133	25.764	20.145	8.209	9.674	37.623	26.1
TRINITY_DN10205_c0_g1_i1	323.558	859.042	97.74	183.071	37.251	224.071	191.78	140.107	0	0	0	0	0	0	0	0	AT1G47840	Q6Q8A5	PF00349|PF03727	PTHR19443:SF63|PTHR19443
TRINITY_DN10205_c0_g1_i5	228.567	414.972	108.26	220.929	174.751	236.929	42.22	115.893	137	154	115	89	105	129	88	138	AT1G47840	Q6Q8A5	PF00349|PF03727	PTHR19443|PTHR19443:SF63
TRINITY_DN102077_c0_g1_i1	2.998	24	5	9.999	4.128	3	14	9	3	1	7	6	9	10	4	3			PF00705
TRINITY_DN102089_c0_g1_i1	0.5	0	1	0	0	0	0	0	0	0	0	0	0	0	0.5	2.007				PTHR42743:SF13|PTHR42743
TRINITY_DN102089_c0_g1_i2	0.5	0	0	0	0	0	0	4	0	0	0	0	0	0	0.5	1.993				PTHR42743:SF13|PTHR42743
TRINITY_DN102092_c0_g1_i1	0	1	0	3	1	0	0	2	0	0	0	0	0	0	0	0		Q55979
TRINITY_DN10209_c1_g1_i1	4379.29	1992.29	5254.74	9650.41	5392.69	1869	7720.84	18080.1	2247.38	1007.98	978.747	3986.82	2944.35	2906.12	470.382	3041.56	AT5G01410	Q39963	PF01680	PTHR31829|PTHR31829:SF6
TRINITY_DN10209_c1_g1_i2	0	0	0	0	0	0	0	0	0	0	0	0	0	0	0	0	AT5G01410	Q39963	PF01680	PTHR31829:SF6|PTHR31829
TRINITY_DN10209_c1_g1_i3	2279.1	2799.78	6367.72	13069.8	11144.3	3317.72	7898.07	13121.2	4518.81	2538.22	3190.51	4995.33	2304.78	2095.4	2205.26	1262.28	AT5G01410	Q39963	PF01680	PTHR31829|PTHR31829:SF6
TRINITY_DN10209_c1_g1_i7	4.942	0	8.421	0	0	13.056	0	0	565.138	241.8	304.946	958.847	710.032	427.724	160.229	431.158	AT5G01410	Q39963	PF01680	PTHR31829:SF6|PTHR31829
TRINITY_DN10211_c0_g1_i1	20.983	28.717	7.258	20.822	35.907	15.253	12.519	4.787	105.225	92.572	96.839	91.507	118.222	53.418	53.982	121.825	AT1G50820	Q9LNG5	PF10536	PTHR46033:SF6|PTHR46033
TRINITY_DN10211_c0_g1_i3	72.063	150.285	85.742	135.178	132.098	63.747	106.703	114.213	108.775	114.428	110.161	80.493	87.778	94.582	99.018	63.175	AT1G50820	Q9LNG5	PF10536	PTHR46033:SF6|PTHR46033
TRINITY_DN102125_c0_g1_i1	0	0	0	0	0	0	0	0	0	0	0	0	0	0	0	0	AT2G20580	Q7S8R8	PF17781|PF01851|PF01851|PF18051	PTHR10943|PTHR10943:SF1
TRINITY_DN10212_c0_g1_i10	37.389	99.104	29.56	78.414	48.985	54.657	83.765	32.959	132.636	72.474	120.617	117.838	92.867	106.604	84.223	101.305	AT2G44270	O64862	PF01171	PTHR11807:SF12|PTHR11807
TRINITY_DN10212_c0_g1_i13	201.579	185.727	160.595	410.942	297.434	225.868	471.253	418.214	74.754	46.468	63.303	74.033	70.617	78.639	73.868	93.272	AT2G44270	O64862	PF16503|PF01171	PTHR11807:SF12|PTHR11807
TRINITY_DN10212_c0_g1_i3	53.837	41.218	73.912	121.232	181.628	13.885	156.462	89.313	12.739	0	13.637	6.129	11.517	16.03	15.494	0	AT2G44270	O64862	PF01171	PTHR11807|PTHR11807:SF12
TRINITY_DN10212_c0_g1_i9	20.156	24.951	18.933	14.576	10.954	3.589	18.809	16.271	10.871	11.058	12.443	0	0	12.727	7.414	8.423	AT2G44270	O64862	PF01171	PTHR11807|PTHR11807:SF12
TRINITY_DN102137_c0_g1_i1	0	0	0	0	0	0	0	1	0	0	0	0	0	0	0	0	AT5G06580	Q12627	PF02913	PTHR11748|PTHR11748:SF116
TRINITY_DN10213_c0_g1_i1	4	0	0	2	0	1	0	0	1	78	0	0	2	7	0	2		P06600		PTHR34629:SF1|PTHR34629
TRINITY_DN10214_c0_g1_i1	7.637	12.541	0	1.634	3.408	1.783	1.49	4.979	0	2.128	0	0	1.96	0	0	0	AT4G03115	B0G143	PF00153	PTHR45618|PTHR45618:SF21
TRINITY_DN10214_c0_g1_i3	43.314	77.332	44.357	78.365	39.256	45.726	61.441	48.101	74.551	31.192	46.142	30.9	33.933	52.956	29.801	40.453	AT4G03115	B0G143	PF00153|PF00153	PTHR45618:SF21|PTHR45618
TRINITY_DN10214_c0_g1_i8	10.006	22.007	14.057	32.548	6.658	2.862	32.484	16.564	0	0	0	0	0	0	1.664	0	AT4G03115	B0G143	PF00153	PTHR45618|PTHR45618:SF21
TRINITY_DN10214_c0_g2_i14	41.043	47.12	16.586	26.453	32.679	22.629	15.585	23.356	12.449	5.68	11.841	13.1	5.107	12.044	6.535	8.547	AT4G03115	B0G143	PF00153|PF00153	PTHR45618|PTHR45618:SF21
TRINITY_DN10215_c0_g1_i3	571.074	390.644	791.04	1027.37	534.589	520.326	364.531	839.524	737.945	604.336	688	555.769	392.996	254	346.995	365.171	AT1G60010		PF14009	PTHR33413:SF4|PTHR33413
TRINITY_DN10215_c0_g1_i4	19.923	5.356	23.346	22.633	1.411	6.344	3.469	10.807	23.05	1.664	0	4.231	4.004	0	3.701	1.829	AT1G60010		PF14009	PTHR33413:SF4|PTHR33413
TRINITY_DN10219_c0_g1_i12	33.003	80.789	60.32	86.251	83.747	55.192	86.416	45.962	34.737	9.321	17.943	8.206	6.399	21.103	18.269	31.63	AT1G69210			PTHR34544|PTHR34544:SF3
TRINITY_DN10219_c0_g1_i3	111.997	195.211	89.68	138.749	133.253	81.808	141.584	162.038	46.263	42.679	57.057	41.794	73.601	75.897	42.731	62.37	AT1G69210			PTHR34544|PTHR34544:SF3
TRINITY_DN1021_c0_g1_i11	16.718	17.821	6.206	33.193	31.929	28.433	26.565	15.743	0	0	0	0	0	0	0	0	AT4G25180	P05423	PF05132	PTHR13408|PTHR13408:SF6
TRINITY_DN1021_c0_g1_i12	320.429	515.04	533.36	822.171	432.082	393.068	594.901	761.605	1242.99	1268.75	881.572	1386.85	1103.4	727.504	938.364	1063.25	AT5G09380	O74857	PF05132	PTHR13408:SF6|PTHR13408
TRINITY_DN1021_c0_g1_i13	153.971	177.484	161.435	337.75	220.275	148.944	227.387	246.974	113.564	117.447	115.322	114.232	87.245	88.401	110.04	87.324	AT4G25170	P05423	PF05132	PTHR13408:SF6|PTHR13408
TRINITY_DN1021_c0_g1_i14	93.756	52.111	67.132	150.06	153.248	109.129	196.648	118.024	78.249	46.338	67.198	103.597	59.765	65.472	80.633	88.645	AT4G25170			PTHR33625|PTHR33625:SF3
TRINITY_DN1021_c0_g1_i15	603.218	1021.75	806.182	1525.59	1624.33	860.881	1286.68	1180.56	623.431	352.635	1014.57	699.65	398.813	575.814	556.3	643.63	AT5G09380	O74857	PF05132	PTHR13408:SF6|PTHR13408
TRINITY_DN1021_c0_g1_i7	1154.64	1779.23	1529.83	2790.01	2950.24	1463.34	2244.07	2397	1161.72	1162.36	1260.96	1527.67	1043.78	921.863	1033.66	997.153	AT4G25170		PF05132	PTHR13408:SF6|PTHR13408
TRINITY_DN102206_c0_g1_i1	4	4	1	0	0	2	0	0	5	4	4	4	3	0	1	5				PTHR35708
TRINITY_DN102206_c0_g2_i3	52	96.981	65	63	90	86	64	68.99	77	58	79	76	69	32	57	86				PTHR35708:SF3|PTHR35708
TRINITY_DN10220_c0_g1_i1	460.956	456.491	503.787	685.995	494.837	433.788	804.081	521.76	521.986	488.464	336.008	365.45	369.802	233.393	312.577	597.923	AT1G28960	Q8GYB1	PF00293	PTHR12992|PTHR12992:SF27
TRINITY_DN10220_c0_g1_i2	6.597	0	9.783	17.835	33.352	11.247	16.129	18.27	26.215	3.41	13.778	3.52	0	30.604	3.423	3.264	AT1G28960	Q8GYB1	PF00293	PTHR12992|PTHR12992:SF27
TRINITY_DN10220_c0_g1_i3	14.667	11.156	0	14.116	22.024	1.169	2.601	2.263	2.439	0	2.654	5.59	0	0	0	0	AT1G28960	Q8GYB1		PTHR12992|PTHR12992:SF27
TRINITY_DN10220_c0_g1_i4	0	2.981	4.245	6.458	1.491	4.269	9.457	7.786	0	1.638	1.626	1.603	1.499	1.555	0	0	AT1G28960	Q8GYB1	PF00293	PTHR12992:SF27|PTHR12992
TRINITY_DN10220_c0_g1_i5	32.545	45.264	14.043	75.595	14.934	31.977	32.365	31.918	28.36	45.197	47.934	54.837	53.699	77.68	0	63.813	AT1G28960	Q8GYB1		PTHR12992:SF27|PTHR12992
TRINITY_DN10220_c0_g1_i6	1.235	4.109	1.142	0	0	2.55	0	0	0	1.292	0	0	0	6.769	0	0	AT1G28960	Q8GYB1		PTHR12992:SF27|PTHR12992
TRINITY_DN102240_c0_g1_i5	0	0	2	0	0	0	0	5	0	0	0	0	0	0	0	0		Q8BH82	PF13483	PTHR15032|PTHR15032:SF32
TRINITY_DN102242_c0_g1_i2	0	0	0	0	0	0	78.886	22	2	0	2	4	0	0	3	0		A0A2I6PIZ1	PF02515	PTHR48229
TRINITY_DN102242_c0_g1_i3	0	0	1	10	12	0	9.119	0	0	0	0	0	0	0	0	11		A0A2I6PIZ1	PF02515	PTHR48229
TRINITY_DN102255_c0_g2_i2	77	45	32	59	33	65	61	13	40	5	5	10	6	31	6	27	AT1G21270	Q9LMP1	PF12662	PTHR27005:SF379|PTHR27005
TRINITY_DN10227_c0_g1_i1	120	3193.79	37	10	7	79	16	16	8	23	2	2	0	8	0	10	AT4G11080	Q9T012	PF00505|PF00505|PF00505	PTHR46912:SF1|PTHR46912
TRINITY_DN10229_c0_g1_i1	309.265	528.295	274	540.006	493.014	378.832	515	522.014	453	377	386	434	585	488.35	428	680	AT4G04614	Q7SZP2		PTHR31833
TRINITY_DN10229_c1_g1_i1	73	29	203	412.224	187	68	300	542.009	214	78	81	236	69	55	55	78	AT4G27360	O02414	PF01221	PTHR11886|PTHR11886:SF70
TRINITY_DN10229_c2_g1_i1	418	107	173	868	714	720.654	334	488	262	680	202.207	1916	661	450	854	829.451	AT4G27360	O02414	PF01221	PTHR11886|PTHR11886:SF70
TRINITY_DN1022_c0_g1_i1	405.307	722.241	330.964	618.64	620.294	465.24	710.083	588.869	466.729	343.593	381.746	483.98	490.54	371.151	329.91	534.719	AT5G44200	Q9XFD1	PF00076	PTHR18847:SF0|PTHR18847
TRINITY_DN1022_c0_g1_i7	99.693	124.758	79.039	185.36	145.706	101.689	177.455	103.004	80.271	16.587	65.254	43.02	27.46	93.849	39.941	56.281	AT5G44200	Q84L14	PF00076	PTHR18847|PTHR18847:SF0
TRINITY_DN10230_c0_g1_i4	23.071	222.678	146.127	244.045	153.343	135.12	198.26	215.261	22.041	21.945	7.873	0	0	7.83	0	0	AT2G47450	O22265	PF00385|PF13857	PTHR24128:SF43|PTHR24128
TRINITY_DN10230_c0_g1_i5	841.453	653.322	1268.15	2412.82	1791.64	1404.58	1699.46	2080.77	978.959	1174.06	683.638	612	653	724.668	420	643	AT2G47450	O22265	PF00385|PF13857	PTHR24128:SF43|PTHR24128
TRINITY_DN102331_c0_g2_i3	28	70	21	74	35	45	42	37	64	47	79	69	38	47	61	65	AT1G12680
TRINITY_DN102348_c0_g1_i2	0	0	0	0	0	0	0	0	0	0	0	0	0	0	0	0		Q7SB51	PF02537|PF02537	PTHR28259|PTHR28259:SF1
TRINITY_DN10234_c0_g1_i1	133	179	122	247	169	128	346	209	182	187	160	164	240.002	217	133	210	AT1G36310	Q94A09	PF08241	PTHR13069|PTHR13069|PTHR13069:SF33|PTHR13069:SF33
TRINITY_DN102358_c0_g2_i1	0	0	0	0	0	0	1	3	4	0	0	0	0	0	0	10		Q5MBR5	PF03055	PTHR10543|PTHR10543:SF89
TRINITY_DN102364_c0_g1_i2	0	0	0	0	0	0	0	0	0	0	0	0	0	0	0	0		Q07589	PF08546	PTHR21708|PTHR21708:SF26
TRINITY_DN10236_c0_g1_i1	115.523	163.632	106.7	241.434	122.969	173.114	220.195	162.607	110.03	61.306	47.944	43.426	47.414	94.921	27.604	84.002	AT3G49050		PF01764|PF03893	PTHR46398:SF5|PTHR46398
TRINITY_DN10236_c0_g1_i2	100.145	87.462	50.578	86.938	121.185	77.791	108.014	74.516	193.311	160.657	165.003	94.216	126.834	210.527	106.139	179.141	AT3G49050		PF03893|PF01764	PTHR46398:SF5|PTHR46398
TRINITY_DN10236_c0_g1_i4	310.332	522.911	319.859	489.625	514.911	379.269	538.574	507.877	28.659	52.037	5.053	12.358	19.751	90.551	24.257	47.857	AT3G49050		PF03893|PF01764	PTHR46398:SF5|PTHR46398
TRINITY_DN102378_c0_g1_i1	0	0	0	0	0	0	0	6	0	0	0	0	1	0	1	9		P0A0V5	PF02566	PTHR33797
TRINITY_DN10237_c0_g1_i1	0	52.76	59.765	136.274	37.387	10.302	93.493	81.682	35.508	3.779	34.124	3.875	0	26.985	32.321	8.405	AT2G30470	Q8W4L5	PF02362|PF07496	PTHR46245|PTHR46245:SF3
TRINITY_DN10237_c0_g1_i11	31.283	63.938	15.122	4.453	83.907	7.297	20.519	25.27	0	5.969	0	0	0	5.21	0	0	AT2G30470	Q8W4L5	PF02362	PTHR46245:SF3|PTHR46245
TRINITY_DN10237_c0_g1_i15	210	203.24	335.235	478.076	517.613	150.698	605.553	678.512	234.456	95.221	119.876	129.252	110.485	111.147	116.679	111.601	AT2G30470	Q8W4L5	PF02362|PF07496	PTHR46245|PTHR46245:SF3
TRINITY_DN10237_c0_g1_i16	243.717	470.062	100.878	210.365	110.093	237.031	135.58	214.745	65.125	45.031	53	36.185	72.995	76.657	28	41.994	AT2G30470	Q8W4L5	PF02362|PF07496	PTHR46245:SF3|PTHR46245
TRINITY_DN10237_c0_g1_i18	0	0	0	83.005	0	0	87.784	0	14.911	0	0	13.688	0	0	0	0	AT2G30470	Q8W4L5	PF02362|PF07496	PTHR46245|PTHR46245:SF3
TRINITY_DN10237_c0_g1_i2	0	0	0	0	0	0	0	0	0	0	0	0	9.521	0	0	0	AT2G30470	Q8W4L5	PF02362|PF07496	PTHR46245|PTHR46245:SF3
TRINITY_DN102382_c1_g1_i1	0	0	0	0	0	0	0	0	0	0	0	0	0	0	0	0	AT5G65720	P0DN31	PF00266	PTHR11601|PTHR11601:SF34
TRINITY_DN10238_c0_g1_i7	114.936	94	273	213	115	32	315	292	279	63	121	223	202	221	254	408.301	AT4G03020	Q40153	PF00400|PF00400|PF00400	PTHR19847:SF23|PTHR19847
TRINITY_DN102391_c0_g1_i2	0	0	0	0	0	0	0	0	0	0	0	0	0	0	0	0	AT1G16350	Q4WHZ9	PF00478|PF00571|PF00571	PTHR11911
TRINITY_DN1023_c0_g1_i12	1298.03	1958.17	1958.54	4710.12	4396.65	1242.88	3613.78	4672.77	2269.84	1550.23	2302.98	2807.54	2895.21	3154.73	2972.67	2213.87	AT2G28800	Q9FY06	PF02096	PTHR12428|PTHR12428:SF47
TRINITY_DN1023_c0_g1_i7	304.161	345.514	445.016	1050.49	810.647	280.107	634.332	846.073	545.358	394.946	618.132	727.709	740.598	692.404	757.045	593.05	AT2G28800	Q9FY06	PF02096	PTHR12428|PTHR12428:SF47
TRINITY_DN1023_c1_g1_i1	26.283	27.795	91.44	146.851	108.322	32.953	33.844	76.243	33.687	14.182	79.809	112.141	142.651	70.255	102.478	39.563	AT1G78600	Q9SYM2	PF00643	PTHR31832:SF57|PTHR31832
TRINITY_DN1023_c1_g1_i3	313.724	354.233	193.56	463.162	386.678	248.047	452.917	491.747	369.715	136.572	265.276	437.64	512.293	361.477	518.083	402.192	AT1G78600	Q9SYM2	PF00643	PTHR31832:SF57|PTHR31832
TRINITY_DN1023_c2_g1_i19	112.822	163.241	149.907	272.407	177.238	125.383	277.696	197.244	202.168	54.882	134.993	99.532	65.568	199.466	114.308	102.759	AT5G67380	B6F107	PF00069	PTHR24054|PTHR24054:SF49
TRINITY_DN1023_c2_g1_i2	694.219	725.706	185.669	384.874	353.214	699.413	325.801	376.183	268.661	311.24	187.263	223.115	183.451	301.009	256.719	492.766	AT5G67380	Q08467		PTHR24054|PTHR24054:SF47
TRINITY_DN1023_c2_g2_i2	3583.87	4105.58	2359.97	4106.41	3375.26	2983.93	3981.66	3301.05	2082.11	1881.96	1823.38	2018.81	1994.13	1834.51	1704.99	2420.09	AT5G67380	Q08467	PF00069	PTHR24054|PTHR24054:SF47
TRINITY_DN1023_c2_g3_i17	399.576	680.279	338.581	519.627	412.697	306.479	545.641	502.473	411.612	333.187	327.532	338.238	467.87	614.809	422.337	491.141	AT5G67380	Q08467	PF00069	PTHR24054:SF47|PTHR24054
TRINITY_DN1023_c2_g3_i9	519.368	735.657	344.803	694.366	622.469	402.999	650.061	499.427	388.2	349.948	300.21	441.485	477.552	675.764	344.971	540.693	AT5G67380	P28523	PF00069	PTHR24054|PTHR24054:SF47
TRINITY_DN1023_c2_g4_i1	736	1641.28	400.018	732	772	501.821	972	714.056	546.714	547.548	607.63	584.939	1861.46	1353.2	704.675	923.322	AT4G37510	Q9SZV0	PF14622	PTHR11207:SF21|PTHR11207
TRINITY_DN1023_c3_g1_i1	971.847	761.709	746.483	1755.25	912.269	956.63	1747.84	1595.57	1916.96	1519	490	2257.36	1178	2603.49	2167	4014		P31168	PF00257|PF00257	PTHR33346|PTHR33346:SF2|PTHR33346|PTHR33346:SF2
TRINITY_DN1023_c3_g1_i4	1399.17	1837.29	769.374	2524.43	1386.73	2294.41	2595.68	1703.44	0	0	0	0	0	0	0	0		P31168	PF00257|PF00257	PTHR33346|PTHR33346|PTHR33346:SF2|PTHR33346:SF2
TRINITY_DN102403_c1_g4_i1	0	0	0	0	0	0	2	3	0	0	1	0	0	0	0	0		B2WMR5	PF04389	PTHR12147|PTHR12147:SF49
TRINITY_DN102408_c0_g1_i1	0	0	0	0	0	0	0	0	0	0	0	0	0	0	0	0	AT2G28100	Q8GW72	PF00754|PF01120	PTHR10030|PTHR10030:SF37
TRINITY_DN10240_c0_g1_i1	2	0	2	2	0	0	17.423	22.764	1	0	2	1	0	0	4	5		P22943	PF04119	PTHR28145
TRINITY_DN10240_c0_g1_i2	0	0	0	0	0	0	3.577	5.236	0	1	0	0	0	0	0	0		P22943	PF04119	PTHR28145
TRINITY_DN10241_c0_g1_i10	192.244	260.88	315.399	549.825	327.402	188.638	237.56	367.873	347.807	284.43	438.17	498.658	392.993	361.15	326.535	341.186	AT2G04700	O49856	PF02943	PTHR35113
TRINITY_DN10241_c0_g1_i12	47.089	112.349	60.581	100.539	98.507	42.623	122.903	141.364	44.97	4.555	44.539	16.402	6.86	36.682	19.664	0	AT2G04700	Q9SJ89	PF02943	PTHR35113
TRINITY_DN10241_c0_g1_i2	1477.03	1845.38	3511.22	6793.15	5409.92	1401.88	4760.55	6917.35	4928.92	5004.89	8331.15	7954.81	6650.98	6102.6	6549.06	4286.3	AT2G04700	Q9SJ89	PF02943	PTHR35113
TRINITY_DN10241_c0_g1_i6	469.111	775.052	770.015	1382.15	1140.42	555.788	967.963	1251.45	901.77	1067.38	1443.36	1496.39	1447.84	1387.42	1266.61	865.508	AT2G04700	Q9SJ89	PF02943	PTHR35113
TRINITY_DN102428_c0_g1_i1	0	0	3	2	0	0	3	7	0	0	0	0	0	0	1	0		Q7K2G1	PF04683	PTHR12225
TRINITY_DN102428_c0_g1_i3	0	0	0	0	0	0	0	0	2	0	1	0	0	0	1	0		Q6P877	PF04683	PTHR12225
TRINITY_DN102442_c0_g1_i1	0	0	1	0	0	0	0	3	3	0	3	0	0	0	1	2	AT5G14240	Q4KLJ8	PF02114	PTHR45809|PTHR45809:SF3
TRINITY_DN10244_c3_g1_i3	24.849	47.627	21.248	76.073	52.884	25.564	76.232	74.083	42.635	33.98	31.996	40.054	55.973	48.312	24.918	67.54			PF02892
TRINITY_DN10244_c3_g1_i6	1.151	7.373	10.752	7.857	11.116	4.436	21.873	25.917	22.021	6.444	13.088	18.129	15.439	21.688	16.247	18.975			PF02892
TRINITY_DN102458_c0_g2_i1	0	0	0	0	0	0	1	0	0	0	0	0	0	0	1	0		Q5AK62
TRINITY_DN102462_c1_g1_i1	40	17	22.035	19	10	118	12	20	14	6	9	11	6	7	12	7	AT3G10960	Q9SRK7	PF00860	PTHR43337:SF12|PTHR43337
TRINITY_DN102468_c0_g1_i1	0	0	0	0	0	0	0	0	1	0	2	0	0	0	2	3	AT5G02610	Q8L805	PF00831	PTHR45722|PTHR45722:SF9
TRINITY_DN10247_c0_g1_i1	10.364	43.503	20.914	80.161	83.827	59.82	47.486	60.031	65.572	59.954	59.386	42.53	20.64	43.661	48.47	52.972	AT4G04955	Q94AP0	PF01979	PTHR43668|PTHR43668:SF2
TRINITY_DN10247_c0_g1_i2	1.786	3.812	13.99	0	25.298	1.724	7.078	0	0	4.451	1.973	8.766	0	9.172	3.344	0	AT4G04955	Q94AP0	PF01979	PTHR43668|PTHR43668:SF2
TRINITY_DN10247_c0_g1_i6	7.558	3.791	2.859	7.044	21.802	0	0	5.726	14.807	0	0	0	0	9.061	3.329	5.213	AT4G04955	Q94AP0	PF01979	PTHR43668|PTHR43668:SF2
TRINITY_DN10247_c0_g1_i7	429.412	383.833	471.634	784.642	683.852	507.209	668.444	627.021	487.687	523.595	436.64	311.704	553.36	478.105	371.867	639.815	AT4G04955	Q94AP0	PF01979	PTHR43668|PTHR43668:SF2
TRINITY_DN10247_c0_g1_i9	47.88	4.061	35.603	29.153	35.82	11.247	59.225	40.416	14.934	0	0	0	0	0	0	0	AT4G04955	Q94AP0	PF01979	PTHR43668|PTHR43668:SF2
TRINITY_DN102492_c0_g1_i3	0	0	0	0	0	0	0	0	0	0	0	0	0	0	0	0
TRINITY_DN10249_c0_g1_i1	3.262	29.452	0	0	0	2.226	0	0	0	0	0	0	0	0	0	0	AT2G40620	O22873	PF00170	PTHR13690:SF122|PTHR13690
TRINITY_DN10249_c0_g1_i2	4.516	0	0	0	0	0	0	0	0	0	0	0	0	0	0	0	AT2G40620	O22873	PF00170	PTHR13690:SF122|PTHR13690
TRINITY_DN10249_c0_g1_i4	0	0	0	0	0	0	0	0	0	3.374	0	0	8	0	0	0	AT2G40620	Q6S4P4	PF00170	PTHR13690:SF122|PTHR13690
TRINITY_DN10249_c0_g1_i6	47.222	122.657	3	1	0	42.774	0	0	0	0	0	0	0	2	1	0	AT2G40620	Q6S4P4	PF00170	PTHR13690:SF122|PTHR13690
TRINITY_DN10249_c0_g1_i7	0	0	0	0	0	0	0	0	0	0	0	0	0	0	0	0	AT2G40620	Q6S4P4	PF00170	PTHR13690:SF122|PTHR13690
TRINITY_DN10249_c0_g1_i8	0	0	0	0	0	0	0	0	0	14.626	0	0	0	0	0	0	AT2G40620	Q6S4P4	PF00170	PTHR13690|PTHR13690:SF122
TRINITY_DN10249_c0_g1_i9	0	0	0	0	0	0	0	0	0	0	1	0	0	0	0	0	AT2G40620	O22873	PF00170	PTHR13690|PTHR13690:SF122
TRINITY_DN1024_c0_g1_i3	21.13	34.482	3.841	7.482	5.563	15.272	20.027	9.587	0	1.768	0	1.801	0	4.253	0	0	AT4G32180	Q8L5Y9	PF01937|PF03630	PTHR12280|PTHR12280:SF39
TRINITY_DN1024_c0_g1_i4	1746.97	1818.88	1428.03	2661.92	2213.45	1466.3	2717.26	1971.49	1453.55	1231.04	1218.59	1104.89	1042.13	1299.69	992.798	1452.61	AT4G32180	Q8L5Y9	PF01937|PF03630	PTHR12280:SF39|PTHR12280
TRINITY_DN1024_c0_g1_i5	15.909	69.221	22.852	42.071	29.241	21.049	27.497	31.41	0	0	0	0	0	0	0	0	AT4G32180	Q8L5Y9	PF03630|PF01937	PTHR12280:SF39|PTHR12280
TRINITY_DN1024_c0_g1_i8	198.917	876.404	240.051	282.327	326.273	330.236	227.582	286.914	199.228	194.411	212.412	192.308	159.891	132.056	167.202	230.39	AT4G32180	Q8L5Y9	PF03630|PF01937	PTHR12280:SF39|PTHR12280
TRINITY_DN102502_c0_g2_i1	0	0	0	0	0	0	0	0	0	0	0	0	0	0	0	0	AT2G37270	P46782	PF00177	PTHR11205:SF34|PTHR11205
TRINITY_DN102502_c1_g1_i1	0	0	0	0	0	0	0	0	0	0	0	0	2	0	0	0	AT2G37270	Q24186	PF00177	PTHR11205|PTHR11205:SF34
TRINITY_DN10250_c0_g1_i4	530.106	2236.01	288.274	623.624	657.623	382.243	1165.84	580.502	723.075	542.324	485.075	544.402	1593.39	972.803	574.755	1184.19	AT5G56710	Q9M573	PF01198	PTHR10956|PTHR10956:SF40
TRINITY_DN10250_c0_g1_i5	92.779	200.822	24.599	49.803	53.214	53.233	85.121	57.775	27.684	31.55	29.94	27.13	81.626	40.357	29.396	41.849	AT5G56710	Q9M573	PF01198	PTHR10956:SF38|PTHR10956
TRINITY_DN10250_c0_g1_i7	639.115	1567.1	346.127	627.573	442.162	454.791	823.956	466.723	155.241	128.125	116.984	140.468	389.031	213.84	150.849	243.965	AT5G56710	Q9M573	PF01198	PTHR10956|PTHR10956:SF40
TRINITY_DN10251_c0_g1_i3	39	12	16	26	15	18	19	17	7	5	7	24	5	12	4	5	AT4G13750	F4JTS8		PTHR32387:SF13|PTHR32387
TRINITY_DN10252_c0_g1_i1	0	0	0	0	0	0	0	0	0	4.928	7.069	2.013	22	9.612	3.861	2.057	AT1G20720
TRINITY_DN10252_c0_g1_i2	0	0	0	0	0	0	0	0	7.436	5.072	9.931	7.987	0	21.388	25.064	38.943	AT1G20720
TRINITY_DN10252_c0_g1_i4	0	9.505	2	0	0	1	0	2	13.564	0	0	0	0	0	0	0	AT1G20720
TRINITY_DN10252_c0_g1_i6	8	17.495	0	1	0	1	2	2	0	0	0	0	0	0	3.075	0	AT1G20720
TRINITY_DN10252_c1_g1_i3	0	4.213	1	0	0	0	0	0	0	0	0	2.037	0	0	0	0	AT1G20720	Q9BX63	PF06733|PF13307	PTHR11472:SF47|PTHR11472
TRINITY_DN10252_c1_g1_i7	5	16.787	0	2	0	1	0	0	0	0	1.06	0	0	0	1	0	AT1G20720	Q5SXJ3	PF06733|PF13307	PTHR11472:SF47|PTHR11472
TRINITY_DN10252_c1_g1_i8	0	0	0	1	0	0	0	0	35.96	33.002	21.976	42.963	69.964	71.085	56.662	51.445	AT1G20720	Q9BX63	PF13307|PF06733	PTHR11472|PTHR11472:SF47
TRINITY_DN102538_c0_g1_i2	0	0	0	0	0	0	0	0	0	0	0	0	0	0	3	1		M2XZY2		PTHR33577|PTHR33577:SF1
TRINITY_DN10254_c0_g1_i3	44.354	63.979	31.416	79.08	62.045	13.9	66.234	24.519	0	0	0	0	0	0	0	0	AT5G66520	Q9FJY7	PF01535|PF01535|PF01535|PF13041|PF13041|PF14432	PTHR47928|PTHR47928:SF91
TRINITY_DN10254_c0_g1_i5	22.646	76.076	38.584	68.92	89.955	29.1	74.766	83.481	94	70.387	112	90	135	69	96	95	AT5G66520	Q9FJY7	PF14432|PF01535|PF01535|PF12854|PF13041|PF13041	PTHR47928|PTHR47928:SF91
TRINITY_DN10254_c1_g1_i1	1	1	2	3	0	1	0	1	0	1	2	0	0	0	0	0	AT1G09190	O80488	PF13041	PTHR47928:SF148|PTHR47928
TRINITY_DN10256_c0_g1_i1	671.1	1410.76	516.408	1039.86	970.884	654.384	1121.27	981.781	444.618	369.474	365.833	451.025	539.125	469.547	397.934	450.886	AT5G06360	Q54GN8	PF01201	PTHR12642:SF6|PTHR12642
TRINITY_DN10256_c0_g1_i4	0	3.244	0	5.013	7.861	2.994	1.419	0	0	0	1.329	0	1.426	0	1.42	1.329	AT5G06360	Q54GN8	PF01201	PTHR12642|PTHR12642:SF6
TRINITY_DN10256_c0_g2_i3	2.745	0	1.592	9.131	9.256	5.623	4.568	1.528	3.296	0	9.043	7.848	6.846	7.841	0	3.817	AT5G06360	Q54GN8	PF01201	PTHR12642:SF6|PTHR12642
TRINITY_DN10256_c0_g2_i5	0	0	0	0	0	0	0	1.709	158.087	86.526	130.795	114.126	284.603	189.612	118.647	128.969	AT5G06360	Q54GN8	PF01201	PTHR12642|PTHR12642:SF6
TRINITY_DN10256_c1_g1_i1	1.584	11.726	5	3.951	8	10	7	4.467	4	6	2	4	5.164	7	5	1	AT2G29070	Q92890	PF03152	PTHR12555:SF21|PTHR12555
TRINITY_DN10256_c1_g1_i3	5.416	7.274	0	4.049	0	0	0	1.533	0	0	0	0	1.836	0	0	0	AT2G29070	Q92890	PF03152	PTHR12555|PTHR12555:SF21
TRINITY_DN10256_c1_g2_i5	0	4	2	3	5	2	6	3	0	0	0	0	0	1	0	0
TRINITY_DN102577_c0_g1_i2	4	5	0	1	0	0	3	37	4	16	0	3	9	9	1	15	AT5G52390		PF06521	PTHR33649|PTHR33649:SF2
TRINITY_DN102577_c0_g1_i3	202.647	165.423	17.983	39.261	21.204	135.866	21.294	66.662	41.639	120.352	44.654	39.907	52.82	112.933	23.517	101.651	AT5G52390		PF06521	PTHR33649|PTHR33649:SF2
TRINITY_DN102577_c0_g1_i5	22.946	60.703	6.339	0	5.223	28.1	17.245	14.435	27.1	79.077	8.346	25.32	26.914	32.332	20.062	36.747	AT5G52390		PF06521	PTHR33649:SF2|PTHR33649
TRINITY_DN102577_c0_g1_i9	44.575	37.874	7.678	2.739	6.574	67.034	21.462	17.903	19.261	39.571	0	6.773	7.266	27.735	2.42	23.602	AT5G52390		PF06521	PTHR33649|PTHR33649:SF2
TRINITY_DN102580_c0_g1_i1	0	0	0	0	0	2	0	0	0	0	0	0	0	0	0	0
TRINITY_DN102582_c0_g2_i1	0	0	0	4	0	3	0	0	0	0	0	0	0	0	0	0		Q136V6	PF02565|PF11967	PTHR33991
TRINITY_DN102583_c0_g1_i1	0	1	0	0	0	0	0	0	0	0	0	0	0	0	0	0	AT2G03820	G0S488	PF04981	PTHR12746:SF2|PTHR12746
TRINITY_DN102584_c0_g1_i2	0	0	0	0	0	0	0	0	0	0	0	0	0	0	0	0
TRINITY_DN10258_c0_g1_i1	82	289.994	15	5.496	8	54	4.397	6	0	2.368	0	5.343	2.606	2.096	0	0	AT5G42330			PTHR37259|PTHR37259:SF2
TRINITY_DN10258_c0_g1_i10	0	0	0	12.504	0	0	5.357	0	19	46.632	34.043	60.657	99.591	97.904	28.992	18	AT5G42330			PTHR37259:SF2|PTHR37259
TRINITY_DN102590_c0_g1_i2	1	0	3	1	0	0	0	1	0	0	0	0	0	0	0	0		O53554	PF02776	PTHR18968:SF86|PTHR18968
TRINITY_DN102590_c2_g1_i3	1	0	0	2	6	0	1	2	0	0	0	0	0	0	0	0		O53554	PF02775	PTHR18968|PTHR18968:SF86|PTHR18968|PTHR18968:SF86
TRINITY_DN1025_c0_g1_i1	722.272	1417.21	221.146	327.299	225.497	588.837	104.191	159.539	214.143	698.48	296.863	162.435	297.119	334.211	166.258	124.668	AT1G31420	C0LGF4	PF08263|PF00069|PF13855	PTHR45974:SF4|PTHR45974
TRINITY_DN1025_c0_g1_i11	790.568	880.245	137.146	101.713	130.687	453.936	154.987	199.62	0	0	0	0	0	0	0	0	AT1G31420	C0LGF4	PF00069|PF13855|PF08263	PTHR45974:SF4|PTHR45974
TRINITY_DN1025_c0_g1_i12	0	0	0	0	0	0	0	0	0	0	0	11.095	19.761	0	0	0	AT1G31420	C0LGF4	PF08263|PF00069	PTHR45974:SF4|PTHR45974
TRINITY_DN1025_c0_g1_i3	588.14	946.469	59.707	80.988	37.816	430.254	19.822	22.228	42.857	228.517	60.137	29.471	54.119	38.468	14.742	25.332	AT1G31420	C0LGF4	PF08263|PF00069	PTHR27006|PTHR27006:SF240
TRINITY_DN102619_c0_g1_i1	0	0	0	0	0	0	1	5	0	0	1	0	0	0	2	8
TRINITY_DN10261_c0_g1_i1	50.712	628.586	0	22	3	86.914	3	12	3	14.309	3	0	7	1	2	1.493	AT4G23740	Q9SUQ3	PF07714|PF08263|PF13855	PTHR48010|PTHR48010:SF6
TRINITY_DN10261_c0_g1_i6	6.288	36.414	1	0	0	3.086	0	0	0	9.691	0	0	0	0	0	3.507	AT4G23740	Q9SUQ3	PF00069	PTHR48010:SF6|PTHR48010
TRINITY_DN10263_c0_g1_i1	36.454	39.941	5.303	24.658	0	58.562	2.463	16.187	4.517	0	3.478	0	10.842	28.27	0	14.795	AT5G47730	F4JVA9	PF00650	PTHR46226|PTHR46226:SF5
TRINITY_DN10263_c0_g1_i10	56.046	61.254	25.269	73.457	88.769	41.57	46.339	77.348	5.94	4.807	6.192	4.531	2.006	11.086	2.705	0	AT1G12150	Q9FWW5	PF05701	PTHR32054|PTHR32054:SF42
TRINITY_DN10263_c0_g1_i2	0	0	0	2.537	18.699	0	0	0	0	0	0	0	0	2.579	0	0	AT5G47730	Q0V9N0	PF00650|PF03765	PTHR46226
TRINITY_DN10263_c0_g1_i4	0	9.787	0	0	0	0	0	0	0	0	0	0	0	0	0	0	AT1G55840	Q0V9N0	PF03765	PTHR46226:SF6|PTHR46226
TRINITY_DN10263_c0_g1_i6	953.634	1226.29	613.428	1109.68	905.011	1138.93	804.213	644.465	637.301	721.595	370.33	552.843	481.152	305.065	199.295	399.205	AT5G47730	Q0V9N0	PF00650|PF03765	PTHR46226:SF5|PTHR46226
TRINITY_DN10263_c0_g1_i9	0	0	0	0	22.521	0	0	0	0	12.598	0	5.626	0	0	0	0	AT5G47730	F4JVA9	PF00650	PTHR46226:SF5|PTHR46226
TRINITY_DN102649_c0_g1_i1	7	2	1	7	4	6	1.004	10	1	1	1	1	0	0	0	3	AT5G40010
TRINITY_DN10266_c0_g1_i1	149	263.189	131.392	294.001	204.01	140	288.997	247.603	26.11	43.782	63.283	28.899	67.147	75.929	37.043	60.333
TRINITY_DN10266_c0_g1_i2	0	0	0	0	0	0	0	0	82.89	25.218	3.717	26.101	34.853	63.071	26.957	57.667
TRINITY_DN10266_c1_g1_i1	44.713	0	0	137.583	0	0	47.717	0	22.343	0	0	2.705	5.361	6.27	0	0	AT4G33620	Q0WKV8	PF02902	PTHR47764:SF5|PTHR47764
TRINITY_DN10266_c1_g1_i2	99.66	133.606	86.401	118.417	141.057	83.236	213.283	102.584	104.722	54.41	103.327	69.223	65.639	119.73	86	128.592	AT4G33620	Q0WKV8	PF02902	PTHR47764|PTHR47764:SF5
TRINITY_DN10266_c1_g1_i4	13.627	53.394	45.599	0	65.97	10.764	0	51.416	8.935	15.59	3.673	11.072	0	0	0	13.408	AT4G33620	Q0WKV8	PF02902	PTHR47764:SF5|PTHR47764
TRINITY_DN10266_c1_g2_i2	47	49	35.608	72	42	39	62	37.065	26	27	21	23	38	42	22	24	AT4G33620	Q0WKV8		PTHR47764:SF5|PTHR47764
TRINITY_DN10267_c0_g1_i1	149.879	473.715	103.403	181.877	221.018	171.151	161.723	196.741	149.694	150.698	118.832	126.768	135.89	192.13	85.02	139.607	AT1G51040	Q9C680	PF00454	PTHR10048|PTHR10048:SF105
TRINITY_DN10268_c0_g1_i1	0	0	0	10.064	0	0	33.038	0	0	0	0	0	0	0	0	0	AT3G10180	F4J2K4	PF00225	PTHR47968:SF6|PTHR47968
TRINITY_DN10268_c0_g1_i10	17	96.408	26.258	54.61	62.458	6.066	0	29.742	11	1.656	1.889	9.826	0	3.753	11	5.117	AT3G10180	F4J2K4	PF00225	PTHR47968|PTHR47968:SF6
TRINITY_DN10268_c0_g1_i6	0	14.594	0	18.983	5.262	0	27.65	10.258	0	0	0	0	6	0	0	0	AT3G10180	F4J2K4	PF00225	PTHR47968:SF6|PTHR47968
TRINITY_DN10268_c0_g1_i8	0	0	15.742	27.342	47.279	15.934	13.312	0	0	2.344	14.111	14.174	0	2.247	0	4.883	AT3G10180	F4J2K4	PF00225	PTHR47968|PTHR47968:SF6
TRINITY_DN102690_c0_g1_i1	0	0	0	0	0	0	0	0	1	5	0	1	0	0	0	2	AT1G01470	P46518	PF03168	PTHR31459:SF19|PTHR31459
TRINITY_DN102692_c0_g1_i2	0	0	0	0	0	0	0	0	0	0	0	0	0	0	1	1			PF04043	PTHR31890:SF9|PTHR31890
TRINITY_DN10269_c0_g1_i1	24	55	25	44	43	23	36	22	26	22	26	8	27	67	22	31	AT1G74580	Q9CA58	PF12854|PF01535|PF01535|PF01535|PF13041|PF13041|PF13041|PF13041|PF13041|PF13041|PF13041	PTHR47941|PTHR47941|PTHR47941:SF5|PTHR47941:SF5|PTHR47941:SF5|PTHR47941:SF5|PTHR47941:SF5|PTHR47941|PTHR47941|PTHR47941
TRINITY_DN1026_c0_g1_i2	0	0	0	0	0	0	0	0	0	0	0	0	0	0	0	0	AT3G13300	Q9LTT8	PF16529	PTHR15598|PTHR15598:SF10
TRINITY_DN1026_c0_g1_i4	0	0	3.707	0	0	4.939	0	0	0	0	0	0	0	0	0	0	AT3G13300	Q9LTT8	PF16529	PTHR15598:SF10|PTHR15598
TRINITY_DN1026_c0_g1_i5	154.445	475.755	134.417	165.633	130.005	170.291	239.202	209.341	433.283	251.305	296.713	223.901	247.921	325.335	286.61	376.02	AT3G13300	Q9LTT8	PF16529	PTHR15598|PTHR15598:SF10
TRINITY_DN1026_c0_g1_i6	62.05	130.833	19.183	30.303	16.985	79.079	17.379	20.4	12.578	11.513	0	7.183	8.363	4.123	6.884	15.328	AT3G13300	Q9LTT8	PF16529	PTHR15598|PTHR15598:SF10
TRINITY_DN1026_c0_g1_i8	686.786	498.744	477.698	899.581	887.014	558.735	656.425	515.265	230.14	337.182	233.298	342.916	266.716	313.542	191.506	260.652	AT3G13300	Q9LTT8	PF16529	PTHR15598:SF10|PTHR15598
TRINITY_DN102710_c0_g1_i1	0	0	0	0	0	0	0	0	0	0	0	0	0	0	0	0		Q00858	PF08447|PF00320	PTHR47429:SF5|PTHR47429:SF5|PTHR47429|PTHR47429
TRINITY_DN102710_c0_g1_i2	0	0	0	0	0	0	0	0	0	0	0	0	0	0	0	0		Q00858	PF00320|PF08447	PTHR47429:SF5|PTHR47429:SF5|PTHR47429|PTHR47429
TRINITY_DN102716_c0_g2_i2	0	0	0	1	0	0	4	0	2	0	0	0	1	1	1	3	AT3G22060
TRINITY_DN10272_c0_g1_i10	53.178	30.524	35.751	125.825	68.349	25.884	77.415	89.795	90.656	50.503	64.375	81.522	53.263	40.774	31.393	0	AT3G09360	P29056	PF07741	PTHR11618|PTHR11618:SF4
TRINITY_DN10272_c0_g1_i12	180.185	214.237	139.06	175.192	75.035	148.2	148.462	130.298	78.529	55.819	115.983	18.414	49.733	58.364	92.116	123.978	AT3G09360	Q92994	PF00382|PF00382	PTHR11618:SF4|PTHR11618
TRINITY_DN10272_c0_g1_i13	122.727	208.383	90.261	224.806	171.05	147.985	186.312	182.65	117.312	83.782	133.676	95.233	61.06	118.89	89.279	99.916	AT3G09360	P29056	PF07741	PTHR11618|PTHR11618:SF4
TRINITY_DN10272_c0_g1_i7	209.783	205.655	161.646	291.634	458.194	280.427	374.216	219.01	251.865	236.982	168.098	191.485	189.316	241.766	189.158	294.047	AT3G09360	Q8CFK2	PF07741|PF00382|PF00382	PTHR11618:SF4|PTHR11618
TRINITY_DN10272_c0_g1_i8	229.127	283.365	122.282	280.544	190.782	127.513	184.599	138.714	96.623	97.914	116.803	115.347	64.628	104.207	70.054	54.059	AT3G09360	Q8CFK2	PF07741|PF00382|PF00382	PTHR11618|PTHR11618:SF4
TRINITY_DN102730_c0_g1_i1	0	0	0	3	2	0	1	4	0	0	0	0	0	0	0	0	AT3G06810	P95280	PF00441|PF02771|PF02770	PTHR43292:SF3|PTHR43292
TRINITY_DN102736_c0_g1_i2	0	0	0	0	0	0	0	1	0	0	0	0	0	0	0	0
TRINITY_DN10273_c0_g1_i1	119.755	293.72	112.611	250.843	246.154	217.616	190.821	239.645	140.349	220.79	210.544	111.926	136.38	228.527	144.568	249.283	AT5G32440		PF02845	PTHR31245:SF18|PTHR31245
TRINITY_DN10273_c0_g1_i2	448.72	679.802	331.907	507.025	596.24	543	435.767	366.355	267.706	459.298	319.176	253.692	394.383	483.47	326.147	483.041	AT5G32440		PF02845	PTHR31245|PTHR31245:SF18
TRINITY_DN10273_c0_g1_i3	3.525	6.193	1.481	25.132	6.606	1.384	4.707	0	0	2.912	1.279	1.382	6.237	6.003	1.285	2.677	AT5G32440		PF02845	PTHR31245:SF18|PTHR31245
TRINITY_DN102765_c0_g1_i1	0	0	0	0	0	0	1	15	0	0	4	0	0	0	3	7		Q7SFB0	PF16862	PTHR36183|PTHR36183:SF4
TRINITY_DN102766_c1_g1_i1	2	2	2	5	3	1	4	1	0	0	0	0	0	0	0	0	AT1G02940	Q9P6M1	PF00043|PF02798	PTHR43900|PTHR43900:SF24
TRINITY_DN10276_c1_g1_i11	0	0	0	0	0	0	0	0	0	0	0	0	0	0	0	0	AT1G50030	Q9FR53	PF11865	PTHR11139|PTHR11139:SF112
TRINITY_DN10276_c1_g1_i16	30.173	71.943	68.195	68.488	39.36	64.031	83.178	26.939	88.544	18.606	19.274	57.672	14.412	30.768	18.768	61.164	AT1G50030	Q9FR53	PF08771|PF00454|PF11865|PF02259	PTHR11139:SF112|PTHR11139
TRINITY_DN10276_c1_g1_i17	143.977	0	96.746	79.976	204.149	0	116.421	78.911	208.294	200.256	0	143.675	170.642	146.328	110.438	114.518	AT1G50030	Q9FR53	PF02260|PF00454|PF08771|PF02259	PTHR11139|PTHR11139:SF112
TRINITY_DN10276_c1_g1_i4	202.485	88.543	134.252	294.807	107.724	175.75	170.29	44.774	57.029	0	184.481	99.425	88.148	218.917	0	112.18	AT1G50030	Q9FR53	PF11865	PTHR11139|PTHR11139:SF112
TRINITY_DN10276_c1_g1_i5	18.151	31.317	13.765	57.346	52.001	12.349	38.08	43.028	9.819	4.096	12.397	9.112	12.986	31.562	5.868	3.716	AT1G50030	Q9FR53	PF02259	PTHR11139|PTHR11139:SF112
TRINITY_DN10276_c1_g1_i6	1620.61	2064	2026.63	3937.68	3379	1927.68	3413.78	3123.77	2173.31	1558.33	1861.67	1648.12	1548.25	2719.78	1554.73	1841.42	AT1G50030	Q9FR53	PF02259|PF08771|PF00454|PF02260	PTHR11139:SF112|PTHR11139
TRINITY_DN10276_c1_g1_i8	754.692	273.308	351.42	628.235	779.573	517.269	287.637	451.707	0	180.819	169.312	272.002	88.562	334.867	142.193	0	AT1G50030	Q9FR53	PF02259|PF02260|PF08771|PF00454|PF11865	PTHR11139:SF112|PTHR11139
TRINITY_DN102775_c0_g1_i2	0	0	0	0	0	0	0	0	0	0	0	0	0	0	0	0		O13978	PF07855	PTHR13292|PTHR13292:SF0
TRINITY_DN102776_c0_g1_i1	0	0	0	0	0	0	1	5	0	0	0	0	0	0	0	1		B8M9J5	PF00596	PTHR10672|PTHR10672:SF38
TRINITY_DN102788_c0_g1_i1	1	0	0	0	0	1	1	2	0	0	0	0	0	0	0	0	AT1G32350	Q9P429	PF01786	PTHR31803:SF3|PTHR31803
TRINITY_DN10278_c1_g1_i3	4107.16	3348.15	757.92	945	787	3909.39	560.994	801.1	401	1738	560.278	400	317	213	498.397	355	AT1G04220	Q5XEP9	PF08541|PF08392	PTHR31561|PTHR31561:SF147
TRINITY_DN10279_c0_g1_i1	4897.18	9605.46	8	3.172	5	4622.09	12	4	1	5.891	2	1	0	5	0	0		O50001	PF00407	PTHR31213|PTHR31213:SF17
TRINITY_DN10279_c0_g1_i3	0	0	0	2.828	0	0	0	0	0	8.109	0	0	0	0	0	0		O50001	PF00407	PTHR31213:SF17|PTHR31213|PTHR31213|PTHR31213:SF17
TRINITY_DN1027_c0_g1_i10	421.002	444.45	391.506	674.371	557.044	343.538	432.188	470.809	265.848	136.807	266.184	186.255	151.954	384.852	171.198	138.993	AT1G04010	Q4VCM1	PF02450	PTHR11440|PTHR11440:SF86
TRINITY_DN1027_c0_g1_i11	151.453	78.004	98.686	168.907	150.092	83.718	76.871	112.938	26.851	40.183	43.398	55.833	26.066	105.586	40.826	28.399	AT1G04010	Q4VCM1	PF02450	PTHR11440|PTHR11440:SF7
TRINITY_DN1027_c0_g1_i15	44.877	70.036	62.436	45.075	83.864	21.744	56.858	22.253	27.301	14.009	15.417	11.913	10.98	16.562	10.976	8.609	AT1G04010	Q4VCM1	PF02450	PTHR11440|PTHR11440:SF86
TRINITY_DN10280_c0_g1_i1	21.156	21.623	7.327	3.278	1.652	15.956	0	0	0	0	0	0	0	0	0	0	AT2G19930	O82188		PTHR23079|PTHR23079:SF13
TRINITY_DN10280_c0_g1_i10	7.265	0	0	36.386	20.358	0	12.679	25.714	14.199	6.151	0	5.127	2.743	1.275	11.049	0	AT2G19930	O82188	PF05183	PTHR23079|PTHR23079:SF13
TRINITY_DN10280_c0_g1_i11	0	0	0	0	0	7.09	0	0	7.877	3.606	19.372	0	0	0	0	7.703	AT2G19910	O82188	PF05183	PTHR23079|PTHR23079:SF13
TRINITY_DN10280_c0_g1_i13	3.009	0	0	0	0	1.565	1.529	1.574	0	2.24	4.764	0	0	2.213	2.187	0	AT2G19930	Q5QMN5		PTHR23079|PTHR23079:SF13
TRINITY_DN10280_c0_g1_i2	38.952	31.824	18.885	2.84	0	0	0	8.321	0	0	0	0	0	0	0	0	AT2G19930	O82188	PF05183	PTHR23079|PTHR23079:SF13
TRINITY_DN10280_c0_g1_i3	67.456	106.968	34.015	0	0	44.158	0	0	0	0	0	0	0	0	0	0	AT2G19930	O82188	PF05183	PTHR23079:SF13|PTHR23079:SF13|PTHR23079|PTHR23079
TRINITY_DN10280_c0_g1_i9	5.16	16.655	24.774	32.496	48.99	14.233	12.792	23.391	33.924	25.003	48.864	41.873	14.257	34.512	24.764	25.297
TRINITY_DN102817_c0_g1_i2	0	0	0	0	0	0	0	0	0	0	0	0	0	0	0	0		Q5QQ53	PF01822	PTHR24269|PTHR24269:SF22
TRINITY_DN10281_c0_g1_i2	433	601	361	641	469	418	663	598	263	312	234	334	276	189	277	364	AT1G64190	Q9SH69	PF00393|PF03446	PTHR11811:SF51|PTHR11811
TRINITY_DN10282_c0_g1_i1	284.498	438.308	306.566	395.169	433.52	236.49	427.574	419.856	548.156	543.408	754.586	833.249	1112.35	819.076	719.136	573.874	AT4G13200	Q8LDV3		PTHR35745
TRINITY_DN10282_c0_g1_i2	90.191	111.805	110.545	232.598	132.511	56.159	100.546	154.955	2.424	0	2.169	2.267	5.693	11.976	2.389	0	AT4G13200	Q8LDV3		PTHR35745
TRINITY_DN10282_c0_g1_i3	20.311	37.887	20.888	40.246	46.969	16.352	48.082	22.822	79.42	51.592	99.958	69.484	111.955	116.558	83.475	80.126	AT4G13200	Q8LDV3		PTHR35745
TRINITY_DN10284_c0_g1_i1	45.5	140.84	51.776	154.376	133.452	167.196	132.545	147.011	0	32.848	39.771	46.661	70.378	23.398	0	83.167	AT1G54380	O42260	PF04938	PTHR12794:SF0|PTHR12794
TRINITY_DN10284_c0_g1_i2	114.548	134.16	106.224	166.624	113.548	69.824	152.455	67.989	145	92.152	56.229	66.339	73.622	146.602	93	82.833	AT1G54380	O42260	PF04938	PTHR12794:SF0|PTHR12794
TRINITY_DN10284_c0_g2_i1	90.177	69	62	166	142	102	162	115	95	70	105	93	113	108	84	125	AT1G54380	Q54KN2	PF14111|PF04938	PTHR12794|PTHR12794:SF0
TRINITY_DN102860_c0_g1_i1	0	0	0	0	0	0	0	4.023	0	0	1	0	0	0	1	3
TRINITY_DN102860_c0_g1_i2	0	0	0	0	0	0	0	3.977	0	0	0	0	0	0	0	0
TRINITY_DN10287_c0_g1_i10	351.355	344.874	61.749	106.846	68.317	574.523	60.658	64.149	27.737	139.494	50.054	28.504	14.871	20.524	22.508	19.303	AT1G30320		PF03763	PTHR31471:SF49|PTHR31471
TRINITY_DN10287_c0_g1_i2	23.779	48.126	17.251	22.154	37.683	16.477	35.343	23.851	13.263	6.506	13.946	23.496	10.129	8.476	14.492	19.697	AT3G24255		PF00078	PTHR33116|PTHR33116:SF39
TRINITY_DN102883_c0_g1_i1	0	0	4	0	0	1	6	2	1	0	0	0	0	0	3	7
TRINITY_DN10289_c1_g1_i2	2	5	9	19	25	4	8	16	10	5	9	9	9	15	5	7
TRINITY_DN1028_c0_g1_i1	60	55	21	35	35	43	79	27.002	0	0	0	0	0	0	0	0
TRINITY_DN102921_c0_g2_i1	21	13	19	30	8	17	17	17	0	11	1	5	1	2	3	1	AT5G15130	Q9LXG8	PF03106	PTHR31429|PTHR31429:SF85
TRINITY_DN102927_c1_g2_i1	0	0	1	0	0	0	0	12	0	1	2	0	0	0	3	0		Q04336	PF03200	PTHR10412|PTHR10412:SF10
TRINITY_DN10292_c0_g1_i4	458.877	974.069	68.623	88.628	82.469	323.842	43	46.049	59	148	29	50.202	52	29	8	34	AT2G12400			PTHR31414|PTHR31414:SF13
TRINITY_DN10292_c0_g1_i5	34.394	133.183	4.377	37.407	7.531	68.754	0	0	0	0	0	13.798	0	0	0	0	AT2G12400			PTHR31414:SF13|PTHR31414
TRINITY_DN102948_c0_g1_i5	0	0	4	5	1	0	10	6	0	0	0	0	0	0	0	0		Q1DLP2	PF00018	PTHR14167
TRINITY_DN102951_c0_g1_i1	0	0	0	0	0	0	0	0	0	0	0	0	0	0	0	0	AT1G05000	P53965	PF03162	PTHR31126:SF0|PTHR31126
TRINITY_DN102951_c0_g1_i2	0	0	0	0	0	0	0	0	0	0	0	0	0	0	0	0	AT1G05000	P53965	PF03162	PTHR31126:SF0|PTHR31126
TRINITY_DN10295_c0_g1_i1	3.546	2.428	6.862	15.813	17.947	9.598	12.779	16.948	8.972	0	6.537	15.323	32.949	22.49	5.397	32.871		P47979	PF00642	PTHR12547:SF142|PTHR12547
TRINITY_DN10295_c0_g1_i4	4.454	7.572	12.138	65.187	41.053	3.402	93.221	40.052	17.028	16	10.463	16.677	6.051	13.51	22.603	25.129		P47980	PF00642|PF00642	PTHR12547|PTHR12547:SF142
TRINITY_DN102965_c0_g1_i1	0	0	0	0	0	0	0	0	0	0	0	0	0	0	0	0
TRINITY_DN102969_c0_g1_i1	4	9	0	0	0	20	0	0	0	0	0	0	0	0	0	0
TRINITY_DN102978_c0_g2_i3	0	0	0	0	0	0	0	0	0	0	0	0	0	0	0	0
TRINITY_DN10297_c0_g1_i1	4	8	116	134	119	2	55	137	122	202	327.667	128	84	62.999	65	36	AT4G25830	Q5K4H9	PF04535	PTHR11615:SF241|PTHR11615
TRINITY_DN10297_c0_g2_i4	247.173	249.074	455	624.091	609	259	258.575	387	310	294	316	171	339	192	213	196	AT4G25830	Q5K4H9	PF04535	PTHR11615:SF241|PTHR11615
TRINITY_DN102980_c0_g1_i1	0	0	0	0	0	0	1	7	5	0	1	0	1	0	1	3		G4YEI5	PF00857	PTHR14119:SF3|PTHR14119
TRINITY_DN102987_c0_g1_i1	0	0	0	0	0	0	1	0	0	0	0	0	0	0	0	0	AT1G54870	O07575	PF13561	PTHR48107|PTHR48107:SF15
TRINITY_DN10298_c0_g1_i12	38.338	37.511	6.014	16.29	0	13.364	6.432	0	0	0	6.411	0	0	0	0	0	AT1G73750			PTHR11005:SF102|PTHR11005
TRINITY_DN10298_c0_g1_i14	0	0	2.474	0	12.216	7.806	0	0	0	7.323	0	0	0	0	0	0	AT1G73750			PTHR11005|PTHR11005:SF102
TRINITY_DN10298_c0_g1_i15	0	0	1.546	9.477	11.007	0	8.006	3.51	2.275	0	0	0	0	10.721	0	8.173	AT1G73750			PTHR11005|PTHR11005:SF132
TRINITY_DN10298_c0_g1_i18	44.27	42.699	26.778	29.445	28.053	26.211	41.515	13.964	31.801	34.639	27.419	39.403	34.809	27.888	24.332	49.827	AT1G73750			PTHR11005|PTHR11005:SF132
TRINITY_DN10298_c0_g1_i2	21.946	34.803	5.836	17.833	17.683	16.841	3.691	0	0	2.28	7.333	6.519	7.422	0	0	0	AT1G73750			PTHR11005:SF132|PTHR11005
TRINITY_DN10298_c0_g1_i4	3.917	0	0	0	0	0	25.284	10.49	4.626	0	8.836	8.078	10.769	10.391	0	0	AT1G73750			PTHR11005:SF102|PTHR11005
TRINITY_DN10298_c0_g1_i6	95.523	74.987	16.353	41.955	57.041	81.777	14.072	13.036	11.297	9.759	0	0	0	0	13.668	0	AT1G73750			PTHR11005:SF132|PTHR11005
TRINITY_DN1029_c0_g1_i1	75	85	12	4	2	125.91	1	1	19	70	13.829	6	2	0	0	0	AT1G71970		PF05097	PTHR33696|PTHR33696:SF1
TRINITY_DN1029_c0_g1_i3	2	11	1	2	0	5	3	1	1	4	0	0	2	1	0	4	AT1G22680			PTHR33696:SF1|PTHR33696
TRINITY_DN102_c0_g1_i1	311.943	307.889	365.764	621.039	539.832	413.788	413.242	524.335	222.581	243.768	226.085	223.832	130.856	184.299	184.2	207.995	AT2G26280	O64843		PTHR46651
TRINITY_DN102_c0_g1_i10	264.152	222.974	436.842	800.972	470.193	303.026	488.436	600.299	342.216	260.757	307.35	307.001	163.674	257.176	241.955	350.739	AT2G26280	O64843		PTHR46651
TRINITY_DN102_c0_g1_i11	1412.94	1525	2232.11	2979.31	2135.85	1713.59	2316.37	2090.78	1222.04	1349	1186.82	1039.02	641.035	865.492	853.955	1149.82	AT2G26280	O64843		PTHR46651
TRINITY_DN102_c0_g1_i12	200.414	418.999	194.506	635.974	574.923	320.839	296.767	403.159	192.711	100.005	135.038	81.274	53.17	112.625	75.976	110.986	AT2G26280	O64843		PTHR46651
TRINITY_DN102_c0_g1_i15	925.999	767.852	611.6	1810.6	1289.73	1160.01	704.642	1315.13	457.555	137.028	342.738	242.013	196.213	281.218	164.694	175.279	AT2G26280	O64843		PTHR46651
TRINITY_DN102_c0_g1_i16	245.641	280.456	418.51	1164.69	843.814	386.686	915.106	925.361	486.84	80.307	324.874	308.358	91.616	224.929	223.055	200.019	AT2G26280	O64843		PTHR46651
TRINITY_DN102_c0_g1_i4	1035.13	829.868	1767.8	3267.47	2349.53	1218.34	2479.21	2733.38	1550.99	1246.4	1315.57	1375.4	713.455	918.284	1083.16	1314.17	AT2G26280	O64843	PF08590	PTHR46651
TRINITY_DN103006_c0_g1_i2	1	0	3	8	11	3	3	15	0	0	0	0	0	0	0	0		Q00461	PF13546	PTHR33627
TRINITY_DN103007_c0_g1_i2	0	0	0	0	0	0	0	0	0	0	0	0	0	0	0	0
TRINITY_DN103010_c0_g1_i1	0	0	0	0	0	0	0	1	0	0	0	0	0	0	0	0				PTHR42069
TRINITY_DN10301_c0_g1_i7	615.376	452.952	2000.35	3397.83	2804.92	2549.13	1659.96	4086.43	2240.4	2264.99	965.835	952.167	585.397	405.865	432.718	975.683	AT5G15840	Q96502	PF00643	PTHR31319:SF72|PTHR31319
TRINITY_DN10301_c0_g1_i9	161.912	253.048	132.347	366.193	256.079	1329.62	175.639	677.497	479.6	712.357	138.165	108.833	427.603	342.135	159.282	467.317	AT5G15840	Q96502	PF00643	PTHR31319:SF72|PTHR31319
TRINITY_DN103035_c0_g2_i1	0	0	0	0	0	0	0	1	0	0	2	0	0	0	1	16	AT3G60245	Q751L1	PF01780	PTHR48188
TRINITY_DN10304_c0_g1_i10	7.109	0	6.978	0	5.848	0	5.717	8.905	0	4.182	7.692	0	0	5.952	0	1.65	AT2G25220	Q0V7T5	PF00069	PTHR27001:SF71|PTHR27001
TRINITY_DN10304_c0_g1_i11	0	0	7.662	4.188	0	0	0	0	0	0	0	0	0	0	0	0	AT2G25220	Q0V7T5	PF00069	PTHR47989|PTHR47989:SF17
TRINITY_DN10304_c0_g1_i3	2.971	26.581	0	12.243	6.837	9.274	12.818	0	5.261	8.61	2.319	2.393	0	0	2.661	0	AT2G25220	Q0V7T5	PF00069	PTHR47989|PTHR47989:SF17
TRINITY_DN10304_c0_g1_i4	79.116	28.027	30.182	38.745	72.166	68.179	37.654	53.646	28.87	123.229	55.99	37.607	63.105	46.942	23.448	32.911	AT1G80640	Q0V7T5	PF00069	PTHR47989:SF17|PTHR47989
TRINITY_DN10304_c0_g1_i6	2.34	19.851	4.882	14.961	0	11.002	1.811	0	2.869	0	0	0	2.895	0	0	0	AT1G80640	Q0V7T5		PTHR47989|PTHR47989:SF17
TRINITY_DN10304_c0_g1_i9	7.406	9.541	5.297	13.863	10.149	1.545	0	3.45	0	1.98	0	0	0	2.106	1.891	7.44	AT1G80640	Q0V7T5	PF00069	PTHR47989:SF17|PTHR47989
TRINITY_DN103053_c0_g1_i2	0	0	0	0	0	0	2	0	0	0	0	0	0	0	2	7		Q10316	PF04699	PTHR12644
TRINITY_DN10305_c0_g1_i11	3524.77	2760.48	7223.95	9733.43	4810	3123.33	6956.8	7070.97	5473.59	2553.71	4052.85	4434.85	1687.07	3920.55	3204.52	3300.52	AT5G01850	Q9ZQ31	PF07714	PTHR23257|PTHR23257:SF864
TRINITY_DN10305_c0_g1_i4	1451.17	1050.18	2409.72	3303.26	2325.91	1268.92	2645.89	2383.64	916.463	498.769	691.23	781.945	326.855	703.683	516.989	577.987	AT5G01850	Q9ZQ31	PF07714	PTHR23257|PTHR23257:SF864
TRINITY_DN10305_c0_g1_i5	38.419	34.298	69.013	220.3	181.819	35.249	102.717	174.79	64.059	12.759	14.496	18.939	6.121	13.849	19.378	24.912	AT5G01850	Q9ZQ31	PF00069	PTHR23257|PTHR23257:SF864
TRINITY_DN10305_c0_g1_i6	27.647	24.655	115.141	176.555	153.831	37.658	155.605	223.765	65.416	19.017	44.399	48.494	31.959	37.34	30.222	75.583	AT5G01850	Q2MHE4	PF07714	PTHR23257|PTHR23257:SF864
TRINITY_DN103095_c0_g1_i1	0	0	0	0	0	0	0	0	1	0	0	0	0	0	0	3				PTHR37849
TRINITY_DN103095_c0_g1_i2	0	0	0	0	0	0	0	0	0	1	1	0	0	0	0	0				PTHR37849
TRINITY_DN1030_c0_g1_i1	347.656	542.031	244.729	557.405	518.389	294.449	420.608	442.735	131.612	94.265	122.925	86.981	70.108	169.872	64.188	78.846	AT3G14240	Q9LUM3	PF17766|PF02225|PF00082	PTHR42884|PTHR42884:SF4
TRINITY_DN1030_c0_g1_i11	0	0	0	0	0	15.093	0	0	0	0	0	0	0	0	0	0	AT3G14240	Q8VWI7	PF00225	PTHR24115|PTHR24115:SF926
TRINITY_DN1030_c0_g1_i12	0	0	0	0	6.521	0	0	1.597	0	1.978	0	0	0	0	0	0	AT3G14240	Q8VWI7	PF00225	PTHR24115:SF926|PTHR24115
TRINITY_DN1030_c0_g1_i2	172.929	163.268	70.91	137.208	84.83	150.434	43.584	56.423	31.085	20.051	38.718	47.8	14.925	35.41	27.034	22.155	AT2G31870	Q9SKB3	PF05028	PTHR12837:SF13|PTHR12837
TRINITY_DN1030_c0_g1_i3	2.167	211.043	0	0	0	0	0	0	3.668	5.206	0	0	0	0	0	0	AT3G14240	Q8VWI7	PF00225	PTHR24115|PTHR24115:SF926
TRINITY_DN1030_c0_g1_i6	13.694	0	3.447	0	0	0	0	0	0	4.5	0	0	0	0	2.156	0	AT3G14240	Q8VWI7	PF00225	PTHR24115|PTHR24115:SF926
TRINITY_DN1030_c0_g1_i7	10.125	472.424	0	2.211	1.395	10.257	0	9.961	0	0	1.126	2.22	3.959	0	0	0	AT3G14240	Q8VWI7	PF00225	PTHR24115:SF926|PTHR24115
TRINITY_DN1030_c0_g1_i8	0	0	0	0	0	11.322	0	0	0	0	0	0	0	0	0	0	AT3G14240	Q9LUM3	PF17766|PF00082|PF02225	PTHR42884:SF4|PTHR42884
TRINITY_DN1030_c0_g1_i9	0	396.976	0	0	0	6.46	0	0	0	0	0	0	0	0	0	0	AT3G14240	Q8VWI7	PF00225	PTHR24115:SF926|PTHR24115
TRINITY_DN1030_c4_g1_i1	0	2	0	3	0	1	0	0	288.464	97	264.425	166	258.001	341.649	148.504	152
TRINITY_DN103107_c0_g2_i1	0	0	0	0	0	0	0	6	1	0	0	1	0	0	0	4			PF10236
TRINITY_DN103128_c0_g1_i2	0	0	0	0	0	0	0	0	0	0	0	0	0	0	0	0		P38355	PF03547	PTHR31794|PTHR31794:SF2
TRINITY_DN103128_c0_g1_i4	0	0	0	0	0	0	0	0	0	0	0	0	0	0	0	0		P38355	PF03547	PTHR31794|PTHR31794:SF2
TRINITY_DN10313_c0_g1_i1	1224.62	974.505	2152.54	4078.13	3269.61	1897.08	2951.92	4149.37	2241.73	2790.55	2256.39	2317.36	1212.82	1562.52	1471.56	1132.57	AT5G12470	Q94CJ5	PF11891	PTHR31620|PTHR31620:SF8
TRINITY_DN10313_c0_g1_i11	556.335	398.708	1159.16	1922.5	1469.09	846.701	1439.93	2140.65	140.44	181.391	105.071	99.085	72.071	88.973	92.998	91.825	AT5G12470	Q94CJ5	PF11891	PTHR31620:SF8|PTHR31620
TRINITY_DN10313_c0_g1_i12	591.865	750.516	764.1	1277.46	929.726	797.581	1357.78	1165.69	1323.79	1248.49	1063.54	1028.62	779.111	769.506	876.48	1051.38	AT2G23780	Q09463	PF13923	PTHR12313:SF47|PTHR12313
TRINITY_DN10313_c0_g2_i1	203.742	308	134	257	189	226.149	227.208	179	166	183	114	146	165	135	104	214	AT2G23780	Q91YT2	PF13923	PTHR12313:SF47|PTHR12313
TRINITY_DN10315_c0_g1_i1	805.041	996.579	683.117	1346.3	1149.04	750.435	912.748	820.348	203.261	169.491	194.279	268.737	113.981	202.127	179.876	191.191	AT1G60900	F1QBY1		PTHR23139|PTHR23139:SF119
TRINITY_DN10315_c0_g1_i2	0	0	0	0	0	0	0	0	0	0	1.968	0	0	0	2.126	0		O23212		PTHR23139|PTHR23139:SF119
TRINITY_DN10315_c0_g1_i3	0	0	0	0	0	0	0	0	4.645	0	5	6	3.473	46.795	5	4.006				PTHR23139:SF119|PTHR23139
TRINITY_DN10315_c0_g1_i6	11	19	16	34	67	24	25	17.104	1.355	0	0	5.989	1.527	9.206	0	3.994		O23212		PTHR23139|PTHR23139:SF119
TRINITY_DN10315_c1_g1_i10	153.378	110.786	170.343	416.858	263.051	274.039	381.298	295.843	226.045	134.396	339.168	303.277	190.067	153.361	353.327	156.904	AT5G16440	Q39471	PF00293	PTHR10885|PTHR10885:SF14
TRINITY_DN10315_c1_g1_i11	653.637	1118.21	209.657	391.142	427.949	531.961	336.702	312.512	283.955	275.604	214.832	259.723	254.933	221.639	152.556	159.096	AT5G16440	Q39471	PF00293	PTHR10885|PTHR10885:SF14
TRINITY_DN10315_c3_g2_i1	26	419.158	0	0	0	10	0	0	0	6	2	2	0	0	0	0	AT5G46330	Q9FL28	PF13855|PF13855|PF13855|PF08263	PTHR27000:SF544|PTHR27000|PTHR27000|PTHR27000:SF544
TRINITY_DN10317_c0_g1_i1	111.606	118.392	31.644	43.203	49.613	0	64.225	67.419	12.642	0	0	0	0	22.883	25.49	20.763	AT1G10720		PF03909	PTHR31923:SF27|PTHR31923
TRINITY_DN10317_c0_g1_i2	0	0	0	6.53	0	0	0	0	0	0	11.689	6.328	0	0	0	0	AT1G10720		PF03909	PTHR31923:SF27|PTHR31923
TRINITY_DN10317_c0_g1_i3	0	7.888	0	43.58	32.751	90.613	0	0	0	67.213	10.855	7.696	0	0	0	0	AT1G10720		PF03909	PTHR31923:SF27|PTHR31923
TRINITY_DN10317_c0_g1_i4	53.394	65.72	21.405	58.688	64.635	53.433	94.775	41.54	19.228	27.787	2.456	8.976	25.131	18.117	12.51	25.62	AT3G49800			PTHR31923:SF27|PTHR31923
TRINITY_DN10317_c0_g1_i6	0	0	11.951	0	0	0	0	0	17.13	0	0	0	30.869	0	0	18.617	AT1G10720		PF03909	PTHR31923|PTHR31923:SF27
TRINITY_DN10317_c0_g2_i2	257.129	592.165	61	139	134.814	254.029	79	36.198	49	247.347	55	49	79	68	45	40	AT2G46710	Q8GYY5	PF00620|PF00786	PTHR23177:SF74|PTHR23177
TRINITY_DN10317_c0_g2_i3	2.88	25	0	0	2.186	0	0	1.802	0	0	0	0	0	0	0	0	AT2G46710	Q8GYY5	PF00786|PF00620	PTHR23177|PTHR23177:SF74
TRINITY_DN10317_c1_g2_i1	18	60	18	33	33	8	30	31	35	26	36	32	50	28	27	36	AT2G17570	Q8S2T1	PF01255	PTHR10291:SF18|PTHR10291
TRINITY_DN10317_c2_g1_i2	34.392	52.125	24.689	44.387	49.808	41.554	20.695	13.931	30.328	9.953	21.868	12.645	18.419	23.495	12.961	11.182	AT1G07980		PF00808	PTHR10252:SF93|PTHR10252
TRINITY_DN10317_c2_g1_i4	268.608	494.875	224.311	498.848	356.192	313.692	426.566	437.069	322.672	378.047	378.132	354.355	441.581	381.505	214.039	241.818	AT1G07980	Q9V452	PF00808	PTHR10252:SF93|PTHR10252
TRINITY_DN103187_c0_g1_i7	0	0	0	0	0	0	0	3	0	0	0	0	0	0	0	47	AT2G29350	P0C0Y5	PF13561	PTHR43008:SF3|PTHR43008
TRINITY_DN103196_c0_g2_i5	0	0	0	3	0	0	5	1	0	0	0	0	0	0	0	0		Q5U3N0	PF08718	PTHR10219|PTHR10219:SF25
TRINITY_DN10319_c0_g1_i2	691.988	2169.23	229.062	233.402	200.795	855.053	229.318	169.433	178.128	836	232.816	217.431	474.614	227.986	125.464	144.854	AT1G74690	Q8L4D8	PF00612|PF00612|PF13178	PTHR32295:SF42|PTHR32295
TRINITY_DN10319_c0_g1_i3	0	0	0	0	0	0	0	0	0	0	0	0	0	0	0	0	AT1G18840	Q8L4D8		PTHR32295:SF42|PTHR32295
TRINITY_DN10319_c0_g1_i4	17.037	7.507	0	4.258	3.792	4.442	1.33	0	2.932	0	1.194	0	0	0	0	1.146	AT1G74690	Q8L4D8	PF00612|PF00612	PTHR32295:SF42|PTHR32295
TRINITY_DN10319_c0_g1_i6	34.387	67.317	0	10.34	20.412	17.077	2.402	17.567	22.941	0	18.99	2.57	18.384	6.364	2.536	0	AT1G74690	Q8L4D8	PF13178	PTHR32295|PTHR32295:SF42
TRINITY_DN10319_c0_g1_i7	2.989	62.689	2.938	0	0	6.637	0	0	0	0	0	0	0	2.65	0	0	AT1G74690	Q8L4D8	PF00612|PF00612|PF13178	PTHR32295:SF42|PTHR32295
TRINITY_DN1031_c0_g2_i1	874.865	1450.79	463.444	989.798	824.027	1189.99	1030.89	730.227	474.574	559.71	337.418	456.066	470.288	468.924	372.072	529.383	AT3G62770	Q93VB2	PF00400	PTHR11227|PTHR11227:SF61
TRINITY_DN1031_c0_g2_i4	389.442	630.438	267.555	462.691	339.527	459.29	498.886	371.259	259.883	286.994	175.145	216.502	200.505	261.901	155.958	145.533	AT3G62770	Q93VB2	PF00400	PTHR11227:SF61|PTHR11227
TRINITY_DN1031_c0_g2_i5	1139.69	1384.03	1274.06	2527.82	1763.79	1144.72	2310.64	1815.5	1085.54	747.296	1021.44	1378.43	890.815	694.175	1303.97	1318.08	AT3G62770	Q93VB2	PF00400	PTHR11227:SF61|PTHR11227
TRINITY_DN1031_c2_g2_i1	959.567	815.052	457.664	759.315	389.997	629.486	624.803	593.638	243.518	166.031	172	203	190	229.669	205.838	243	AT3G51370	Q5Z8P0	PF00481	PTHR47992|PTHR47992:SF4
TRINITY_DN10320_c0_g1_i8	758.365	914.669	1098.44	1978.21	1498	947.389	1558	1778.7	982	783	1070	981	997	570	877	811	AT1G07080	Q9SV73	PF03227	PTHR13234|PTHR13234:SF60
TRINITY_DN10321_c0_g1_i5	2962.34	4734.55	1166	2238	2140.99	4117.03	1984	1783.93	780	1233	430	647	465	386.057	493	711	AT3G29075	Q9FKA5		PTHR33971:SF1|PTHR33971
TRINITY_DN10321_c2_g1_i1	162.289	247.76	233.251	440.88	310.622	179.443	355.58	270.137	144.494	160.769	200.791	165.555	189.306	323.692	153.342	113.776	AT4G29750	A7XN92	PF01985|PF01985|PF01985	PTHR31846|PTHR31846|PTHR31846:SF7|PTHR31846:SF7
TRINITY_DN10321_c2_g1_i3	0	0	0	0	10.236	1.961	0	5.026	0	0	0	0	0	0	3.924	0	AT4G29750	A7XN92	PF01985|PF01985	PTHR31846|PTHR31846:SF7
TRINITY_DN10321_c2_g1_i5	75.664	137.24	65.749	112.219	128.142	45.596	98.423	108.84	99.506	96.231	84.209	74.445	55.694	80.308	24.734	93.224	AT4G29750	A7XN92	PF01985|PF01985|PF01985	PTHR31846:SF7|PTHR31846:SF7|PTHR31846|PTHR31846
TRINITY_DN103227_c0_g1_i1	0	0	1	0	0	0	2	2	0	0	2	0	0	0	3	1	AT1G10840	Q0UMR2	PF01398	PTHR10410:SF3|PTHR10410
TRINITY_DN10322_c0_g1_i1	1286.03	2037	800	1537	1176.48	876	2193.46	1432	645	581.864	495	572	612	541	500	992
TRINITY_DN10324_c0_g1_i3	783.561	474.716	149.139	748.519	409.793	1231.17	551.394	313.012	287.569	100.54	81.49	429.174	313.892	529.081	235.06	259.632	AT4G17230	Q9M0M5	PF03514	PTHR31636|PTHR31636:SF45
TRINITY_DN10324_c0_g1_i4	825.444	518.439	205.862	696.401	459.583	1333.83	482.7	250.988	230.431	122.46	70.51	376.826	288.108	508.919	228.94	232.368	AT4G17230	Q9M0M5	PF03514	PTHR31636:SF45|PTHR31636
TRINITY_DN103258_c1_g1_i1	0	0	0	3	0	0	5	5	0	0	2	0	0	0	1	0			PF11338	PTHR40630
TRINITY_DN103259_c0_g1_i5	5	1	2	9	1	2	5	2	0	0	0	0	0	0	1	0	AT1G22170	P06134	PF01035|PF12833	PTHR10815|PTHR10815:SF13
TRINITY_DN10325_c0_g1_i1	106.916	10.454	0	16.308	12.677	127.625	8.808	11.336	14.388	198.992	21.213	9.866	5.794	0	6.444	4.951	AT4G27435		PF06749	PTHR31769|PTHR31769:SF56
TRINITY_DN10325_c0_g1_i2	2194.61	410.512	466	219.716	142.323	2174.9	106.192	162.664	183.612	6888.12	368.787	203.134	132.206	128	114.556	104.049	AT4G27435		PF06749	PTHR31769:SF56|PTHR31769
TRINITY_DN10325_c0_g2_i2	1341.02	1917.36	166.624	34.955	26.952	1205.49	14.549	29	41	1874.76	138	16	23.41	6	5	6	AT3G15480		PF06749	PTHR31769|PTHR31769:SF56
TRINITY_DN10325_c0_g2_i3	433.016	587.786	46.487	6.045	13.048	401.965	2.451	0	0	149.291	0	0	3.59	0	0	0	AT3G15480		PF06749	PTHR31769|PTHR31769:SF56
TRINITY_DN10326_c0_g1_i1	0	31.123	0	0	0	0	0	0	0	0	1	0	0	0	0	0	AT1G69770	Q94F88	PF00145	PTHR10629:SF50|PTHR10629
TRINITY_DN10326_c0_g1_i2	3	14.917	14	22.58	11	3	18.287	11.284	1	2	0	1	1	0	1	2	AT1G69770	Q94F88	PF00145	PTHR10629:SF50|PTHR10629
TRINITY_DN10326_c0_g1_i3	0	0	0	4.42	0	0	0	2.324	0	0	0	1	0	2	0	0	AT1G69770	Q8LPU5	PF00145	PTHR10629:SF50|PTHR10629
TRINITY_DN10327_c0_g1_i1	4	1	0	1	1	4	2	0	0	0	0	0	0	1	0	1	AT2G22880	Q9SZG3	PF05678	PTHR34794:SF1|PTHR34794
TRINITY_DN10327_c0_g2_i1	122	252.775	103.975	147.012	138.203	73	297.377	143.666	152.743	104	156.158	143.808	365.075	232.086	171.992	284.062	AT2G22870	O81004	PF01926	PTHR11649:SF75|PTHR11649
TRINITY_DN10327_c0_g2_i2	0	16.225	4.025	17.988	12.797	0	14.623	13.334	13.257	0	6.842	11.192	9.925	6.914	2.008	1.938	AT2G22870	O81004	PF01926	PTHR11649|PTHR11649:SF75
TRINITY_DN103289_c0_g1_i1	0	0	0	0	0	0	0	7	0	1	1	0	0	0	1	2		P86242	PF03330	PTHR31836
TRINITY_DN103294_c0_g1_i1	14	17	0	3	0	40	0	0	0	7	0	0	0	0	0	0	AT3G50140	Q9SD53	PF03140	PTHR31549|PTHR31549:SF191
TRINITY_DN1032_c0_g1_i3	482.768	838.618	61.418	48.735	33.858	399.802	2.622	15.031	10.441	112.746	38.614	5	11.366	8	0	23.165	AT5G56890	Q8RWW0	PF07714	PTHR47989:SF45|PTHR47989
TRINITY_DN1032_c0_g1_i5	363.037	289.266	45.582	18.265	15.142	259.275	11.378	5.969	1.559	47.41	11.386	0	4.634	0	5	4.835	AT5G56890	Q8RWW0	PF07714	PTHR47989|PTHR47989:SF45
TRINITY_DN1032_c1_g1_i10	0	0	0	0	0	15.92	63.612	29.69	77.552	105.016	117.715	0	53.601	39.596	109.577	161.217	AT4G38890	O49459	PF02365	PTHR31079|PTHR31079:SF20
TRINITY_DN1032_c1_g1_i11	157.947	52.335	285.668	485.737	288.687	147.658	547.699	676.592	249.154	156.53	305.569	300.752	209.627	134.858	171.842	189.51	AT4G34740	Q9STG9	PF13537|PF00156	PTHR11907:SF21|PTHR11907
TRINITY_DN1032_c1_g1_i12	26.974	8.677	23.694	49.063	35.314	0	0	0	0	0	0	155.102	0	0	0	0	AT4G38890	O49459	PF02365	PTHR31079|PTHR31079:SF20
TRINITY_DN1032_c1_g1_i13	662.69	983.659	580.636	1260.02	908.887	699.191	1078.88	830.644	528.177	335.38	495.598	343.115	574.718	819.389	535.175	684.176	AT4G38890	Q9STG9	PF00156|PF13537	PTHR11907|PTHR11907:SF21
TRINITY_DN1032_c1_g1_i15	33.096	38.597	23.331	82.062	93.3	44.907	56.789	49.734	41.637	65.805	48.657	25.465	59.435	79.775	116.85	94.904	AT4G34740	Q9STG9	PF00156|PF13537	PTHR11907:SF21|PTHR11907
TRINITY_DN1032_c1_g1_i16	33.402	60.454	57.067	139.701	81.041	14.828	60.962	74.387	26.801	7.331	29.945	13.755	22.038	25.379	11.423	0	AT4G38890	Q9T0J6	PF01207	PTHR45846:SF1|PTHR45846
TRINITY_DN1032_c1_g1_i18	0	0	0	0	0	0	0	0	0	0	0	0	0	0	0	9.98	AT4G38890	Q9T0J6	PF01207	PTHR45846|PTHR45846:SF1
TRINITY_DN1032_c1_g1_i3	609.913	803.049	208.894	508.366	388.187	563.859	695.6	413.009	227.604	235.153	186.678	207.588	194.799	207.733	65.237	120.705	AT4G38890	O49459	PF02365	PTHR31079|PTHR31079:SF20
TRINITY_DN1032_c1_g1_i5	223.35	287.718	173.704	254.008	160.631	207.576	279.501	198.311	153.451	105.356	108.838	0	126.783	173.056	105.903	225.372	AT4G38890	O49459	PF02365	PTHR31079:SF20|PTHR31079
TRINITY_DN103300_c0_g1_i2	0	0	0.5	0	0	0	1.359	0	0	0	0.5	0	0	0	0.5	0		P80235	PF00755	PTHR22589|PTHR22589:SF29
TRINITY_DN103300_c0_g1_i3	0	0	0.5	0	0	0	4.641	14	0	0	0.5	0	0	0	0.5	0		P80235	PF00755	PTHR22589|PTHR22589:SF29
TRINITY_DN10330_c0_g1_i1	281.012	269	443	884.16	751.844	247.041	480.4	660	527	566	530	623	628	530	478.251	497	AT1G70070	B9DFG3	PF08148|PF00270	PTHR12131:SF19|PTHR12131
TRINITY_DN10331_c0_g1_i11	58.163	86.251	32.365	121.732	112.365	58.027	56.705	95.224	75.546	82.581	87.263	36.741	72.05	99.738	33.515	112.655	AT1G16220	Q9SA22	PF00481	PTHR47992|PTHR47992:SF98
TRINITY_DN10331_c0_g1_i2	240.837	312.749	193.635	291.268	256.635	263.973	285.289	233.776	321.454	302.419	277.737	235.259	259.95	341.262	205.485	276.345	AT3G02750	Q9SA22	PF00481	PTHR47992:SF98|PTHR47992
TRINITY_DN10332_c0_g1_i1	275.993	50	47	3	0	346	1	1	0	554	17	0	1	0	0	1	AT2G27740		PF04949	PTHR21470|PTHR21470:SF16
TRINITY_DN10333_c0_g1_i12	409.003	684.154	514.002	984.03	804.166	428.656	941.434	819.695	118.814	39.391	100.892	85.818	141.037	63.411	68.498	68.937	AT4G31990	P46248	PF00155	PTHR11879:SF46|PTHR11879
TRINITY_DN10333_c0_g1_i13	0	1.312	0	4.862	0	1.524	1.42	0	0	0	1.572	0	0	0	4.036	0	AT4G31990	P46248	PF00155	PTHR11879|PTHR11879:SF46
TRINITY_DN10333_c0_g1_i14	0	1.509	1.526	13.559	4.69	1.956	0	3.713	1.687	1.876	3.876	0	0	4.627	0	0	AT4G31990	P46248	PF00155	PTHR11879|PTHR11879:SF46
TRINITY_DN10333_c0_g1_i5	389.497	856.936	442.465	1021.06	996.251	469.379	835.12	650.955	1733.36	1655.66	1683.86	1442.96	2431.48	1792.69	1420.39	1658.23	AT4G31990	P46248	PF00155	PTHR11879:SF46|PTHR11879
TRINITY_DN10333_c0_g1_i6	2.131	16.896	2.004	37.798	13.189	4.885	12.057	15.678	5.138	5.197	7.799	5.218	8.478	11.269	14.077	20.837	AT4G31990	P46248	PF00155	PTHR11879:SF46|PTHR11879
TRINITY_DN10336_c0_g1_i1	125.258	263.111	84	143	142	80.009	357	104	86	67	75	48	233	178.98	96	193.005	AT3G49080	Q8L6Z4	PF00380	PTHR21569|PTHR21569:SF1
TRINITY_DN10336_c1_g1_i2	148.342	763.636	9.946	49.18	31.778	42.187	31.723	23.343	0	0	19.044	14.245	0	0	13.95	0	AT3G12750	O81123	PF02535	PTHR11040|PTHR11040:SF71
TRINITY_DN10336_c1_g1_i3	119.609	736.8	46.027	43.087	21.274	41.931	4.718	24.683	27.687	22.507	11.436	19.408	16.063	19.094	11.352	14.131	AT3G12750	O81123	PF02535	PTHR11040|PTHR11040:SF71
TRINITY_DN10336_c1_g1_i4	21.049	47.108	13.027	14.733	8.948	8.882	14.559	3.974	14.313	5.493	11.519	1.347	2.937	2.906	1.698	4.869	AT2G32270	A3BI11	PF02535	PTHR11040|PTHR11040:SF71
TRINITY_DN10336_c2_g1_i1	102	107.492	75	88	90	58.167	147.001	75.504	33.493	21	34	13	9	23.536	27	20	AT4G27300	O81906	PF00069	PTHR27002:SF747|PTHR27002
TRINITY_DN103374_c0_g1_i1	0	0	0	0	0	0	0	2	0	0	0	0	0	0	0	0		Q4P7G1	PF12353	PTHR10352:SF34|PTHR10352
TRINITY_DN103374_c0_g1_i2	0	0	0	0	0	0	0	0	0	1	0	0	0	0	3	3	AT3G11400	Q4P7G1	PF00076|PF12353	PTHR10352:SF34|PTHR10352
TRINITY_DN10337_c0_g1_i1	0	0	0	0	16.843	4.37	8.74	20.472	5.624	12.436	15.061	27.504	3.04	9.291	0	6.518	AT5G64950		PF02536	PTHR13068|PTHR13068:SF173
TRINITY_DN10337_c0_g1_i2	90	68	55	95	90.157	63.63	102.26	60.528	58.376	52.564	49.939	65.496	78.96	72.709	60	76.482	AT5G64950	Q9FK23	PF02536|PF02536	PTHR13068|PTHR13068:SF173
TRINITY_DN10338_c0_g1_i1	375.003	1300.42	575.004	975.008	363	156	644.17	627.875	1004	768.028	1277	1176	1167	605.36	1643	938	AT5G52780	Q9LTD9	PF11947	PTHR34575:SF6|PTHR34575
TRINITY_DN10339_c0_g1_i1	9.536	2.033	11.033	11.538	0	9.408	0	0	5.953	11.893	13.996	0	14.885	5.5	6.018	8.144	AT3G20150	F4JDI6	PF00225	PTHR47968:SF15|PTHR47968
TRINITY_DN10339_c0_g1_i12	17.534	535.811	3.319	3.604	0	6.768	0.553	0	0	26.285	0	0.957	0	1.793	0	3.22	AT3G20150	F4JDI6	PF00225	PTHR47968:SF15|PTHR47968
TRINITY_DN10339_c0_g1_i13	26.281	34.734	0	0	2.089	7.844	0	3.954	0	0	0	0	1.143	0	0	0	AT3G20150	F4JDI6	PF00225	PTHR47968:SF15|PTHR47968
TRINITY_DN10339_c0_g1_i14	0	0	0	0	0	0	0	0	7	3.752	0	0	0	0	0	0	AT3G20150	F4JDI6	PF00225	PTHR47968:SF15|PTHR47968
TRINITY_DN10339_c0_g1_i16	0	0	12.204	0	0	0	0	0	0	0	0	2.25	0	0	0	0	AT3G20150	F4JDI6	PF00225	PTHR47968|PTHR47968:SF15
TRINITY_DN10339_c0_g1_i17	0	70.468	0	0	7.949	0	23.052	12.337	0	0	0	8.853	0	0	0	0	AT3G20150	F4JDI6	PF00225	PTHR47968|PTHR47968:SF15
TRINITY_DN10339_c0_g1_i19	23.393	542.523	0	0	0	0	3	0	0	0	0	0	0	0	0	0	AT3G20150	F4JDI6	PF00225	PTHR47968:SF15|PTHR47968
TRINITY_DN10339_c0_g1_i3	0	190.152	3.319	3.604	0	0	0.553	0	0	0	0	0.957	0	1.793	0	3.22	AT3G20150	F4JDI6	PF00225	PTHR47968:SF15|PTHR47968
TRINITY_DN10339_c0_g1_i4	0	0	0	0	0	15.978	0	0	0	0	0	0	0	0	0	0	AT3G20150	F4JDI6	PF00225	PTHR47968:SF15|PTHR47968
TRINITY_DN10339_c0_g1_i5	0	0	0	0	2.089	0	0	3.954	0	0	0	0	1.143	0	0	0	AT3G20150	F4JDI6	PF00225	PTHR47968|PTHR47968:SF15
TRINITY_DN10339_c0_g1_i6	42.889	0	144.846	260.293	126.872	0	64.727	104.755	73.498	54.613	82.501	41.734	31.461	68.995	43.257	40.491	AT3G20150	F4JDI6	PF00225	PTHR24115|PTHR24115:SF829
TRINITY_DN10339_c0_g1_i7	2.367	15.456	5.197	1.83	0	0	0	0	0	0	0	0	0	0	0	0	AT3G20150	F4JDI6	PF00225	PTHR24115|PTHR24115:SF829
TRINITY_DN10339_c0_g3_i1	12	21.691	9.087	14.155	7	5.002	16.101	4	42.75	14.708	35.502	15.266	28.368	29.919	28.724	31.888			PF13952|PF13960	PTHR10775|PTHR10775:SF156
TRINITY_DN10339_c5_g1_i2	2	4	0	0	0	0	0	0	0	0	0	0	0	0	0	0
TRINITY_DN1033_c0_g1_i1	0	0	1	0	0	1	0	0	0	0	0	1	0	0	0	0			PF00076	PTHR32343:SF44|PTHR32343
TRINITY_DN1033_c0_g1_i2	0	5.474	8.277	2.322	4.695	25.378	14.262	15.709	0	0	2.257	12.092	2.211	0	3.691	5		Q9LFD5	PF00076	PTHR32343|PTHR32343:SF44
TRINITY_DN1033_c0_g1_i3	17	9.526	6.723	31.678	17.305	32.622	21.738	11.291	3	6	8.743	2.908	1.789	11	5.309	0		Q9LFD5	PF00076	PTHR32343:SF44|PTHR32343
TRINITY_DN10342_c0_g2_i11	75	86.032	151	214	87	125	73	152	133	156	172	184	91	78.482	87	72
TRINITY_DN103434_c0_g1_i1	0	0	0	0	0	0	0	0	0	0	0	0	0	0	0	0	AT2G02050	Q9SKC9	PF05676	PTHR20900|PTHR20900:SF0
TRINITY_DN103434_c0_g1_i2	0	0	0	0	0	0	0	0	0	1	0	0	0	0	0	0	AT2G02050	Q9SKC9	PF05676	PTHR20900:SF0|PTHR20900
TRINITY_DN103447_c0_g1_i1	0	0	4	3	0	0	1	3	0	0	1	0	0	0	0	3		Q54TE3	PF00320	PTHR45658|PTHR45658:SF34
TRINITY_DN10347_c0_g1_i16	16.298	19.438	54.426	69.917	52.88	11.191	23.816	25.77	19.667	7.651	27.038	18.755	1.342	9.108	4.589	15.876	AT5G21930	B9DFX7	PF00122	PTHR43520
TRINITY_DN10347_c0_g1_i18	45.812	48.083	56.345	78.492	109.025	61.819	65.816	87.878	58.726	65.362	56.879	46.05	32.438	0	56.507	39.379	AT5G21930	B9DFX7	PF00122	PTHR43520
TRINITY_DN10347_c0_g1_i20	54.443	93.797	40.513	131.64	193.951	74.289	67.686	105.7	35.497	0	0	21.822	49.055	83.457	28.826	23.759	AT5G21930	B9DFX7	PF00122	PTHR43520
TRINITY_DN10347_c0_g1_i6	35.777	4.506	98.117	120.43	57.67	42.968	46.442	86.843	63.662	72.625	110.979	67.784	0	7.16	27.621	24.763	AT5G21930	B9DFX7	PF00122	PTHR43520
TRINITY_DN10347_c0_g1_i8	0	14.172	0	24.649	20.305	0	7.049	32.152	0	0	0	0	51.924	77.137	0	0	AT5G21930	B9DFX7	PF00122	PTHR43520
TRINITY_DN1034_c0_g1_i2	1109.97	4955.39	582.212	1156.96	1359.78	818.795	2290.72	998.568	630.369	759.518	468.5	445.319	2360.4	1320.24	425.32	1131.08	AT1G61580	P22738	PF00297	PTHR11363:SF13|PTHR11363
TRINITY_DN1034_c0_g1_i3	6.631	53.704	8.492	18.329	13.921	11.667	23.57	8.434	47.613	10.875	31.655	35.437	38.493	73.014	22.172	2.988	AT1G61580	P22738	PF00297	PTHR11363:SF13|PTHR11363
TRINITY_DN1034_c0_g2_i1	38.526	154.829	26.06	78.802	76.075	47.46	58.214	30	44.681	33.816	41.846	44.245	32.104	65.692	26.508	17.394	AT1G61580	P22738	PF00297	PTHR11363|PTHR11363:SF9
TRINITY_DN103500_c0_g1_i2	0	0	0	0	0	0	0	1	1	0	0	1	0	0	1	0	AT4G14147	Q641G7	PF05856	PTHR22629|PTHR22629:SF1
TRINITY_DN103502_c0_g1_i2	0	1	3	3	0	2	0	2	0	0	0	0	0	0	0	0			PF00892	PTHR22911|PTHR22911:SF65
TRINITY_DN10352_c0_g1_i3	0	21.922	2.456	5.32	2.335	0	0	13.363	3	0	0	1.578	0	0	0	0	AT2G39900	Q500W4	PF00412|PF00412	PTHR24206|PTHR24206:SF54
TRINITY_DN10352_c0_g1_i5	7	18.078	8.544	4.68	11.665	7	4	1.637	0	6	3	1.422	0	2	2	5	AT2G45800	Q9M047	PF00412	PTHR24206:SF54|PTHR24206
TRINITY_DN103530_c0_g1_i1	0	0	0	0	0	0	0	0	0	0	0	0	0	0	0	0		P55495	PF00199	PTHR36195|PTHR36195:SF4
TRINITY_DN103538_c0_g1_i1	1	0	0	4	1	4	0	4	0	0	0	0	0	0	0	0	AT2G41700	P0A191	PF00005	PTHR43820
TRINITY_DN10353_c0_g1_i1	3	3	0	3	2	0	23	2	2	2	2	0	11	4	3	10	AT5G25810	Q39127	PF00847	PTHR31985:SF5|PTHR31985
TRINITY_DN103549_c0_g1_i1	2	0	1	4	5	0	3	3	0	0	0	0	0	0	0	0			PF02321
TRINITY_DN103553_c0_g1_i1	0	0	0	0	0	0	3	11	1	0	0	0	0	0	2	0	AT5G11720	Q12558	PF01055	PTHR22762:SF133|PTHR22762
TRINITY_DN103557_c0_g1_i1	0	0	0	0	0	0	0	0	0	0	0	0	0	0	0	0
TRINITY_DN103563_c0_g1_i2	0	0	0	0	0	0	0	2	1	0	0	0	0	0	0	3	AT1G54870	O07575	PF13561	PTHR48107|PTHR48107:SF15
TRINITY_DN103565_c0_g1_i1	0	0	0	0	0	0	0	3	0	0	1	0	0	0	0	1	AT1G32990	P53875	PF03946|PF00298	PTHR11661|PTHR11661:SF1
TRINITY_DN10356_c0_g1_i1	276.097	304.306	187.614	463.103	379.593	205.155	376.08	213.475	68.353	73.341	82.459	115.495	67.698	94.985	69.198	73.504	AT3G49600	Q9SCJ9	PF00443	PTHR24006|PTHR24006:SF816
TRINITY_DN10356_c0_g1_i9	558.903	659.277	454.387	720.897	608.466	484.858	899.814	759.66	740.647	551.659	673.541	590.562	654.302	646.981	595.802	751.496	AT3G49600	Q9SCJ9	PF00443	PTHR24006:SF816|PTHR24006
TRINITY_DN103571_c0_g1_i2	0	0	0	0	0	0	0	0	0	0	0	0	0	0	0	0	AT5G66240	Q6NV31	PF00400	PTHR19861:SF0|PTHR19861
TRINITY_DN103575_c0_g1_i1	4	0	0	1	0	6	7	0	0	1	2	0	1	0	1	1	AT3G23290	Q9LMK2	PF04852	PTHR31165:SF41|PTHR31165
TRINITY_DN103578_c0_g1_i1	6	18	0	1	0	1	0	1	0	1	1	1	4	3	0	0
TRINITY_DN10357_c0_g1_i1	10.926	17.817	0	0	0	6.293	0	1.095	2.081	0	2.148	3.365	0	1.457	1	1.36	AT5G15350	Q39131	PF02298	PTHR33021:SF13|PTHR33021
TRINITY_DN10357_c0_g1_i2	94.074	329.183	10	7	3	68.707	1	4.905	6.919	28	8.852	7.635	10	4.543	1	1.64	AT5G15350	Q39131	PF02298	PTHR33021|PTHR33021:SF13
TRINITY_DN103580_c0_g1_i3	0	0	6	0	0	0	5	5.001	0	0	2	0	0	0	1	12	AT4G15000	P0C2H6	PF01777	PTHR10497|PTHR10497:SF0
TRINITY_DN10359_c0_g1_i1	21.591	26.849	5.536	20.673	20.36	11.56	46.477	37.081	27.649	20.777	25.24	16.531	52.426	51.578	28.814	43.4		Q7ZVJ6	PF01702	PTHR46064
TRINITY_DN10359_c0_g1_i12	23.364	48.79	14.452	61.237	27.815	27.002	79.152	11.896	9.142	0	0	10.526	10.956	10.811	1.692	4.307		B3RNT0	PF01702	PTHR46064
TRINITY_DN10359_c0_g1_i15	88.499	53.291	47.516	82.781	90.456	52.698	175.674	99.01	9.96	0	1.826	0	2.379	6.353	9.355	0		Q28DX0	PF01702	PTHR46064
TRINITY_DN10359_c0_g1_i18	93.516	164.708	43.339	122.676	97.739	51.745	168.201	107.043	64.249	33.797	62.934	38.943	126.238	116.258	60.139	111.471		Q5ZM96	PF01702	PTHR46064
TRINITY_DN10359_c0_g1_i4	2.631	7.024	0	0	1.808	0	12.887	0	0	2.427	0	0	0	0	0	1.822		B3RNT0	PF01702	PTHR46064
TRINITY_DN10359_c0_g1_i9	24.786	46.337	17.158	38.633	29.822	14.995	51.21	29.763	0	0	0	0	0	0	0	0		Q7ZVJ6	PF01702	PTHR46064
TRINITY_DN1035_c0_g1_i2	16.253	21.45	20.601	44.156	42.251	26.981	18.681	28.843	4.758	0	11.536	11.666	2.623	4.983	5.923	4.864	AT1G18390	P0C5E2	PF13947	PTHR33138:SF27|PTHR33138
TRINITY_DN1035_c0_g1_i3	109.908	88.842	60.764	297.191	240.591	103.603	272.378	264.157	361.699	145.356	173.885	165.172	65.095	171.993	168.82	181.46	AT1G18390	Q9C6K9	PF00069	PTHR46008:SF2|PTHR46008
TRINITY_DN1035_c0_g1_i4	9.695	27.895	7.626	7.319	8.133	6.982	10.43	5.053	6.21	2.351	7.579	12.199	8.172	7.615	4.257	14.454		P0C5E2	PF13947	PTHR33138|PTHR33138:SF27
TRINITY_DN1035_c0_g1_i5	9.241	11.994	113.392	72.969	124.038	0	139.559	24.946	0	15.293	0	19.964	100.111	86.548	0	75.221	AT1G18390	Q9C6K9	PF00069	PTHR46008|PTHR46008:SF2
TRINITY_DN1035_c0_g2_i1	556.915	405.724	479.308	727.373	488.732	606.958	600.349	411.511	0	0	0	0	0	0	0	0	AT2G23450	Q8RY67	PF00069	PTHR27005|PTHR27005:SF325
TRINITY_DN1035_c0_g2_i2	95.323	89.524	6.795	176.696	69.401	79.799	145.434	86.65	98.177	33.805	19.753	59.799	21.965	100.582	35.813	71.195	AT2G23450	Q8RY67	PF00069	PTHR27005|PTHR27005:SF325
TRINITY_DN1035_c0_g2_i4	1154.87	977.355	864.856	1609.62	1173.87	1027.22	1826.34	1132.46	1468.82	878.195	866.362	1004.2	714.477	1072.29	954.187	1595.81	AT2G23450	Q8RY67	PF12947|PF00069	PTHR27005|PTHR27005:SF325
TRINITY_DN103612_c0_g3_i1	0	0	0	0	0	0	1	0	0	0	0	0	0	0	0	0	AT5G19760	P0C582	PF00153|PF00153|PF00153	PTHR45618:SF9|PTHR45618
TRINITY_DN103612_c0_g3_i2	0	0	0	0	0	0	0	0	0	0	0	0	0	0	0	0	AT5G19760	P0C582	PF00153	PTHR45618|PTHR45618:SF9
TRINITY_DN103624_c0_g1_i1	0	0	0	0	0	0	0	0	0	0	0	0	0	0	0	0	AT4G25950	Q9SP55	PF03179	PTHR12713|PTHR12713:SF27
TRINITY_DN103626_c0_g1_i1	1	12	0	0	0	4	2	3	1	0	0	0	0	0	2	3	AT1G55180	Q9C888	PF00614|PF00614|PF12357	PTHR18896|PTHR18896:SF137
TRINITY_DN103629_c0_g1_i1	3	3	1	0	18	2	7	7	0	0	0	0	0	0	0	0	AT5G36880	Q8YBA4	PF00092	PTHR41248
TRINITY_DN10362_c0_g1_i2	13.5	152.959	2	0	0	0	0	0	3.5	1.993	1.543	0.5	0	2	0	0	AT1G18370	Q8S950	PF00225|PF11995	PTHR47968|PTHR47968:SF23
TRINITY_DN10362_c0_g1_i4	13.5	310.041	2	1	3	3.5	2	7	3.5	5.007	2.059	0	0	0	2	2	AT1G18370	Q8S950	PF11995|PF00225	PTHR47968|PTHR47968:SF23
TRINITY_DN10362_c0_g1_i5	0	0	0	0	0	3.5	0	0	0	0	3.398	0.5	0	0	0	0	AT1G18370	Q8S950	PF00225|PF11995	PTHR47968|PTHR47968:SF23
TRINITY_DN10362_c0_g2_i1	47	191	46	74	81	37	64	54	66	45	55	70	71	79	52	73	AT3G43210	Q8LNZ2	PF00225|PF11995	PTHR47968:SF39|PTHR47968
TRINITY_DN103637_c0_g1_i1	0	3	1	0	6	0	2	1	0	0	0	0	0	0	0	0		A4INR2	PF01451	PTHR43428
TRINITY_DN10364_c0_g1_i2	106.66	96	141.002	293.85	323.958	112	228.754	274.996	151.994	87	148	139.97	69.053	144.326	98	121.817	AT1G30470
TRINITY_DN103668_c0_g3_i1	0	0	0	0	0	0	0	0	0	1	0	3	2	1	2	0
TRINITY_DN10366_c0_g1_i1	0	0	3.947	0	2.315	2.508	2.615	0	0	0	0	0	0	0	0	0	AT5G52380	Q04832	PF00098	PTHR47798
TRINITY_DN10366_c0_g1_i2	23.496	3.085	0	36.334	0	4.35	31.368	7.48	8.987	4.308	8	1.849	15.219	13.038	15.369	11.06	AT5G52380			PTHR47798
TRINITY_DN10366_c0_g1_i3	0	0	2.577	2.406	4.411	0	0	0	7.013	0	0	13.151	27.279	29.962	5.631	24.94	AT5G52380			PTHR47798
TRINITY_DN10366_c0_g1_i5	21.558	15.408	9.345	22.927	14.283	13.142	24.281	21.188	0	2.692	0	0	5.502	0	0	0	AT5G52380	Q04832	PF00098	PTHR47798|PTHR47798
TRINITY_DN10366_c0_g2_i1	114	288	41	104	82	68	154	93	88	74	90	79	204	153	117	167	AT5G52380	Q9HFF2	PF00098|PF00098|PF14392|PF14392	PTHR47798
TRINITY_DN103684_c0_g2_i1	3	5	4	5	0	1	1	3	0	0	2	4	1	3	1	1
TRINITY_DN10368_c0_g1_i1	348.135	1030.74	367.426	736.267	858.682	316.322	950.332	928.241	325.683	272.673	296.681	369.43	579.594	349.215	297.858	407.841	AT1G14410	Q9M9S3	PF08536	PTHR31745:SF3|PTHR31745
TRINITY_DN10368_c0_g1_i5	10.117	30.637	11.574	14.418	26.019	15.678	11.621	12.894	84.317	58.327	63.319	62.57	93.406	67.785	92.142	95.159	AT1G14410	Q9M9S3	PF08536	PTHR31745|PTHR31745:SF3
TRINITY_DN103690_c0_g1_i1	1	8	0	8	4	1	4	14	0	0	0	0	0	0	0	0		Q8G2M8	PF00440|PF08361	PTHR30055:SF173|PTHR30055
TRINITY_DN1036_c0_g1_i1	68.31	25.311	47.888	54.403	45.752	98.813	61.783	38.924	56.076	41.918	22.741	31.049	19.383	37.883	16.079	55.904	AT5G62570	C0SVV6	PF07887	PTHR31713:SF14|PTHR31713
TRINITY_DN1036_c0_g1_i12	640.846	375.834	601.533	849.122	524.248	975.967	782.22	540.216	522.209	795.099	345.259	373.951	220.617	230.164	269.921	526.096	AT5G62570	C0SVV6	PF07887	PTHR31713|PTHR31713:SF14
TRINITY_DN1036_c0_g1_i4	218.207	164.981	182	184.104	234.53	232.63	271.001	241.988	93.288	216.156	105	109	100.8	242.408	110.124	182.734	AT5G62570	C0SVV6	PF07887	PTHR31713|PTHR31713:SF14
TRINITY_DN1036_c0_g1_i6	24.845	19.855	2.579	14.474	0	13.212	0	9.888	0	3.983	0	0	0	0	0	0	AT5G62570	C0SVV6	PF07887	PTHR31713:SF14|PTHR31713
TRINITY_DN1036_c0_g1_i7	11.79	55.019	0	3.896	52.47	15.507	25.999	0	25.712	24.844	0	0	14.2	122.592	5.876	27.266	AT5G62570	C0SVV6	PF07887	PTHR31713:SF14|PTHR31713
TRINITY_DN1036_c0_g1_i9	0	0	0	0	0	0	0	0	0	0	0	0	0	0	0	0	AT5G62570	C0SVV6	PF07887	PTHR31713:SF14|PTHR31713
TRINITY_DN103712_c0_g1_i1	1	1	0	4	3.028	2	4	6	0	0	0	0	0	0	0	0		Q03073	PF00115	PTHR10422|PTHR10422:SF29
TRINITY_DN10371_c0_g1_i10	62.43	60.442	3.914	8.087	41.192	49.526	15.173	7.277	27.713	11.265	11.198	23.272	23.311	17.368	24.726	51.489	AT4G21450	Q8LPQ7
TRINITY_DN10371_c0_g1_i13	740.895	1055.96	473.431	772.415	672.645	859.431	1004.97	669.931	864.653	771.812	675.258	693.003	605.306	722.103	783.44	1164.55	AT4G21450	Q8VYN2	PF00635	PTHR10809|PTHR10809:SF101
TRINITY_DN10371_c0_g1_i18	1211.29	2738.95	592.334	1153.24	1184.47	1121.11	1444.91	812.299	651.894	684.923	556.544	424.813	850.494	909.225	629.066	802.292	AT4G21450	Q8VYN2	PF00635	PTHR10809|PTHR10809:SF101
TRINITY_DN10371_c0_g1_i3	13.232	48.933	0	14.271	43.688	34.16	0	0	0	0	0	1.913	4.889	0	1.768	1.666	AT4G05060	Q8VYN2	PF00635	PTHR10809|PTHR10809:SF58
TRINITY_DN103734_c0_g1_i1	0	0	0	0	0	0	0	13	0	0	0	0	0	0	0	1		Q9ZNQ7	PF01679	PTHR21659:SF85|PTHR21659
TRINITY_DN103743_c0_g1_i1	0	0	0	0	0	0	0	2.244	0	0	0	0	0	0	0	0			PF02586
TRINITY_DN103743_c0_g2_i3	0	0	0	0	0	0	0	0	0	0	0	0	0	0	0	0			PF09228
TRINITY_DN103743_c0_g2_i4	4	11	4	24	19	2	7	10.756	0	0	0	0	0	0	0	0		O34311	PF00990|PF13185|PF00563	PTHR44757:SF2|PTHR44757
TRINITY_DN103747_c0_g1_i1	19	44	0	0	4	0	0	0	0	0	0	0	0	0	0	0	AT2G35330
TRINITY_DN103747_c0_g1_i3	0	0	2	4	0	10	0	3	0	7	0	1	1	0	0	0	AT2G35330
TRINITY_DN103748_c0_g1_i1	0	0	1	0	0	0	0	0	0	0	0	0	0	0	0	1				PTHR37534:SF10|PTHR37534
TRINITY_DN103749_c0_g1_i2	0	0	0	0	0	1	5	12	1	0	0	0	0	0	6	8
TRINITY_DN10374_c0_g1_i2	710	1882	228	450	516	693	577	396	224	428.055	132	230	451	486.005	126.938	253.001	AT3G46520	O81221	PF00022	PTHR11937:SF467|PTHR11937
TRINITY_DN103753_c0_g1_i1	0	0	0	0	0	0	0	2	0	0	0	0	0	0	1	11	AT1G60740	O14313	PF08534	PTHR10430:SF16|PTHR10430
TRINITY_DN103756_c1_g1_i1	1	0	1	1	2	1	3	0	0	0	0	0	0	0	0	0		P56653	PF03061	PTHR31793:SF9|PTHR31793
TRINITY_DN10375_c0_g1_i1	162.839	223.06	162.935	328.659	285.547	153.044	372.377	373.566	542.13	275.598	282.53	319.57	174.247	384.598	286.081	759.057	AT1G71900	Q9LNK7	PF05653	PTHR12570|PTHR12570:SF54
TRINITY_DN10375_c0_g1_i10	237.445	203.037	111.452	204.278	222.903	162.683	164.835	145.386	53.205	9.372	2.88	18.664	30.55	66.961	18.107	25.262	AT1G71900	Q9LNK7	PF05653	PTHR12570:SF76|PTHR12570
TRINITY_DN10375_c0_g1_i11	25	20	13	7	6	13	5	2	4	8	3	4	1	2	4	7	AT1G34470	Q9LNK7	PF05653	PTHR12570|PTHR12570:SF60
TRINITY_DN10375_c0_g1_i14	365.345	359.28	289.705	527.623	364.088	310.065	676.078	430.165	419.459	422.289	308.623	283.099	296.858	357.471	283.911	396.495	AT1G71900	Q94AH3	PF05653	PTHR12570|PTHR12570:SF76
TRINITY_DN10375_c0_g1_i2	49.048	18.23	8.959	27.927	12.124	52.776	25.619	14.685	3.903	19.943	6.871	5.942	3.923	1.706	0	1.999	AT1G71900	Q94AH3	PF05653	PTHR12570:SF54|PTHR12570
TRINITY_DN10375_c0_g1_i4	0	0	0	0	0	0	0	0	0	0	0	0	0	0	0	0	AT1G71900	Q9LNK7	PF05653	PTHR12570:SF54|PTHR12570
TRINITY_DN10375_c0_g1_i5	36.795	19.969	23.197	66.118	57.161	69.623	58.607	64.641	87.144	45.344	44.515	76.469	31.165	65.149	33.424	95.241	AT1G71900	Q9LNK7	PF05653	PTHR12570:SF76|PTHR12570
TRINITY_DN10375_c0_g1_i6	0	0	2.919	0	4.12	0	1.857	0	0	0	0	0	0	0	0	0	AT1G71900	Q9LNK7	PF05653	PTHR12570:SF76|PTHR12570
TRINITY_DN10375_c0_g1_i8	36.144	26.34	19.702	47.12	68.192	32.558	39.646	54.131	24.703	12.568	16.709	17.033	3.3	16.892	19.583	29.778	AT1G71900	Q9LNK7	PF05653	PTHR12570|PTHR12570:SF54
TRINITY_DN10375_c0_g1_i9	716.434	623.674	483.483	899.382	659.557	664.884	793.436	822.76	483.459	310.895	289.872	369.254	220.958	333.568	226.894	621.169	AT1G71900	Q9LNK7	PF05653	PTHR12570:SF54|PTHR12570
TRINITY_DN10375_c2_g1_i1	0	3.464	0	0	0	0	0	2	0	1	1	0	0	0	0	0	AT3G62100	Q9M1R4	PF02309	PTHR31734|PTHR31734:SF94
TRINITY_DN10375_c2_g1_i2	6	11.536	0	2	0	17	0	0	1	0	0	2	0	1	1	0	AT3G62100	Q9M1R4	PF02309	PTHR31734:SF94|PTHR31734
TRINITY_DN103762_c0_g1_i2	0	3	1	2	3	0	6	10	0	0	0	0	0	0	0	0	AT1G49820	Q9C6D2	PF01636	PTHR34273
TRINITY_DN103763_c0_g1_i1	0	2	3	4	0	0	2	5	0	0	0	0	0	0	0	0		P76115	PF00593	PTHR30069
TRINITY_DN103764_c0_g1_i3	0	0	0	0	0	0	0	0	0	0	0	0	0	0	0	0		K0E3U9	PF00083	PTHR48022|PTHR48022:SF77
TRINITY_DN103769_c0_g1_i1	0	0	0	0	0	0	0	0	0	0	0	0	0	0	0	0		Q9UTP4	PF01713|PF08590	PTHR47417:SF1|PTHR47417
TRINITY_DN103788_c0_g1_i6	0	0	0	0	0	0	0	0	0	0	0	0	0	0	0	0	AT3G29390	Q09911	PF00013	PTHR15744
TRINITY_DN103789_c0_g1_i1	0	0	0	0	0	0	0	0	0	0	0	0	0	0	0	0
TRINITY_DN10378_c0_g2_i1	211.266	227.019	294.799	470.805	433.551	189.893	430.089	379.629	156.602	94.226	144.91	94.551	70.025	105.331	86.643	106.752	AT5G22750	Q9FNI6	PF00176|PF08797	PTHR45626:SF22|PTHR45626
TRINITY_DN10378_c0_g2_i2	183.603	188.123	101.548	265.54	194.449	179.58	212.315	203.754	75.189	78.774	76.138	70.907	36.975	52.607	55.357	74.926	AT5G22750	Q9FNI6	PF00271|PF00176|PF08797|PF13920	PTHR45626|PTHR45626:SF22
TRINITY_DN10378_c0_g2_i8	2.13	10.859	1.653	11.656	0	9.527	0	1.618	10.209	0	0	2.542	0	7.062	0	5.322	AT5G22750	Q9FNI6	PF13920|PF08797|PF00176	PTHR45626:SF22|PTHR45626
TRINITY_DN103793_c0_g6_i1	0	0	0	0	9	1	0	3	0	0	0	0	0	0	0	0		P15877		PTHR32303|PTHR32303:SF4
TRINITY_DN103794_c0_g1_i2	0	0	0	0	0	0	0	0	0	0	0	0	0	0	0	0		Q12184
TRINITY_DN103794_c0_g1_i3	0	0	0	0	0	0	0	0	0	0	0	0	0	0	0	0	AT4G21090	Q12184	PF00111	PTHR23426
TRINITY_DN1037_c0_g1_i1	0	0	0	0	0	0	0	0	0	0	0	0	0	0	0	0	AT2G27810	Q3E7D0	PF00860	PTHR11119:SF28|PTHR11119
TRINITY_DN1037_c0_g1_i2	123.457	181.353	59.76	125.842	114.326	106.852	67.698	73.37	46.298	62.784	65.076	63.207	63.86	55.077	47.944	68.154	AT2G27810	Q3E7D0	PF00860	PTHR11119|PTHR11119:SF28
TRINITY_DN1037_c0_g1_i5	35.847	86.53	4.15	0	4.06	39.853	25.767	8.45	16.759	25.155	17.256	6.445	14.431	17.216	13.248	6.678	AT2G27810	Q3E7D0	PF00860	PTHR11119|PTHR11119:SF89
TRINITY_DN1037_c0_g1_i6	656.667	1299.38	218.124	279.158	201.614	689.298	219.716	139.181	117.944	327.061	192.668	100.348	279.709	246.707	144.808	163.168	AT2G27810	Q3E7D0	PF00860	PTHR11119|PTHR11119:SF28
TRINITY_DN10380_c0_g1_i2	468.741	791.748	730.048	1390	1784.15	2508.9	917.082	1072	829	3623.62	660.763	491	1970.6	955.657	851	2393	AT5G02160			PTHR36389
TRINITY_DN103810_c0_g1_i1	0	0	0	12	0	0	0	3	0	0	0	0	0	0	2	0
TRINITY_DN103816_c0_g1_i1	0	0	0	0	3	0	6	0	1	0	0	0	0	1	0	0	AT2G46170	O82352	PF02453	PTHR10994|PTHR10994:SF166
TRINITY_DN10381_c0_g2_i1	0	0	0	0	0	0	0	0	0	0	0	6.583	5.141	0	0	0	AT2G20340	Q0ZS27	PF00282	PTHR11999:SF96|PTHR11999
TRINITY_DN10381_c0_g2_i10	1.588	3.864	0	6.448	0	0	0	0	0	0	0	0	0	0	0	0	AT2G20340	Q0ZS27	PF00282	PTHR11999:SF96|PTHR11999|PTHR11999|PTHR11999:SF96
TRINITY_DN10381_c0_g2_i12	0	0	0	0	0	0	0	0	4.179	0	0	0	0	4.451	0	0	AT2G20340	Q0ZS27	PF00282	PTHR11999:SF96|PTHR11999
TRINITY_DN10381_c0_g2_i14	12.482	44.078	28.867	48.012	0	0	0	26.096	53.918	56.063	75.121	34.734	83.608	107.427	88	0	AT2G20340	Q0ZS27	PF00282	PTHR11999:SF96|PTHR11999
TRINITY_DN10381_c0_g2_i6	32.903	59.227	0	8.942	33.259	37.824	38.45	17.122	33.903	11.937	14.879	13.683	14.25	106.123	0	21.839	AT2G20340	Q0ZS27	PF00282	PTHR11999:SF96|PTHR11999
TRINITY_DN10381_c0_g2_i9	43.026	74.831	16.133	82.597	40.741	50.176	99.55	30.782	0	0	0	0	0	0	0	49.161	AT2G20340	Q0ZS27	PF00282	PTHR11999|PTHR11999:SF96|PTHR11999|PTHR11999:SF96
TRINITY_DN103820_c0_g1_i1	0	0	0	0	0	0	0	2	1	0	0	0	0	1	0	0	AT3G07490	Q9SRR7	PF13499|PF13499	PTHR10891|PTHR10891:SF901
TRINITY_DN103824_c0_g1_i1	0	0	0	0	0	0	0	0	0	0	0	0	0	0	0	0		P14187	PF01265	PTHR12743|PTHR12743:SF3
TRINITY_DN103826_c0_g1_i1	0	4	0	2	1	2	2	0	0	0	0	0	0	0	0	0		E9JFX9	PF00296	PTHR30011:SF16|PTHR30011
TRINITY_DN103829_c0_g1_i1	0	3	0	0	0	2	0	0	0	0	0	0	0	0	0	0		Q52996	PF03795	PTHR35174:SF3|PTHR35174
TRINITY_DN10384_c0_g1_i1	220.181	565.398	138.769	346.993	292.599	229.423	299.657	340.199	87.564	99.43	53.098	58.94	208.564	108.589	38.589	109.326	AT3G45770	Q54YT4		PTHR43981|PTHR43981:SF6
TRINITY_DN10384_c0_g1_i4	34.33	92.303	96.432	167.905	187.072	60.002	178.974	186.601	0	0	0	0	0	0	0	0	AT1G24290	Q8CG07	PF16193|PF00627|PF12002|PF00004	PTHR13779
TRINITY_DN10384_c0_g1_i5	113.458	118.299	153.799	243.941	149.329	98.579	192.369	229.169	163.436	126.57	153.902	129.06	151.438	141.411	137.411	146.674	AT1G24290	Q8CG07	PF16193|PF12002|PF00004|PF00627	PTHR13779
TRINITY_DN10384_c0_g1_i6	291	553.994	126	213	159	283	268	182.703	191	254	156	147	291.997	235	174	279	AT3G45770	Q54YT4		PTHR43981:SF6|PTHR43981
TRINITY_DN10385_c0_g1_i2	82.149	93.427	71.468	185.056	174.997	90.203	93.093	94.085	41.538	46.431	23.239	43.477	13.735	79.011	0	29.831	AT3G05350	Q9FZ33	PF00561	PTHR43329|PTHR43329:SF81
TRINITY_DN10385_c0_g1_i7	1005.3	1767.08	1362.54	2527.25	2082.95	1395.27	2016.3	2074.19	1439.46	1815.57	1323.76	1286.52	1528.27	1415.98	1151.95	1531.16	AT3G05350	Q8RY11	PF16188|PF16189|PF00557|PF01321	PTHR43763|PTHR43763:SF6
TRINITY_DN10385_c0_g1_i9	400.557	212.497	0	0	206.054	89.509	0	0	0	0	0	0	0	0	40.051	0	AT3G05350	Q8RY11	PF01321|PF00557|PF16189	PTHR43763|PTHR43763:SF6
TRINITY_DN10385_c0_g2_i1	7	13	12	31	9	7	10.446	3	3	5	7	1	5	4.008	6	3.005
TRINITY_DN103862_c0_g1_i1	0	0	0	3	3	0	2	2	0	0	0	0	0	0	0	0		Q6XL52	PF09339	PTHR30136|PTHR30136:SF33
TRINITY_DN103882_c0_g1_i1	0	0	0	1	15	0	2	5	0	0	0	0	0	0	0	0		Q7TNE1	PF02515	PTHR48207
TRINITY_DN103884_c0_g1_i1	0	0	0	0	0	0	1	0	0	0	0	0	0	0	0	0				PTHR42342
TRINITY_DN103884_c0_g1_i2	0	1	0	0	0	0	0	0	0	0	0	0	0	0	0	0				PTHR42342
TRINITY_DN103884_c0_g1_i3	0	0	0	0	0	0	0	0	0	0	0	0	0	0	0	0				PTHR42342
TRINITY_DN10388_c0_g1_i1	249.7	905.492	113.472	239.576	165.557	175.553	382.756	185.577	0	0	0	0	0	0	0	0	AT2G34480	Q9ATF5	PF01775	PTHR10052|PTHR10052:SF45|PTHR10052:SF45|PTHR10052
TRINITY_DN10388_c0_g1_i5	626.282	2112.56	398.887	893.47	839.105	634.82	1164.09	703.208	761.501	628.523	620.147	628.51	1698.4	954.36	529.219	1250.15	AT2G34480	Q9ATF5	PF01775	PTHR10052:SF45|PTHR10052:SF45|PTHR10052|PTHR10052
TRINITY_DN10388_c0_g1_i8	1298.63	4923.85	585.16	1248.87	1213.34	968.461	1895.95	930.222	970.499	768.477	815.853	793.49	2005.6	1214.23	760.781	1399.85	AT2G34480	Q9ATF5	PF01775	PTHR10052|PTHR10052|PTHR10052:SF45|PTHR10052:SF45
TRINITY_DN10388_c1_g1_i1	23.711	90.289	0	0	0	5.4	1.645	0	0	0	0	0	1.786	0	0	3	AT5G66460	Q9FJZ3	PF00150	PTHR31451|PTHR31451:SF43
TRINITY_DN10388_c1_g1_i2	922.883	3236.57	50	45	28	465.6	26.355	34	17	151	25	0	143.214	1	1	0	AT5G66460	Q9FJZ3	PF00150	PTHR31451:SF43|PTHR31451
TRINITY_DN10389_c1_g1_i1	217.919	364.096	31	19	15	127.669	22	7	14	298.393	42	30	70	47	35	67.23	AT3G10290	Q9FYE5	PF03151	PTHR11132|PTHR11132:SF436
TRINITY_DN10389_c1_g1_i6	7.081	52.904	0	0	0	12.331	0	0	0	2.607	0	0	0	0	0	3.77	AT3G10290	Q9FYE5	PF03151	PTHR11132:SF400|PTHR11132
TRINITY_DN1038_c0_g1_i10	39.927	22.929	85.792	128.019	79.515	34.088	84.177	152.177	68.726	16.641	82.418	45.358	36.134	132.614	30.329	48.304	AT1G73690	P29620	PF00069	PTHR24056:SF470|PTHR24056
TRINITY_DN1038_c0_g1_i12	272	340.965	269	477	381	279	496	389	290.35	256.343	226.243	281.989	319.088	372.832	245.998	292.003	AT1G18040	P29620	PF00069	PTHR24056:SF470|PTHR24056
TRINITY_DN1038_c0_g1_i5	0	0	0	0	0	0	0	0	0	0	0	0	0	9.656	0	0	AT1G18040	P29620	PF00069	PTHR24056|PTHR24056:SF470
TRINITY_DN1038_c0_g1_i6	424.801	647.996	404.255	1073.93	714.755	478.652	592.222	755.692	493.204	490.343	599.417	648.792	593.738	624.572	408.851	390.463	AT1G18040	P29620	PF00069	PTHR24056:SF470|PTHR24056
TRINITY_DN1038_c0_g1_i9	10.675	11.161	54.175	66.301	92.598	64.841	69.693	149.683	16.739	7.391	18.509	22.225	10.601	2.395	23.876	10.336	AT1G18040	P29620	PF00069	PTHR24056|PTHR24056:SF470
TRINITY_DN1038_c0_g2_i1	94.708	114.445	96.778	258.807	169.14	113.42	162.418	189.264	161.98	120.283	219.413	186.636	182.497	227.364	135.945	153.895	AT5G52450
TRINITY_DN103901_c0_g1_i1	0	0	0	0	0	0	0	0	0	0	0	0	0	0	0	0	AT2G33470	Q80W71	PF08718	PTHR10219|PTHR10219:SF25
TRINITY_DN103906_c0_g1_i2	0	0	0	5	0	0	0	0	0	0	0	0	0	1	1	0	AT2G38390	Q9LEH3		PTHR31388:SF176|PTHR31388
TRINITY_DN103924_c0_g1_i1	0	6	4	7	9	0	0	6	0	0	0	0	0	0	0	0	AT3G56060	Q47944	PF05199|PF00732	PTHR11552:SF147|PTHR11552
TRINITY_DN103927_c0_g1_i1	0	0	0	0	0	0	0	1	0	0	1	0	0	0	0	2		Q54UR0	PF00043	PTHR43900|PTHR43900:SF24
TRINITY_DN10393_c0_g1_i1	19.123	0	0	1.887	0	4.973	0	0	4.033	0	0	1.871	0	16.611	4.89	6.539	AT5G14430	Q8VZV7	PF03141	PTHR10108|PTHR10108:SF1103
TRINITY_DN10393_c0_g1_i12	52.945	0	60.149	39.981	74.134	42.44	24.72	11.778	245.468	335.371	152.711	187.742	249.684	365.151	159.912	271.332	AT5G14430	Q8VZV7	PF03141	PTHR10108:SF1103|PTHR10108
TRINITY_DN10393_c0_g1_i13	944.489	1271.77	375.953	544.611	436.869	889.345	532.339	386.04	90.708	251.899	144.289	105.388	110.249	221.672	56.695	98.589	AT5G14430	Q8VZV7	PF03141	PTHR10108:SF1103|PTHR10108
TRINITY_DN10393_c0_g1_i8	45.274	19.467	1.331	10.797	8.997	27.068	8.941	1.182	1.791	3.73	0	0	4.067	12.565	1.503	4.54	AT5G14430	Q8VZV7	PF03141	PTHR10108|PTHR10108:SF1103
TRINITY_DN103944_c0_g1_i1	0	0	0	0	0	0	0	7	0	0	1	0	0	0	1	0
TRINITY_DN10394_c0_g1_i2	29.355	33.91	16.472	13.193	15.8	21.501	15.757	13.422	7.59	8.017	13.785	13.315	8.663	15.769	7.812	7.583	AT5G52070		PF05641	PTHR31917|PTHR31917:SF66
TRINITY_DN10394_c0_g1_i3	222.835	379.09	131.528	310.1	294.2	217.499	229.133	208.566	173.41	164.205	173.215	168.685	301.337	346.231	183.188	250.417	AT5G52070		PF05641	PTHR31917:SF66|PTHR31917
TRINITY_DN103953_c0_g2_i1	0	1.218	0	3	1	0	1	10	0	0	0	0	0	0	0	0		Q2W4T8	PF00015	PTHR32089|PTHR32089:SF92
TRINITY_DN10395_c0_g1_i1	1	1	0	1	0	0	0	0	0	0	1	0	0	0	0	0	AT4G10850	Q8LBF7	PF03083|PF03083	PTHR10791|PTHR10791:SF164
TRINITY_DN10397_c0_g1_i2	7503.6	19521.2	268.043	216.841	154.675	5784.76	32	38.081	15	790.807	126	56	3	7	15	3	AT2G04570	Q9SJB4	PF00657	PTHR45642|PTHR45642:SF32
TRINITY_DN10397_c0_g1_i3	93.535	115.452	9.957	5.159	9.344	47.399	0	0	0	11.193	0	0	0	0	0	0	AT2G04570	Q9SJB4	PF00657	PTHR45642:SF32|PTHR45642
TRINITY_DN103983_c0_g1_i1	0	0	0	0	9.225	0	2	0	0	0	0	0	0	0	0	0			PF00574
TRINITY_DN103983_c0_g3_i1	0	1	0	5	3.775	0	0	0	0	0	0	0	0	0	0	0
TRINITY_DN10398_c0_g1_i1	7.998	32	0	0	1	6.405	0	2	0	2	2	0	0	0	0	0	AT2G39750	O22285	PF03141	PTHR10108:SF1108|PTHR10108
TRINITY_DN10398_c0_g1_i3	2.002	0	0	0	0	1.595	0	0	0	0	0	1	0	0	0	0	AT2G39750	O22285	PF03141	PTHR10108|PTHR10108:SF1108
TRINITY_DN103990_c0_g1_i1	0	0	1	0	0	0	0	3	0	0	0	0	0	0	0	2
TRINITY_DN103995_c0_g1_i3	0	0	2	0	0	0	1	10	0	0	0	0	0	0	3	0	AT2G15230	P34163		PTHR11005|PTHR11005:SF122
TRINITY_DN1039_c0_g1_i1	32.421	55.135	46.642	91.496	29.661	34.213	47.637	57.231	32.249	19.05	41.397	36.458	7.087	60.467	48.349	31.019	AT5G52440	Q9XH75	PF02416	PTHR33162:SF3|PTHR33162
TRINITY_DN1039_c0_g1_i10	1072.65	1559.2	814.609	1943.53	1709.89	1096.94	1599.59	1355.39	592.911	432.32	427.813	424.509	361.815	461.225	341.834	443.182	AT4G09980	Q94AI4	PF05063	PTHR13107|PTHR13107|PTHR13107:SF4|PTHR13107:SF4
TRINITY_DN1039_c0_g1_i12	453.063	616.297	670.762	784.274	823.739	447.483	1028.93	588.118	270.695	348.578	261.619	133.694	249.547	464.375	217.601	323.962	AT4G09980	Q94AI4	PF05063	PTHR13107|PTHR13107|PTHR13107:SF4|PTHR13107:SF4
TRINITY_DN1039_c0_g1_i14	225.952	499.977	653.219	946.174	532.894	232.052	1019.84	983.812	751.441	650.602	1060.46	898.384	1075.77	1198.07	1066.09	1240.7	AT5G52440	Q94G16	PF02416	PTHR33162:SF3|PTHR33162
TRINITY_DN1039_c0_g1_i17	5.067	9.899	4.907	11.723	10.946	0	1.333	8.606	3.619	0	8.144	5.346	0	1.704	1.83	0	AT5G52440	Q9XH75	PF02416	PTHR33162|PTHR33162:SF3
TRINITY_DN1039_c0_g1_i20	0	0	0	0	0	0	0	0	0	0	0	0	13.058	0	0	0	AT5G52440	Q94G16	PF02416	PTHR33162|PTHR33162:SF3
TRINITY_DN1039_c0_g1_i3	171.214	285.733	242.338	514.399	279.743	100.821	392.779	259.374	174.18	100.231	278.012	196.964	252.855	302.223	237.22	228.259	AT5G52440	Q94G16	PF02416	PTHR33162|PTHR33162:SF3
TRINITY_DN1039_c0_g1_i5	21.321	52.657	24.45	46.462	30.502	47.115	52.841	37.618	73.485	8.949	49.489	20.271	43.235	41.949	64.159	23.712	AT5G52440	Q9XH75	PF02416	PTHR33162:SF3|PTHR33162
TRINITY_DN1039_c0_g1_i7	327.541	226.902	115.416	404.491	305.601	247.374	131.526	248.431	41.419	119.27	51.064	71.373	30.633	58.983	49.696	78.163	AT4G09980	Q94AI4		PTHR13107:SF4|PTHR13107:SF4|PTHR13107|PTHR13107
TRINITY_DN103_c0_g1_i11	53.367	42.867	37.52	88.156	29.353	30.391	49.042	42.31	0	0	0	0	0	0	0	0	AT1G59610
TRINITY_DN103_c0_g1_i4	91.677	81.134	76.48	157.837	78.647	75.609	120.235	84.691	13	8	8.012	6.025	3	7	5	1	AT1G59610
TRINITY_DN103_c1_g1_i3	33.054	34.321	0	18.514	69.428	61.872	67.547	29.157	36.783	0	9.878	4.371	13.352	31.967	23.683	0	AT2G26510	Q8GZD4	PF00860	PTHR11119:SF29|PTHR11119
TRINITY_DN103_c1_g1_i4	603.938	373.086	255	599.487	278.572	613.115	297.456	261.843	159.217	130	115.122	153.629	194.648	234.033	128.317	307	AT2G26510	Q8GZD4	PF00860	PTHR11119:SF29|PTHR11119
TRINITY_DN103_c1_g2_i1	22.093	0	0	86.241	128.609	44.073	90.102	23.243	11.952	0	0	0	7.606	13.058	7.394	12.732	AT2G26510	Q8GZD4	PF00860	PTHR11119|PTHR11119:SF29
TRINITY_DN103_c1_g2_i3	63.528	28.464	149.264	287.037	198.065	62.616	356.771	200.963	0	0	0	0	3.795	0	0	0	AT2G26510	Q8GZD4	PF00860|PF00860	PTHR11119:SF29|PTHR11119|PTHR11119:SF29|PTHR11119
TRINITY_DN103_c1_g2_i5	0	0	0	0	0	0	0	0	16.811	2.783	13.924	0	8.954	43.671	10.233	58.567	AT2G26510	Q8GZD4	PF00860|PF00860	PTHR11119|PTHR11119|PTHR11119:SF29|PTHR11119:SF29
TRINITY_DN103_c1_g2_i6	1093.09	479.87	1240.37	2439.29	2049.24	937.018	3397.93	2142.26	676.051	154.217	180.586	303.265	424.893	487.726	430.734	1346.07	AT2G26510	Q8GZD4	PF00860	PTHR11119|PTHR11119:SF29
TRINITY_DN103_c1_g2_i8	131.16	39.673	94.14	259.637	288.401	79.3	266.441	221.118	71.185	0	3.49	37.735	14.753	87.755	55.64	128.631	AT2G26510	Q8GZD4	PF00860|PF00860	PTHR11119:SF29|PTHR11119:SF29|PTHR11119|PTHR11119
TRINITY_DN103_c2_g1_i1	311	419	398	785	642	306.127	653.992	645.115	431	259	429	456	369	423	335.001	349	AT1G68310	Q9C9G6	PF01883	PTHR12377:SF8|PTHR12377
TRINITY_DN10400_c0_g1_i1	123.424	88.63	170.15	363.267	205.731	185.303	134.026	226.516	128.485	47.783	53.506	74.456	24.778	30.577	41.87	35.633	AT3G53470			PTHR36043:SF1|PTHR36043
TRINITY_DN10400_c0_g1_i4	172.576	243.979	344.861	735.733	493.269	431.255	469.402	583.594	723.545	563.018	565.494	628.912	428.222	295.423	338.13	432.367	AT3G53470			PTHR36043:SF1|PTHR36043
TRINITY_DN104016_c0_g1_i1	0	0	0	0	0	0	0	1	0	0	0	0	0	0	0	0
TRINITY_DN10401_c0_g1_i2	86	86	128	281	184	73	246.01	173	117	55	105	92	88	111	97	110	AT5G22730	Q9FNI8	PF08387	PTHR31900
TRINITY_DN10402_c1_g1_i1	0	3	0	0	0	3.932	2	0	0	0	2	0	0	1	0	0	AT5G05330	Q8LDF9		PTHR47658:SF2|PTHR47658
TRINITY_DN10402_c1_g1_i4	3.986	0	3	4	2	0	0	0	0	0	3	0	0	0	0	0	AT5G05330	Q8LDF9		PTHR47658|PTHR47658:SF2
TRINITY_DN10402_c1_g1_i6	11.014	0	0	0	0	8.068	0	2	0	6.012	0	0	2	0	0	0	AT5G05330	Q8LDF9		PTHR47658|PTHR47658:SF2
TRINITY_DN104030_c0_g1_i3	0	0	2	0	0	0	2	1	1	1	8	0	0	0	4	0			PF11899|PF13649	PTHR47473
TRINITY_DN104036_c0_g1_i1	0	0	0	2	2	0	1	0	0	0	0	0	0	0	0	0		Q44470	PF07690	PTHR43791:SF90|PTHR43791
TRINITY_DN104036_c0_g2_i1	5	3	0	0	0	1	0	1	0	0	0	0	0	0	0	0	AT2G29650	Q44470	PF07690	PTHR43791:SF90|PTHR43791
TRINITY_DN10403_c0_g1_i1	26.005	85.575	26.403	59.851	52.614	35.784	31.053	36.355	22.664	10.432	15.033	25.235	13.455	12.963	24.305	16.846	AT5G50110	A8MKR7	PF02527	PTHR31760
TRINITY_DN10403_c0_g1_i2	4.004	4.947	1.592	0	4.707	0	7.728	0	0	0	0	0	0	1.777	0	0	AT5G50110	A8YXD7	PF02527	PTHR31760
TRINITY_DN10403_c0_g1_i3	34.123	70.478	33.006	89.149	36.679	19.216	52.219	60.626	92.336	41.568	84.967	96.765	64.545	38.26	62.695	56.154	AT5G50110	A8MKR7	PF02527	PTHR31760
TRINITY_DN104042_c0_g1_i2	0	0	0	0	0	0	0	0	0	0	0	0	0	0	0	0		Q9URV4	PF06916	PTHR21377|PTHR21377:SF0
TRINITY_DN104045_c0_g1_i3	0	0	0	0	0	0	0	3	0	0	0	0	0	0	1	5.637		G2TRU5	PF08583	PTHR22977:SF5|PTHR22977
TRINITY_DN104045_c0_g1_i5	0	0	1	2	0	0	4	6	2	1	0	0	0	1	0	7.363		Q05027	PF02291	PTHR48068|PTHR48068:SF4
TRINITY_DN104046_c0_g1_i1	0	0	0	0	0	0	0	0	0	0	0	0	0	0	0	0	AT5G66720	B3P5D3		PTHR12320|PTHR12320:SF1
TRINITY_DN10404_c0_g1_i3	543.971	2094.8	170.857	196.773	201	395	170	129	54.38	309.677	96.033	99.286	48	55.746	56.28	48.456	AT5G12250	P45960	PF00091	PTHR11588:SF351|PTHR11588
TRINITY_DN10404_c0_g1_i5	14	11	14.143	28.227	29	15	18	13	51.62	36.351	43.632	61.714	45	51.254	51.72	30.544	AT1G75780	Q6VAF8	PF00091	PTHR11588:SF332|PTHR11588
TRINITY_DN104051_c0_g1_i1	0	0	0	0	0	0	0	0	0	1	0	0	0	1	0	0	AT5G25320	F4JWR0		PTHR31096:SF50|PTHR31096
TRINITY_DN104056_c0_g2_i1	0	0	0	0	0	0	0	0	1	0	0	0	0	0	0	3
TRINITY_DN10405_c0_g1_i1	19.177	36.142	11.586	29.799	28.41	19.151	34.816	22.531	33.442	18.848	47.071	28.733	42.467	51.711	32.645	27.857	AT1G50170	Q84JH7		PTHR33542|PTHR33542:SF3
TRINITY_DN10405_c0_g1_i10	10.015	11.637	7.878	6.283	1.062	14.891	5.126	7.124	3.227	0	1.163	1.297	4.312	4.383	0	4.444	AT1G50170	Q84JH7		PTHR33542|PTHR33542:SF3
TRINITY_DN10405_c0_g1_i13	38.644	60.144	28.25	49.198	87.802	53.793	81.182	62.097	12.929	1.651	4.169	4.135	6.451	7.86	9.932	8.103	AT1G50170	Q84JH7	PF01903	PTHR33542|PTHR33542:SF3
TRINITY_DN10405_c0_g1_i17	5.445	4.517	1.923	3.3	0	0	0	7.565	19.176	0	2.109	23.517	0	7.779	3.115	4.818	AT1G50170	Q84JH7	PF01903	PTHR33542|PTHR33542:SF3
TRINITY_DN10405_c0_g1_i3	0	10.131	2.082	7.126	0	1.218	0	0	1.698	0	0	0	0	0	0	0	AT1G50170	Q84JH7		PTHR33542|PTHR33542:SF3
TRINITY_DN10405_c0_g1_i5	79.528	123.141	64.653	92.153	50.727	67.15	101.258	42.513	27.385	29.487	27.738	22.058	99.512	78.244	17.423	46.478	AT1G50170	Q84JH7	PF01903	PTHR33542|PTHR33542:SF3
TRINITY_DN10405_c0_g1_i8	5.555	22.288	9.628	1.142	0	11.786	6.617	1.17	16.142	27	15.749	22.26	10.259	6.023	9.885	21.3	AT1G50170	Q84JH7	PF01903	PTHR33542:SF3|PTHR33542
TRINITY_DN104070_c0_g1_i1	0	0	0	0	0	0	0	0	0	0	0	0	0	0	0	0	AT5G58140	O42626	PF00069	PTHR45637:SF22|PTHR45637:SF22|PTHR45637|PTHR45637
TRINITY_DN104085_c0_g1_i2	0	0	0	0	0	0	1	2	0	0	1	0	0	0	0	2	AT5G60540	Q8LAD0	PF01174|PF01174	PTHR31559:SF0|PTHR31559
TRINITY_DN104093_c0_g1_i1	0	0	4	1	0	0	0	17	1	0	0	0	0	0	0	2	AT2G21890	Q04894	PF00107	PTHR42683:SF47|PTHR42683
TRINITY_DN10409_c0_g1_i1	46.764	36.52	46.336	93.395	102.576	96.19	143.294	63.221	68.83	52.179	36.232	46.654	38.564	61.315	39.624	113.991	AT4G37790	P46604		PTHR45714|PTHR45714:SF14
TRINITY_DN10409_c0_g1_i2	574.019	424.021	278.457	478.324	383.779	509.465	759.57	413.395	286.986	297.535	143.315	151.356	112.982	145.555	167.939	435.384	AT4G37790	P46604	PF00046|PF02183	PTHR45714|PTHR45714:SF14
TRINITY_DN10409_c0_g1_i5	34.677	23.546	15.724	21.27	13.643	14.716	41.544	13.419	4.072	15.16	15.811	10.591	1.667	16.794	16.45	44.389	AT2G22800	P46603		PTHR45714:SF46|PTHR45714
TRINITY_DN10409_c0_g1_i6	1377.07	1050.4	1242.49	1933.05	1768.1	2026.55	3469.74	1429.68	1669.11	2064.66	662.65	654.399	1133.79	1945.63	876.987	1965.24	AT4G37790	P46604	PF00046|PF02183	PTHR45714|PTHR45714:SF14
TRINITY_DN1040_c0_g1_i11	11.461	50.053	48.925	85.225	174.581	69.902	121.694	46.903	29.54	0	7.238	98.079	0	62.241	6.314	43.27	AT5G15540	A5HEI1	PF12765	PTHR21704:SF18|PTHR21704
TRINITY_DN1040_c0_g1_i4	7.434	2.527	9.077	4.574	24.071	6.753	17.097	11.983	4.189	1.469	1.278	9.886	4.406	4.422	0	4.325	AT5G15540	A5HEI1	PF12765	PTHR21704|PTHR21704:SF18
TRINITY_DN1040_c0_g1_i5	1494.82	1327.1	1488.19	2923.54	2239.31	1340.17	2288.4	2398.3	1254.35	836.743	1069.61	1049.24	661.167	1148.4	865.765	1055.92	AT5G15540	A5HEI1	PF12765|PF12830	PTHR21704|PTHR21704:SF18
TRINITY_DN1040_c0_g1_i9	28.815	28.508	19.383	93.941	56.878	10.124	48.201	50.388	0	12.788	41.081	10.795	29.428	23.938	13.98	45.487	AT5G15540	A5HEI1
TRINITY_DN1040_c0_g2_i1	1004.74	1159.37	58	99	56	727.036	26	69	62	106	40	52	30	26.522	19	38	AT5G15530	Q9LLC1	PF00364	PTHR43416:SF25|PTHR43416
TRINITY_DN1040_c0_g2_i2	32.675	12.094	0	0	0	7.607	0	0	0	0	0	0	0	2.478	0	0	AT5G15530	Q9LLC1	PF00364	PTHR43416:SF25|PTHR43416
TRINITY_DN104103_c0_g1_i1	3	10	2	1	0	5	3	2	1	6	1	0	2.001	0	2	0			PF10536
TRINITY_DN104103_c0_g2_i1	0	12.757	17.679	0	0	1	0	2	0	0	0	0	0	0	0	0	AT1G51538		PF10536	PTHR46033:SF9|PTHR46033
TRINITY_DN104103_c0_g2_i7	1	20.243	10.2	4	0	1	1	0	0	0	0	0	0	0	1	0
TRINITY_DN10410_c0_g1_i1	43.002	67.995	40.006	63.46	20.072	33.517	29.729	39.193	54.126	40.012	37.877	19.679	16.384	59.498	36.704	31.95	AT5G62600	P04146		PTHR45895
TRINITY_DN10410_c0_g1_i10	11.44	67.668	28.507	44.965	29.59	22.994	35.105	30.552	46.147	13.464	39.051	15.98	9.009	31.464	12.392	24.671	AT5G62600	Q8GUL2	PF08389	PTHR12363:SF49|PTHR12363
TRINITY_DN10410_c0_g1_i19	28.43	16.359	0	4.722	0	10.767	10.81	29.534	0	7.493	0	0	0	13.53	0	0	AT5G62600			PTHR34222|PTHR34222:SF31
TRINITY_DN10410_c0_g1_i24	111.742	395.029	88.487	195.358	140.116	64.444	157.536	138.736	69.668	45.153	72.955	53.593	31.1	107.768	51.296	30.365	AT5G62600		PF14223	PTHR35317|PTHR35317:SF11
TRINITY_DN10410_c0_g1_i27	5.387	8.827	0	30.691	13.219	32.952	12.498	0	20.622	0	0	0	0	11.94	0	0	AT5G62600			PTHR34222:SF31|PTHR34222
TRINITY_DN104132_c0_g1_i2	0	0	0	0	0	0	0	0	0	0	0	0	0	0	0	0		O59745	PF02157	PTHR15071:SF31|PTHR15071
TRINITY_DN10413_c0_g1_i1	152.365	158.289	175.208	295.429	295.259	94.736	557.948	318.103	243.501	93.939	200.396	271.608	224.576	388.47	251.659	309.004	AT3G03620	F4J158	PF01554|PF01554	PTHR11206|PTHR11206:SF402
TRINITY_DN10413_c0_g1_i11	457.195	764.156	351.789	637.623	308.136	326.915	566.491	380.276	571.225	390.562	348.765	450.41	403.57	800.943	304.636	507.929	AT3G03620	F4J158	PF01554|PF01554	PTHR11206|PTHR11206:SF402
TRINITY_DN10413_c0_g1_i3	19.44	25.282	8.033	21.948	12.607	0	7.696	23.621	15.321	15.499	24.839	23.981	28.853	30.587	22.705	5.067	AT3G03620	F4J158	PF01554|PF01554	PTHR11206|PTHR11206:SF384
TRINITY_DN104141_c0_g1_i1	0	0	0	0	0	0	0	0	0	0	0	0	0	0	0	0		P40406	PF00933	PTHR30480
TRINITY_DN10414_c0_g1_i1	279.91	444.555	9.546	9.547	7.488	188.274	11.597	11.297	9.447	92.296	6.215	3.473	6.328	3	0	8.9	AT5G06610		PF04788	PTHR31300|PTHR31300:SF3
TRINITY_DN10414_c0_g1_i2	181.09	215.445	15.454	15.453	12.512	117.892	3.403	20.703	1.553	74.696	2.785	3.527	1.672	0	0	10.1	AT5G06610		PF04788	PTHR31300:SF3|PTHR31300
TRINITY_DN104150_c0_g1_i1	0	0	0	0	0	0	0	0	0	0	0	0	0	0	0	0
TRINITY_DN104153_c0_g1_i1	0	0	0	0	0	0	0	0	0	0	0	0	0	0	0	0
TRINITY_DN10415_c0_g2_i1	4.13	13.501	5.668	9.699	6.628	3.92	6.616	6.536	4.083	4.065	2.58	5.346	2.694	6.888	6.516	5.567	AT2G01140	Q9ZU52	PF00274	PTHR11627:SF62|PTHR11627
TRINITY_DN10415_c0_g2_i3	602.999	726.021	580.642	1119.73	1094.5	661.378	1097.32	854.22	744.548	441.231	554.212	750.921	799.998	739.762	681.844	885.538	AT2G01140	Q9ZU52	PF00274	PTHR11627|PTHR11627:SF62
TRINITY_DN10415_c0_g2_i4	3084.2	7463.36	1211.37	1663.19	1181.91	2674.09	2594.66	1131.38	1144.37	1180.7	748.992	688.733	808.308	1081.35	799.64	1716.89	AT2G01140	Q9ZU52	PF00274	PTHR11627:SF62|PTHR11627
TRINITY_DN104164_c0_g1_i2	0	0	1	1	0	0	3	9	0	0	0	0	0	0	1	1	AT3G03490	Q9SRQ3	PF04614	PTHR12774|PTHR12774:SF2
TRINITY_DN104187_c0_g2_i1	1	2	0	0	0	0	1	0	0	0	0	0	0	0	0	0
TRINITY_DN10418_c0_g1_i1	4	89	5	4	8	2	2	5	3	0	0	1	0	0	0	1	AT2G40550	Q501D5	PF09739	PTHR13489
TRINITY_DN10419_c0_g1_i1	0	27.355	1.994	25.269	26.044	0	0	0	69.216	76.264	68.699	41.996	71.466	74.509	38.901	40.662	AT1G63940	P92947	PF07992	PTHR43557|PTHR43557:SF6
TRINITY_DN10419_c0_g1_i3	0	18.941	2.014	20.183	22.002	4.787	8.955	3.805	8.272	2.032	5.036	2.077	0	13.943	13.433	4.926	AT1G63940	P92947	PF07992	PTHR43557|PTHR43557:SF6
TRINITY_DN10419_c0_g1_i6	1.289	6.901	0	0	2.72	9.224	0	0	3.803	0	0	0	0	1.732	0	0	AT1G63940	P92947	PF07992	PTHR43557:SF6|PTHR43557
TRINITY_DN10419_c0_g1_i7	214.711	437.803	160.992	263.547	150.233	123.989	221.045	224.195	224.709	190.703	224.265	208.927	195.534	194.816	146.666	150.412	AT1G63940	P92947	PF07992	PTHR43557:SF6|PTHR43557
TRINITY_DN1041_c0_g1_i1	137.798	122.695	217.718	409.957	463.353	131.574	358.518	249.121	216.058	92.441	176.566	101.628	576.314	559.196	131.663	347.259	AT2G35800	Q4V9P0	PF00153|PF00153|PF00153	PTHR45667:SF25|PTHR45667
TRINITY_DN1041_c0_g1_i2	902.574	720.349	2201.61	3550.45	2774.59	1600.15	2276.56	3385.91	2098.72	1670.54	1584.51	1736.75	969.252	1107.56	692.074	880.241	AT2G35800	Q4V9P0	PF00153|PF00153|PF00153	PTHR45667|PTHR45667:SF25
TRINITY_DN1041_c0_g1_i3	0	0	0	0	0	0	0	0	0	0	0	0	61.408	0	0	0	AT2G35800	Q4V9P0	PF00153|PF00153|PF00153	PTHR45667|PTHR45667:SF25
TRINITY_DN1041_c0_g1_i4	21.153	10.862	40.455	184.444	121.407	2.976	63.691	65.811	32.157	3.016	17.928	12.394	17.083	84.964	0	22.766	AT2G35800	Q6NUK1		PTHR45667:SF25|PTHR45667
TRINITY_DN1041_c0_g1_i6	74.039	170.443	41.827	154.576	216.69	30.45	83.807	136.068	84.371	0	0	10.228	181.943	206.343	11.47	23.735	AT2G35800	O18757		PTHR45667:SF25|PTHR45667
TRINITY_DN104202_c0_g1_i3	1	3	2	2	7	0	1	0	0	0	0	0	0	0	0	0	AT3G55850	P21628	PF02653	PTHR30482|PTHR30482:SF5
TRINITY_DN104206_c0_g1_i1	0	0	0	0	0	0	0	4	0	0	0	0	0	0	1	0
TRINITY_DN10421_c0_g1_i1	366.208	2633.45	1	2	7	286	1	2	0	15	0	0	0	0	1	2	AT5G48490	Q8W453	PF14368	PTHR33122:SF63|PTHR33122
TRINITY_DN104222_c0_g1_i1	0	0	0	0	0	0	0	1	0	0	0	0	0	0	0	3
TRINITY_DN104224_c0_g1_i1	0	0	7	4	5	0	2	16	0	0	1	0	0	0	0	0
TRINITY_DN104231_c0_g2_i1	1	0	0	1	0	0	2	4	0	0	0	0	0	0	0	0		Q2W8M7	PF00015	PTHR32089|PTHR32089:SF92
TRINITY_DN104235_c0_g1_i1	0	0	0	0	0	0	0	0	0	1	0	0	0	0	0	0		Q9C196	PF00027	PTHR11635:SF162|PTHR11635
TRINITY_DN104236_c0_g1_i1	0	0	3	5	0	0	4	11	0	0	0	0	0	0	0	0
TRINITY_DN10423_c0_g1_i1	86.548	137.48	67.228	164.206	114.512	74.556	112.035	112.865	83.469	120.576	72.13	68.338	98.26	89.938	54.89	67.271	AT3G56430			PTHR36354:SF2|PTHR36354
TRINITY_DN10423_c0_g1_i2	10.818	15.747	4.14	7.273	23.017	7.933	11.406	11.346	7.784	1.504	6.636	1.532	0	1.544	2.338	6.771	AT2G40800			PTHR36354:SF2|PTHR36354
TRINITY_DN10423_c0_g1_i3	0	0	0	3.43	0	4.376	0	0	2.066	0	2.677	0	0	1.918	5.622	0	AT2G40800			PTHR36354|PTHR36354:SF2
TRINITY_DN10423_c0_g1_i5	354.73	664.772	329.632	518.09	423.471	311.135	509.539	415.792	363.682	326.921	261.558	252.13	411.762	343.601	271.151	371.958	AT3G56430			PTHR36354|PTHR36354:SF2
TRINITY_DN104243_c0_g1_i2	0	0	0	0	0	0	0	0	0	0	0	0	0	0	0	0		P33775	PF02815|PF16192	PTHR10050|PTHR10050:SF50
TRINITY_DN104243_c0_g1_i3	0	0	12	2	0	0	0	6	0	0	0	0	0	0	0	0		P33775	PF16192|PF02815	PTHR10050|PTHR10050:SF50
TRINITY_DN104248_c0_g1_i1	0	0	0	0	3	0	1	1	2	0	0	2	0	1	0	0
TRINITY_DN10424_c0_g1_i10	72.169	120.252	42.383	118.797	74.762	92.796	124.98	108.551	60.387	21.304	50.087	59.665	60.851	76.946	50.203	53.526	AT3G22260	Q0V869		PTHR12419|PTHR12419:SF69
TRINITY_DN10424_c0_g1_i15	95.067	163.259	80.237	179.519	110.096	81.877	151.833	81.222	91.321	52.515	92.27	110.773	101.176	128.172	117.863	92.561	AT3G22260	Q0V869	PF02338	PTHR12419|PTHR12419:SF69
TRINITY_DN10424_c0_g1_i17	6.405	2.334	3.109	3.502	2.341	3.652	4.301	3.194	2.633	0	1.123	2.718	3.434	4.072	1.14	0
TRINITY_DN10424_c0_g1_i7	106.356	140.155	92.979	181.104	101.009	86.991	167.886	136.198	84.726	37.297	76.962	85.502	101.539	91.567	71.973	92.351	AT3G22260	Q0V869		PTHR12419|PTHR12419:SF69
TRINITY_DN10424_c0_g1_i9	0	0	3.291	0	5.792	0	0	1.136	2.933	3.884	1.557	4.342	0	6.243	4.822	1.562	AT3G22260	Q0V869		PTHR12419:SF69|PTHR12419
TRINITY_DN10425_c0_g1_i1	1166.32	343	2623.48	5503.92	2693.97	1295.57	4094.68	4385.31	3740	2024.79	1879.92	2386	1162.67	1374	841	991	AT3G54850	Q8VZ40	PF00514|PF00514|PF04564	PTHR23315|PTHR23315:SF111
TRINITY_DN104268_c1_g1_i2	0	0	0	0	0	0	0	2	0	0	0	0	0	0	0	2	AT1G19120	P87173	PF01423	PTHR15588|PTHR15588:SF8
TRINITY_DN104268_c1_g1_i3	0	0	0	0	0	0	0	5	0	0	0	0	0	0	0	0	AT1G19120	P87173	PF01423	PTHR15588:SF8|PTHR15588
TRINITY_DN104268_c2_g1_i1	0	0	0	0	0	0	0	0	0	0	0	0	0	0	0	0	AT1G19120	P87173	PF01423	PTHR15588:SF8|PTHR15588
TRINITY_DN104268_c2_g2_i1	0	0	4	4	0	0	2	4	0	0	0	1	0	0	0	2	AT1G19120	P87173	PF01423	PTHR15588:SF8|PTHR15588
TRINITY_DN10427_c0_g1_i3	13.193	11.432	15.328	4.318	7.978	0	32.652	0	3.856	3.27	9.563	0	0	0	4.231	0	AT3G59300			PTHR13343|PTHR13343:SF18
TRINITY_DN10427_c0_g1_i5	357.951	528.594	290.672	546.682	557.027	353	541.269	547.855	311.246	270.721	314.437	327	454	376	297.769	419	AT3G59300	Q0WMN5		PTHR13343|PTHR13343:SF18
TRINITY_DN10428_c0_g1_i1	523.277	652.853	501.373	975.452	976.866	689.075	1224.13	907.643	572.359	490.441	472	339.729	781.463	562.648	896.229	1461.55	AT1G04400	Q96524	PF00875|PF03441	PTHR11455|PTHR11455:SF54
TRINITY_DN10428_c0_g1_i2	0	0	0	0	0	0	3.856	3.091	0	0	0	0	0	0	0	0	AT1G04400	Q96524	PF03441|PF00875	PTHR11455|PTHR11455:SF54
TRINITY_DN10428_c0_g1_i3	22.232	14.842	30.716	47.591	34.134	4.428	35.276	41.291	18.968	12.559	0	12.271	9.537	24.409	21.814	34.042	AT1G04400	Q96524	PF00875|PF03441	PTHR11455|PTHR11455:SF54
TRINITY_DN10428_c0_g1_i4	0	0	0	0	0	0	1.934	0	3.676	0	0	0	0	0	0	0	AT1G04400	Q96524	PF03441|PF00875	PTHR11455:SF54|PTHR11455
TRINITY_DN10428_c0_g1_i6	1.524	0	0	0	0	1.497	0	0	0	0	0	0	0	0	0	1.412	AT1G04400	Q96524	PF00875|PF03441	PTHR11455:SF54|PTHR11455
TRINITY_DN10428_c0_g1_i7	0	0	0	0	0	0	0	0	0	0	0	0	0	0	0	0	AT1G04400	Q96524	PF00875|PF03441	PTHR11455|PTHR11455:SF54
TRINITY_DN1042_c0_g1_i1	0	0	0	0	0	0	0	0	0	0	0	0	0	0	0	0	AT5G51230	Q8L6Y4		PTHR22597|PTHR22597:SF22
TRINITY_DN1042_c0_g1_i10	91.971	95.06	69.916	118.115	100.318	81.073	81.441	120.46	53.61	9.943	39.167	47.008	25.019	81.558	24.222	24.09	AT5G51230	Q8L6Y4		PTHR22597:SF21|PTHR22597
TRINITY_DN1042_c0_g1_i11	366.834	576.384	280.717	470.263	463.077	321.446	494.996	498.305	261.939	195.503	234.705	174.552	216.592	295.091	172.537	256.917	AT5G51230	Q69KN0	PF09733	PTHR22597:SF22|PTHR22597
TRINITY_DN1042_c0_g1_i13	70.892	169.115	54.33	78.964	102.595	60.404	67.616	60.496	84.444	33.32	39.512	20.423	18.277	95.499	46.358	47.658	AT5G51230	Q69KN0	PF09733	PTHR22597|PTHR22597:SF22
TRINITY_DN1042_c0_g1_i7	766.746	940.155	605.629	1188.66	950.307	748.637	819.349	936.356	418.008	351.234	393.616	292.048	126.112	345.851	282.883	298.336	AT5G51230	Q8L6Y4	PF09733	PTHR22597:SF22|PTHR22597
TRINITY_DN1042_c1_g1_i1	84.979	93.614	56.99	100.661	97.801	58.158	98.82	85.646	1	0	0	0	0	0	0	0	AT4G02560	Q38796		PTHR33400:SF6|PTHR33400
TRINITY_DN1042_c1_g1_i16	67.461	31.322	42.534	81.525	71.326	32.145	64.971	65.53	24.456	8.232	28.422	26.924	7.802	14.322	11.612	12.592	AT4G02560	Q38796		PTHR33400|PTHR33400:SF6
TRINITY_DN1042_c1_g1_i18	634.746	1045.84	626.742	1222.09	944.874	769.865	980.213	751.089	610.272	406.892	419.697	414.477	312.198	550.503	357.388	440.408	AT4G02560	Q38796		PTHR33400:SF6|PTHR33400
TRINITY_DN1042_c1_g1_i4	0	0	0	0	0	19.833	0	3.155	12.272	11.876	10.881	3.6	0	7.174	0	0	AT4G02560	Q38796		PTHR33400:SF6|PTHR33400:SF6|PTHR33400|PTHR33400
TRINITY_DN10430_c0_g1_i2	70	153	49	73	51	76	76	76	51	73.034	50	28	37	64	22	37	AT1G09820	O04504	PF13041|PF13041|PF13041|PF13041|PF13041|PF01535|PF12854	PTHR47932:SF2|PTHR47932
TRINITY_DN104313_c0_g2_i2	0	0	0	0	0	0	0	0	0	0	0	0	0	0	0	0	AT2G42270	Q9UT24	PF02889	PTHR24075|PTHR24075:SF13
TRINITY_DN10431_c0_g1_i1	7	0	13	31.489	36.126	7.076	0	28.567	0	0	0	0	0	0	0	0	AT4G33280	Q8RYD1	PF02362	PTHR31391:SF106|PTHR31391
TRINITY_DN10431_c0_g1_i12	0	6	0	8.511	10.874	9.925	0	26.433	1	2	0	0	1	0	0	3	AT4G33280	Q8RYD1	PF02362	PTHR31391|PTHR31391|PTHR31391:SF83|PTHR31391:SF83
TRINITY_DN10431_c0_g1_i6	0	0	0	0	0	0	20	0	0	0	1	0	0	0	0	0	AT4G33280	Q8RYD1	PF02362	PTHR31391:SF106|PTHR31391
TRINITY_DN10433_c0_g1_i1	17.667	255.408	11.497	24.238	0	32.884	2.367	0	4.334	31.968	0	0	11.01	27.788	9.512	14.117	AT3G06660		PF04795|PF04438	PTHR21561|PTHR21561:SF16
TRINITY_DN10433_c0_g1_i11	0	41.799	7.226	0	22.087	0	0	5.788	0	0	0	0	0	2.416	0	0	AT3G06660			PTHR21561|PTHR21561:SF16
TRINITY_DN10433_c0_g1_i2	5.411	18.724	0	27.762	0	25.349	0	0	3.666	0	3.549	0	13.284	0	0	0	AT3G06660			PTHR21561:SF16|PTHR21561
TRINITY_DN10433_c0_g1_i4	0	0	0	0	0	0	0	0	0	6.032	10.335	10.868	5.541	2.796	0	0	AT3G06660		PF04438|PF04795	PTHR21561|PTHR21561:SF16
TRINITY_DN10433_c0_g1_i6	3.706	124.03	3.511	0	18.568	11.713	0	0	3.597	0	0	0	0	0	0	0	AT3G06660		PF04795|PF04438	PTHR21561|PTHR21561:SF16
TRINITY_DN10433_c0_g1_i9	45.143	69.039	21.766	0	20.345	0	9.633	29.212	13.403	0	12.116	17.132	12.165	0	15.488	8.883	AT3G06660			PTHR21561:SF16|PTHR21561
TRINITY_DN104342_c0_g1_i2	0	0	0	0	0	0	3	5	1	1	0	0	0	0	1	3	AT3G08720	Q99014	PF00069|PF00433	PTHR24356:SF210|PTHR24356
TRINITY_DN10437_c0_g2_i3	35.878	59.146	19.204	32.509	38.506	34.216	5.18	100.338	1	10	2	0	2	0	1	2	AT2G33205	A7S4N4	PF03348	PTHR10383:SF23|PTHR10383
TRINITY_DN10437_c0_g2_i4	5.122	17.854	6.796	8.491	63.494	12.784	8.82	67.662	0	0	0	0	0	0	0	0	AT2G33205	A7S4N4	PF03348	PTHR10383:SF23|PTHR10383
TRINITY_DN104388_c0_g2_i1	0	0	5	3	5	1	4	1	0	0	0	0	0	0	0	0		P00438	PF01494	PTHR43004:SF3|PTHR43004
TRINITY_DN104393_c0_g1_i1	0	0	0	0	0	0	0	0	0	0	0	0	0	0	0	0		B8N0F1	PF07690	PTHR11360:SF224|PTHR11360
TRINITY_DN10439_c0_g1_i1	0	0	0	6.942	6.276	0	2.744	6.223	3	0	0	0	0	0	0	4	AT5G11130	Q9LFP3	PF03016	PTHR11062:SF264|PTHR11062
TRINITY_DN10439_c0_g1_i2	7	0	5	16.058	8.724	15	20.256	5.777	0	0	1	3	0	1	2	0	AT5G20260	Q3E9A4	PF03016	PTHR11062|PTHR11062:SF267
TRINITY_DN104401_c1_g1_i2	0	0	0	0	0	0	11	2	2	1	0	0	0	0	2	1		O14359	PF01738	PTHR47668
TRINITY_DN10440_c0_g1_i1	512.793	633.309	437.692	794.524	392.686	319.217	724.956	520.275	346.485	108.48	445.829	465.064	145.242	248.79	505.366	247.668	AT1G80000	Q93ZJ9	PF09405	PTHR46837|PTHR46837:SF5
TRINITY_DN10440_c0_g1_i10	421.087	568.503	307.09	840.124	429.361	319.466	567.87	409.44	115.937	145.405	247.728	194.024	195.341	282.149	279.832	255.327	AT1G80000	Q93ZJ9	PF09405	PTHR46837:SF5|PTHR46837
TRINITY_DN10440_c0_g1_i12	843.478	1169.67	826.455	1211.12	1049.8	885.727	1241.51	916.203	620.21	597.481	498.507	515.905	489.892	645.802	376.843	598.814	AT1G80000	Q93ZJ9	PF09405	PTHR46837|PTHR46837:SF5
TRINITY_DN10440_c0_g1_i13	303.755	468.263	179.762	377.344	306.162	276.424	365.273	226.983	146.367	153.83	171.936	124.006	114.195	194.26	210.309	130.191	AT1G80000	Q93ZJ9	PF09405	PTHR46837:SF5|PTHR46837
TRINITY_DN104411_c0_g1_i1	0	0	1	1	0	0	0	7.368	0	0	0	0	0	0	0	0	AT2G06530	P36108	PF03357	PTHR10476:SF4|PTHR10476
TRINITY_DN104411_c0_g1_i2	0	0	0	0	0	0	1	3.632	0	0	0	0	0	0	0	0	AT2G06530	P36108	PF03357	PTHR10476:SF4|PTHR10476
TRINITY_DN104418_c0_g1_i1	0	0	0	0	0	0	0	4	0	0	0	0	0	0	0	0
TRINITY_DN104428_c0_g1_i1	0	0	0	0	0	0	0	0	0	0	0	0	0	0	3	3	AT1G71790	Q5XI32	PF01115	PTHR10619
TRINITY_DN104435_c0_g1_i4	0	0	3	2	2	0	1	7	0	0	0	0	0	0	0	0
TRINITY_DN104436_c0_g1_i1	0	0	0	0	0	0	2	9	0	0	2	0	0	0	2	4
TRINITY_DN10444_c0_g1_i1	0	34	0	0	27	28.169	1.857	4.279	0	0	0	0	7.365	13	0	0	AT1G25530	Q9C6M2	PF01490	PTHR48017:SF16|PTHR48017
TRINITY_DN10444_c0_g1_i2	19	0	25	25	0	31.831	13.143	78.721	9	23	16	7	8.635	0	5	7	AT1G25530	Q9C6M2	PF01490	PTHR48017|PTHR48017:SF16
TRINITY_DN10444_c0_g2_i1	77	31.365	58	40.085	20	194.164	21	36	37	67	29	23	16	6.666	17	50	AT1G25530	Q9C6M2	PF01490	PTHR48017:SF16|PTHR48017
TRINITY_DN10444_c0_g2_i2	0	11.635	0	10.915	0	66.836	0	0	0	0	0	0	0	1.334	0	0	AT1G25530	Q9C6M2	PF01490	PTHR48017|PTHR48017:SF16
TRINITY_DN104450_c0_g1_i1	0	0	0	0	0	0	0	0	0	0	0	0	0	0	0.5	0
TRINITY_DN104450_c0_g1_i5	0	0	0	0	0	0	0	0	0	3	0	0	0	0	0.5	0
TRINITY_DN104451_c0_g1_i2	0	0	0	0	0	0	0	0	0	0	0	0	0	0	0	0		P24919	PF04716	PTHR12653:SF0|PTHR12653
TRINITY_DN10445_c0_g1_i2	191.77	505.641	175.415	259.561	276.449	148.136	373.145	158.225	203.495	223	145.16	138.593	189	174.229	124.861	238.054	AT3G13682	Q9LID0	PF04433|PF01593	PTHR10742:SF373|PTHR10742
TRINITY_DN10445_c0_g1_i3	49.16	78.577	3.585	50.439	55.551	19.864	26.855	91.776	6.505	0	7.956	24.407	0	7.771	14.139	6.946	AT3G13682	Q9LID0	PF01593|PF04433	PTHR10742|PTHR10742:SF373
TRINITY_DN104467_c0_g1_i1	0	1	0	0	0	0	0	0	0	0	0	0	0	0	0	0		Q06810	PF09463
TRINITY_DN10446_c0_g1_i2	0	1661.97	0	0	3	9	0	0	0	2	0	0	7	0	0	0	AT1G67090	P24007	PF00101|PF12338	PTHR31262:SF10|PTHR31262
TRINITY_DN10446_c1_g1_i3	88570.1	210442	189527	280731	273555	273295	193177	379524	116490	252420	149173	116231	96810.3	86251.7	97601.8	67221.4	AT1G67090	P24007	PF00101|PF12338	PTHR31262:SF10|PTHR31262
TRINITY_DN10446_c1_g1_i5	918.25	798.11	2398.99	3345.49	3765.08	2002.48	1149.3	2019.75	9722.19	8206.45	10357.2	2965.87	4331.34	4111.57	6496.65	9940.96	AT5G38410
TRINITY_DN10446_c1_g1_i6	0	6.261	41.227	14.467	6.484	94.23	0	20.87	82.246	81.921	0	1925.08	1289.17	0	0	7538.5	AT1G67090	P31333	PF00101|PF12338	PTHR31262:SF10|PTHR31262
TRINITY_DN10446_c1_g1_i7	9631.53	10543.5	10509	26316	40318.3	28258.7	6147.27	15617	372.367	736.537	197.27	178.888	192.144	166.847	227.181	78.39	AT1G67090	P31333	PF12338|PF00101	PTHR31262|PTHR31262:SF10
TRINITY_DN10446_c1_g1_i8	791.246	8609.7	965.764	1092.76	424.693	772.992	25.675	217.669	37.391	573.607	144.738	192.691	385.895	158.025	36.284	27.504	AT1G67090	P24007	PF12338|PF00101	PTHR31262|PTHR31262:SF10
TRINITY_DN104472_c0_g1_i1	1	6	0	0	2	1	1	0	0	0	0	0	0	0	0	0		P19920	PF00941|PF03450	PTHR42659
TRINITY_DN10447_c0_g1_i13	76.92	147.665	61.093	113.791	95.613	59.035	44.183	47.179	0	52.328	40.814	28.392	72.546	26.083	63.243	14.169	AT5G24060	Q0WMN5		PTHR13343|PTHR13343:SF28
TRINITY_DN10447_c0_g1_i17	56.65	90.161	0	105.108	86.365	33.892	55.095	57.78	89.306	16.281	32.125	40.636	22.387	106.634	28.955	51.765	AT5G24060	Q0WMN5		PTHR13343:SF28|PTHR13343
TRINITY_DN10447_c0_g1_i4	50.718	53.772	11.342	49.333	31.291	6.924	22.493	25.677	14.085	16.021	19.639	25.293	7.741	36.544	18.34	8.691	AT5G24060	Q0WMN5		PTHR13343|PTHR13343:SF28
TRINITY_DN10447_c0_g3_i9	397.094	870.567	365.334	641.767	377.691	399.504	451.044	498.109	317.609	334.425	460.881	316.679	390.326	475.739	433.462	331.376	AT5G24060	Q0WMN5		PTHR13343|PTHR13343:SF28
TRINITY_DN104486_c0_g1_i1	0	1	0	1	0	4	0	2	3	4	9	3	8	10	4	1	AT5G60440	Q9FKK2	PF00319	PTHR11945:SF677|PTHR11945
TRINITY_DN104488_c0_g1_i1	0	0	0	1	0	0	0	23	0	0	0	0	0	0	0	0				PTHR35318|PTHR35318:SF12
TRINITY_DN104494_c0_g1_i1	0	0	0	0	3	1	1	5	0	0	0	0	0	0	0	0
TRINITY_DN104494_c0_g2_i1	0	3	0	0	5	0	0	0	0	0	0	0	0	0	0	0		P0C5S2	PF01381
TRINITY_DN10449_c0_g1_i3	19	14	9	23	32	13	18	18	2	4	4	1	4	8	5	7
TRINITY_DN10449_c0_g2_i1	16	18	4	10	5	9	3	0	0	0	0	0	0	0	0	0
TRINITY_DN1044_c0_g1_i10	1138.94	1003.2	674.859	1136.98	974.221	951.655	1230.45	730.61	0	0	69.373	18.619	26.006	88.092	7.102	0	AT2G45910	Q8GUH1	PF04564|PF00069	PTHR45647|PTHR45647:SF100
TRINITY_DN1044_c0_g1_i2	338.862	130.579	120.972	221.519	215.993	262.016	297.228	144.456	80.389	112.404	37.586	79.007	46.375	134.232	39.423	69.017	AT2G45910	Q8GUH1	PF04564|PF00069	PTHR45647|PTHR45647:SF100
TRINITY_DN1044_c0_g1_i4	0	0	0	0	0	0	0	0	36.209	8.684	30.82	46.752	32.366	32.031	67.832	76.259	AT2G45910	Q8GUH1	PF04564|PF00069	PTHR45647|PTHR45647:SF100
TRINITY_DN1044_c0_g1_i5	1358.7	1286.34	925.764	1526.14	1495.44	1421.62	1694.75	1405.59	750.33	899.399	766.851	898.621	559.905	830.32	828.804	906.171	AT2G45910	Q8GUH1	PF00069|PF04564	PTHR45647|PTHR45647:SF100
TRINITY_DN1044_c0_g1_i6	73.738	9.198	0	3.738	4.908	45.221	22.718	6.73	5.172	0	0	1.984	0	1.523	4.051	0	AT2G45910	Q8GUH1		PTHR45647:SF72|PTHR45647:SF72|PTHR45647|PTHR45647
TRINITY_DN1044_c0_g1_i8	0	0	0	12.256	0	0	5.247	0	774.548	824.723	807.386	943.732	651.679	880.582	900.923	1242.38	AT2G45910	Q8GUH1	PF04564|PF00069	PTHR45647:SF100|PTHR45647
TRINITY_DN1044_c0_g1_i9	513.889	485.73	430.021	988.676	670.989	651.562	432.196	851.942	490.349	395.448	240.417	458.581	308.258	677.216	352.401	421.408	AT2G45910	Q8GUH1	PF04564|PF00069	PTHR45647|PTHR45647|PTHR45647:SF100|PTHR45647:SF100
TRINITY_DN1044_c1_g1_i1	229.051	273.405	230.819	441.003	378.954	158.558	659.375	288.977	352.282	157.554	188.262	190.471	166.77	241.549	152.425	274.109	AT1G49710	Q9FX97	PF00852	PTHR11929:SF221|PTHR11929
TRINITY_DN1044_c1_g1_i2	214	167	227	550	378.537	205.337	406	391.001	640.4	192.993	335.587	474.003	223.991	337.526	229.998	306.472	AT3G19280	Q9LJK1	PF00852	PTHR11929|PTHR11929:SF221
TRINITY_DN1044_c1_g3_i1	18.203	12.595	10.181	19.997	7.046	2.442	5.763	22.023	5.318	5.453	1.156	2.526	6.238	7.924	2.577	5.419	AT1G49710	Q9FX97		PTHR11929|PTHR11929:SF221
TRINITY_DN10450_c0_g1_i12	867.048	1729.96	834	1180.01	1168	941.199	423.122	765.606	352	1059.65	922	402	792	846	315	256	AT5G57030	Q38932	PF05834	PTHR39757|PTHR39757:SF6
TRINITY_DN10451_c0_g1_i1	1110.29	1558.08	42.648	48.664	45.128	694.131	73.535	28.514	31.997	89.002	12	32.454	21	35.954	15.998	51.091	AT3G62830	Q9LZI2	PF16363	PTHR43078|PTHR43078:SF19
TRINITY_DN104527_c0_g1_i1	0	3	1	17	16	0	18	18	8	0	5	2	10	8	3	7
TRINITY_DN10452_c0_g1_i2	0	0	2.352	0	0	0	0	4.197	0	0	0	0	0	0	0	0	AT3G17675	P80728	PF02298	PTHR33021:SF171|PTHR33021
TRINITY_DN10452_c0_g1_i3	42.597	82.135	82.199	123.384	48.84	62.025	67.783	68.719	78.607	79.286	96.081	68.299	84.141	101.009	59.014	59.806	AT3G17670
TRINITY_DN10452_c0_g1_i5	34.933	60.819	36.555	79.611	50.16	24.975	51.581	45.984	51.412	26.354	24.829	16.402	18.897	31.22	18.421	20.951	AT3G17675
TRINITY_DN10452_c0_g2_i2	115.642	184.624	101.548	167.428	124.89	119.063	113.411	176.905	128.367	98.968	119.091	104.874	113.86	111.321	82.184	80.033	AT3G17670	Q5XEP2	PF13181	PTHR47682
TRINITY_DN10452_c0_g2_i3	43.827	31.851	3.346	37.582	17.11	16.368	15.772	5.195	10.614	3.373	0	7.424	3.102	7.45	5.381	3.21	AT3G17670			PTHR47682
TRINITY_DN10452_c0_g2_i5	0	0	0	0	0	6.589	1.817	0	0	0	0	0	0	0	0	0	AT3G17670			PTHR47682
TRINITY_DN104544_c1_g1_i1	3	6	3	2	0	2	1	0	0	0	0	0	0	0	0	0		Q9EXL7	PF03466|PF00126	PTHR30118
TRINITY_DN10454_c0_g1_i1	18.832	0	32.07	19.151	32.007	0	11.838	0	0	0	48.132	0	4.575	6.573	0	0	AT2G17010	F4IME2		PTHR31618|PTHR31618:SF8
TRINITY_DN10454_c0_g1_i2	4.862	0	5.231	31.407	0	9.045	14.776	0	5.44	10.312	9.573	0	0	0	6.129	0	AT1G78610	F4IME2		PTHR31618:SF8|PTHR31618
TRINITY_DN10454_c0_g1_i4	0	0	0	23.079	0	0	12.386	13.777	0	0	8.295	0	0	2.407	0	0	AT2G17010	F4IME2	PF00924	PTHR31618|PTHR31618:SF8
TRINITY_DN10454_c0_g1_i5	13.327	27	15.699	69.363	64.993	90.955	0	41.223	59.56	12.657	0	61	138.425	132.02	25.871	65	AT2G17010	F4IME2	PF00924	PTHR31618:SF8|PTHR31618
TRINITY_DN104554_c0_g1_i2	2	10	0	3	0	1	4	8	0	0	0	0	0	0	0	0	AT5G63620	P43951	PF13343	PTHR30006|PTHR30006:SF2
TRINITY_DN104571_c0_g1_i1	0	3	4	7	11	6	2	1	0	0	0	0	0	0	0	0		Q9XAK6	PF01427|PF01427	PTHR43126
TRINITY_DN10457_c0_g1_i1	156.612	229.261	34.541	68.465	41.767	60.363	10.674	69.861	98.478	53.53	44.764	69.082	52.295	33.333	42.451	30.296	AT1G67050			PTHR31722|PTHR31722:SF34
TRINITY_DN10457_c0_g1_i2	159.975	241.739	115.646	183.52	235.48	171.177	241.75	184.915	90.522	87.47	98.236	84.918	122.705	126.855	73.549	80.704	AT5G16160			PTHR14386
TRINITY_DN10457_c0_g1_i3	0	0	43.812	118.242	43.753	8.46	68.576	88.224	0	0	0	0	0	0	0	0				PTHR14386
TRINITY_DN10458_c1_g2_i2	1095.35	946.397	226.376	411.012	240.979	858.072	347.704	314.634	285.53	569.165	188.079	166.707	148.989	79.14	211.93	219.256	AT2G37900	P0CI03	PF00854	PTHR11654|PTHR11654:SF459
TRINITY_DN10458_c1_g2_i9	42.476	35.227	30.796	55.106	12.021	165.9	19.296	27.366	24.47	44.835	15.921	16.293	6.011	14.86	21.07	39.744	AT2G37900	P0CI03	PF00854	PTHR11654|PTHR11654:SF459
TRINITY_DN104604_c0_g1_i1	0	0	0	2	2	0	1	4	0	0	0	0	0	0	0	0		Q47141	PF03466	PTHR30346
TRINITY_DN10460_c0_g1_i2	0	0	0	0	0	0	0	0	0	0	0	0	0	0	0	0				PTHR35587|PTHR35587:SF4
TRINITY_DN10460_c0_g1_i3	0	0	0	0	0	0	0	1	0	0	0	0	0	0	0	0				PTHR35587|PTHR35587:SF4
TRINITY_DN10461_c1_g1_i1	238	290	105	293	280	741.009	205.199	167	207	70	66	249	957	1812.52	107	152	AT2G32120	Q9SKY8	PF00012	PTHR19375:SF101|PTHR19375
TRINITY_DN104630_c0_g2_i1	2	1	6	15	7	5	3	1	0	0	0	1	0	0	0	0	AT5G35370	O65238	PF00069|PF00954	PTHR47976:SF52|PTHR47976
TRINITY_DN10463_c0_g1_i11	94.921	2442.03	131.307	411.391	19.81	45.643	7161.44	829.646	41.682	80.572	12.365	17.929	615.975	22.376	30.264	277.075	AT1G10970	O04089	PF02535	PTHR11040:SF157|PTHR11040
TRINITY_DN10463_c0_g1_i12	4.285	7.725	8.212	45.262	2.553	7.416	23.402	16.833	10.06	2.181	0	2.319	13.781	0	6.07	15.563	AT1G10970	O04089	PF02535	PTHR11040:SF157|PTHR11040
TRINITY_DN10463_c0_g1_i13	0	0	0	0	0	0	0	0	74.852	46.245	23.04	20.289	72.053	23.367	50.345	62.712	AT1G10970	O04089	PF02535	PTHR11040:SF157|PTHR11040
TRINITY_DN10463_c0_g1_i15	0	31.498	0	0	0	0	0	0	0	8.552	0	0	33.78	0	3.808	0	AT1G10970	O04089	PF02535	PTHR11040:SF157|PTHR11040
TRINITY_DN10463_c0_g1_i17	223.506	343.341	139.632	653.809	177.606	225.946	882.208	592.182	260.786	206.449	248.595	151.213	348.767	104.435	262.513	151.784	AT1G10970	O04089	PF02535	PTHR11040|PTHR11040:SF157
TRINITY_DN10463_c0_g1_i6	50.42	504.103	274.838	668.405	248.798	35.872	683.03	624.212	139.62	0	0	86.25	134.644	91.822	0	114.867	AT1G10970	O04089	PF02535	PTHR11040|PTHR11040:SF157
TRINITY_DN10463_c0_g1_i7	29.875	93.253	41.998	128.133	38.237	21.123	109.153	43.724	0	0	0	0	0	0	0	0	AT1G60960	O04089	PF02535	PTHR11040|PTHR11040:SF157
TRINITY_DN104647_c0_g1_i2	0	0	0	0	0	0	0	0	0	0	0	0	0	0	0	0		Q4WXK4
TRINITY_DN104648_c0_g1_i1	0	0	1	0	0	0	2	2	0	0	0	0	0	0	0	0		Q5B7Q7	PF14633	PTHR10145|PTHR10145:SF6
TRINITY_DN10465_c0_g1_i7	78.982	85.578	56	86.998	104.991	65.239	102.986	68	27	20	25	33	50	54	28	28
TRINITY_DN10465_c1_g1_i11	50.82	61.558	19.73	49.488	61.184	44.923	67.009	31.893	48.979	34.167	34.04	17.613	10	29.026	27.937	17.629
TRINITY_DN10465_c1_g1_i13	42.406	86.442	27.27	88.512	26.816	57.077	32.991	57.107	8.021	2.833	5.96	4.387	0	5.974	0	3.371
TRINITY_DN10466_c0_g1_i10	329.318	474.833	235.996	536.358	484.494	318.914	548.698	394.846	499.642	416.127	415.11	455.977	564.418	476.833	397.736	690.706	AT5G08420	E7QBZ1		PTHR12581
TRINITY_DN10466_c0_g1_i2	13.682	31.167	7.004	21.912	30.506	21.086	18.302	21.154	12.358	3.376	6.89	7.023	4.584	11.167	11.264	11.294	AT5G08420	O74777		PTHR12581
TRINITY_DN104679_c0_g1_i2	0	0	0	0	0	0	0	0	20	10	26	18	13	10	15	21
TRINITY_DN10467_c0_g1_i1	0	0	1	6	2	0	9	5	0	0	0	0	1	0	0	0	AT4G22220	Q11119	PF00627|PF00627|PF00443	PTHR24006|PTHR24006:SF655
TRINITY_DN10468_c0_g2_i2	0	0	0	1	0	0	0	0	0	0	1	0	0	0	0	2	AT2G27550	O82088	PF01161	PTHR11362:SF13|PTHR11362
TRINITY_DN10469_c0_g1_i1	87.963	259.949	62	62	65	95.026	20	29	30	13.052	22	23.152	0	28.824	5	2.5	AT5G06940	Q9FL51	PF08263|PF13855|PF13855|PF07714	PTHR48056:SF31|PTHR48056
TRINITY_DN10469_c0_g1_i3	19.037	0	0	0	0	6.974	0	0	0	61.948	0	3.848	29	3.176	5	2.5	AT5G06940	Q9FL51	PF13855|PF13855|PF07714|PF08263	PTHR48056|PTHR48056:SF31
TRINITY_DN1046_c0_g1_i1	617.893	977.571	408	880	700	680.671	994	450.077	550	425	308	407	515	463	293	629	AT4G14200			PTHR35746|PTHR35746:SF1
TRINITY_DN1046_c0_g2_i1	31.985	15	16	49	63	34.651	58.387	12	33	15	7	19	14	15	18	42	AT4G14200			PTHR35746:SF1|PTHR35746
TRINITY_DN104702_c0_g1_i1	4	12.245	1	0	2	1	0	0	0	1	0	0	0	0	0	0	AT5G04940	Q93YF5		PTHR45660|PTHR45660:SF59
TRINITY_DN104702_c0_g1_i3	0	2.755	0	0	0	0	0	0	0	0	0	0	0	0	0	0	AT5G04940	Q93YF5		PTHR45660|PTHR45660:SF59
TRINITY_DN10473_c0_g1_i1	57.693	69.962	53.998	112.762	59.824	76.94	55.171	60.872	27.782	28	8	30.338	22.413	24	20.325	26.789	AT2G25180	Q6K8X6	PF00072	PTHR43874:SF7|PTHR43874
TRINITY_DN10473_c0_g2_i1	4.307	2.038	0	0	0	0	8.829	0	3.738	0	0	5.661	0	0	6.675	0	AT2G25180	P62598	PF00072	PTHR43874|PTHR43874:SF7
TRINITY_DN10473_c0_g2_i2	0	0	10.002	19.238	11	3.06	0	5.128	0	0	3	0	5.587	5	0	2.211	AT2G25180	P62598	PF00072	PTHR43874|PTHR43874:SF7
TRINITY_DN104743_c0_g2_i1	0	0	0	0	0	0	0	0	0	0	0	0	0	0	0	0		P38680	PF01490	PTHR22950:SF479|PTHR22950
TRINITY_DN104748_c0_g1_i1	0	0	0	0	0	0	4	0	0	0	0	0	0	0	0	0			PF08690	PTHR28263
TRINITY_DN104748_c0_g1_i2	0	0	1	3	0	0	4	4	0	0	0	0	0	0	0	0			PF08690	PTHR28263
TRINITY_DN104750_c0_g1_i2	0	0	0	0	0	0	0	0	0	0	0	0	0	0	0	0	AT5G63110	P56518
TRINITY_DN104765_c0_g2_i1	2	5	5	11	3	4	7	6	1	1	0	0	2	2	0	1	AT1G04610	O49312	PF13738	PTHR43539|PTHR43539:SF49
TRINITY_DN10476_c0_g1_i2	20.977	25	51.798	147.95	54.176	146.475	113.066	24	4.529	45.843	8	3	1	2	2	5	AT1G20990		PF03107	PTHR46477|PTHR46477:SF7
TRINITY_DN10476_c0_g1_i4	0	0	0	0	0	0	0	0	2.471	1.157	0	0	0	0	1	0	AT1G20990			PTHR46288:SF21|PTHR46288
TRINITY_DN10476_c0_g1_i5	9.023	0	0	6.351	30.402	0	7.641	0	0	0	0	0	0	0	0	0	AT1G20990		PF03107	PTHR46288:SF21|PTHR46288
TRINITY_DN10476_c0_g1_i6	93	50	12	9	5	285.257	14	23	3	70	6	1	0	0	1	6	AT1G20990		PF03107|PF03107|PF03107	PTHR46288|PTHR46288:SF21
TRINITY_DN10476_c0_g1_i7	16	15	9.202	53.699	32.422	20.525	31.293	40	0	0	0	0	0	0	0	0	AT1G20990			PTHR46288|PTHR46288:SF21
TRINITY_DN10477_c0_g1_i1	1277.25	2193.18	1154.85	1959.89	1787	2237	1349.16	1483.03	1448.63	2369.59	1459.92	1031.93	923.016	770	1189.91	1360.84	AT3G61050	Q9LEX1	PF17047|PF00168	PTHR10774:SF187|PTHR10774
TRINITY_DN10477_c0_g1_i3	230.014	353	112	167.014	135	232.522	228.371	191	134.373	158.415	76.079	96.07	108.984	111	103.088	209.161	AT3G61050	Q9LEX1	PF00168|PF17047	PTHR10774:SF187|PTHR10774
TRINITY_DN10477_c0_g1_i5	0	0	0	0	0	0	0	0	0	0	0	0	0	0	0	0	AT3G61050	Q9LEX1	PF00168|PF17047	PTHR10774:SF187|PTHR10774
TRINITY_DN10478_c0_g1_i6	36	32	108	212	208	43	126	153	178	32	73	79	35	93	65	53
TRINITY_DN1047_c0_g1_i1	93.461	0	0	0	0	0	87.393	0	0	9.196	0	0	0	0	0	0	AT4G21670	Q5YDB6		PTHR23081|PTHR23081:SF27
TRINITY_DN1047_c0_g1_i10	5.685	9.854	0	0	3.711	0	0	0	0	0	0	0	0	0	0	0	AT4G21670	Q5YDB6		PTHR23081:SF17|PTHR23081
TRINITY_DN1047_c0_g1_i11	52.073	46.615	45.062	92.795	41.047	48.469	145.57	50.21	39.974	0	24.404	17.072	19.637	18.229	4.414	42.544	AT4G21670	Q5YDB6		PTHR23081:SF17|PTHR23081
TRINITY_DN1047_c0_g1_i15	0	47.656	37.563	97.414	73.415	49.245	0	57.768	0	0	0	0	0	0	29.419	0	AT4G21670	Q5YDB6		PTHR23081|PTHR23081:SF27
TRINITY_DN1047_c0_g1_i2	155.768	244.362	184.087	317.365	319.15	169.217	355.919	209.109	201.566	119.995	147.237	168.687	104.088	96.135	156.789	233.138	AT4G21670	Q5YDB6	PF00035	PTHR23081:SF17|PTHR23081
TRINITY_DN1047_c0_g1_i4	0	0	0	0	0	0	0	0	0	0	0	0	0	0	0	0	AT4G21670	Q5YDB6		PTHR23081|PTHR23081:SF17
TRINITY_DN1047_c0_g1_i6	97.729	92.09	128.271	174.073	224.836	98.502	260.388	96.577	110.536	60.655	107.649	84.425	38.505	40.886	139.972	148.273	AT4G21670	Q5YDB6	PF00035	PTHR23081:SF17|PTHR23081
TRINITY_DN1047_c0_g1_i8	416.69	279.472	346.125	614.353	601.814	376.854	559.649	472.487	615.924	388.155	413.71	412.816	277.77	282.334	363.407	597.045	AT4G21670	Q5YDB6	PF00035	PTHR23081:SF17|PTHR23081
TRINITY_DN1047_c0_g1_i9	0	0	0	0	0	0	0	26.036	0	0	0	0	0	40.417	0	0	AT4G21670	Q5YDB6	PF00035	PTHR23081:SF17|PTHR23081
TRINITY_DN10481_c0_g1_i5	11	217.004	4	9	10	9	4	4	2	1	1	1	0	0	0	1	AT4G38062	P0CB23		PTHR45287|PTHR45287|PTHR45287
TRINITY_DN10482_c0_g1_i15	7.23	10.369	25.973	23.335	2.326	7.691	18.599	25.396	3.698	3.156	19.256	19.106	10.782	21.273	17.639	31.958	AT5G41580	F4JYG0	PF02891	PTHR10782|PTHR10782:SF84
TRINITY_DN10482_c0_g1_i18	442.919	623.903	483.405	859.346	802.109	429.263	744.333	694.216	162.733	70.328	97.399	115.83	106.487	95.91	87.818	179.59	AT5G41580	F4JYG0	PF02891	PTHR10782|PTHR10782:SF84
TRINITY_DN10482_c0_g1_i20	187.946	311.357	397.52	699.844	525.207	317.232	607.818	612.104	227.241	223.683	178.24	175.413	178.775	278.454	145.597	210.435	AT5G41580	F4JYG0	PF02891	PTHR10782|PTHR10782:SF84
TRINITY_DN10482_c0_g1_i4	138.205	98.759	51.112	174.513	123.367	75.813	73.57	30.968	289.328	213.073	261.081	281.651	360.956	314.363	253.946	307.016	AT5G41580	F4JYG0	PF02891	PTHR10782:SF84|PTHR10782
TRINITY_DN10483_c0_g1_i10	0	5.993	0	2.281	3.203	0	11.777	6.178	0	0	1.743	1.847	0	1.632	1.334	1.404	AT2G43190	Q9ZW76		PTHR13348
TRINITY_DN10483_c0_g1_i11	45.997	76.959	19.473	53.146	38.71	29.816	61.338	34.288	30.44	22.709	21.851	0	23.31	22.777	29.246	38.323	AT2G43190	Q9ZW76	PF01868	PTHR13348
TRINITY_DN10483_c0_g1_i12	0	0	0	0	0	0	0	0	0	0	6.574	19.476	0	0	0	12.207	AT2G43190	Q9ZW76	PF01868	PTHR13348|PTHR13348
TRINITY_DN10483_c0_g1_i4	2.211	6.255	5.338	10.639	8.209	2.497	6.558	1.625	1.584	1.524	0	8.3	1.632	0	0	1.493	AT2G43190	Q9ZW76	PF01868	PTHR13348
TRINITY_DN10483_c0_g1_i5	20.792	21.793	7.188	5.934	8.878	12.687	15.328	18.909	24.976	12.767	5.832	35.377	10.058	11.591	18.42	21.573	AT2G43190	Q9ZW76	PF01868	PTHR13348
TRINITY_DN10486_c0_g1_i1	78	113	115	227	104	77	53	122	119	49	101	126	65	108	85	30	AT1G73850		PF07891	PTHR46702:SF2|PTHR46702
TRINITY_DN10486_c0_g1_i2	274	317.396	153.146	321	232.001	213	292.006	260	146	75	84	79	86	113	83	69	AT4G24370
TRINITY_DN10486_c0_g1_i7	90	76	81	146	78	154	38	59	28	221.776	33	16	49	31	35	41	AT1G73850		PF07891	PTHR46702|PTHR46702:SF2
TRINITY_DN104885_c0_g2_i1	0	0	0	0	0	0	3	6	1	0	1	0	0	0	18	4	AT4G37990	Q9P4C2	PF08240|PF00107	PTHR42940|PTHR42940:SF1
TRINITY_DN10488_c0_g1_i1	0	132.762	0	92.266	24.988	0	45.918	42.825	54.03	110.5	38.388	62.053	105.912	105.984	48.797	101.616	AT1G17120	Q9SHH0	PF13906|PF13520	PTHR43243|PTHR43243:SF62
TRINITY_DN10488_c0_g1_i14	59.77	0	17.88	5.414	0	19.542	4.546	0	0	0	0	0	29.036	7.443	9.203	40.189	AT1G17120	Q9SHH0	PF13906|PF13520	PTHR43243:SF62|PTHR43243
TRINITY_DN10488_c0_g1_i2	0	133.157	0	0	0	10.295	0	0	43.97	72.5	28.649	36.947	0	0	0	0	AT1G17120	Q9SHH0	PF13906|PF13520	PTHR43243:SF62|PTHR43243
TRINITY_DN10488_c0_g1_i9	77.23	72.081	85.12	17.32	32.012	39.164	19.536	9.175	0	0	27.963	0	47.052	52.573	0	27.195	AT1G17120	Q9SHH0	PF13906|PF13520	PTHR43243|PTHR43243:SF62
TRINITY_DN1048_c0_g1_i1	85.168	43	54	93	98.989	127.99	70.999	65	39.361	50.308	28.481	46.999	48	49.565	37.448	44	AT5G01520
TRINITY_DN1048_c1_g1_i1	176.197	202.113	124.793	190.613	140.971	148.002	169.358	119.222	46.74	103.587	61.871	73.132	42.04	70.447	45.78	82.504	AT1G43760			PTHR33710|PTHR33710:SF28
TRINITY_DN1048_c1_g1_i8	71.472	112.523	62.968	94.65	67.941	74.207	92.708	62.919	20.359	28.833	33.237	11.505	29.9	61.937	18.729	31.323
TRINITY_DN1048_c1_g2_i11	85.873	176.522	44.106	124.466	88.024	90.039	131.765	16.385	11.697	35.63	20.58	27.341	11.943	30.212	11.792	26.017	AT1G43760
TRINITY_DN1048_c1_g2_i14	157.992	135.914	96.449	102.923	156.822	113.776	52.409	85.678	9.879	0	8.32	8.091	12.288	6.167	6.043	6.21
TRINITY_DN1048_c1_g2_i2	14.548	13.425	0	9.401	4.497	18.981	0	0	0	10.999	8.991	0	0	3.48	3.457	0
TRINITY_DN1048_c1_g2_i3	39.917	13.504	25.607	18.947	8.745	11.996	35.759	7.796	18.326	13.952	0	3.931	26.829	23.756	10.2	5.945
TRINITY_DN1048_c1_g2_i5	0	0	12.077	0	0	0	0	0	0	0	0	0	0	0	0	0	AT1G43760			PTHR33710|PTHR33710:SF28
TRINITY_DN104903_c0_g1_i1	0	0	0	0	0	0	0	2	0	0	0	0	0	0	0	5		Q3E756		PTHR28139
TRINITY_DN104925_c0_g1_i1	0	3	0	0	0	0	0	0	0	0	0	0	0	0	0	0	AT4G01440	Q9M130	PF00892|PF00892	PTHR31218:SF233|PTHR31218
TRINITY_DN10492_c0_g1_i2	7	238	4	1	2	20	3	4	0	6	0	0	0	0	0	5	AT1G18550	F4ICA0	PF00225	PTHR47968:SF13|PTHR47968
TRINITY_DN10492_c1_g1_i1	299	503	343.37	625.261	706	454.006	661.5	546.001	370	312	272	396	456	403	286	492	AT1G13870	Q9LMH0	PF08433	PTHR12435:SF4|PTHR12435
TRINITY_DN10493_c0_g1_i3	749.644	1459	528.822	750	572	600.275	775.987	842	373	430	198	232	844	397	171	702	AT4G30810	P55748	PF00450	PTHR11802:SF32|PTHR11802
TRINITY_DN104946_c1_g1_i1	0	0	0	0	0	0	0	1	0	0	0	0	0	0	0	3			PF18592
TRINITY_DN104950_c0_g1_i1	0	0	0	0	0	0	0	0	0	0	0	0	0	0	0	0	AT3G57140	P36165	PF01734	PTHR14226|PTHR14226:SF10
TRINITY_DN104959_c0_g1_i1	0	4	2	1	2	2	4	2	0	0	0	0	0	0	0	0		P0AEX7	PF02653	PTHR11795
TRINITY_DN10496_c0_g1_i1	259.092	385	55	89	95	254	168	78	178	211	106	129	193	166	150	573	AT5G53560	Q42342	PF00173	PTHR19359:SF103|PTHR19359
TRINITY_DN10497_c0_g1_i1	72.586	344.942	37.068	101.776	66.441	60.341	138.23	67.947	72.024	71.178	52.239	63.345	162.434	57.946	44.336	57.278	AT1G49510			PTHR36000:SF3|PTHR36000
TRINITY_DN10497_c0_g1_i2	19.414	38.058	1.932	9.224	3.559	1.659	16.77	11.053	15.976	3.822	9.761	17.655	30.566	9.054	11.664	22.722				PTHR36000|PTHR36000:SF3
TRINITY_DN10497_c1_g1_i11	280.075	248.661	228.741	552.893	390.218	368.806	493.153	465.824	342.214	270.61	215.027	255.316	217.463	329.697	209.999	370.647	AT4G26750	Q9SZ15	PF18097	PTHR46009
TRINITY_DN10497_c1_g1_i15	173.545	120.675	82.043	311.676	183.051	335.457	156.49	119.87	0	0	0	0	0	0	0	0	AT4G26750	Q9SZ15	PF18097|PF18097	PTHR46009|PTHR46009
TRINITY_DN10497_c1_g1_i2	137.406	132.662	150.917	242.679	253.667	185.821	273.545	171.962	247.786	155.39	186.968	185.684	198.537	264.302	169	240.357	AT4G26750	Q9SZ15	PF18097	PTHR46009
TRINITY_DN104984_c0_g1_i1	0	0	0	0	0	0	0	1	0	0	0	0	0	0	0	1		P11075
TRINITY_DN10498_c0_g1_i1	226	524.016	220	478.992	415.632	220.004	304.914	391.955	218	323.015	222	206	762	678	225	282	AT4G38160	Q9SZL6	PF02536	PTHR13068:SF5|PTHR13068
TRINITY_DN10499_c0_g1_i1	221.432	343.88	202.339	293.407	272.647	156.13	296.808	226.347	180.663	216.392	172.596	137.644	247.955	205.42	161	173.848	AT2G28150	Q8GYT8	PF06136	PTHR31083:SF6|PTHR31083
TRINITY_DN10499_c0_g1_i4	0	0	0	0	0	0	0	0	37.228	9.608	13.212	0	0	4.342	0	0	AT2G28150	Q8GYT8	PF06136	PTHR31083:SF6|PTHR31083
TRINITY_DN10499_c0_g1_i5	1.33	12.582	0	2.914	2.771	8.215	0	1.215	1.109	0	1.192	0	1.179	1.238	0	0	AT2G28150	Q8GYT8	PF06136	PTHR31083|PTHR31083:SF6
TRINITY_DN10499_c0_g1_i6	52.239	69.538	30.661	15.996	19.583	26.246	56.085	26.437	0	0	0	36.356	7.866	0	0	33.152	AT2G28150	Q8GYT8	PF06136	PTHR31083|PTHR31083:SF6
TRINITY_DN1049_c0_g1_i1	211.758	144.571	141.456	276.355	250.049	373.818	220.102	216.74	156.634	110.743	165.162	110.054	85.413	132.011	179.436	154.736	AT1G71980	Q8VZ14	PF13639|PF02225	PTHR22765|PTHR22765:SF308
TRINITY_DN1049_c0_g1_i2	550.41	659.081	457.063	788.012	688	625	567.185	589.087	515.78	673.814	578.755	515.616	445.819	565.432	510	586.608	AT1G71980	Q8VZ14	PF02225|PF13639	PTHR22765|PTHR22765:SF308
TRINITY_DN1049_c0_g1_i3	85.242	113.33	41.621	46.658	66.796	134.182	18.898	5.48	16.403	28.257	57.838	25.946	46.587	50.989	6.564	28.264	AT1G71980	Q8VZ14	PF13639|PF02225	PTHR22765:SF308|PTHR22765:SF308|PTHR22765|PTHR22765
TRINITY_DN1049_c1_g1_i5	391.225	586.932	251.433	457.579	368.764	537.467	509.659	336.103	442	403.036	227.756	273.692	262.49	262.812	201.048	488.11	AT3G61670	Q9FHK4	PF11331	PTHR31105:SF37|PTHR31105
TRINITY_DN1049_c1_g1_i8	321.196	240.742	146.376	323.759	213.308	337.628	555.528	299.494	206	124.964	115.342	327.308	257.51	724.739	174.944	288.89	AT3G61670	Q9FHK4	PF11331	PTHR31105:SF37|PTHR31105
TRINITY_DN1049_c2_g1_i1	0	0	0	7	0	0	0	0	6	13.551	6	5	0	0	5	7.164	AT1G33250		PF04646	PTHR10811|PTHR10811:SF56
TRINITY_DN1049_c2_g1_i2	48	120	6	0	21	57	8	18	0	8.449	0	0	12	7	0	25.836	AT1G33250		PF04646	PTHR10811|PTHR10811:SF56
TRINITY_DN104_c0_g1_i1	65.482	31.608	0	0	0	68.746	29.877	26.337	3.027	0	32.001	13.697	29.806	24.268	12.406	13.028	AT2G37150			PTHR22937|PTHR22937:SF172
TRINITY_DN104_c0_g1_i10	162.798	0	36.853	130.278	163.19	62.79	41.962	104.616	63.346	33.144	30.509	18.271	20.092	102.87	7.716	47.978	AT2G37150			PTHR22937|PTHR22937:SF172
TRINITY_DN104_c0_g1_i11	758.027	423.348	987.143	1823.39	1218.11	876.389	1144.29	1217.82	589.363	386.317	469.459	413.178	276.73	461.902	260.647	427.227	AT2G37150	Q7XTV7	PF13639	PTHR22937|PTHR22937:SF172
TRINITY_DN104_c0_g1_i13	0	0	73.449	283.675	40.361	0	0	100.866	0	0	0	0	0	0	0	0	AT2G37150	Q7XTV7		PTHR22937|PTHR22937:SF172
TRINITY_DN104_c0_g1_i14	112.383	47.655	43.139	101.65	114.584	137.721	73.639	69.49	86.471	142.825	66.403	69.126	84.358	119.084	71.11	111.237	AT2G37150	Q7XTV7		PTHR22937:SF172|PTHR22937
TRINITY_DN104_c0_g1_i15	0	106.783	221.4	512.302	229.503	122.172	211.907	200.911	110.911	39.312	49.277	105.227	41.749	41.574	45.295	64.675	AT2G37150	Q7XTV7	PF13639	PTHR22937:SF172|PTHR22937
TRINITY_DN104_c0_g1_i17	516.384	456.217	602.748	1280.35	1108.55	613.68	1110.06	1009.74	794.981	438.544	518.212	625.501	448.159	510.556	532.989	743.347	AT2G37150	Q7XTV7	PF13639	PTHR22937:SF172|PTHR22937
TRINITY_DN104_c0_g1_i22	204.923	77.658	189.926	0	0	124.403	163.754	61.818	112.139	142.859	183.138	78.999	40.106	178.745	68.141	61.508	AT2G37150	Q7XTV7	PF13639	PTHR22937:SF172|PTHR22937
TRINITY_DN104_c0_g1_i9	0	0	65.384	139.293	180.167	0	0	0	0	0	0	0	0	0	0	0	AT2G37150			PTHR22937|PTHR22937:SF172
TRINITY_DN10501_c0_g1_i10	56.869	0	0	93.712	34.369	9.225	0	50.841	194.617	178.298	94.448	115.823	145.726	223.442	56.38	205.807	AT1G53320	Q93VI8	PF01167	PTHR16517:SF50|PTHR16517
TRINITY_DN10501_c0_g1_i11	492.75	658.298	192.475	425.83	511.663	342.625	575.739	477.743	279.26	375.932	208.862	257.349	546.29	590.576	152.711	438.767	AT1G53320	Q93VI8	PF01167|PF00646	PTHR16517|PTHR16517:SF50
TRINITY_DN10501_c0_g1_i12	175.256	302.34	178.184	186.613	260.639	244.69	280.869	149.054	0	0	0	0	22.242	0	45.162	0	AT1G53320	Q93VI8	PF00646|PF01167	PTHR16517:SF50|PTHR16517
TRINITY_DN10501_c0_g1_i2	9.694	128.586	45.065	35.242	49.493	157.91	163.93	9.61	176.724	0	132.255	165.946	0	0	249.959	226.375	AT1G53320	Q93VI8	PF01167	PTHR16517|PTHR16517:SF50
TRINITY_DN10501_c0_g1_i3	693.88	887.033	381.275	870.603	782.177	658.551	903.613	815.749	425.919	414.79	389.526	410.903	388.742	526.982	365.788	428.051	AT1G53320	Q93VI8	PF00646|PF01167	PTHR16517|PTHR16517:SF50
TRINITY_DN10501_c0_g3_i1	1072.82	2156	1180.65	2148.16	2471.85	1267.01	2544.47	2223.9	1950.14	1487.69	1592.97	1806.98	2625.61	2207.81	1886	2273	AT3G58680	Q9LXT3	PF01381|PF08523	PTHR10245:SF118|PTHR10245
TRINITY_DN10503_c0_g1_i1	1106.63	2079.58	818.107	1119.07	1050.94	982.512	1253.03	1000.75	570.848	569.068	463.991	422.418	811.469	1036.55	325.342	657.597	AT1G79570	Q9C9U5	PF07714|PF00564	PTHR23257|PTHR23257:SF846|PTHR23257|PTHR23257:SF846
TRINITY_DN10503_c0_g1_i2	88.294	128.179	43.901	154.565	94.017	67.121	68.849	136.798	19.612	25.106	31.012	27.569	18.213	70.957	49.658	47.291	AT1G79570	Q9C9U5	PF00564|PF07714	PTHR23257|PTHR23257|PTHR23257:SF846|PTHR23257:SF846
TRINITY_DN10503_c0_g1_i4	23.1	13.932	6.676	10.717	19.133	4.135	5.675	3.99	0	0	3.998	7.013	7.056	6.964	0	3.974	AT1G79570	Q9C9U5	PF07714|PF00564	PTHR23257:SF846|PTHR23257|PTHR23257|PTHR23257:SF846
TRINITY_DN10503_c0_g1_i8	7.971	10.365	0	5.649	13.905	9.612	6.53	24.461	1.54	1.826	0	0	1.749	6.525	0	6.138	AT1G79570		PF00564	PTHR23257|PTHR23257:SF846|PTHR23257|PTHR23257:SF846
TRINITY_DN105044_c0_g1_i1	0	0	0	0	0	0	0	6	0	0	0	0	0	0	0	1	AT5G45970	Q9HF51	PF00071	PTHR24072|PTHR24072:SF186
TRINITY_DN10504_c0_g1_i1	498.564	425.645	795.789	951.874	774.242	746.326	522.538	560.052	537.669	378.813	274.346	215.649	199.267	104.44	105.887	123.141	AT2G24280	Q2TA14	PF05577	PTHR11010:SF80|PTHR11010
TRINITY_DN10504_c0_g1_i2	50.303	6.596	8.577	32.453	2.583	37.629	32.999	31.55	31.303	11.983	25.831	0	9.405	5.373	0	0	AT2G24280	Q5RBU7	PF05577	PTHR11010|PTHR11010:SF80
TRINITY_DN10504_c0_g1_i4	19.618	2.769	26.662	104.557	69.97	54.797	19.939	34.745	0	0	0	2.468	0	0	6.4	7.91	AT2G24280	P42785	PF05577	PTHR11010|PTHR11010:SF80
TRINITY_DN10504_c0_g1_i5	0	0	0	0	0	0	19.109	28.855	13.864	0	0	4.447	13.221	13.933	0	0	AT2G24280	Q5RBU7	PF05577	PTHR11010:SF80|PTHR11010
TRINITY_DN10504_c0_g1_i6	530.311	606.47	694.97	914.548	595.232	875.35	920.877	913.174	0	47.422	0	48.436	0	0	22.714	18.949	AT2G24280	Q2TA14	PF05577	PTHR11010:SF80|PTHR11010
TRINITY_DN10504_c0_g1_i7	0	10.519	0	56.589	0	0	0	0	40.165	5.782	37.824	0	18.107	29.253	0	0	AT2G24280	P42785	PF05577	PTHR11010|PTHR11010:SF80
TRINITY_DN105051_c0_g1_i1	0	0	0	0	0	0	0	0	0	0	0	0	0	0	0	0
TRINITY_DN10506_c0_g1_i1	10	29	33	84.047	52	13	51	35	43	15	38	29	52	27	21	33	AT5G48910	Q9FI80	PF13041|PF01535|PF01535|PF12854|PF14432	PTHR47926|PTHR47926:SF195
TRINITY_DN105080_c0_g1_i1	0	0	0	0	0	0	5	6	2.906	0	0	0	0	0	1.181	0		Q96V64	PF00150	PTHR31297:SF1|PTHR31297
TRINITY_DN105080_c0_g1_i3	0	0	0	0	0	0	0	1	9.094	1	0	0	0	0	3.819	0		Q96V64	PF00150	PTHR31297|PTHR31297:SF1
TRINITY_DN105090_c0_g2_i1	314.164	305	214	413	367.029	358.242	550.238	325.277	369	280	204	243	357	259.978	307	613	AT1G18480	Q944L7	PF00149	PTHR47680
TRINITY_DN105099_c0_g1_i1	2.777	6.576	2	3	1	1.15	0	2	0	3.334	2.587	1.239	1.282	2.23	1.307	3	AT3G28630		PF04601	PTHR31205|PTHR31205:SF42
TRINITY_DN105099_c0_g1_i2	4.223	4.424	0	0	0	9.85	3	0	21	12.666	19.413	34.761	30.718	27.77	4.693	6	AT3G28630		PF04601	PTHR31205|PTHR31205:SF42
TRINITY_DN10509_c0_g1_i1	94.705	36.68	67.252	153.876	79.847	38.935	71.283	141.503	31.24	2.028	14.524	8.749	23.247	47.751	2.189	10.676	AT3G19000	Q9ZSA7	PF03171|PF14226	PTHR10209|PTHR10209:SF727
TRINITY_DN10509_c0_g1_i2	34.06	43.404	72.416	158.142	70.78	40.256	49.433	178.336	24.524	20.856	46.692	11.493	15.981	4.349	13.639	18.02	AT3G19000	Q9ZSA7	PF14226	PTHR10209:SF678|PTHR10209
TRINITY_DN10509_c0_g1_i3	0	0	21.718	32.884	2.539	6.361	22.321	23.161	31.017	4.136	32.65	5.005	29.888	62.653	23.59	42.482	AT3G19000	A0A023GS29	PF14226	PTHR10209:SF664|PTHR10209
TRINITY_DN10509_c0_g1_i6	384.238	1730.55	773.614	891.107	566.834	599.129	192.963	0	640.219	808.023	619.183	622.754	854.884	660.247	321.582	600.822	AT3G19000	Q9ZSA7	PF03171|PF14226	PTHR10209|PTHR10209:SF727
TRINITY_DN10509_c1_g2_i1	244.028	640.134	654	948.815	583.168	503.38	327.221	333.812	574	450	458	612.113	1452	1523.84	250	457	AT3G19000	W5QJZ5	PF14226	PTHR10209:SF678|PTHR10209
TRINITY_DN105103_c0_g1_i2	0	0	0	0	0	0	0	0	0	0	0	0	0	0	0	0		Q8NKB6	PF00026	PTHR47965:SF25|PTHR47965
TRINITY_DN105103_c0_g1_i4	0	0	0	0	0	0	0	5	0	0	0	0	0	0	0	0		Q8NKB6	PF00026	PTHR47965:SF25|PTHR47965
TRINITY_DN105108_c0_g1_i2	0	0	0	0	0	0	1	0	0	0	0	0	0	0	0	0		Q6F6Y2		PTHR13789|PTHR13789:SF313
TRINITY_DN105138_c0_g1_i1	0	0	0	0	0	0	0	3	1	0	0	0	0	0	1	8	AT2G20450	P38754	PF01929	PTHR11127|PTHR11127:SF2
TRINITY_DN10513_c0_g1_i1	30.71	34.433	25.279	39.278	63.006	11.645	48.352	34.854	45.299	0	29.81	14.818	5.472	34.144	11.078	16.709	AT4G16110	Q9ZWJ9	PF00072	PTHR43874:SF58|PTHR43874
TRINITY_DN10513_c0_g1_i6	77.271	42.567	85.721	217.722	183.095	63.355	112.648	145.146	52.543	17	53.19	48.182	21.528	48.856	39.922	25.291	AT4G16110	Q9ZWJ9	PF00072|PF00249	PTHR43874:SF58|PTHR43874
TRINITY_DN105148_c0_g1_i4	0	4	5	2	5	4	1	4	0	0	0	1	0	0	0	0	AT3G11980	Q08891	PF07993|PF03015	PTHR11011|PTHR11011:SF68
TRINITY_DN105149_c0_g1_i1	0	0	0	0	0	0	0	0	1	1	2	0	1	0	1	2
TRINITY_DN105156_c0_g2_i4	0	0	0	0	0	0	1	14	0	0	1	0	0	0	2	2		Q0UME8	PF07823	PTHR28141:SF1|PTHR28141
TRINITY_DN10516_c0_g2_i3	181.035	435.002	217.251	286	174	229.147	172.993	243	234.001	250	135	143	242	278	51	298	AT1G49570	Q9FX85	PF00141	PTHR31388:SF180|PTHR31388
TRINITY_DN10517_c0_g1_i11	418.087	532.139	290.421	511.155	519.339	434.959	722.131	387.726	159.125	203.924	113.219	125.177	103.222	153.457	123.942	345.144	AT4G08180	Q8L751	PF01237|PF15413	PTHR10972:SF163|PTHR10972
TRINITY_DN10517_c0_g1_i13	58.519	55.952	49.934	104.044	80.428	76.985	91.781	83.319	40.731	41.317	42.159	33.579	23.905	37.405	32.748	57.603	AT4G08180	Q8L751	PF01237|PF15413	PTHR10972|PTHR10972:SF163
TRINITY_DN10517_c0_g1_i2	237.317	181.289	85.992	165.914	132.585	213.444	199.632	155.658	34.527	30.661	14.919	28.437	24.635	22.877	21.983	31.655	AT4G08180	Q8L751	PF15413|PF01237	PTHR10972|PTHR10972:SF163
TRINITY_DN10517_c0_g1_i3	0	0	0	0	0	0	0	0	0	0	0	0	0	0	0	0	AT4G08180	Q8L751	PF01237|PF15413	PTHR10972|PTHR10972:SF163
TRINITY_DN10517_c0_g1_i4	568.505	632.855	372.735	672.915	577.624	611.704	761.153	570.869	310.355	276.728	166.31	189.146	161.332	294.72	171.577	355.531	AT4G08180	Q8L751	PF15413|PF01237	PTHR10972|PTHR10972:SF163
TRINITY_DN10517_c0_g1_i7	156.144	122.856	91.45	126.133	104.432	131.796	112.102	101.453	43.535	60.806	34.34	33.064	43.376	78.968	24.153	66.752	AT4G08180	Q8L751	PF01237|PF15413	PTHR10972|PTHR10972:SF163
TRINITY_DN10517_c0_g1_i9	107.427	105.868	41.471	131.023	71.613	149.159	103.114	107.401	48.726	35.564	21.053	23.596	15.529	30.573	13.597	28.315	AT4G08180	Q8L751	PF15413	PTHR10972:SF163|PTHR10972
TRINITY_DN10517_c0_g2_i2	0	0	0	0	0	0	0	0	0	0	0	0	0	0	0	0	AT4G08180
TRINITY_DN10517_c1_g1_i1	375.301	700.795	262.238	378.894	398.745	348.188	554.025	361.374	375	335.652	306.496	292.994	454.257	414.868	273.516	408.136	AT2G39960	P58684	PF06703	PTHR13085
TRINITY_DN10517_c1_g1_i8	0	0	0	6.969	0	0	0	0	0	0	0	0	0	0	0	0	AT2G39960	P58684	PF06703	PTHR13085
TRINITY_DN10517_c1_g1_i9	14.699	45.205	16.762	46.137	17.255	1.812	29.016	21.674	0	7.348	19.504	18.006	0	15.524	12.484	8.864	AT4G04200	P58684	PF06703	PTHR13085
TRINITY_DN105182_c0_g1_i1	0	0	0	0	0	0	0	2	0	0	1	0	0	0	3	4
TRINITY_DN105188_c1_g1_i1	0	0	0	0	0	0	0	2	0	0	0	0	0	0	0	0		Q12177	PF13460	PTHR48079:SF4|PTHR48079
TRINITY_DN105191_c0_g1_i9	0	0	7.989	28	7	1	46	35	0	0	0	0	0	0	0	0
TRINITY_DN10519_c0_g2_i3	132.108	163.351	105.982	166.349	122.474	129.782	162.792	100.866	29.172	8.044	49.916	0	26.857	17.811	46.883	19.78	AT1G55250	Q9C895		PTHR23163|PTHR23163:SF0
TRINITY_DN10519_c0_g2_i4	141.964	186.101	141.858	249.649	258.145	122.676	161.534	194.673	204.063	149.811	172.103	162.591	185.771	282.207	142.073	211.204	AT1G55250	Q9C895		PTHR23163|PTHR23163:SF0
TRINITY_DN10519_c0_g2_i7	121.935	217.548	131.161	243.977	234.381	172.542	161.675	169.462	122.765	103.786	74.98	139.409	93.373	179.982	56.044	126.016	AT1G55250	Q9C895		PTHR23163|PTHR23163:SF0
TRINITY_DN1051_c0_g1_i3	722.998	1052.92	702.068	1032.6	1069.97	918.921	940.962	739.003	376	614	281.02	262.947	237	135.995	364	548.106	AT4G37370	W8JMU7	PF00067	PTHR24298|PTHR24298:SF683
TRINITY_DN1051_c0_g1_i6	32.389	40.338	23.991	45.143	32.19	62.187	58.062	40.979	0	13	0	14.053	3	0	0	0	AT4G37370	W8JMU7	PF00067	PTHR24298|PTHR24298:SF836
TRINITY_DN1051_c0_g1_i7	30.613	46.743	0	20.857	39.81	19.813	0	5.078	7	0	5.014	0	0	1.005	8	10.894	AT4G37370	W8JMU7	PF00067	PTHR24298|PTHR24298:SF836
TRINITY_DN10520_c0_g1_i1	2580.52	5578.86	2436.53	4294.69	2978.52	2097.53	3725.73	3812.3	1809.69	2558.99	2616.99	2861.87	4889	3911.21	3038.91	2861.68	AT4G24770	Q04836	PF00076|PF00076	PTHR48025:SF8|PTHR48025
TRINITY_DN10520_c0_g1_i4	59.31	68.584	46.402	132.388	82.476	53.105	84.545	62.084	39.431	42.654	70.358	59.224	36.844	68.128	64.473	50.316	AT4G24770	Q04836	PF00076	PTHR48025|PTHR48025:SF8
TRINITY_DN105228_c0_g3_i1	2	7	0	2	0	0	0	1	0	0	0	0	0	0	0	0		O52063	PF07969	PTHR32027|PTHR32027:SF9
TRINITY_DN10522_c0_g2_i1	45	47	27	97	82	49	79	66	80	49	92	82	195	155	106	146	AT3G46870	Q9STF9	PF13041	PTHR46870|PTHR46870:SF2
TRINITY_DN10523_c0_g1_i13	24.677	55.784	129.806	316.576	227.996	101.719	180.917	329.33	137.297	118.897	169.463	217.66	150.346	155.648	142.171	172.385	AT5G50640
TRINITY_DN10523_c0_g1_i14	852.025	921.625	924.485	1967.05	1705.08	864.027	1687.35	1689.15	1193.97	870.954	1041.15	1534.94	1046.6	1275.88	974.609	1067.88	AT5G50640	P0DH79	PF00571|PF00571|PF00571|PF00571|PF00564	PTHR13780|PTHR13780:SF48
TRINITY_DN10523_c0_g1_i4	37.094	40.622	52.188	158.883	113.068	54.254	76.741	81.071	79.804	23.149	78.375	72.2	15.182	41.704	33.575	45.738	AT5G50640	P0DH79	PF00571|PF00571|PF00571|PF00571	PTHR13780|PTHR13780:SF48
TRINITY_DN10523_c0_g5_i1	94	63	38.002	38	34	76	44.009	56.804	64.212	23	20.001	31.146	37	40	92.321	190	AT5G49120	Q9FH22	PF04570	PTHR33059|PTHR33059:SF84
TRINITY_DN105243_c0_g1_i1	2	4	2	1	0	0	5	1	2	1	5	3	0	1	1	1
TRINITY_DN10524_c0_g1_i4	0	1.482	0	13.543	0	2.011	0	0	0	0	0	0	2.327	5.053	0	0		Q9FHM0
TRINITY_DN10524_c0_g1_i6	112	143.231	14	23.457	38	113.875	41	36	38	47	16	25	35.673	32.947	22	42	AT5G51640	Q8VYS5	PF14416|PF13839	PTHR32285|PTHR32285:SF18
TRINITY_DN10524_c0_g1_i8	0	4.286	0	0	0	3.004	0	0	0	0	0	0	0	0	0	0	AT5G51640	Q9FHM0	PF14416|PF13839	PTHR32285:SF18|PTHR32285
TRINITY_DN105258_c0_g1_i1	0	0	0	0	0	0	0	0	0	0	0	0	0	0	0	0	AT5G09230	C8V3W5	PF02146	PTHR11085:SF15|PTHR11085
TRINITY_DN10525_c0_g1_i1	4.183	78.362	4	0	0	0	0	0	0	0	0	0	0	0	0	2	AT1G31360	P15043	PF14493|PF00271|PF00270|PF16124|PF09382|PF00570	PTHR13710:SF120|PTHR13710
TRINITY_DN10525_c0_g1_i13	0	3.68	0	0	1	0	0	0	0	0	0	0	0	0	0	0	AT1G31360	P15043	PF09382|PF16124|PF00270|PF00271	PTHR13710:SF120|PTHR13710
TRINITY_DN10525_c0_g1_i16	0	2.014	0	0	0	0	0	0	0	0	0	0	0	0	0	0	AT4G35740	P15043	PF00271|PF16124|PF00270	PTHR13710|PTHR13710:SF120
TRINITY_DN10525_c0_g1_i17	14.817	15.961	0	2	0	5.013	0	1	0	2	0	0	0	1	0	0		Q5UPX0	PF16124|PF09382	PTHR13710|PTHR13710:SF120
TRINITY_DN10525_c0_g1_i18	0	25.103	0	0	0	1.987	0	0	0	0	3	4	0	0	0	0	AT1G31360	P15043	PF09382|PF00270|PF16124|PF00271	PTHR13710|PTHR13710:SF120
TRINITY_DN10525_c0_g1_i2	0	19.88	0	0	0	0	0	0	3	0	0	0	0	0	0	0	AT1G31360	P15043	PF09382|PF00271|PF00270|PF16124|PF00570	PTHR13710|PTHR13710:SF120
TRINITY_DN10525_c0_g1_i8	0	0	0	0	0	0	0	1	0	0	0	0	0	0	1	0	AT1G31360	P15043	PF00271|PF00270	PTHR13710|PTHR13710:SF120
TRINITY_DN105263_c0_g1_i1	0	0	0	0	0	0	0	0	0	0	0	0	0	0	0	0		Q5ADM9	PF02366	PTHR10050:SF52|PTHR10050
TRINITY_DN10527_c0_g1_i5	10.358	38.58	1.694	11.438	5.819	30.069	0	0	0	0	0	0	0	0	1	2	AT5G06390	Q66GR0	PF02469|PF02469	PTHR32499:SF16|PTHR32499
TRINITY_DN10527_c0_g1_i7	17.642	76.42	10.306	8.562	6.181	36.931	3	1	2	14	7	6	10	3	0	0	AT5G06390	Q66GR0	PF02469|PF02469	PTHR32499:SF16|PTHR32499
TRINITY_DN10528_c0_g1_i1	129	76	161	289	367	161.016	221.24	342.262	156	270	253	166	161	76	364	337	AT1G75390	C0Z2L5	PF00170	PTHR45764|PTHR45764:SF38
TRINITY_DN10528_c0_g2_i1	1197.93	2670.32	414.009	462	292	486	651.999	758	259.04	247	255	296	546.074	640	152	132	AT1G75390	C0Z2L5	PF00170	PTHR45764|PTHR45764:SF38
TRINITY_DN10529_c0_g1_i1	24.523	2.607	29.792	59.101	32.898	0	14.045	15.27	5.036	0	22.269	4.212	17.263	12.927	0	0	AT2G36990	Q9LD95	PF04542|PF04539|PF04545	PTHR30603|PTHR30603|PTHR30603:SF50|PTHR30603:SF50
TRINITY_DN10529_c0_g1_i3	23.481	62.191	19.756	45.253	46.217	27.657	1.608	5.382	1.888	8.637	6.414	1.715	14.705	3.377	4.25	0	AT2G36990	Q9LD95		PTHR30603:SF50|PTHR30603
TRINITY_DN10529_c0_g1_i4	376.996	756.246	326.915	712.038	499.652	465.38	354.36	368.669	357.076	645.363	500.317	371.073	811.812	647.689	279.75	268.68	AT2G36990	Q9LD95	PF04545|PF04542|PF04539	PTHR30603|PTHR30603:SF50
TRINITY_DN10529_c0_g1_i6	0	13.443	4.537	0	22.447	0	0	11.157	0	0	0	0	0	27.007	0	15.32	AT2G36990	Q9LD95	PF04542	PTHR30603|PTHR30603:SF50
TRINITY_DN1052_c0_g1_i1	28	32	35	36.62	44	34.214	50.001	39.69	24	18	30.664	21	42	21	22	32	AT3G51320	Q0WVU0	PF13041|PF13041|PF01535|PF01535|PF01535|PF01535	PTHR47928:SF120|PTHR47928
TRINITY_DN1052_c0_g2_i1	5.795	35.684	51.535	0	19.454	0	32.806	56.208	53.542	6.045	35.943	4.809	4.288	61.683	13.49	4.99	AT2G02955	Q5XVF0		PTHR31576
TRINITY_DN1052_c0_g2_i2	9.974	0	0	11.86	3.021	10.509	9.34	0	0	3.278	4.484	5.143	0	30.94	11.389	11.14	AT2G02955	Q5XVF0		PTHR31576
TRINITY_DN1052_c0_g2_i3	41.586	82.32	23.097	196.644	160.459	56.953	151.52	154.924	73.561	11.116	25.838	33.893	2.701	35.166	45.034	38.798	AT2G02955	Q5XVF0		PTHR31576
TRINITY_DN1052_c0_g2_i4	474.957	353.466	382.05	727.684	607.178	356.538	896.471	663.714	348.261	253.242	301.472	384.748	268.379	278.553	258.432	366.44	AT2G02955	Q5XVF0		PTHR31576
TRINITY_DN1052_c0_g2_i5	10.14	12.55	4.317	6.246	4.369	0	2.744	2.529	2.636	1.318	1.263	7.483	5.632	5.806	3.805	2.632	AT2G02955	Q5XVF0		PTHR31576
TRINITY_DN105305_c0_g1_i1	0	0	0	0	0	0	0	2	0	0	0	0	0	0	0	1	AT5G25120	A0A1B4XBH0	PF00067	PTHR24305:SF157|PTHR24305
TRINITY_DN105309_c0_g2_i1	0	0	0	3	0	0	0	9	0	0	0	0	0	0	1	0		P0C7N6	PF05021	PTHR12710
TRINITY_DN10530_c0_g1_i4	39	70	25	63	79	48	44	42	35	18	19	15	12	30	23	18
TRINITY_DN105315_c0_g1_i1	0	0	0	0	0	0	0	2	0	1	1	0	0	0	0	0		Q2U9E2		PTHR19316:SF18|PTHR19316
TRINITY_DN105315_c0_g1_i2	0	0	0	0	0	0	0	0	1	0	0	1	0	0	0	0		Q2U9E2		PTHR19316:SF18|PTHR19316
TRINITY_DN105316_c0_g1_i2	0	1	1	0	7	0	2	2	0	0	0	0	2	0	0	0		Q96261	PF00257	PTHR33346|PTHR33346:SF5
TRINITY_DN105316_c0_g1_i3	0	0	0	0	0	0	0	3	0	0	0	0	0	0	0	0	AT2G21490	P21298		PTHR33346|PTHR33346:SF5
TRINITY_DN105342_c0_g2_i2	1	5	0	6	4	4	1	4	0	0	0	0	0	0	0	0	AT4G12740	P17802	PF00633|PF10576|PF00730|PF14815	PTHR42944
TRINITY_DN105345_c0_g2_i2	0	3	0	12	0	0	0	0	0	0	0	0	0	0	0	0		P42319	PF01717|PF01717	PTHR43844:SF2|PTHR43844
TRINITY_DN105345_c0_g2_i3	0	0	0	0	0	0	0	2	0	0	0	0	0	0	0	0		P42319	PF01717|PF01717	PTHR43844:SF2|PTHR43844
TRINITY_DN105348_c0_g3_i1	0	0	0	0	0	0	3	9	0	0	3	0	0	0	2	2	AT5G24760	A0A411KUQ9	PF00107|PF08240	PTHR42813|PTHR42813:SF2
TRINITY_DN10534_c0_g1_i1	43.87	30.975	36.561	72.209	87.654	33.513	57.046	33.398	72.705	58.564	82.662	95.558	80	117.762	55.323	44.927	AT2G45770	O80842	PF00448	PTHR43134:SF8|PTHR43134
TRINITY_DN10534_c0_g1_i10	307.579	440.361	285.165	510.559	441.377	286.076	397.847	433.32	150.523	95.251	166.591	177.077	92.895	274.749	180.071	101.55	AT2G45770	O80842	PF02881	PTHR43134:SF8|PTHR43134
TRINITY_DN10534_c0_g1_i14	315.367	536.246	260.04	656.241	554.367	301.273	645.142	516.733	224.141	102.557	252.79	240.218	142.16	165.918	196.523	152.278	AT2G45770	O80842	PF02881|PF00448	PTHR43134:SF8|PTHR43134
TRINITY_DN10534_c0_g2_i14	2.507	35.907	2.088	31.511	4.557	7.639	11.221	5.886	0	0	0	0	0	26.105	0	0	AT2G45770	O80842	PF02881	PTHR43134|PTHR43134:SF8
TRINITY_DN10534_c0_g2_i17	73.141	87.541	101.152	152.301	202.293	68.5	73.345	101.442	21.686	114.627	26.624	76.147	114.945	74.841	8.29	26.245	AT2G45770	O80842	PF02881|PF00448	PTHR43134:SF8|PTHR43134
TRINITY_DN10535_c0_g1_i1	614.089	560.437	340	877.721	793	580.994	853.183	699.556	576	328	373	472	1244.69	831.648	566	1168	AT3G13920	Q40468	PF00270|PF00271	PTHR24031|PTHR24031:SF735
TRINITY_DN105378_c0_g1_i2	0	0	0	4	0	0	1	8	0	0	0	0	0	0	1	0	AT5G08530	P24917	PF10589|PF10531|PF01512	PTHR11780|PTHR11780:SF11
TRINITY_DN10537_c1_g1_i1	8	2	2	4	0	2	85	84	4	2	0	1	0	1	22	92		Q4WCP8	PF12333	PTHR16056:SF2|PTHR16056
TRINITY_DN10537_c2_g1_i7	0	0	0	0	0	0	8	11	0	0	0	0	0	0	0	2
TRINITY_DN105383_c0_g1_i5	0	0	0	0	0	0	1	0	1	0	0	0	0	0	0	6		P38739	PF01822
TRINITY_DN105398_c0_g1_i1	0	0	0	0	0	0	1	1	0	0	0	0	0	0	1	1		Q8CHP5	PF09282	PTHR22959
TRINITY_DN10539_c0_g1_i1	8	29	17	30	51.604	26	18	30	21	14	24	19	8	26.015	7	18	AT5G59210			PTHR48163
TRINITY_DN10539_c0_g2_i3	295.923	443	214	393	494	320	478.001	416	241	210.822	172.668	159.771	210.74	280.327	146.737	270	AT5G59210			PTHR48163
TRINITY_DN10539_c0_g2_i4	23	37	28	46.29	54.396	38	56	50	32	20.178	35.332	21.229	14.26	35.659	23.263	26	AT5G59210			PTHR48163
TRINITY_DN1053_c0_g1_i1	50.207	71	0	1	0	58	0	0	0	16	0	0	0	0	0	0	AT1G29500	Q9C7Q1	PF02519	PTHR31175|PTHR31175:SF71
TRINITY_DN1053_c0_g3_i1	143	146	1	4	1	100	1	0	2	150	9	2	0	0	1	6	AT1G29500	Q9C7Q1	PF02519	PTHR31175:SF32|PTHR31175
TRINITY_DN1053_c0_g5_i1	207.232	170.691	0	0	0	38.013	0	0	0	10	0	0	0	0	1	0	AT1G29500	Q9C7Q1	PF02519	PTHR31175:SF71|PTHR31175
TRINITY_DN1053_c0_g8_i1	93	118	0	0	0	45	0	0	0	6	0	0	0	0	0	0	AT1G29500	Q9C7Q1	PF02519	PTHR31175|PTHR31175:SF71
TRINITY_DN10540_c0_g1_i1	1773.77	1535.71	3415.17	6334.61	4884.9	2206.46	3904.22	5164.51	2545.15	3812.9	2730.01	4038.08	4239.16	3634.42	2235.53	2696.43	AT3G09660	Q9SF37	PF17855|PF00493|PF17207	PTHR11630|PTHR11630:SF47
TRINITY_DN10540_c0_g1_i3	61.851	198.439	409.276	180.177	0	22.007	607.803	1014.02	1588.85	1324.61	1784.18	1582.17	2016.19	1420.78	1253.6	2072.57	AT3G09660	Q9SF37	PF17855|PF00493|PF17207	PTHR11630:SF47|PTHR11630
TRINITY_DN10541_c0_g1_i1	0	0	4.822	0	0	0	0	0	6.208	5.516	1.642	11.613	14.889	11.781	7.013	5.882	AT2G46550			PTHR33868:SF2|PTHR33868
TRINITY_DN10541_c0_g1_i3	16.169	21.306	3.699	11.44	16.423	19.382	1.425	7.245	7.068	1.485	1.451	2.072	1.787	16.91	1.576	5.091	AT2G46550			PTHR33868:SF2|PTHR33868
TRINITY_DN10541_c0_g1_i5	91.832	139.694	66.479	103.56	59.577	49.618	80.575	64.755	0	0	0	0	0	0	0	0	AT2G46550			PTHR33868|PTHR33868:SF8
TRINITY_DN10541_c0_g1_i9	0	0	0	0	0	0	0	0	56.724	38.999	51.907	43.316	69.324	73.309	37.411	64.027	AT2G46550			PTHR33868:SF8|PTHR33868
TRINITY_DN105427_c0_g1_i2	0	0	1	0	0	0	1	4	0	0	0	0	0	0	1	1
TRINITY_DN105427_c0_g2_i2	1	0	0	0	0	0	0	0	1	0	0	1	0	0	0	5
TRINITY_DN105427_c0_g2_i3	0	0	0	0	0	0	6	9	0	0	2	0	0	0	7	0
TRINITY_DN105428_c0_g1_i2	0	0	4	0	4	1	8	5	0	0	0	0	0	0	0	0		P15939	PF02518|PF00512	PTHR43065:SF10|PTHR43065
TRINITY_DN10542_c0_g1_i17	169	247.022	102	204.989	187	156	205	156	115	136.322	122	128	105	175	128	164	AT2G38450			PTHR36792:SF10|PTHR36792
TRINITY_DN10542_c0_g1_i4	127	151.12	149	288	220	176	267.993	256	148	101	119	116	119	146	94	123	AT2G38450			PTHR36792:SF10|PTHR36792
TRINITY_DN10544_c0_g1_i4	1664.5	1256.27	3136.6	2496.61	570.486	1441.29	3014.54	2312.74	2444.53	271.556	408.881	947.413	441.877	3101.88	151.985	214.299	AT1G61800	Q94B38	PF03151	PTHR11132:SF399|PTHR11132
TRINITY_DN10544_c0_g1_i5	430.55	400.055	1362.58	1008.3	202.21	397.258	1756.83	1120.46	3225.97	250.974	548.057	1051.04	584.944	3256.89	157.349	348.208	AT1G61800	Q9M5A9	PF03151	PTHR11132:SF431|PTHR11132
TRINITY_DN10544_c0_g1_i7	899.071	1285.77	2866.17	1469.2	407.697	906.781	2080.21	1793.99	1888.21	272.686	342.455	795.52	323.621	1420.49	120.946	209.395	AT1G61800	Q94B38	PF03151	PTHR11132:SF399|PTHR11132
TRINITY_DN10544_c0_g1_i9	97.229	45.793	55.961	198.643	25.607	120.382	223.275	59.227	132.653	26.784	25.607	38.029	36.906	436.694	5.72	13.098	AT1G61800	Q94B38	PF03151	PTHR11132:SF399|PTHR11132
TRINITY_DN105453_c0_g1_i1	3	5	1	4.373	6	0	5	9	0	0	0	0	0	0	0	0	AT1G03090	P9WPQ3	PF00364|PF00289|PF02786|PF02785	PTHR18866
TRINITY_DN105453_c0_g1_i2	0	0	0	3.627	0	0	0	0	0	0	0	0	0	0	0	0	AT1G03090	O52058	PF00289	PTHR18866
TRINITY_DN10545_c0_g1_i1	0	0	0	12.468	0	0	0	0	0	0	0	0	0	5.073	0	0	AT4G33300	Q9SZA7	PF00931|PF05659	PTHR11017:SF296|PTHR11017
TRINITY_DN10545_c0_g1_i2	123.84	30.651	109.339	243.161	210.397	79.456	249.637	168.197	181.949	80.211	114.887	84.935	108.039	115.887	85.122	209.817	AT4G33300	Q9SZA7	PF00931|PF05659	PTHR11017|PTHR11017:SF296
TRINITY_DN10545_c0_g1_i4	206.986	221.195	166.094	214.714	286.979	138.903	309.677	188.748	156.067	68.517	99.07	131.585	269.345	310.009	92.128	483.897	AT4G33300	Q9SZA7	PF05659|PF00931	PTHR11017|PTHR11017:SF296
TRINITY_DN10545_c0_g1_i5	33.168	36.173	18.889	55.656	32.624	14.641	85.483	61.055	81.984	65.273	26.043	67.555	53.178	90.031	36.75	77.463	AT4G33300	Q9SZA7	PF00931|PF05659	PTHR11017:SF296|PTHR11017
TRINITY_DN10547_c0_g1_i4	97.511	190.001	67.629	78.009	151.584	139.607	94.676	75.775	69	61	36.13	37.118	39	56	50.328	56	AT5G05310		PF03219	PTHR43596
TRINITY_DN10547_c0_g1_i7	30.489	0	2.371	66.991	2.48	6.621	37.324	21.225	0	0	13.87	5.882	0	0	2.672	0	AT5G05310			PTHR43596
TRINITY_DN10549_c1_g1_i3	1	0	0	0	0	0	2	16	5	2	5	0	1	0	9	10	AT2G33040	Q6C338	PF00231	PTHR11693:SF22|PTHR11693
TRINITY_DN1054_c0_g1_i2	225.27	392.918	69.139	84.267	42.321	182.787	70.019	85.466	51.241	95.974	53.598	37.311	13.243	52.905	5.41	27.003	AT2G26300	Q40224	PF00503	PTHR10218:SF333|PTHR10218
TRINITY_DN1054_c0_g1_i3	214.337	427.082	105.861	90.733	53.679	215.993	63.981	79.426	52.759	82.026	55.402	16.689	53.757	56.095	12.59	69.997	AT2G26300	P49082	PF00503	PTHR10218:SF333|PTHR10218
TRINITY_DN1054_c0_g1_i6	31	132	12	20	8	37	60	10	4	6	5	4	1	2	13	325	AT2G26300	Q40224	PF00503	PTHR10218:SF333|PTHR10218
TRINITY_DN105510_c0_g1_i1	0	0	2	0	0	0	3	0	0	0	0	0	0	0	0	0		Q8GGG1	PF06974
TRINITY_DN10551_c0_g1_i1	31.421	67.072	62.663	144.916	101.453	34.731	146.143	96.229	92	82	65.27	54.491	61.627	44.33	49.184	69.976	AT1G73740	A0M527	PF04101|PF03033	PTHR21015:SF22|PTHR21015
TRINITY_DN10551_c0_g1_i4	76.741	69.928	49.337	137.084	135.547	49.269	78.49	133.869	0	0	25.73	25.509	35.373	18.67	28.816	30.024	AT1G73740	A0M527	PF04101|PF03033	PTHR21015:SF22|PTHR21015
TRINITY_DN105521_c0_g1_i3	6	6	14	20	13	7	15	4	10.97	5.034	8	7	5.271	7.087	5.038	4	AT3G24010	Q9LIQ6	PF12998
TRINITY_DN10552_c0_g1_i1	17	448	1	0	2	15	1	1	0	2	0	0	0	0	0	0	AT5G66590	Q41495	PF00188	PTHR10334|PTHR10334:SF385
TRINITY_DN10554_c0_g1_i1	849.553	1224.74	402.269	840.24	627.251	636.452	842.31	606.527	434.402	421.898	372.004	417.493	459.504	311.498	287.024	438.313	AT5G58030	Q54YG5	PF04051	PTHR20902|PTHR20902:SF1
TRINITY_DN10554_c0_g1_i10	32.256	29.774	7.646	16.037	15.497	1.779	10.953	14.631	4.937	3.105	6.678	6.558	4.773	10.742	6.422	4.873	AT5G58030	Q54YG5	PF04051	PTHR20902:SF1|PTHR20902
TRINITY_DN10554_c0_g1_i11	30.194	12.842	20.081	0	23.597	0	54.125	39.368	0	18.953	0	19.773	5.154	32.876	21.398	15.389	AT5G58030	Q54YG5	PF04051	PTHR20902:SF1|PTHR20902
TRINITY_DN10554_c0_g1_i13	50.818	108.023	30.734	66.445	78.315	68.863	87.68	97.903	29.718	6.32	24.771	11.38	11.27	10.919	3.252	2.764	AT5G58030	Q54YG5	PF04051	PTHR20902|PTHR20902:SF1
TRINITY_DN10554_c0_g1_i14	32.875	37.91	0	2.501	1.648	15.973	14.202	0	0	0	0	0	0	8.14	0	7.754	AT5G58030	Q54YG5	PF04051	PTHR20902|PTHR20902:SF1
TRINITY_DN10554_c0_g1_i9	0	40.208	6.29	56.775	34.349	40.73	22.619	31.192	30.374	3.356	21.563	0	8.282	0	3.604	2.963	AT5G58030	Q54YG5	PF04051	PTHR20902:SF1|PTHR20902
TRINITY_DN10554_c0_g2_i8	38.039	0	32.981	0	0	0	57.681	42.383	0	0	0	17.797	2.017	30.824	0	0	AT5G58030	Q54YG5	PF04051	PTHR20902|PTHR20902:SF1
TRINITY_DN10554_c0_g2_i9	0	63.494	0	88.424	27.358	31.589	5.945	0	24.568	10.368	34.568	0	0	0	13.302	17.945	AT5G58030	Q54YG5	PF04051	PTHR20902|PTHR20902:SF1
TRINITY_DN10555_c0_g1_i3	23.709	17.04	19.759	51.777	60.713	6.108	41.701	16.082	30.28	17.203	11.19	9.777	6.334	12.057	10.977	17.743	AT1G69980			PTHR36336
TRINITY_DN10555_c0_g1_i5	378.291	556.519	212.28	375.223	351.913	358.892	402.299	376.919	303.72	613.283	294.148	320.687	329.253	253.308	274.397	348.257	AT1G69980			PTHR36336
TRINITY_DN105581_c0_g1_i1	0	0	0	0	0	0	0	0	0	0	0	0	0	0	0	0	AT2G01670	Q09790	PF00293	PTHR12629:SF0|PTHR12629
TRINITY_DN105582_c0_g1_i1	0	0	0	0	0	0	2	0	0	0	0	0	0	0	0	0		P36528	PF11788	PTHR13124|PTHR13124:SF12
TRINITY_DN105582_c0_g1_i2	0	0	0	0	0	0	0	0	0	0	0	0	0	0	0	0		P36528	PF11788	PTHR13124|PTHR13124:SF12
TRINITY_DN105583_c0_g1_i1	0	0	0	0	0	0	0	1	0	0	0	0	0	0	0	0		O14098
TRINITY_DN1055_c0_g1_i1	3.609	0	0	0	0	0	0	0	0	0	0	0	0	0	2.155	19.974	AT5G13490	P25083	PF00153|PF00153	PTHR45635:SF36|PTHR45635
TRINITY_DN1055_c0_g1_i2	40.391	75.732	13	25	15	16	101	6	24	5	13	8	80	72	45.845	541.026	AT5G13490	P25083	PF00153|PF00153|PF00153	PTHR45635:SF36|PTHR45635
TRINITY_DN1055_c0_g2_i1	2573.89	7188.04	1832.72	3147.57	3045.52	2512.94	3792.7	1969.2	2192.39	2108.87	1534.23	1699.48	3198.65	1752.89	1410.41	2662.84	AT4G28390	O49447	PF00153|PF00153|PF00153	PTHR45635|PTHR45635:SF35
TRINITY_DN1055_c0_g2_i2	61.154	47.572	20.829	84.385	49.052	13.467	41.712	19.227	13.444	15.062	22.351	3.868	4.526	50.818	23.265	10.232	AT4G28390	O49447	PF00153|PF00153	PTHR45635|PTHR45635:SF35
TRINITY_DN1055_c0_g2_i4	3062.94	7653.9	3980.16	6843.41	6535.19	2957.86	6931.74	6409.56	5255.12	4169.25	4002.41	4874.77	8163.83	4766.06	3782.33	5353.93	AT4G28390	O49447	PF00153|PF00153|PF00153	PTHR45635|PTHR45635:SF35
TRINITY_DN10560_c0_g1_i1	208.905	126.543	28.56	299.164	141.92	183.339	106.722	97.103	127.268	123.226	108.242	267.566	161.121	226.757	326.959	510.119	AT1G12970	Q8W4Q3	PF13855|PF13855	PTHR45752|PTHR45752:SF63
TRINITY_DN10560_c0_g1_i3	612.093	502.457	385.44	823.841	710.119	764.831	718.946	475.897	282.732	208.774	175.758	281.434	344.879	339.243	254.041	681.881	AT1G12970	Q8W4Q3	PF13855|PF13855|PF13855	PTHR45752|PTHR45752:SF63
TRINITY_DN10560_c2_g1_i3	256.326	453	128	322.079	265	228	426.973	237	150	182	150	128	308	212	138	245	AT2G34520	P05716	PF00253	PTHR19836:SF30|PTHR19836
TRINITY_DN10562_c0_g1_i11	0	0	0	0	0	0	0	0	1	0	0	0	2	0	0	0	AT3G07700	B9DGY1	PF03109	PTHR10566|PTHR10566:SF113
TRINITY_DN10562_c0_g1_i13	5.553	0	0	0	0	0	0	0	0	1.982	0	0	0	0	0	0	AT3G07700	B9DGY1	PF03109	PTHR10566:SF113|PTHR10566
TRINITY_DN10562_c0_g1_i8	8.447	35	4	4	9	15	0	2	0	2.299	4	2.668	0	1	1	0	AT3G07700	B9DGY1	PF03109	PTHR10566:SF113|PTHR10566
TRINITY_DN10563_c0_g1_i1	232.703	111.672	119.229	249.502	168.143	196.663	141.587	124.539	140.981	301.464	110.004	208.885	364.306	197.957	121.699	324.688	AT3G60340	O59747	PF02089	PTHR11247:SF58|PTHR11247
TRINITY_DN10563_c0_g1_i4	1788.19	2637.11	1745.18	2844.85	2613.28	1982.68	3255.59	2894.96	2093.18	2305.03	1687.4	1691.18	2125.61	1934.69	1623.3	2729.9	AT3G60340	Q20390	PF02089	PTHR11247|PTHR11247:SF58
TRINITY_DN10563_c0_g1_i9	243.858	284.023	223.142	573.486	260.215	322.115	542.015	538.594	456.803	597.189	421.264	403.124	795.827	471.066	481.611	1232.01	AT4G17480	P45479	PF02089	PTHR11247:SF58|PTHR11247
TRINITY_DN105649_c0_g1_i1	0	0	0	0	0	0	0	0	0	0	0	0	0	0	0	0		O74903		PTHR19237:SF20|PTHR19237
TRINITY_DN10564_c0_g1_i3	46.674	34.049	37.049	74.505	64.753	57.265	48.032	44.756	68.09	61.678	43.489	57.678	53.617	73.033	48.138	70.148	AT4G31750	Q8RXV3		PTHR47992|PTHR47992:SF91
TRINITY_DN105654_c0_g1_i1	0	0	0	0	0	0	0	0	0	0	0	0	0	0	0	0		Q6BN19	PF16035	PTHR47284|PTHR47284:SF3
TRINITY_DN10565_c0_g1_i1	15.963	9.115	26.183	62.964	47.086	19.443	59.751	32.191	9.777	6.654	4.808	8.126	18.665	9.757	19.651	11.678	AT1G56420			PTHR34356:SF1|PTHR34356
TRINITY_DN10565_c0_g1_i4	215.036	318.885	213.817	432.203	381.914	227.672	386.226	290.809	298.223	311.346	254.192	287.874	372.335	226.243	238.349	324.322	AT1G56420			PTHR34356:SF1|PTHR34356
TRINITY_DN105676_c0_g1_i1	0	0	0	1	3	0	8	5	0	0	0	1	0	0	0	0
TRINITY_DN10567_c0_g1_i2	107.297	143.849	46.525	50.903	49.144	83.904	32.001	33.741	56.508	21.739	31.796	42.603	12.1	22.26	26.652	20.113		Q9FLX4		PTHR33929|PTHR33929:SF12
TRINITY_DN10567_c0_g1_i5	145.692	144.151	71.475	174.097	152.856	135.096	419	194.28	104.492	98.261	55.204	73.688	73.9	99.74	59.348	75.887	AT5G52870	Q9FLX4		PTHR33929|PTHR33929:SF12
TRINITY_DN10567_c1_g1_i1	12.499	16.93	0	16.795	10.276	28.867	4.076	0	0	0	0	0	1.749	4.623	0	0	AT2G16405	Q6DKP5	PF00400|PF00400	PTHR22838|PTHR22838:SF4
TRINITY_DN10567_c1_g1_i10	0	0	0	0	0	0	0	8.001	0	0	0	0	31.542	0	0	18.627	AT2G16405	Q6DKP5	PF00400	PTHR22838:SF4|PTHR22838
TRINITY_DN10567_c1_g1_i12	10.292	14.101	0	2.413	3.587	0	0	0	0	0	0	0	0	0	0	0	AT2G16405	Q6DKP5	PF00400	PTHR22838|PTHR22838:SF4
TRINITY_DN10567_c1_g1_i13	0	0	0	0	0	0	0	0	11.506	0	0	0	0	0	0	0	AT2G16405	Q6DKP5	PF00400	PTHR22838:SF4|PTHR22838
TRINITY_DN10567_c1_g1_i16	151.08	174.366	0	180.078	134.742	112.776	171.761	109.642	119.05	154.875	116.29	91.712	73.708	78.32	64.658	79.373	AT2G16405	Q6DKP5	PF00400|PF00400	PTHR22838|PTHR22838:SF4
TRINITY_DN10567_c1_g1_i17	20.991	103.6	98.748	71.202	72.452	26.649	49.946	70.732	29.444	25.125	36.71	20.288	0	24.695	15.158	0	AT2G16405	Q6DKP5	PF00400|PF00400	PTHR22838|PTHR22838:SF4
TRINITY_DN10567_c1_g1_i2	26.407	6.378	6.155	26.435	67.963	13.909	28.211	13.983	0	0	0	0	0	3.324	4.184	0	AT2G16405	Q6DKP5	PF00400|PF00400	PTHR22838:SF4|PTHR22838
TRINITY_DN10567_c1_g1_i5	43.734	116.626	80.097	56.078	50.98	98.808	21.204	113.641	0	0	0	0	0	5.037	0	0	AT2G16405	Q6DKP5	PF00400	PTHR22838|PTHR22838:SF4
TRINITY_DN10568_c0_g1_i1	32.743	105.108	8.994	2.224	0	17.207	5	0	0	2.5	0	2.5	0.5	1.5	0.5	5	AT1G38131	Q8GUM0	PF10250	PTHR31288|PTHR31288:SF8
TRINITY_DN10568_c0_g1_i5	11.257	47.892	9.006	8.776	11	6.744	5	11	4	2.5	2	2.5	0.5	1.5	0.5	0	AT1G38131	Q8GUM0	PF10250	PTHR31288:SF8|PTHR31288
TRINITY_DN10568_c0_g1_i8	0	0	0	0	0	5.049	0	0	0	0	0	0	0	0	0	0	AT1G38131	Q8GUM0	PF10250	PTHR31288|PTHR31288:SF8
TRINITY_DN105691_c0_g3_i1	0	0	2	1	0	0	4	2	0	0	2	0	0	0	0	0	AT2G18700	P31688	PF02358	PTHR10788:SF93|PTHR10788
TRINITY_DN10569_c0_g1_i1	102.001	208.707	33.05	56.542	48.337	51.505	58.134	62.858	76.399	57.93	54.369	69.298	149.103	104.931	99.569	94.382	AT1G15215	Q9XI47	PF16719	PTHR33827:SF2|PTHR33827
TRINITY_DN10569_c0_g1_i11	16.034	18.131	9.993	26.07	8.362	8.281	11.327	10.387	14.94	0	2.614	14.366	4.897	7.356	1.35	6.618	AT1G15215	Q9XI47		PTHR33827:SF2|PTHR33827
TRINITY_DN10569_c0_g1_i4	13.966	12.162	1.957	4.388	4.302	5.215	4.539	2.755	5.661	14.07	2.017	2.336	0	11.713	2.08	0	AT1G15215	Q9XI47	PF16719	PTHR33827:SF2|PTHR33827
TRINITY_DN1056_c0_g1_i10	58.526	80.523	21.239	129.445	106.548	89.823	27.767	76.447	0	26.521	10.644	0	10.066	0	0	0	AT5G48545	F4K1R2	PF01230	PTHR47670
TRINITY_DN1056_c0_g1_i18	109.406	150.955	166.792	214.132	162.044	116.474	118.83	172.584	34.439	14.905	49.326	16.837	0	43.316	61.73	37.931	AT5G48545	F4K1R2	PF01230	PTHR47670
TRINITY_DN1056_c0_g1_i20	50.596	99.361	52.247	131.44	164.811	88.837	113.416	124.284	28.498	22.323	37.85	14.795	21.439	35.976	38.252	82.839	AT5G48545	F4K1R2		PTHR47670
TRINITY_DN1056_c0_g1_i22	433.684	557.284	395.852	598.957	473.027	549.015	353.988	369.593	85.063	143.25	146.18	80.367	90.496	198.723	107.018	110.23	AT5G48545	F4K1R2	PF01230	PTHR47670
TRINITY_DN1056_c0_g3_i1	975.183	1295.22	1151.27	1770.62	1617	1120.18	1526.91	1320.16	1121	754	778.092	982	798	1436.06	795.703	996.68	AT4G36650	O23215	PF00382|PF00382	PTHR11618:SF26|PTHR11618
TRINITY_DN10571_c0_g2_i1	303.109	102.878	416.366	582.533	472.058	261.642	562.138	392.084	441.858	454.482	387.478	343.184	258.419	252.293	285.228	414.972	AT1G68940	Q9CAA7	PF00514|PF02985|PF04564	PTHR45958|PTHR45958:SF4
TRINITY_DN10571_c0_g2_i2	18.891	36.122	29.781	68.467	9.162	7.509	96.067	21.03	66.142	63.518	37.522	40.816	31.581	24.707	49.772	53.028	AT1G68940	Q9CAA7	PF02985	PTHR45958:SF4|PTHR45958
TRINITY_DN10571_c0_g2_i4	0	0	0	0	34.755	4.85	0	0	0	0	0	0	0	0	0	0	AT1G68940	Q9CAA7	PF00514|PF02985	PTHR45958:SF4|PTHR45958
TRINITY_DN105725_c0_g1_i2	0	0	0	0	0	0	0	0	2	0	0	0	0	0	0	0	AT3G18830	P07921	PF00083	PTHR48020|PTHR48020:SF7
TRINITY_DN10572_c0_g1_i12	35.898	40.72	37.988	54.04	105.957	47.129	51.308	47.67	27.648	3.305	21.708	22.837	9.129	29.571	9.264	12.759	AT1G26370	F4IE66	PF00271|PF04408	PTHR18934|PTHR18934:SF231
TRINITY_DN10572_c0_g1_i14	235.396	323.989	185.27	423.988	368.259	268.033	385.162	237.333	233.352	210.695	225.292	212.163	172.871	282.429	165.736	227.241	AT1G26370	F4IE66	PF04408|PF00271|PF07717	PTHR18934|PTHR18934:SF231
TRINITY_DN10572_c0_g1_i9	11.851	10.291	10.742	6.925	20.54	6.838	6.53	14.997	0	0	0	0	0	0	0	0	AT1G26370	F4IE66		PTHR18934|PTHR18934|PTHR18934:SF231|PTHR18934:SF231
TRINITY_DN10573_c0_g1_i1	0	0	12.135	11.053	0	1.287	0	0	0	0	0	0	0	0	0	0	AT2G38130	O80438	PF00583	PTHR45896
TRINITY_DN10573_c0_g1_i10	30.128	98.824	25.354	85.467	22.118	52.242	14.281	51.121	0	0	0	26.222	56.413	0	21.089	20.121	AT2G38130	O80438	PF00583	PTHR45896
TRINITY_DN10573_c0_g1_i12	21.446	50.057	36.857	28.06	91.533	22.636	76.296	53.773	42.01	23.974	19.552	0	0	49.91	0	11.967	AT2G38130	O80438	PF00583	PTHR45896
TRINITY_DN10573_c0_g1_i5	11.361	31.337	1.714	16.133	11.398	5.508	23.739	10.694	58.337	54.57	64.207	54.145	86.038	78.804	53.475	35.448	AT2G38130	O80438	PF00583	PTHR45896
TRINITY_DN10573_c0_g1_i7	346.091	496.516	185.942	411.629	447.968	279.165	209.998	311.45	211.368	125.661	171.287	181.087	336.095	225.552	125.303	120.368	AT2G38130	O80438	PF00583	PTHR45896
TRINITY_DN10573_c0_g1_i8	6.007	5.655	6.736	17.995	6.441	9.81	1.241	10.522	3.458	1.238	1.203	2.16	0	0	1.133	0	AT2G38130	O80438		PTHR45896
TRINITY_DN10573_c0_g1_i9	24.942	56.954	16.69	34.734	24.542	9.415	25.603	33.355	8.826	2.557	7.751	16.386	27.453	9.981	0	2.096	AT2G38130	O80438		PTHR45896|PTHR45896
TRINITY_DN105751_c0_g1_i1	0	0	0	0	0	0	0	0	0	0	0	0	0	0	0	0		D4B327	PF00188	PTHR10334
TRINITY_DN105759_c0_g1_i3	0	0	0	0	0	0	1	35	4	2	5	1	0	0	6	4		Q2U5H8	PF07690	PTHR23502|PTHR23502:SF13
TRINITY_DN10575_c0_g1_i1	0	0	0	0	0	0	0	0	0	0	0	0	0	0	0	0	AT3G20260		PF07891	PTHR46702:SF1|PTHR46702
TRINITY_DN10575_c0_g1_i2	0	0	0	0	0	0	0	0	0	0	0	0	0	0	0	0	AT3G20260		PF07891	PTHR46702|PTHR46702:SF1
TRINITY_DN10575_c0_g1_i3	4	18	0	0	0	3	0	1	0	0	4	0	0	1	0	0	AT3G20260		PF07891	PTHR46702:SF1|PTHR46702
TRINITY_DN10575_c0_g1_i4	0	0	1	0	0	0	1	0	0	1	0	3	0	0	1	4	AT3G20260			PTHR46702:SF1|PTHR46702
TRINITY_DN10575_c0_g2_i1	1	8	0	0	0	0	0	0	2	0	0	1	0	0	0	0	AT3G20260
TRINITY_DN105777_c0_g2_i1	0	0	0	0	0	0	0	0	0	0	0	0	0	0	0	0		O13853	PF01504	PTHR23086:SF8|PTHR23086
TRINITY_DN105779_c0_g1_i2	0	0	0	0	0	0	0	0	8	3	5	3	4	2	4	2	AT4G24900	F4JRR5	PF14968	PTHR31198
TRINITY_DN105783_c0_g1_i2	0	0	1	0	0	0	0	3	1	1	0	0	0	0	0	4
TRINITY_DN10578_c0_g1_i15	495.96	554.973	890.655	1506.71	1472.63	810.019	1359.83	969.782	1136.94	825.98	752.118	1055.07	688.396	508.564	694.442	1101.82	AT1G77120	P13603	PF00107	PTHR43880|PTHR43880:SF53
TRINITY_DN10578_c0_g1_i9	733.817	696.027	1076.35	1873.29	1928.28	1017.98	1785.41	1528.31	567.672	457.02	384.882	613.926	380.604	282.436	394.576	616.181	AT1G77120	P06525	PF00107|PF08240	PTHR43880|PTHR43880:SF9
TRINITY_DN10578_c1_g1_i10	4.944	19.7	4	15	24.695	35.024	23.23	15.518	0	0	0	0	14	0	0	0	AT5G66600		PF04784|PF14389	PTHR23054|PTHR23054:SF20
TRINITY_DN10578_c1_g1_i14	20.056	17.759	0	0	8.305	18.765	1.77	6.482	0	0	3.29	0	0	17	0	7.947	AT5G66600		PF14389|PF04784	PTHR23054|PTHR23054:SF20
TRINITY_DN10578_c1_g1_i5	0	0	0	0	0	0	0	0	0	0	0	0	0	0	0	1.354	AT5G66600		PF04784|PF14389	PTHR23054|PTHR23054:SF20
TRINITY_DN10578_c1_g1_i9	0	43.541	0	0	0	6.211	0	0	25	24	17.71	19	0	0	13	20.699	AT5G66600		PF14389|PF04784	PTHR23054:SF20|PTHR23054
TRINITY_DN1057_c0_g1_i3	0	0	0	0	0	17.23	5.641	10.994	42.627	0	0	14.158	4.598	10.8	32.488	21.494	AT4G36790		PF07690	PTHR23505:SF78|PTHR23505
TRINITY_DN1057_c0_g1_i4	5.695	0	0	2.011	1.335	0	2.623	0	24.936	0	4.73	0	7.949	2.236	8.544	36.717	AT4G36790			PTHR23505|PTHR23505:SF78
TRINITY_DN1057_c0_g1_i5	40.707	3.393	45.514	75.791	77.477	41.499	427.313	87.31	104.295	78	65.066	55.388	67.419	92.073	101.837	357.751	AT4G36790		PF07690	PTHR23505|PTHR23505:SF78
TRINITY_DN1057_c0_g1_i6	100.196	73.347	26.504	130.127	51.72	29.286	177.366	42.183	109.906	30	36.112	53.582	47.54	100.891	89.131	120.934	AT4G36790		PF07690	PTHR23505:SF78|PTHR23505
TRINITY_DN1057_c0_g1_i7	0	13.26	0	0	0	0	0	0	30.236	0	0	15.872	39.538	0	0	51.104	AT4G36790		PF07690	PTHR23505:SF78|PTHR23505
TRINITY_DN1057_c0_g1_i8	3.402	0	2.981	5.077	8.468	1.995	19.148	6.516	0	0	0	0	0	0	0	0	AT4G36790		PF07690	PTHR23505|PTHR23505:SF78
TRINITY_DN10581_c0_g1_i2	4	0	0	0	1.391	9.086	5.953	0	8.274	5.957	0	0	0	4	3.673	24.992	AT5G64750	P93007	PF00847	PTHR31190:SF262|PTHR31190
TRINITY_DN10581_c0_g1_i4	0	20.843	0	11.781	0	0	0	9.039	0	0	0	3.381	0	0	0	0	AT5G64750	P93007	PF00847	PTHR31190|PTHR31190:SF262
TRINITY_DN10581_c0_g1_i5	4	28.93	3	1.219	18.609	28.914	77.047	14.961	11.726	3.043	2	4.619	13	7	35.327	403.008	AT5G64750	P93007	PF00847	PTHR31190|PTHR31190:SF262
TRINITY_DN10581_c1_g1_i1	81	54	19	16	58.515	37.05	71	19.394	31	3	5	17	4	30	16	34	AT1G59710		PF04601	PTHR31205:SF42|PTHR31205
TRINITY_DN105823_c0_g2_i1	1	0	1	5	1	0	5	3	0	0	0	0	0	0	0	0		P37049	PF00149	PTHR31302|PTHR31302:SF0
TRINITY_DN10584_c0_g1_i1	9.194	39.888	2.755	0	0	9.088	0	0	5.13	6.323	6.543	12.436	0	3.764	0	1.187	AT2G33730	P93008	PF00270|PF00271	PTHR47958:SF46|PTHR47958
TRINITY_DN10584_c0_g1_i2	638.638	963.525	649.309	1292.66	1025.53	904.142	1118.55	944.344	500.87	579.677	532.457	660.564	600	582.236	482	591.813	AT2G33730	P93008	PF00270|PF00271	PTHR47958|PTHR47958:SF46
TRINITY_DN10584_c0_g1_i4	0	0	0	0	1.473	0	0	0	0	0	0	0	0	0	0	0	AT2G33730	P93008	PF00270|PF00271	PTHR47958|PTHR47958:SF46
TRINITY_DN105873_c0_g1_i2	0	0	0	0	0	0	0	10	0	0	0	0	0	0	1	0				PTHR40465
TRINITY_DN105879_c0_g1_i1	0	0	0	0	0	0	0	0	0	0	0	0	0	0	0	0		I1RAL7		PTHR37278|PTHR37278
TRINITY_DN105879_c0_g1_i4	0	0	0	0	0	0	0	0	0	0	0	0	0	0	0	0		I1RAL7		PTHR37278|PTHR37278
TRINITY_DN10587_c0_g1_i2	739.563	1289.41	504	1061.78	774.001	476	1020	1190.72	911	752	946.808	882.131	1820	1417.84	1237	1166	AT1G74640			PTHR47914
TRINITY_DN105883_c0_g1_i1	0	0	0	0	0	0	2	4	2	0	0	0	0	0	0	5		Q9P7K6	PF01172	PTHR10927:SF2|PTHR10927
TRINITY_DN105883_c2_g1_i1	0	0	0	0	0	0	1	0	0	0	0	0	0	0	2	16		Q9P7K6	PF01172	PTHR10927:SF2|PTHR10927
TRINITY_DN105897_c0_g1_i7	0	0	0	0	0	0	3	1	2	2	2	0	0	0	0	2
TRINITY_DN1058_c0_g5_i1	681	828	342.512	621.032	490	684.399	656.737	544.003	350	586	300	320	343	385.716	269	417	AT3G16760	F1RBN2		PTHR47697
TRINITY_DN10590_c0_g1_i1	13	0	5	6	4	7	33	6	14	1	2	7	5	10	9	30				PTHR34130|PTHR34130:SF5
TRINITY_DN105927_c0_g1_i1	0	0	12	6	0	0	2	7	0	1	0	0	0	0	0	0		O31473	PF09347	PTHR31527
TRINITY_DN105931_c0_g1_i6	0	0	1	0	0	0	0	5	2	0	1	0	0	0	4	15	AT5G19440	G3XMB9	PF01370	PTHR10366|PTHR10366:SF564
TRINITY_DN105932_c0_g1_i1	0	3	1	5	11	3	5	0	0	0	0	0	0	0	0	0	AT3G16910	Q00594	PF00501|PF13193	PTHR43354:SF2|PTHR43354
TRINITY_DN105952_c0_g1_i1	0	0	0	0	0	0	0	0	0	0	0	0	0	0	0	0	AT5G36220	Q078T0	PF00067	PTHR24281|PTHR24281:SF5
TRINITY_DN10596_c0_g2_i2	1220	257.441	5978.06	14995.8	18984.8	2363.22	17476.6	15730.8	11411.6	2911.28	3787.14	8580.88	5596.01	3494.98	4023.01	5022.71	AT3G19990			PTHR37391
TRINITY_DN10596_c0_g2_i3	55.259	138.901	23.216	37.407	34.431	120.956	28.083	35.418	3.009	12.205	0	2	77.51	1.004	2	53.915	AT3G19990			PTHR37391
TRINITY_DN10596_c0_g2_i4	130.741	21.658	628.442	1457.31	1347.05	281.44	1349.45	1257.94	868.29	352.999	343.916	792.997	481.538	332.067	378.375	425.359	AT3G19990			PTHR37391
TRINITY_DN10597_c0_g1_i10	67.499	265.258	18.255	40.461	26.927	48.157	21.666	27	16.671	8.007	4	16.027	0	13.764	5.995	13	AT2G19520	O22607	PF12265|PF00400|PF00400|PF00400|PF00400	PTHR22850:SF202|PTHR22850
TRINITY_DN10597_c0_g1_i11	2.25	0	5.745	0	2.097	5.906	0	0	0	0	0	0	0	0	4.005	0	AT2G19520	O22607	PF00400|PF00400|PF00400	PTHR22850:SF202|PTHR22850
TRINITY_DN10597_c0_g1_i3	0	4.027	0	0	0	0	0	0	0	0	0	0	0	0	0	0	AT2G19520
TRINITY_DN10597_c0_g1_i5	0	0	0	0	0	0	0	0	1.362	0	0	0	7	0	0	0	AT2G19520	O22607	PF00400|PF00400|PF00400|PF00400	PTHR22850:SF202|PTHR22850
TRINITY_DN10597_c0_g1_i6	0	6.793	0	0	0	0	0	0	0	0	0	0	0	0	0	0	AT4G29730	Q9SU78	PF00400|PF00400	PTHR22850:SF202|PTHR22850
TRINITY_DN10599_c0_g1_i2	560.044	1287.49	689	856.417	787	625.003	522.071	753.6	585	696	520.001	534	687	424	309.103	376	AT1G15000	Q9M9Q6	PF00450	PTHR11802|PTHR11802:SF355
TRINITY_DN1059_c0_g1_i1	7.866	7.597	0	8.009	0	0	40.364	0	0	0	7	4	3.025	8	11.332	453.571	AT1G01490	O03982	PF00403	PTHR45811|PTHR45811:SF32
TRINITY_DN1059_c0_g1_i2	0	0	2	0	0	8.35	17.166	4.292	3.448	0	0	0	0	0	4.668	0	AT1G01490	O03982	PF00403	PTHR45811:SF32|PTHR45811
TRINITY_DN1059_c0_g1_i3	2.134	0	1	0	9.859	15.65	0	6.708	1.552	19	0	0	0	0	0	48.393	AT1G01490	O03982	PF00403	PTHR45811:SF32|PTHR45811
TRINITY_DN1059_c0_g1_i5	0	5.403	0	3.991	13.141	0	32.47	0	0	0	0	0	2.975	0	0	165.036	AT1G01490	O03982	PF00403	PTHR45811|PTHR45811:SF32
TRINITY_DN1059_c1_g1_i1	0	0	18.555	11.409	0	0	11.517	9.228	0	0	1.188	0	0	0	2	2.307	AT5G24510	P49148	PF00428	PTHR45696
TRINITY_DN1059_c1_g1_i4	4	1	29.445	16.591	6	0	11.483	30.772	0	0	7.812	13	0	0	0	4.693		Q96UQ7	PF00428	PTHR21141:SF85|PTHR21141
TRINITY_DN1059_c1_g2_i1	0	0	0	0	0	0	0	0	0	0	0	0	0	0	0	0	AT2G27710	Q9C3Z5	PF00428	PTHR21141
TRINITY_DN1059_c1_g3_i1	0	0	3	4	0	0	0	1	0	1	1	0	0	0	0	2	AT5G24510	P49148	PF00428	PTHR45696
TRINITY_DN1059_c3_g1_i1	0	0	3	0	0	0	3	14	4	1	10	1	0	0	4	9	AT3G09200	Q9C3Z6	PF00428	PTHR45699|PTHR45699:SF3
TRINITY_DN10600_c0_g1_i1	0	0	0	0	13.876	0	0	0	0	0	0	0	0	0	1.826	0	AT3G02540	Q84L31	PF00240|PF00627	PTHR10621|PTHR10621:SF55
TRINITY_DN10600_c0_g1_i10	0	0	0	0	0	0	0	0	14.695	3.638	7.105	3.411	18.269	11.829	0	0	AT5G38470	Q84L31	PF09280|PF00627	PTHR10621:SF46|PTHR10621
TRINITY_DN10600_c0_g1_i16	35.086	0	0	63.202	46.87	74.818	68.502	24.487	0	0	0	0	17.606	57.744	0	0	AT3G02540	Q84L31	PF00627|PF00240	PTHR10621:SF55|PTHR10621
TRINITY_DN10600_c0_g1_i17	27.68	72.481	25.031	55.248	63.296	43.143	47.173	104.646	43.609	8.867	31.666	50.928	16.524	32.452	31.551	12.269	AT3G02540	Q84L31	PF00240|PF00627	PTHR10621|PTHR10621:SF55
TRINITY_DN10600_c0_g1_i18	64.761	50.62	39.416	126.42	0	46.068	106.864	61.451	103.232	28.188	60.487	21.128	0	87.711	44.548	37.664	AT3G02540	Q84L31	PF00240|PF09280|PF00627	PTHR10621|PTHR10621:SF55
TRINITY_DN10600_c0_g1_i22	1010.3	1429.41	1280.4	2210.3	1626.99	1183.76	1694.98	1637.24	1406.82	966.934	1134.25	1103.17	1126.84	978.37	872.718	1170.2	AT3G02540	Q84L31	PF09280|PF00627|PF00627	PTHR10621:SF46|PTHR10621
TRINITY_DN10600_c0_g1_i4	0	0	0	0	101.186	0	0	0	0	0	0	0	0	0	0	0	AT3G02540	Q84L31	PF09280|PF00240|PF00627	PTHR10621|PTHR10621:SF55
TRINITY_DN10600_c0_g1_i6	533.691	783.7	646.449	1012.93	816.957	668.74	764.316	717.153	657.258	438.57	466.153	616.376	575.527	411.238	428.284	428.432	AT3G02540	Q84L31	PF00627|PF00240	PTHR10621:SF55|PTHR10621
TRINITY_DN10600_c0_g1_i8	540.366	517.355	564.22	981.298	662.835	664.968	714.231	782.924	777.439	674.805	558.338	697.986	565.233	415.822	637.194	739.44	AT3G02540	Q84L31	PF00240|PF00627|PF00627|PF09280	PTHR10621:SF55|PTHR10621
TRINITY_DN10600_c1_g1_i1	0	0	0	0	0	0	5	0	1	3	3	0	0	0	1	0	AT5G27870	Q3E8Z8	PF04043|PF01095	PTHR31707|PTHR31707:SF289
TRINITY_DN10601_c0_g1_i1	113.228	101.738	0	10.186	8.815	63.982	127.536	0	29.258	32.734	5.586	0	0	0	108.505	90.043	AT1G28260	Q9FZ99	PF10374|PF10373	PTHR15696:SF27|PTHR15696:SF27|PTHR15696:SF27|PTHR15696:SF27|PTHR15696|PTHR15696|PTHR15696|PTHR15696
TRINITY_DN10601_c0_g1_i3	373.056	141.177	167.825	223.865	144.434	278.417	140.721	97.8	180.081	86.862	93.235	128.347	74.35	111.932	96.313	185.4	AT1G28260	Q9FZ99	PF10373|PF10374	PTHR15696:SF27|PTHR15696:SF27|PTHR15696:SF27|PTHR15696|PTHR15696:SF27|PTHR15696|PTHR15696|PTHR15696
TRINITY_DN10601_c0_g1_i5	182.433	127.007	125.623	238.468	139.778	191.952	246.052	216.942	198.661	153.231	122.179	169.653	299.65	193.068	197.183	500.558	AT1G28260	Q9FZ99	PF10374|PF10373	PTHR15696:SF27|PTHR15696:SF27|PTHR15696:SF27|PTHR15696:SF27|PTHR15696|PTHR15696|PTHR15696|PTHR15696
TRINITY_DN106023_c0_g1_i1	0	1	0	0	0	0	2	2	0	0	2	1	0	0	1	0
TRINITY_DN10602_c0_g1_i3	230.47	494.104	337.055	603.53	561.854	240.78	458.668	543.906	284.517	293.447	453.027	549.084	600.354	505.683	211.231	201.525	AT3G29185		PF12204	PTHR33404|PTHR33404:SF3
TRINITY_DN10602_c0_g1_i4	2.679	84.805	3.451	23.638	24.894	8.98	23.372	8.658	13.629	12.559	15.997	44.316	7.102	50.729	3.92	14.208	AT3G29185		PF12204	PTHR33404|PTHR33404:SF3
TRINITY_DN10602_c0_g1_i5	69.257	136.45	95.617	123.134	111.179	54.656	105.636	109.398	63.771	60.994	73.872	101.896	128.345	122.216	54.849	25.832	AT3G29185		PF12204	PTHR33404:SF3|PTHR33404
TRINITY_DN10602_c0_g1_i9	13.818	29.64	12.156	6.693	16.074	6.584	13.333	43.195	7.082	0	7.104	3.703	6.323	4.372	0	4.435	AT3G29185
TRINITY_DN10603_c0_g1_i1	20.201	38.294	13.191	29.189	61.106	30.489	36.962	32.369	27.383	23.858	24.043	36.29	61.402	39.963	25.816	44.96	AT4G02485	Q5UR03	PF13532	PTHR13069|PTHR13069:SF32
TRINITY_DN10603_c0_g1_i3	50.607	22.647	26.746	41.837	40.69	25.824	66.691	58.958	37.456	29.239	13.458	8.628	12.27	27.611	20.835	24.821	AT4G02485	Q9UT12	PF13532	PTHR13069:SF32|PTHR13069
TRINITY_DN10603_c0_g1_i5	9.765	4.302	7.93	14.85	12.139	0	16.269	5.511	2.161	5.903	7.499	1.081	3.328	3.425	4.348	2.219	AT4G02485			PTHR13069:SF32|PTHR13069
TRINITY_DN10603_c0_g1_i8	56.427	70.222	47.133	91.294	61.065	70.687	133.079	74.162	0	0	0	0	0	0	0	0	AT4G02485	Q5UR03	PF13532	PTHR13069:SF32|PTHR13069
TRINITY_DN106040_c0_g1_i1	0	0	0	0	0	0	0	0	0	0	0	0	0	0	0	0		Q3M6C3		PTHR43622:SF3|PTHR43622
TRINITY_DN106065_c0_g1_i1	1	0	0	1	0	1	2	0	1	0	2	6	2	6	1	2
TRINITY_DN10606_c0_g1_i1	112.84	46.393	96.195	210.764	106.721	116.491	424.456	228.567	119.116	136.909	43.34	161.739	134.892	212.529	97.966	240.658	AT4G35270	Q7X9B9	PF02042|PF00564	PTHR32002|PTHR32002:SF44
TRINITY_DN10606_c0_g1_i11	108.908	135.832	198.506	299.722	306.587	181.339	0	254.325	225.688	74.294	180.16	118.801	79.873	0	184.774	182.871	AT4G35270	Q7X9B9	PF00564|PF02042	PTHR32002:SF44|PTHR32002
TRINITY_DN10606_c0_g1_i12	0	0	0	0	0	0	0	0	0	0	0	0	0	0	0	0	AT1G76350	Q9SFW8		PTHR32002|PTHR32002:SF44
TRINITY_DN10606_c0_g1_i15	0	0	0	0	0	0	0	0	5.565	0	18.582	5.475	0	0	52.599	28.273	AT4G35270	Q7X9B9	PF02042|PF00564	PTHR32002|PTHR32002:SF44
TRINITY_DN10606_c0_g1_i16	241.129	219.272	177.118	471.673	344.207	188.244	273.479	252.498	246.426	89.709	185.321	125.945	189.717	214.951	131.208	177.2	AT1G76350	Q9SFW8		PTHR32002|PTHR32002:SF44
TRINITY_DN10606_c0_g1_i2	80.838	61.884	404.224	350.549	311.23	142.41	561.539	318.908	328.14	195.687	384.314	140.721	0	193.726	207.336	403.703	AT1G20640	Q9SFW8	PF00564|PF02042	PTHR32002:SF44|PTHR32002
TRINITY_DN10606_c0_g1_i3	0	0	0	0	0	0	0	0	0	0	0	0	0	7.837	0	0	AT4G35270	Q7X9B9	PF02042|PF00564	PTHR32002|PTHR32002:SF44
TRINITY_DN10606_c0_g1_i5	678.337	487.116	1158.32	1953.56	1254.78	724.895	1557.93	1598.77	877.434	773.611	989.365	790.335	479.283	722.322	716.457	828.097	AT1G20640	Q9LE38	PF02042|PF00564	PTHR32002|PTHR32002:SF44
TRINITY_DN10606_c0_g1_i6	86.252	34.775	0	0	0	0	263.008	0	0	115.904	0	143.682	122.973	156.634	0	0	AT4G35270	Q7X9B9	PF00564|PF02042	PTHR32002|PTHR32002:SF44
TRINITY_DN10606_c0_g1_i8	0	0	179.756	292.569	268.693	79.218	170.554	271.857	214.431	0	165.918	0	0	0	182.759	361.198	AT4G35270	Q7X9B9	PF02042|PF00564	PTHR32002|PTHR32002:SF44
TRINITY_DN10607_c0_g1_i1	11654.6	28146.8	18139	28241.3	27354	22257.6	18173.1	30715.9	17287.9	39453.5	27588.9	23031.4	28537.8	20248.7	20322.1	18941.8	AT1G06680	Q9SLQ8	PF01789	PTHR31407:SF6|PTHR31407
TRINITY_DN10607_c0_g1_i2	86.057	161.787	201.522	260.377	316.019	216.312	112.632	175.339	126.598	169.377	164.989	69.791	56.018	75.88	53.278	117.908	AT1G06680	Q9SLQ8	PF01789	PTHR31407|PTHR31407:SF42
TRINITY_DN10609_c0_g1_i1	716.385	1259.57	661.473	1115.14	933.087	662.557	817.375	754.807	635.061	701.847	791.613	682.409	601.134	816.322	457.276	553.503	AT3G04340	F4J3N2	PF00004|PF01434	PTHR23076|PTHR23076:SF58
TRINITY_DN10609_c0_g1_i2	0	37.141	13.918	41.604	19.62	13.985	14.892	28.116	20.578	5.022	31.197	12.07	17.846	16.257	20.29	37.686	AT3G04340	F4J3N2		PTHR23076|PTHR23076:SF58
TRINITY_DN10609_c0_g1_i6	57.884	15.184	21.847	16.244	8.294	32.575	51.756	27.078	3.361	9.131	10.19	11.521	10.021	30.42	14.434	22.811	AT3G04340	F4J3N2	PF01434|PF00004	PTHR23076|PTHR23076:SF58
TRINITY_DN1060_c0_g1_i1	67.774	19.359	0	95.943	164.187	38.445	267.035	80.143	0	0	21.199	0	14.531	33.65	20.533	0	AT4G21065	A8MQA3	PF01535|PF01535|PF01535|PF01535|PF01535|PF01535|PF13041|PF14432	PTHR47926:SF70|PTHR47926
TRINITY_DN1060_c0_g1_i2	173.226	320.644	161	247.057	200.983	222.555	303.971	163.857	143	100	113.801	99	129.469	154.35	62.467	137	AT4G21065	A8MQA3	PF13041|PF13041|PF14432|PF01535|PF01535|PF01535|PF01535	PTHR47926:SF70|PTHR47926
TRINITY_DN1060_c0_g2_i1	48.576	147.078	0	27.757	26.734	43.991	43.463	36.742	6.477	10.627	2.514	2.328	2.826	2.925	10.599	10.883	AT5G05010	Q93Y22	PF00928|PF01217	PTHR10121|PTHR10121:SF5
TRINITY_DN1060_c0_g2_i5	772.708	1036.64	348.991	644.608	499.127	674.133	669.731	442.728	355.666	587.169	290.833	311.121	545.963	382.494	250.019	472.936	AT5G05010	Q93Y22	PF01217|PF00928	PTHR10121:SF5|PTHR10121
TRINITY_DN1060_c0_g2_i6	809.833	1589.62	611.18	1069.06	891.714	945.792	851.463	872.094	547.959	772.132	502.557	623.315	635.899	544.745	455.19	608.302	AT5G05010	Q93Y22	PF00928	PTHR10121:SF5|PTHR10121
TRINITY_DN1060_c0_g2_i7	58.425	75.339	17.034	45.579	48.021	48.084	98.268	14.436	14.898	13.13	26.096	26.236	37.312	28.836	48.192	10.879	AT5G05010	Q93Y22	PF00928	PTHR10121:SF5|PTHR10121
TRINITY_DN106102_c0_g1_i1	1	0	2	1	0	0	15	1	2	2	0	1	0	0	0	7		D4AZK9		PTHR31018:SF8|PTHR31018
TRINITY_DN106110_c0_g2_i1	0	2	0	0	1	0	0	4	0	0	0	0	0	0	0	0	AT2G41530	P29904	PF00072|PF00196	PTHR43214:SF3|PTHR43214
TRINITY_DN10612_c0_g1_i1	111.975	25	69	90.99	16.344	481.034	117.57	30	87.597	327.511	33.722	37.182	131	156.161	40.709	176	AT2G18800	Q38910	PF00722|PF06955	PTHR31062|PTHR31062:SF153
TRINITY_DN10612_c0_g1_i3	0	0	0	15.01	6.865	19.901	0	0	0	6.588	2.278	2.818	0	0	0	0	AT2G18800	Q38910	PF06955|PF00722	PTHR31062|PTHR31062:SF153
TRINITY_DN10612_c0_g1_i4	11.025	0	0	0	5.791	39.065	12.43	0	16.403	13.901	0	0	0	5.839	2.291	0	AT2G18800	P24806	PF00722	PTHR31062|PTHR31062:SF153
TRINITY_DN106131_c0_g1_i5	0	4	4	0	0	1	0	0	0	2	0	1	0	0	0	0	AT1G61100	O80386		PTHR31008:SF0|PTHR31008
TRINITY_DN106131_c0_g2_i3	0	2.556	0	2	1	0	0	2	0	0	0	0	0	0	0	0	AT1G61100	O80386		PTHR31008|PTHR31008:SF0
TRINITY_DN106131_c0_g2_i6	2	2.444	0	0	0	0	0	0	0	0	0	0	0	0	0	0	AT1G61100	O80386		PTHR31008:SF0|PTHR31008
TRINITY_DN10614_c0_g1_i2	0	0	2.229	0	0	0	0	4.002	0	0	0	0	0	0	0	0	AT5G16690	Q6E7H0	PF07034	PTHR12748|PTHR12748:SF0
TRINITY_DN10614_c0_g1_i6	25.552	40.23	13.015	30.337	29.11	6.717	54.926	19.342	1.503	2.108	5.411	6.071	4.686	1.529	2.608	5.64	AT5G16690	Q6E7H0	PF18137|PF07034	PTHR12748|PTHR12748:SF0
TRINITY_DN10614_c0_g1_i7	0	0	0	17.073	0	0	0	0	0	0	3.792	0	0	0	0	0	AT5G16690	Q6E7H0	PF18137|PF07034	PTHR12748|PTHR12748:SF0
TRINITY_DN10614_c0_g2_i10	0	0	0	0	17.77	0	0	0	0	0	0	0	0	0	0	0	AT5G16690	Q6E7H0	PF18137|PF07034	PTHR12748:SF0|PTHR12748
TRINITY_DN10614_c0_g2_i12	0	0	0	0	0	2.394	0	0	17.237	0	16.797	9.818	0	0	8.729	8.837	AT5G16690	Q6E7H0	PF07034|PF18137	PTHR12748:SF0|PTHR12748
TRINITY_DN10614_c0_g2_i14	5.499	10.778	0	12.59	0	11.889	25.584	18.656	22.259	6.892	0	9.869	1.314	0	0	10.523	AT5G16690	Q6E7H0	PF18137|PF07034	PTHR12748|PTHR12748:SF0
TRINITY_DN10614_c0_g2_i5	4.949	4.992	7.756	0	0	0	11.49	0	0	0	0	2.241	0	5.471	5.663	0	AT5G16690	Q6E7H0	PF07034	PTHR12748|PTHR12748:SF0
TRINITY_DN10614_c0_g2_i9	0	0	0	0	4.12	0	0	0	0	0	0	0	0	0	0	0	AT5G16690	Q6E7H0	PF07034	PTHR12748:SF0|PTHR12748
TRINITY_DN106164_c0_g1_i1	0	0	0	0	0	0	0	0	0	0	0	0	0	0	0	0				PTHR16301:SF4|PTHR16301
TRINITY_DN106169_c0_g1_i1	0	0	0	2	0	0	6	5	0	0	0	0	0	0	1	0
TRINITY_DN10617_c0_g1_i2	167.564	16.046	354.483	702.964	866.561	194.766	1589.53	645.344	157.7	23.49	106.918	54.386	209.136	191.726	833.244	1127.78	AT1G78780	P16273		PTHR31723|PTHR31723:SF8
TRINITY_DN10617_c0_g1_i4	271.839	326.494	234.658	364.75	288.927	266.622	278.382	339.265	267.361	214.102	154.912	176.245	227.679	217.054	140.38	269.638	AT1G21370	P87055		PTHR28110
TRINITY_DN10617_c0_g1_i5	203.436	221.123	100.09	166.036	153.438	201.234	271.18	138.317	102.3	127.51	66.082	61.614	125.864	111.274	88.756	194.22	AT1G21370	P87055		PTHR28110
TRINITY_DN10617_c0_g1_i6	13.161	25.507	13.342	78.25	51.073	9.378	19.618	22.735	69.639	39.9	83.088	41.755	36.321	44.349	57.605	59.362	AT1G21370	P87055		PTHR28110
TRINITY_DN106188_c0_g1_i2	216	317	171	291	224.002	183	207	186	140.239	113.528	176.065	192.724	168.293	130.582	217.539	151.221	AT5G03340	Q9LZF6	PF02359|PF02933	PTHR23077|PTHR23077:SF169
TRINITY_DN10618_c0_g1_i12	72.869	51.569	8.004	21.231	9.497	86.588	82.049	13.005	109.551	52.891	233.271	149.239	82.591	76.472	342.322	517.678	AT1G71697	Q9M9H6		PTHR22603|PTHR22603:SF81
TRINITY_DN10618_c0_g1_i15	37.845	24.483	2.817	0	0	1.483	16.064	5.304	16.481	0	0	16.104	0	6.733	36.536	23.883	AT1G71697	Q9M9H6	PF01633	PTHR22603:SF81|PTHR22603
TRINITY_DN10618_c0_g1_i16	39.81	50.631	4.996	7.765	3.503	33.383	35.303	7.988	20.338	8.221	27.723	21.976	10.74	10.008	37.218	55.556	AT1G71697	Q9M9H6		PTHR22603:SF85|PTHR22603
TRINITY_DN10618_c0_g1_i2	153.379	130.489	13.932	43.186	28.84	167.665	82.431	22.293	64.962	20.856	59.526	44.295	15.869	35.324	81.952	173.954	AT1G71697	Q9M9H6	PF01633	PTHR22603|PTHR22603:SF81
TRINITY_DN10618_c0_g1_i26	389.191	459.88	63.251	104.817	67.16	523.991	450.153	70.41	586.668	207.032	1003.48	688.411	385.8	345.463	1517.97	1730.93	AT1G71697	Q9M9H6	PF01633	PTHR22603|PTHR22603:SF81
TRINITY_DN10619_c0_g2_i1	8.604	216.524	6.072	20.709	46.525	40.82	12.266	21.42	21.58	47.591	2.716	67.558	4.515	5.688	16.546	26.996	ATCG01310	Q2L944	PF00181|PF03947	PTHR13691:SF51|PTHR13691
TRINITY_DN10619_c0_g2_i10	0	1.332	1.025	0	0	0	0	0	0	79.556	6.549	582.763	4.087	5.614	2.335	1.888	ATCG00740	Q2L938	PF01193|PF01000|PF03118	PTHR32108
TRINITY_DN10619_c0_g2_i11	643.815	1889.42	2421.64	5597.45	2791.33	1503.18	2927.17	4149.77	1199.73	2440.26	989.819	9031.48	2241.47	1208.07	971.322	1425.19	ATCG00680	A4QKV7	PF00421	PTHR33180:SF14|PTHR33180
TRINITY_DN10619_c2_g1_i2	17	13	2	3	5	2	12	7	0	0	0	0	0	0	0	0	ATMG01110	P92543	PF05919	PTHR34456
TRINITY_DN1061_c0_g1_i1	0	0	0	0	0	0	0	0	0	19.369	0	0	0	0	0	0	AT1G04350	P93824	PF03171|PF14226	PTHR10209|PTHR10209:SF546
TRINITY_DN1061_c0_g1_i10	0	0	0	0	0	0	0	0	30.697	0	7.534	20.074	0	0	0	11.101	AT1G03400	Q94A78	PF03171|PF14226	PTHR10209:SF546|PTHR10209
TRINITY_DN1061_c0_g1_i11	0	0	0	0	0	0	0	0	0	0	0	0	0	0	0	0	AT1G06620	Q84MB3	PF14226|PF03171	PTHR10209|PTHR10209:SF546
TRINITY_DN1061_c0_g1_i3	0	0	0	0	0	0	36.361	0	0	0	0	0	0	0	4.235	0	AT1G04350	P93824	PF14226|PF03171	PTHR10209|PTHR10209:SF546
TRINITY_DN1061_c0_g1_i5	0	0	0	0	0	0	0	2.32	180.322	49.727	12.549	80.165	44.293	39.228	20.197	224.762	AT1G03400	Q94A78	PF14226|PF03171	PTHR10209|PTHR10209:SF546
TRINITY_DN1061_c0_g1_i6	0	0	0	0	0	0	0	0	35.949	27.043	0	0	0	0	6.436	35.261	AT1G03400	Q94A78	PF14226|PF03171	PTHR10209:SF546|PTHR10209
TRINITY_DN1061_c0_g1_i7	8.259	0	0	0	0	0	39.613	4.976	36.19	0	2.242	16.199	12.421	18.694	14.093	78.642	AT1G04350	P93824	PF03171|PF14226	PTHR10209:SF546|PTHR10209
TRINITY_DN1061_c0_g1_i8	194.151	83.846	307.693	643.959	402.64	38.72	818.449	725.719	60.124	11.301	67.538	211.939	324.559	542.733	112.222	77.805	AT1G03400	Q94A78	PF14226|PF03171	PTHR10209:SF546|PTHR10209
TRINITY_DN1061_c0_g1_i9	0	0	0	0	0	0	0	4.796	0	0	0	3.511	1.813	6.202	0	0	AT1G04350	P93824	PF14226|PF03171	PTHR10209:SF546|PTHR10209
TRINITY_DN1061_c0_g2_i1	0	0	0	0	0	0	0	0	0	0	0	0	0	0	0	0	AT1G06620	Q84MB3	PF14226|PF03171	PTHR10209:SF546|PTHR10209
TRINITY_DN1061_c0_g2_i10	0	0	7.147	0	1.788	0	0	0	33.392	0	0	6.421	14.797	14.688	0	30.793	AT1G04350	P93824	PF14226|PF03171	PTHR10209:SF546|PTHR10209
TRINITY_DN1061_c0_g2_i2	187.965	122.589	575.32	733.087	616.004	56.108	910.801	958.887	434.19	116.118	164.188	487.66	408.018	704.317	287.229	498.209	AT1G03400	Q94A78	PF03171|PF14226	PTHR10209|PTHR10209:SF546
TRINITY_DN1061_c0_g2_i3	5.558	3	8	7	5	5	202.904	29.013	97.367	22.185	0	9.23	24.995	23.579	25.399	142.155	AT1G04350	P93824	PF03171|PF14226	PTHR10209:SF546|PTHR10209
TRINITY_DN1061_c0_g2_i4	0	1	0	0	0	0	3.176	0	2.349	8.257	0	3.8	0	12.005	4.785	7.527	AT1G04350	P93824	PF14226|PF03171	PTHR10209:SF546|PTHR10209
TRINITY_DN1061_c0_g2_i5	10.328	6.607	36.839	85.269	56.568	3.632	108.69	64.733	0	0	0	0	15.105	11.553	5.405	6.745	AT1G03400	Q94A78	PF03171|PF14226	PTHR10209|PTHR10209:SF546
TRINITY_DN1061_c0_g2_i9	0	0	0	23.685	0	0	307.847	174.961	0	0	0	0	0	0	0	0	AT1G03400	P93824	PF03171|PF14226	PTHR10209|PTHR10209:SF546
TRINITY_DN10620_c0_g1_i1	9.887	4.244	6.46	13.513	4.541	16.039	12.098	22.186	2.12	0	1.987	0	0	4.787	0	2.171	AT4G38500	Q9FZ97	PF04765	PTHR12956:SF22|PTHR12956
TRINITY_DN10620_c0_g1_i2	19.574	37.779	20.903	60.798	20.858	34.872	26.037	34.118	26.361	26.258	21.306	7.646	12.813	11.259	8.214	16.214	AT4G38500	Q9FZ97	PF04765	PTHR12956|PTHR12956:SF22
TRINITY_DN10620_c0_g1_i7	350.528	508.977	202.637	391.689	246.508	359.088	234.866	359.698	237.518	345.742	207.707	166.354	182.187	172.954	131.786	183.634	AT4G38500	Q9FZ97	PF04765	PTHR12956|PTHR12956:SF22
TRINITY_DN10621_c0_g2_i1	19.755	8.591	35.797	111.526	61.6	5.317	87.421	115.151	0	0	0	0	0	0	0	0	AT1G65790	O81906	PF07714|PF08276|PF01453|PF00954	PTHR27002:SF829|PTHR27002
TRINITY_DN10621_c0_g2_i2	134.267	222.409	169.203	267.622	387.416	124.683	354.883	333.849	27	1	13	15	9	26	11	14	AT1G65790	Q39086	PF07714|PF00954|PF08276|PF11883|PF01453	PTHR27002:SF829|PTHR27002
TRINITY_DN106236_c0_g1_i1	0	0	0	0	0	0	0	0	0	0	2	0	1	1	0	2	AT5G35180
TRINITY_DN10623_c0_g1_i2	78	159	6	11	2	149	3	1	2	51	0	0	0	2	3	0	AT3G44220	Q9SRN0	PF03168	PTHR31415:SF121|PTHR31415
TRINITY_DN10624_c0_g1_i10	0	0	5.594	0	19.438	0	0	1.504	13.541	10.983	0	20.063	0	22.035	7.01	14.313	AT4G11160	Q2RMS0	PF00009|PF11987	PTHR43381:SF5|PTHR43381
TRINITY_DN10624_c0_g1_i2	297	363.338	239.01	574.028	459.063	294.001	597.004	398.165	208.459	154.017	144.561	152.937	247.844	223.305	146.99	227.687	AT4G11160	A4XL70	PF11987|PF00009	PTHR43381:SF5|PTHR43381
TRINITY_DN10624_c0_g1_i7	0	1.602	1.396	0	6.499	0	0	4.47	0	0	15.439	0	20.156	7.66	0	0	AT4G11160	Q5FQM3	PF00009|PF11987	PTHR43381|PTHR43381:SF5
TRINITY_DN10625_c0_g1_i10	139.295	248.847	67.795	252.917	175.982	191.402	220.752	159.301	135.772	126.715	125.067	147.591	170.264	201.919	120.719	180.902	AT5G13240	O14109	PF09174	PTHR22504|PTHR22504:SF0
TRINITY_DN10625_c0_g1_i17	152.034	204.425	151.691	313.848	200.088	135.381	251.55	246.617	311.146	154.853	185.75	401.802	181.214	388.284	342.914	417.765	AT5G13240	O14109	PF09174	PTHR22504|PTHR22504:SF0
TRINITY_DN10625_c0_g1_i19	30.25	61.619	23.704	0	0	68.785	25.984	89.907	0	22.422	12.508	0	25.07	38.629	0	0	AT5G13240	Q54Y76		PTHR22504|PTHR22504:SF0
TRINITY_DN10625_c0_g1_i2	47.624	43.811	3.714	29.681	9.445	113.133	14.65	14.893	10.272	0	1.92	18.603	0	4.53	4.242	19.863	AT5G13240	O14109	PF09174	PTHR22504:SF0|PTHR22504
TRINITY_DN10625_c0_g1_i8	78.768	40.751	25.268	126.094	73.51	23.754	91.402	15.532	36.046	9.937	27.336	53.351	26.029	44.28	32.238	46.86	AT5G13240	Q7ZWL6	PF09174	PTHR22504
TRINITY_DN10626_c0_g1_i1	75.896	397.054	42	5.416	27	159.243	2	29	0	68	5	3	10	0	0	0	AT5G26910		PF14383|PF14309	PTHR21726|PTHR21726:SF57
TRINITY_DN10626_c0_g1_i2	269.158	694	106	138.488	95	241	35	92	48.948	161	65	39	44	27.747	19	8	AT5G26910		PF14309|PF14383	PTHR21726:SF57|PTHR21726
TRINITY_DN10626_c0_g1_i3	68.116	0	0	37.096	0	0	0	0	1.052	0	0	0	0	2.253	0	0	AT5G26910		PF14309|PF14383	PTHR21726|PTHR21726:SF57
TRINITY_DN10627_c0_g1_i2	0	0	0	0	0	0	0	0	0	0	0	2	0	0	0	0	AT1G27880	Q0WVW7	PF00270|PF00271	PTHR13710|PTHR13710:SF108
TRINITY_DN10627_c0_g1_i4	2	75.263	3	0	4	2	4	4	2	2	0	0	0	1	1	0	AT1G27880	Q0WVW7	PF00270|PF00271	PTHR13710|PTHR13710:SF108
TRINITY_DN10627_c0_g1_i6	0	34.737	0	0	0	0	0	0	0	0	0	0	0	0	0	0	AT1G27880	Q0WVW7	PF00270|PF00271	PTHR13710|PTHR13710:SF108
TRINITY_DN1062_c0_g1_i15	19.473	89.585	0	2.205	1.054	26.712	3.242	1.104	2.177	2.164	2.186	0	3.115	0	0	0	AT5G24310	Q9M3A3		PTHR10460:SF46|PTHR10460
TRINITY_DN1062_c0_g1_i16	291.527	753.415	179.999	340.795	311.946	243.288	508.873	296.896	183.823	236.836	149.814	212	394.885	308	174	257	AT5G24310	Q9M3A3		PTHR10460|PTHR10460:SF46
TRINITY_DN1062_c0_g2_i1	96.62	53.81	55.102	97.935	54.955	68.279	46.677	69.37	25.159	45.097	26.559	17.982	5.218	22.622	23.662	17.879	AT5G24310	Q6NMC6		PTHR10460|PTHR10460:SF10
TRINITY_DN1062_c0_g2_i5	198.018	138.19	152.898	252.065	149.045	287.715	135.323	180.63	168.841	150.903	129.441	132.018	63.782	68.378	91.347	106.121	AT3G49290	Q9M3A3		PTHR10460|PTHR10460:SF46
TRINITY_DN106305_c0_g1_i1	0	0	0	0	0	0	0	0	0	0	0	0	0	0	0	0	AT5G18210	Q49117	PF13561	PTHR48107|PTHR48107:SF7
TRINITY_DN106311_c0_g2_i1	0	0	0	0	0	0	0	0	0	0	0	0	0	0	0	0		Q28IN9	PF06658	PTHR13507:SF0|PTHR13507
TRINITY_DN10631_c0_g1_i1	126	232.001	113	160	193	98	152	227	275	257	215	218	358	198	248	254	AT2G40240	Q9S733	PF01535|PF01535|PF13041|PF12854	PTHR47932|PTHR47932:SF8
TRINITY_DN10632_c0_g1_i1	279.508	355.006	274.012	453.697	457.255	236.652	464.126	430	304	192	260	250	333	287	233	294	AT5G06430	P73920	PF00085	PTHR43601|PTHR43601:SF11
TRINITY_DN106349_c0_g1_i2	1.81	8.059	0	0	3	1	1	0	2	0	0	1	1	3	1	0
TRINITY_DN10634_c0_g1_i1	6	11	1	2	0	12	0	1	3	4	2	5	10	15	1	16	AT5G41380	Q9FHH8	PF06203	PTHR31319|PTHR31319:SF46
TRINITY_DN10634_c0_g2_i2	0	1.57	0	1.386	11	4	8	9.956	0	2	2	3	7	14	12.726	7.233	AT5G41380	Q9SK53	PF06203	PTHR31319|PTHR31319:SF46
TRINITY_DN10634_c0_g2_i3	9	3.43	5	4.614	0	0	0	3.044	15	1	0	0	0	0	4.274	4.767	AT5G41380	Q9FHH8	PF06203	PTHR31319:SF46|PTHR31319
TRINITY_DN10636_c0_g1_i4	834.349	287	2675.82	5973.78	5026.85	3211.02	4603.21	5267.17	2061	1664.82	995	1555.57	1207	882.614	965	1913.73	AT5G54470	Q9LRM4	PF00643	PTHR31717|PTHR31717:SF60
TRINITY_DN10636_c0_g1_i5	16.117	4.323	11.049	44.902	48.633	22.212	6.049	53.496	33.632	6.038	0	10.433	0	0	0	6.274	AT5G54470	Q9LRM4	PF00643	PTHR31717|PTHR31717:SF60
TRINITY_DN10637_c0_g1_i1	6.359	1.158	0	4.299	3.318	8.719	0	1.026	0	4.792	3.005	0	0	3.832	4.092	0	AT1G32190	Q5ZJX1		PTHR12277|PTHR12277:SF139
TRINITY_DN10637_c0_g1_i10	23.17	71.681	5.16	5.011	4.582	21.364	32.336	27.54	13.01	17.696	16.149	35.169	62.63	11.711	35.733	26.688	AT3G56840	Q9LES4	PF01266	PTHR43104
TRINITY_DN10637_c0_g1_i11	69.985	70.428	25.113	60.64	31.37	62.324	32.305	33.44	16.259	62.166	14.817	15.608	5.045	14.433	6.871	24.312	AT1G32190	Q7ZVZ7	PF12146	PTHR12277|PTHR12277:SF139
TRINITY_DN10637_c0_g1_i12	70.334	102.539	56.727	88.05	110.729	60.497	54.36	33.993	50.73	8.193	39.919	29.223	41.326	87.024	7.303	0	AT3G56840	Q5ZJX1		PTHR12277:SF139|PTHR12277
TRINITY_DN10637_c0_g1_i6	7.152	2.195	0	0	0	10.097	0	0	0	10.153	1.11	0	0	0	0	0	AT1G32190	Q5ZJX1		PTHR12277|PTHR12277:SF139
TRINITY_DN106389_c0_g1_i1	0	0	0	7	0	1	1	1	0	0	0	0	0	0	0	0	AT4G38890	P41504	PF01207	PTHR11082:SF25|PTHR11082
TRINITY_DN10638_c0_g1_i13	0	0	0	0	0	0	0	10.852	7	0	0	0.5	0	0	0	3.5	AT5G19440	G3XMB9	PF01370	PTHR10366|PTHR10366:SF564
TRINITY_DN10638_c0_g1_i3	0	0	3	0	0	0	0	13.148	0	0	4	0.5	0	0	3	3.5	AT5G19440	G3XMB9	PF01370	PTHR10366|PTHR10366:SF564
TRINITY_DN10639_c0_g1_i1	21.148	10	2	24.131	8.006	19	7.011	6	10.023	3.017	1	7.021	1	4	7.02	5.028	AT2G39260	F4IUX6		PTHR12839|PTHR12839:SF8
TRINITY_DN1063_c0_g1_i1	299.15	466	242	526	517	269.993	476.002	382	323	298	353	251	213	324	212	275	AT1G11760	Q84VW5		PTHR35989|PTHR35989:SF1
TRINITY_DN10640_c0_g1_i1	0	5.554	0	17.279	14.163	10.103	2.398	0	5.183	0	6.044	3.935	0	3.921	0	0	AT5G11900	Q2TVZ2	PF01253	PTHR12789|PTHR12789:SF1
TRINITY_DN10640_c0_g1_i12	214.07	353.169	180.354	371.428	302.102	161.893	433.461	339.423	198.827	116.02	182.214	138.49	97.062	99.677	129.528	156.036	AT5G11900	Q2TVZ2	PF01253	PTHR12789:SF3|PTHR12789
TRINITY_DN10640_c0_g1_i2	504.407	803.361	287.367	698.127	655.555	448.192	677.728	647.445	294.59	237.483	295.454	282.274	333.692	304.821	228.159	404.425	AT5G11900	O42929	PF01253	PTHR12789|PTHR12789:SF3
TRINITY_DN10640_c0_g1_i4	17.523	25.916	6.279	33.166	16.296	29.812	13.206	27.132	10.401	8.497	12.288	5.3	7.246	1.581	3.314	5.539	AT5G11900	A5DGV3		PTHR12789:SF1|PTHR12789
TRINITY_DN10641_c0_g1_i2	0	0	0	2	2	0	0	0	0	0	0	0	10.287	7.826	0	0	AT4G10250	Q38806	PF00011	PTHR11527|PTHR11527:SF267
TRINITY_DN10641_c0_g1_i6	0	0	0	0	0	6	0	0	0	0	0	0	2.004	1.606	0	0	AT4G10250	Q38806	PF00011	PTHR11527|PTHR11527:SF267
TRINITY_DN10641_c0_g1_i7	0	0	0	0	0	0	0	0	0	0	0	0	23.709	20.568	0	0	AT4G10250	Q38806	PF00011	PTHR11527|PTHR11527:SF267
TRINITY_DN10644_c0_g1_i3	5.853	14.568	20.208	19.813	23.946	17.94	11.994	6.563	5.793	2.031	7.026	1.894	0	1.326	1.527	1.493	AT1G11880		PF04188	PTHR12468:SF4|PTHR12468
TRINITY_DN10644_c0_g1_i4	58.147	47.796	35.017	50.189	61.125	32.056	37.006	35.431	18.207	11.969	13.974	8.657	9.259	6.674	7.473	6.507	AT1G11880		PF04188	PTHR12468|PTHR12468:SF4
TRINITY_DN10646_c0_g1_i3	2	5	1	2	3	10	0	1	0	0	0	0	1	0	0	1				PTHR33463|PTHR33463:SF104
TRINITY_DN10647_c0_g1_i10	518.421	516.414	295.224	696.999	594.117	455.844	520.822	439.51	118.77	75.515	80.64	107.105	126.585	114.333	96.839	76.828	AT2G30800	F4INY4	PF04408|PF07717|PF00271|PF00270|PF01424	PTHR18934|PTHR18934:SF227|PTHR18934:SF227|PTHR18934
TRINITY_DN10647_c0_g1_i11	2.171	0	2.092	3.065	2.175	1.025	2.013	5.294	1.021	0	0	1.139	0	0	0	0	AT2G30800	F4INY4		PTHR18934|PTHR18934:SF227
TRINITY_DN10647_c0_g1_i12	22.791	150.9	46.107	46.88	97.683	48.369	58.808	48.392	13.511	14.77	5.508	4.6	5.441	26.389	21.915	82.04	AT2G30800	F4INY4	PF07717|PF00271|PF04408	PTHR18934|PTHR18934:SF226
TRINITY_DN10647_c0_g1_i14	150.073	209.752	171.74	345.803	265.679	211.51	296.403	265.804	164.698	107.512	148.852	90.155	53.213	168.494	113.246	186.133	AT2G30800	F4INY4	PF00271|PF07717|PF04408	PTHR18934|PTHR18934:SF226
TRINITY_DN10647_c0_g1_i2	2.704	8.758	0	15.532	15.392	14.512	18.015	0	0	15.203	0	0	28.761	4.783	0	0	AT2G30800	F4INY4	PF07717|PF04408|PF00271	PTHR18934:SF226|PTHR18934
TRINITY_DN106498_c0_g2_i1	0	0	0	0	0	0	1	0	0	0	0	0	0	0	0	2			PF10022	PTHR35339|PTHR35339:SF4
TRINITY_DN10649_c0_g1_i4	107	87	1619	2387.01	632.004	214.397	737.962	996.584	2035	767	1971.02	1466	134	225	676	395	AT1G09530	O80536	PF00010	PTHR46807|PTHR46807:SF3
TRINITY_DN1064_c1_g1_i2	63	146	71	103	117.899	57	81	118	55	42	58	65.275	88	105	41	50	AT2G21195			PTHR48204
TRINITY_DN10651_c0_g1_i1	318.247	940.462	248.503	564.523	581.078	286.473	724.053	440.392	409.807	283.061	325.36	364.143	445.674	359.765	333.585	465.91	AT5G04600	Q6GL69	PF00076	PTHR46754|PTHR46754:SF9
TRINITY_DN10651_c0_g1_i11	204.432	228.313	160.196	280.189	209.49	244.131	288.134	197.218	106.392	67.425	73.369	118.026	92.278	126.706	96.478	158.257	AT3G02070	Q9SGA5	PF02338	PTHR12419:SF3|PTHR12419
TRINITY_DN10651_c0_g1_i12	53.321	38.895	33.019	49.637	27.468	48.971	68.366	40.265	71.618	49.364	50.804	51.586	48.588	59.33	45.601	95.156	AT3G02070	Q9SGA5	PF02338	PTHR12419:SF3|PTHR12419
TRINITY_DN10651_c0_g1_i14	69.437	39.058	29.373	109.43	24.832	113.206	73.739	16.529	55.917	62.137	50.809	59.577	65.089	83.884	52.525	119.577	AT3G02070	Q9SGA5	PF02338	PTHR12419:SF3|PTHR12419
TRINITY_DN10651_c0_g1_i3	34.913	69.24	26.909	33.221	66.447	44.837	73.719	44.602	13.267	9.013	13.658	6.667	25.372	7.315	9.81	7.1	AT3G02070	Q9SGA5	PF02338	PTHR12419:SF3|PTHR12419
TRINITY_DN10655_c0_g1_i1	533.043	81.485	35.261	0	0	920.516	0	0	0	665.284	16	0	0	0	0	0	AT1G79620	Q8GZ99	PF07714|PF08263	PTHR48006:SF1|PTHR48006
TRINITY_DN10655_c0_g1_i3	121.57	3.378	0	2	0	74.452	0	0	0	4.106	0	0	0	0	1	0	AT1G79620	Q8GZ99	PF07714|PF08263	PTHR48006:SF1|PTHR48006
TRINITY_DN10655_c0_g1_i5	502.701	136.886	8.739	0	0	884.223	0	0	0	383.277	0	0	0	0	0	0	AT1G79620	Q8GZ99	PF07714|PF08263	PTHR48006:SF1|PTHR48006
TRINITY_DN10655_c0_g1_i6	100.393	0	0	0	0	102.295	2	1	1	61.803	0	4	1	0	1	0	AT1G79620	Q8GZ99	PF08263|PF07714	PTHR48006:SF1|PTHR48006
[truncated: 62,221 more rows]

## Sheet: S7
Table S7. Read count (before normalization) of unigenes in bud of S. curtisii
Unigene	Read count C1-TP-A	Read count C1-TP-B	Read count C1-TP-C	Read count C1-TP-D	Read count C1-TP-E	Read count C1-TP-F	Read count C1-TP-G	Read count C2-TP-A	Read count C2-TP-B	Read count C2-TP-C	Read count C2-TP-D	Read count C2-TP-E	Read count C2-TP-F	Read count C2-TP-G	Read count C2-TP-H	TAIR_ID	UniProt_ID	Pfam_ID	PANTHER_ID
TRINITY_DN0_c0_g1_i10	899.672	946.424	967.154	821.334	836.137	676.72	627.841	1053.31	951.316	956.64	645.553	675.348	1000.62	815.297	502.823	AT5G57740	Q6KAE5	PF12796|PF12796|PF12796	PTHR24128|PTHR24128:SF63
TRINITY_DN0_c0_g1_i12	144.87	157.446	153.44	92.555	163.576	168.564	135.81	205.745	179.827	193.235	174.864	148.16	188.241	179.167	107.363	AT5G57740	Q6NLQ8	PF00023|PF12796|PF12796	PTHR24128:SF63|PTHR24128
TRINITY_DN0_c0_g1_i2	425.463	325.148	539.406	395.121	728.562	873.237	534.663	676.419	383.526	366.176	396.582	332.827	730.144	758.536	423.631	AT5G57740	Q6KAE5	PF12796|PF12796|PF12796	PTHR24128|PTHR24128:SF63
TRINITY_DN10000_c0_g1_i1	0	11.171	2.162	4.14	29.912	0	5.324	11.374	6.26	2.216	5.646	16.167	9.579	27.53	9.47	AT1G75670	O43036		PTHR12709:SF5|PTHR12709
TRINITY_DN10000_c0_g1_i4	65	70.435	113.57	121.86	138.458	106	140.079	81.626	104.72	75.784	115.347	146.017	189.695	217.009	171.02	AT1G75670	O43036		PTHR12709:SF5|PTHR12709
TRINITY_DN10000_c0_g1_i5	0	12.394	8.268	0	3.629	0	1.596	0	9.02	0	3.007	1.815	9.726	11.461	1.511	AT1G75670	O43036		PTHR12709|PTHR12709:SF5
TRINITY_DN100031_c0_g1_i1	0	0	0	0	0	0	0	1	0	0	0	0	0	0	0
TRINITY_DN10003_c0_g1_i1	137	168.001	94	96	124	72	107	25	69	40	69	105	26.742	42	12	AT2G23690		PF14009	PTHR33052|PTHR33052:SF128
TRINITY_DN10003_c0_g2_i1	2	17	0	2	28	7	45	1	16	5	0	47.98	10	44	10	AT2G23690		PF14009	PTHR33052|PTHR33052:SF128
TRINITY_DN100046_c0_g2_i1	0	0	0	0	5	0	1	0	0	0	0	5	0	0	8	AT2G39060	Q9FPN0	PF03083	PTHR10791:SF134|PTHR10791
TRINITY_DN10004_c0_g1_i5	575.092	291.005	646.552	873	384.979	368	350	893.622	601	569	675	277	404	425	489.12	AT1G29820		PF01544	PTHR46950|PTHR46950:SF2
TRINITY_DN10005_c0_g1_i10	698.446	371.604	725.021	798.424	267.24	243.995	509.994	1104.2	577.432	620.354	718.868	333.037	372.262	515.949	280	AT2G03890	Q9SI52	PF00454	PTHR45800:SF12|PTHR45800
TRINITY_DN10005_c0_g1_i11	289.54	243.333	252.998	312.566	107.76	65.005	150.006	337.086	203.794	247.651	240.132	140.963	149.738	169.084	88	AT5G15730	Q9LFV3	PF07714	PTHR47989:SF43|PTHR47989
TRINITY_DN100063_c0_g4_i3	0	0	0	0	0	0	0	8	0	7	4	0	0	0	0	AT5G23900	O59931	PF01294	PTHR11722|PTHR11722:SF0
TRINITY_DN100067_c0_g1_i1	0	3	3	5	2	1	0	1	4	3	4	5	5	3	1		Q2W4T8	PF00015|PF17200|PF00672	PTHR32089|PTHR32089:SF92
TRINITY_DN10006_c0_g1_i1	0	0	0	0	1.784	12.391	0	28.917	6.676	0	0	0	13.185	14.127	9.729	AT3G57300	Q8RXS6	PF00176|PF13892	PTHR45685|PTHR45685:SF2
TRINITY_DN10006_c0_g1_i4	59.54	0	0	64.413	29.592	145.041	14.404	99.335	0	22.577	49.744	13.563	52.748	55.167	32.868	AT3G57300	Q8RXS6	PF00271|PF00176|PF13892	PTHR45685:SF2|PTHR45685
TRINITY_DN10006_c0_g1_i5	0	8.802	3.804	2.103	6.612	6.924	10.214	3.652	7.037	1.916	5.757	6.36	1.356	4.656	11.542	AT3G57300	Q8RXS6	PF13892|PF00176	PTHR45685:SF2|PTHR45685
TRINITY_DN10006_c0_g1_i6	1243.64	966.662	1147.77	1343.54	1201.02	1561.47	965.331	1715.31	1260.29	1144.56	1325.7	967.077	1731.4	1686.03	1182.71	AT3G57300	Q8RXS6	PF13892|PF00271|PF00176	PTHR45685|PTHR45685:SF2
TRINITY_DN100077_c0_g1_i1	51	18	19	37	0	0	0	4	0	2	0	0	1	0	0	AT2G26830	P54352	PF01633	PTHR22603:SF76|PTHR22603
TRINITY_DN100088_c0_g1_i2	4	0	8	0	0	0	2	1	4	2	0	3	4	4	5		P52685	PF03466|PF00126	PTHR30579|PTHR30579:SF3
TRINITY_DN10008_c0_g1_i1	106	93	111	134	138	94	153	171	113	114	105.401	113	140	138	181	AT2G44020	Q9ZT96	PF02536	PTHR13068|PTHR13068:SF24
TRINITY_DN100093_c0_g1_i1	0	0	0	0	0	0	0	3	0	0	0	0	0	0	0	AT1G20630
TRINITY_DN1000_c0_g1_i1	110	124	67	44	345	145	385	64	77	55	62	100	157	137	119	AT5G15770	Q9LFU9	PF00583	PTHR13355:SF11|PTHR13355
TRINITY_DN1000_c0_g2_i1	22	16	16	28	25	12	35	22	27	10	21	21	26	30	17	AT5G15770	Q9LFU9	PF00583	PTHR13355|PTHR13355:SF11
TRINITY_DN100109_c0_g1_i1	0	0	3	6	0	0	0	8	2	0	4	0	0	0	0	AT3G57870	P40984	PF00179	PTHR24067:SF248|PTHR24067
TRINITY_DN10010_c0_g1_i1	29.783	48.635	29.516	43.464	49.03	36.12	47.027	95.234	37.88	0	6.185	36.324	45.228	29.703	16.511			PF04819	PTHR47830|PTHR47830:SF2
TRINITY_DN10010_c0_g1_i7	48.218	100.364	81.484	45.536	111.97	93.88	67.973	84.766	93.12	73	85.815	56.676	118.772	101.297	104.489	AT2G33385	F4IVU1	PF04045	PTHR12058|PTHR12058:SF1
TRINITY_DN100111_c0_g1_i1	1	1	0	0	0	19	6	0	1	6	0	1	0	0	3	AT3G06240	Q8GXC7	PF00646|PF07734	PTHR31790:SF166|PTHR31790
TRINITY_DN100131_c0_g1_i1	17	4	13	55	0	0	0	3	0	0	0	0	0	0	0	AT1G07030	O14281	PF00153|PF00153|PF00153	PTHR45758:SF4|PTHR45758
TRINITY_DN100144_c0_g1_i2	3	2	3	0	0	0	0	48	0	14	0	2	0	0	0	AT2G45140	O60119	PF00635	PTHR10809:SF6|PTHR10809
TRINITY_DN100148_c0_g2_i1	0	0	0	0	0	0	0	11	0	3	3	0	0	0	0	AT1G12520	Q6BZU2	PF00080|PF00403	PTHR10003:SF89|PTHR10003
TRINITY_DN100148_c0_g2_i2	0	0	4	3	0	0	0	0	0	0	0	0	0	0	0	AT1G12520	Q6BZU2	PF00080|PF00403	PTHR10003:SF89|PTHR10003
TRINITY_DN10016_c0_g1_i1	44.63	40.387	92.575	23.266	35.852	34.276	29.557	18.668	41.654	76.658	35.735	33.4	74.584	108.525	34.646	AT3G12210
TRINITY_DN10016_c0_g1_i2	230.282	170.748	285.38	378.734	300.523	301.431	175.699	365.705	263.25	304.299	247.258	279.061	436.829	407.76	234.973	AT3G12210			PTHR21521
TRINITY_DN10016_c0_g1_i4	11.088	5.31	12.045	0	12.625	7.777	16.745	11.638	14.096	24.043	10.006	20.539	61.587	43.715	21.38	AT3G12210			PTHR21521
TRINITY_DN100177_c0_g1_i10	0	1.484	8.02	21.671	11.104	3.084	0	1.549	4.394	12.184	12.505	12.658	26.853	0	21.019	AT5G21430	Q84VQ4		PTHR47726
TRINITY_DN100177_c0_g1_i3	20.01	11.516	29.527	32.938	8.896	4.339	14.586	37.245	21.606	22.258	32.26	32.394	31.875	8	38.981	AT5G21430	Q84VQ4		PTHR47726
TRINITY_DN100177_c0_g1_i4	14.049	0	1.453	6.391	0	19.577	0	12.206	0	4.611	16.351	4.948	5.273	0	0	AT5G21430	Q84VQ4		PTHR47726
TRINITY_DN100180_c0_g1_i1	0	3	1	13	0	0	0	1	0	0	0	0	0	0	0				PTHR28285:SF1|PTHR28285
TRINITY_DN10019_c0_g1_i5	0	3	1	2	1	0	0	381	112	176	272	69	68	67	18		Q4R6I1	PF17921|PF13456|PF00665	PTHR46387:SF6|PTHR46387
TRINITY_DN10019_c1_g1_i1	17.078	13.884	17.919	15.461	32.068	10.842	11.471	24.913	18.293	25.335	13.705	10.213	31.759	15.396	9.536	AT4G22300	Q8GYK2	PF02230	PTHR10655:SF62|PTHR10655
TRINITY_DN10019_c1_g1_i2	49.609	55.315	111.601	86.591	133.734	64.914	35.399	0	0	0	16.104	10.019	0	0	2.489	AT4G22300	Q8GYK2	PF02230|PF02230	PTHR10655|PTHR10655:SF62|PTHR10655|PTHR10655:SF62
TRINITY_DN10019_c1_g1_i4	30.167	38.434	62.683	71.411	36.468	22	14	56.364	37.3	46.541	53.758	29.087	64.84	69.126	45
TRINITY_DN10019_c1_g1_i9	127.994	108.367	101.798	127.542	147.726	123.244	164.131	176.769	125.391	149.124	138.696	133.681	202.792	261.478	165.976	AT4G22300	Q8GYK2	PF02230	PTHR10655:SF62|PTHR10655
TRINITY_DN10019_c1_g2_i1	488.566	588.505	502.82	463.189	899.792	728.875	774.859	519.228	556.642	527.499	467.769	939.07	1056.85	872.397	843.705	AT4G22300	Q8GYK2	PF02230	PTHR10655|PTHR10655:SF62
TRINITY_DN10019_c1_g2_i2	57.694	98.495	65.18	93.811	65.752	79.05	82.935	55.772	33.424	41.54	49.231	59.931	64.154	74.603	58.765	AT4G22300	Q8GYK2	PF02230	PTHR10655:SF62|PTHR10655
TRINITY_DN10019_c1_g3_i1	66.343	98.356	45.411	36.78	173.289	217.005	142.641	84.956	87.627	47.823	45.601	96.734	179.61	117.157	94.608	AT4G31540	A0A396JG59	PF03081	PTHR12542:SF145|PTHR12542
TRINITY_DN10019_c1_g3_i2	577.465	447.158	619.478	731.22	458.014	657.995	344.359	741.073	423.373	535.177	468.399	223.266	241.897	410.938	262.391	AT4G31540	A0A396JG59	PF03081	PTHR12542|PTHR12542:SF147
TRINITY_DN1001_c0_g1_i1	27.615	29.586	0	0	2.619	0	3.209	180.64	249.558	182.532	347.82	250.096	328.311	248.027	68.325	AT5G66840	Q338N2	PF02037	PTHR35323|PTHR35323:SF2
TRINITY_DN1001_c0_g1_i12	181.872	107.885	105.016	143.758	149.517	68.736	99.378	442.122	354.67	321.155	247.101	176.174	394.904	543.283	234.927	AT5G66840	Q338N2	PF02037	PTHR35323|PTHR35323:SF2
TRINITY_DN1001_c0_g1_i2	247.983	76.704	239.337	300.012	220.633	145.537	369.637	1074.83	598.298	693.611	669.323	371.296	581.036	845.046	557.674	AT5G66840	Q338N2	PF02037	PTHR35323|PTHR35323:SF2
TRINITY_DN1001_c0_g1_i4	83.925	25.357	74.48	120.565	62.109	9.556	13.216	0	0	0	0	0	0	0	0	AT5G66840	Q338N2		PTHR35323|PTHR35323:SF2
TRINITY_DN1001_c0_g1_i8	306.677	292.642	313.451	357.3	194.124	246.769	250.626	48.845	0	14.174	71.194	10.156	58.255	0	11.107	AT5G66840	Q338N2		PTHR35323|PTHR35323:SF2
TRINITY_DN1001_c0_g1_i9	0	0	0	0	0	0	0	305.564	101.027	113.135	154.312	93.32	143.556	151.83	83.578	AT5G66840	Q338N2		PTHR35323|PTHR35323:SF2
TRINITY_DN100206_c0_g1_i1	0	0	5	6	0	1	0	0	0	1	0	0	0	0	0		Q7SGY6	PF05328	PTHR13337
TRINITY_DN10020_c0_g1_i1	0	0	0	2.554	0	0	2	4.043	0	0	1.169	0	0	0	6.945	AT2G36690	Q6Z244	PF14226	PTHR10209|PTHR10209:SF460
TRINITY_DN10020_c0_g1_i3	11	0	2	11.446	3	0	1	15.957	5	12	33.831	9	2	14	27.055	AT2G36690	Q6Z244	PF03171|PF14226	PTHR10209:SF460|PTHR10209
TRINITY_DN10020_c0_g1_i4	0	0	0	0	0	2	0	0	0	0	0	0	0	0	0	AT2G36690	Q6Z244	PF14226|PF03171	PTHR10209:SF460|PTHR10209
TRINITY_DN100214_c0_g1_i1	7	11	69	51	0	0	0	58	0	42	6	12	0	0	0	AT2G41840	P25443	PF03719|PF00333	PTHR13718:SF103|PTHR13718
TRINITY_DN10021_c0_g1_i3	376	358	534	409.361	533	262	243	1284	714	709.624	514	517	830.998	1126	363	AT3G14130	Q9LJH5	PF01070	PTHR10578:SF116|PTHR10578
TRINITY_DN10023_c0_g1_i1	1421.32	742.569	1687.17	1843.92	884.308	626.789	773.153	1914.96	930.555	1065.15	1212.29	607.325	698.561	1051.61	503.401	AT5G15270	P58223	PF00013|PF00013|PF00013|PF00013	PTHR10288|PTHR10288:SF274
TRINITY_DN10023_c0_g1_i15	1047.35	660.441	1364.96	1374.82	1061.56	962.894	885.599	1778.72	976.082	1232.51	1341.41	766.587	997.537	1428.3	949.454	AT5G15270	P58223	PF00013|PF00013|PF00013|PF00013	PTHR10288|PTHR10288:SF274
TRINITY_DN10023_c0_g1_i17	198.034	125.531	304.156	180.263	89.936	66.896	118.723	251.833	172.372	196.101	310.242	123.822	201.126	277.678	65.168	AT5G15270	P58223	PF00013|PF00013|PF00013|PF00013	PTHR10288:SF274|PTHR10288
TRINITY_DN100259_c0_g1_i1	97	86	82.795	119	0	0	0	5	0	6	0	4	0	0	0		Q5ANE3	PF01284	PTHR28165|PTHR28165:SF1
TRINITY_DN100259_c0_g1_i2	0	0	32.205	0	0	0	0	0	0	0	0	0	0	0	0		Q12207	PF01284	PTHR28165|PTHR28165:SF1
TRINITY_DN10025_c0_g1_i5	95.857	60.098	126.29	67.413	78.588	61.536	46.756	96.543	44.182	54.183	98.006	55.901	72.346	67.685	35.174
TRINITY_DN10026_c0_g1_i2	284.704	359.865	331.937	386.324	890.168	463.384	318.763	452.575	317.91	238.938	229.171	491.337	571.012	553.44	413.49	AT3G19540		PF04788	PTHR31300:SF31|PTHR31300
TRINITY_DN10026_c0_g1_i3	0	2.601	27.583	2.669	51.817	271.842	86.741	0	0	59.827	0	0	25.968	7.576	16.93	AT3G19540		PF04788	PTHR31300:SF31|PTHR31300
TRINITY_DN10026_c0_g1_i6	104.113	66.779	143.9	88	328.454	196.877	416.519	230.743	108.021	173.939	155.154	283.335	208.525	374.542	576.454	AT3G19540		PF04788	PTHR31300:SF31|PTHR31300
TRINITY_DN10026_c0_g1_i7	26.183	35.943	18.788	0	14.772	31.889	40.977	24.681	20.997	30.948	53.675	44.327	46.566	57.952	48.31	AT3G19540		PF04788	PTHR31300|PTHR31300:SF31
TRINITY_DN10027_c0_g2_i1	0	0	0	0	1.699	0	0	0	0	0	0	0	0	0	0		O04974	PF14244
TRINITY_DN10027_c0_g2_i3	0	6	8	0	0	0	0	0	0	0	0	2.163	0	0	0
TRINITY_DN10027_c0_g2_i5	0	0	0	6	2.301	2	0	4	4	12	2	7.837	7	15	0		O04974	PF14223	PTHR34222:SF43|PTHR34222
TRINITY_DN100288_c0_g1_i3	0	0	1	2	0	0	0	15	4	5	4	0	0	0	1
TRINITY_DN10028_c2_g1_i1	0	1	0	0	0	0	18	0	0	0	0	0	0	0	0	AT3G47870	Q9STS6	PF03195	PTHR31301:SF21|PTHR31301
TRINITY_DN100292_c0_g1_i1	0	0	0	0	1.002	6.198	0	0	0	0	0	0	0	0	2.599	AT5G45540		PF04578	PTHR31325:SF222|PTHR31325
TRINITY_DN100292_c0_g1_i2	15.96	8	0	0	10	19.256	2	0	0	0	0	0	0	0	0	AT5G45540		PF04578	PTHR31325:SF222|PTHR31325
TRINITY_DN100292_c0_g1_i3	1.04	0	0	0	0	10.143	0	0	0	0	0	0	0	0	0	AT5G45530		PF04578	PTHR31325|PTHR31325:SF222
TRINITY_DN100292_c0_g1_i4	5	12.882	8.619	0.5	8.034	34.339	6	5	13.832	2.011	1.986	0.501	11.744	12	2.701	AT5G45540		PF04578	PTHR31325:SF222|PTHR31325
TRINITY_DN100292_c0_g1_i5	0	0	5.381	0	0.953	0	0	12.244	4	3.994	9.014	0.999	0	0	0	AT5G45530		PF04578	PTHR31325:SF222|PTHR31325
TRINITY_DN100292_c0_g1_i8	0	2.118	0	0.5	3.012	2.063	0	1	3.168	0.995	0	0.501	4.256	0	2.701	AT5G45530		PF04578	PTHR31325|PTHR31325:SF222
TRINITY_DN1002_c0_g1_i1	2535.8	4203.66	1303.52	1391.22	1549.36	2502.75	5038.49	1167.37	3643.61	1416.36	1245.2	6513.65	4320.5	2975.51	20268.8	AT3G12500	Q41596	PF00182|PF00187	PTHR22595|PTHR22595:SF143
TRINITY_DN1002_c0_g1_i4	192.76	227.182	131.206	20.281	8.06	5.016	434.124	602.11	650.8	653.738	225.445	195.069	33.83	338.063	1641.54	AT3G12500	Q41596	PF00182|PF00187	PTHR22595:SF143|PTHR22595
TRINITY_DN1002_c0_g1_i5	42.179	6.84	28.649	2.464	0	0	0	0	0	16.241	8.164	0	13.03	0	10.049	AT3G12500	Q41596	PF00187|PF00182	PTHR22595|PTHR22595:SF171
TRINITY_DN1002_c0_g1_i6	0	20.26	0	0	15.978	457.943	258.286	0	20.086	22.15	0	8.647	8.948	46.319	7.234	AT3G12500	Q39799	PF00182	PTHR22595:SF144|PTHR22595
TRINITY_DN1002_c0_g1_i7	178.132	82.8	175.725	274.582	125.703	53.977	114.069	343.889	159.635	251.236	216.659	164.824	175.602	210.381	198.258	AT3G12500	Q41596	PF00182	PTHR22595:SF171|PTHR22595|PTHR22595:SF143
TRINITY_DN1002_c0_g1_i8	348.392	145.15	228.19	393.113	238.297	152.023	366.931	236.111	113.365	202.568	207.327	159.176	169.859	192.619	152.568	AT3G12500	Q41596	PF00182	PTHR22595|PTHR22595:SF167
TRINITY_DN1002_c0_g2_i2	3135.22	3438.47	2227.19	2038.43	466.925	489.616	2165.99	7259.83	4286.27	4898.12	3114.14	2073.61	249.726	1153.8	259.032	AT2G17040	I1LPE9	PF02365	PTHR31989|PTHR31989:SF339
TRINITY_DN1002_c0_g2_i3	202.058	118.468	387.785	835.331	58.245	581.059	190.252	666.928	649.329	1148.3	280.627	126.392	69.232	139.784	15.943	AT2G17040	I1LPE9	PF02365	PTHR31989:SF339|PTHR31989
TRINITY_DN10030_c0_g1_i3	19.979	3.97	3.593	84.714	17.872	75.311	0	76.671	11.168	6.421	62.927	0	54.036	75.195	47.722	AT3G11330	Q8VYG9	PF13855	PTHR45752|PTHR45752:SF120
TRINITY_DN10030_c0_g1_i4	372.021	241.03	458.407	414.286	354.128	201.69	459.75	520.329	303.499	373.579	335.073	259	386.964	389.805	248.278	AT3G11330	Q8VYG9	PF13855|PF13855	PTHR45752|PTHR45752:SF120
TRINITY_DN100312_c0_g2_i1	0	0	0	0	0	0	0	37	0	1	5	0	0	0	0
TRINITY_DN100345_c0_g1_i3	0	3	1	0	0	0	0	22	1	3	0	0	0	0	0
TRINITY_DN100349_c0_g1_i1	0	0	0	1	0	0	0	33	0	0	3	0	0	0	0			PF04426
TRINITY_DN10035_c0_g1_i3	3770.95	1515.23	2770.02	2920.44	540.054	1190.55	1014.29	2506.28	1268	2300	1806.53	757	232	819	118	AT5G61190	Q9Y4F3	PF01936|PF14418	PTHR14379:SF29|PTHR14379|PTHR14379|PTHR14379:SF29
TRINITY_DN100364_c0_g3_i2	2	2	35	1	0	0	0	7	1	4	2	0	0	0	0
TRINITY_DN100381_c0_g1_i1	8	1	2	4	0	1	9	2	1	0	0	5	3	3	0	AT4G21210	Q89WP1	PF03618	PTHR31756|PTHR31756:SF3
TRINITY_DN100381_c0_g2_i1	4	3	5	1	0	2	0	1	0	0	4	1	0	4	0		Q9ZC85	PF03653	PTHR40255
TRINITY_DN100384_c0_g2_i1	0	0	2	6	0	0	0	0	0	0	5	0	0	0	0
TRINITY_DN10038_c0_g1_i10	119.57	79.156	141.054	121.073	108.883	640.195	208.049	625.932	458.601	280.823	291.81	317.71	177.63	472.349	194.732	AT1G68570	Q9SX20	PF00854	PTHR11654|PTHR11654:SF326
TRINITY_DN10038_c0_g1_i11	13.955	16.815	14.657	6.817	49.738	74.498	29.4	9.294	4.8	1.834	6.286	1.382	14.052	5.112	7.537	AT1G68570	Q9SX20	PF00854	PTHR11654:SF326|PTHR11654
TRINITY_DN10038_c0_g1_i14	22.73	53.588	28.885	60.655	77.237	47.165	48.855	0	0	9.283	0	2.592	37.87	14.243	12.958	AT1G68570	Q9SX20	PF00854	PTHR11654|PTHR11654:SF326
TRINITY_DN10038_c0_g1_i9	52.744	61.441	28.404	37.411	36.06	142.555	45.444	206.485	171.71	105.061	94.85	72.315	69.448	160.296	65.773	AT1G68570	Q9SX20	PF00854	PTHR11654:SF326|PTHR11654
TRINITY_DN10038_c0_g2_i1	1	2	4	1.029	1	2	8	8	4	3	1	3	0	3	1
TRINITY_DN10039_c0_g1_i2	0	3.225	32.46	12.529	0	23.343	2.155	18.618	19.859	10.613	10.416	9.191	43.161	18.643	1.995				PTHR34466|PTHR34466:SF3
TRINITY_DN10039_c0_g1_i4	164	131.056	195.21	245.382	92.049	145.541	109.508	177.897	143.141	130.773	94.979	86.943	166.263	191.48	81.087				PTHR34466:SF3|PTHR34466
TRINITY_DN10039_c0_g1_i5	0	0	0	0	1.985	1.439	5.2	0	0	0	5.748	2.312	11.245	3.571	0				PTHR34466:SF3|PTHR34466
TRINITY_DN10039_c0_g1_i6	0	0	3.454	5.089	0	6.152	11.138	9.485	0	5.679	14.857	9.554	3.331	23.692	0				PTHR34466|PTHR34466:SF3
TRINITY_DN10039_c0_g1_i7	0	5.187	0	0	3.289	6.755	0	0	0	0	0	0	0	0	0				PTHR34466:SF3|PTHR34466
TRINITY_DN10039_c0_g1_i8	0	40.532	0	0	2.677	0	0	0	0	0	0	0	0	25.614	0				PTHR34466:SF3|PTHR34466
TRINITY_DN1003_c0_g1_i1	15	70	24	7	342.455	40	80	55	65	54	11	391.009	258.992	64	39	AT5G60800	Q9FJH5	PF00403|PF00403	PTHR46413|PTHR46413:SF2
TRINITY_DN1003_c0_g1_i11	1859.01	3007.88	1654	743.364	4308	9636.23	3808.77	1316.01	3471	2516.43	985	4642.82	2796.76	5265.68	841	AT5G60800	Q9FJH5		PTHR46413:SF7|PTHR46413
TRINITY_DN100401_c0_g1_i1	1	3	3	0	3	8	1	0	0	1	0	0	3	0	0	AT5G45820	Q9LWM4	PF00069	PTHR43895:SF3|PTHR43895
TRINITY_DN100402_c0_g1_i1	4	1	1	2	0	1	4	1	3	3	2	0	1	3	0		Q8DP63	PF01522	PTHR10587|PTHR10587:SF105
TRINITY_DN100405_c0_g1_i1	0	1	6	2	0	0	0	10	0	6	0	1	0	0	0	AT3G56120	C7YK87	PF02475	PTHR23245:SF36|PTHR23245
TRINITY_DN10040_c1_g1_i1	19.238	1.787	31.084	24.442	18.822	13.541	15.68	34.573	18.307	25.527	16.222	23.232	39.681	57.994	35.081	AT4G08630	Q8RWD5		PTHR31762|PTHR31762:SF10
TRINITY_DN10040_c1_g1_i10	18.01	3.825	7.481	0	3.171	0	0	48.608	63.188	19.437	60.79	18.476	49.871	36.135	4.372	AT4G08630	Q8RWD5		PTHR31762|PTHR31762|PTHR31762:SF10|PTHR31762:SF10
TRINITY_DN10040_c1_g1_i18	46.847	33.987	58.216	51.014	29.238	19.743	55.573	64.014	61.389	38.139	45.157	16.771	47.491	129.805	29.163	AT4G08630	Q8RWD5		PTHR31762:SF10|PTHR31762
TRINITY_DN10040_c1_g1_i21	0	11.312	0	36.359	17.002	0	0	0	27.062	26.15	0	0	49.561	7.775	0	AT4G08630	Q8RWD5		PTHR31762:SF10|PTHR31762|PTHR31762|PTHR31762:SF10
TRINITY_DN10040_c1_g1_i28	52.78	57.297	52.726	0	0	43.996	113.688	99.999	0	37.594	11.446	50.437	0	101.075	48.54	AT4G08630	Q8RWD5		PTHR31762:SF10|PTHR31762|PTHR31762:SF10|PTHR31762
TRINITY_DN10040_c1_g1_i3	1.19	4.792	0	0	1.509	0	1.165	0	1.054	0	0	0	0	11.925	0				PTHR31762:SF10|PTHR31762
TRINITY_DN10040_c1_g1_i37	58.935	0	19.495	78.049	71.259	36.72	32.731	0	0	48.153	57.385	0	14.135	84.29	31.787	AT4G08630	Q8RWD5		PTHR31762:SF10|PTHR31762|PTHR31762:SF10|PTHR31762
TRINITY_DN10040_c1_g1_i4	0	0	1	1.136	0	0	0	7.806	0	0	0	1.085	2.26	0	5.057				PTHR31762:SF10|PTHR31762
TRINITY_DN100426_c0_g1_i2	2	1	0	3	4	0	3	4	8	3	2	2	3	5	0		O32256	PF00892|PF00892	PTHR22911|PTHR22911:SF113
TRINITY_DN100438_c0_g1_i1	0	0	0	0	0	0	83	0	0	0	0	0	0	0	0	AT5G58420	Q4GXU6	PF00900|PF08071|PF00467|PF01479|PF16121	PTHR11581:SF33|PTHR11581:SF33|PTHR11581|PTHR11581
TRINITY_DN100447_c0_g1_i1	1	0	0	0	0	0	0	1	3	3	0	0	0	0	0	AT2G39970	P21245	PF00153|PF00153	PTHR45939:SF5|PTHR45939
TRINITY_DN100464_c0_g1_i1	0	3	22	5	0	0	0	1	10	6	0	0	0	0	0
TRINITY_DN100478_c0_g1_i1	0	0	4	0	0	0	0	0	5	6	42	0	0	0	0
TRINITY_DN10047_c0_g1_i1	19	12.747	0	34	69.189	41.878	17.831	28.452	20.374	29.121	22.744	56.217	92.885	68.853	59.279	AT3G09080	Q6DFF9	PF00400|PF00400|PF00400|PF00400|PF00400	PTHR42968|PTHR42968:SF31
TRINITY_DN10047_c0_g1_i11	0	0	13.205	0	0	0	22.169	0	0	0	0	0	13.334	12.846	0	AT3G09080			PTHR42968:SF29|PTHR42968
TRINITY_DN10047_c0_g1_i12	0	0	0	0	4.581	0	0	24.418	13.186	12.251	23.818	13.141	73.966	39.361	22.616				PTHR42968:SF29|PTHR42968
TRINITY_DN10047_c0_g1_i13	0	0	0	0	0	15.027	0	3.131	8.44	7.628	1.438	11.642	23.547	8.895	5.976	AT3G09080			PTHR42968|PTHR42968:SF29
TRINITY_DN10047_c0_g1_i5	0	2.253	18.795	0	77.232	33.094	0	0	0	0	0	0	23.269	13.045	9.128	AT3G09080	Q6DFF9	PF00400|PF00400|PF00400|PF00400|PF00400	PTHR42968|PTHR42968:SF31
TRINITY_DN100482_c0_g2_i1	6	5	9	31	0	0	0	82	6	7	8	0	0	5	11	ATMG00510	P22142	PF00346	PTHR11993
TRINITY_DN100486_c0_g1_i1	0	0	0	6	0	0	0	3	0	4	4	0	0	0	0	AT4G18330	Q24208		PTHR42854|PTHR42854:SF12
TRINITY_DN10048_c0_g1_i1	630.834	771.683	767.806	698.531	932.405	914.299	1019.71	1133.69	882.18	1059.94	889.216	973.294	1112.44	1193.63	819.448	AT3G48780	Q9M304	PF00155	PTHR13693:SF88|PTHR13693
TRINITY_DN10048_c0_g1_i11	378.071	390.147	447.762	565.297	462.16	475.002	404.683	1035.85	509.359	614.88	776.85	566.06	600.374	722.84	378.868	AT5G23670	Q9LSZ9	PF00155	PTHR13693|PTHR13693:SF88
TRINITY_DN10048_c0_g1_i15	0	0	0	0	0	0	0	0	0	0	0	0	0	0	0	AT3G48780	Q9M304	PF00155	PTHR13693:SF88|PTHR13693
TRINITY_DN10048_c0_g1_i2	0	0	5.099	0	0	2.7	0	31.81	23.674	12.474	3.792	15.336	12.659	13.744	0	AT5G23670	Q9LSZ9	PF00155	PTHR13693|PTHR13693:SF88
TRINITY_DN10048_c0_g1_i9	48.095	65.597	37.333	23.172	65.098	54.861	111.611	33.838	48.786	22.966	38.142	55.375	54.518	89.786	44.684	AT5G23670	Q9LSZ9	PF00155	PTHR13693|PTHR13693:SF88
TRINITY_DN1004_c0_g1_i1	11.792	54.215	23.367	80.492	41.194	78.972	70.66	128.462	51.426	63.199	32.118	55.907	91.204	378.274	159.39	AT5G23540	Q9LT08	PF01398|PF13012	PTHR10410|PTHR10410:SF22
TRINITY_DN1004_c0_g1_i10	137.965	181.457	251.048	125.414	429.902	198.278	419.305	310.272	292.887	191.563	254.73	454.831	815.858	691.348	540.34	AT5G23540	Q9LT08	PF13012|PF01398	PTHR10410:SF22|PTHR10410
TRINITY_DN1004_c0_g1_i17	303.679	203.029	433.514	465.265	265.205	228.81	294.998	526.884	314.827	339.534	356.622	246.242	592.166	1052.19	237.15	AT5G23540	Q9LT08	PF01398|PF13012	PTHR10410|PTHR10410:SF22
TRINITY_DN1004_c0_g1_i24	1156.09	1095.47	1053.6	1085.81	1452.25	1297.99	1371.69	1308.41	900.481	1481.04	1036.12	1401.99	1391.88	935.745	1167.34	AT1G47480	Q9SX78	PF07859	PTHR23024:SF549|PTHR23024
TRINITY_DN1004_c0_g1_i9	986.201	641.625	816.473	1001.04	905.378	895.938	824.924	1574.31	979.633	1044.66	1221.41	1067.92	1416.78	2087.45	1007.33	AT1G47480	Q9SX78	PF07859	PTHR23024:SF525|PTHR23024
TRINITY_DN100504_c0_g1_i3	0	0	0	3	0	0	0	16	0	1	0	2	0	0	0			PF12973
TRINITY_DN10051_c0_g1_i3	0	11.862	0	0	201.849	189.044	15.379	5.97	4.211	0	0	22.645	190.332	106.934	105.664	AT5G05180	Q84VY2	PF07765	PTHR32258|PTHR32258:SF14
TRINITY_DN10051_c0_g1_i7	0	4.053	0	0	202.575	152.005	33.142	8.611	2.984	1.395	0	106.316	211.362	74.112	151.981	AT5G05180	F4KEW8	PF07765	PTHR32258|PTHR32258:SF14
TRINITY_DN10051_c0_g1_i9	7	15.085	6	10	934.146	656.035	76.489	19.419	40.805	17.605	14	431.04	884.365	321.65	722.36	AT5G05180	Q84VY2	PF07765	PTHR32258:SF14|PTHR32258
TRINITY_DN100521_c0_g3_i1	0	0	3	0	0	0	0	12	0	1	0	0	0	0	0		Q9CWK8	PF09325
TRINITY_DN10052_c0_g1_i11	300.191	307.985	421.02	435	452.964	315.024	403	601	493	395	433	455	697	431.01	358	AT2G30160	P10566	PF00153|PF00153|PF00153	PTHR45758|PTHR45758:SF11
TRINITY_DN100535_c0_g1_i1	0	2.523	0	0	14.452	3	1	0	5	3	0	2.768	5.224	7	3	AT3G07040	Q9XIF0	PF00931	PTHR23155:SF955|PTHR23155
TRINITY_DN100535_c0_g1_i2	3	2.477	0	0	2.548	0	0	0	0	0	0	1.232	2.776	0	1			PF18052
TRINITY_DN10054_c0_g1_i1	33.349	22.264	58.792	57.714	82.763	74.383	67.859	80.19	26.194	46.529	23.154	40.389	63.453	72.734	22.175		Q9SK27	PF02298	PTHR33021:SF31|PTHR33021
TRINITY_DN10054_c0_g1_i2	666.651	626.814	603.208	733.65	1505.02	891.552	1115.12	391.988	635.144	245.471	419.846	1095.66	1495.57	1161.76	429.825	AT2G32300	O82081	PF02298	PTHR33021:SF31|PTHR33021
TRINITY_DN10054_c1_g1_i1	0	0	0	0	11.554	0	0	0	0	0	0	0	12.116	0	4.235	AT4G09060			PTHR35689
TRINITY_DN10054_c1_g1_i4	10	33	17	23	150.753	133.847	33	22	15	4.095	19	51.465	146.523	181	96.592	AT4G09060			PTHR35689
TRINITY_DN10054_c1_g1_i6	1	6	0	0	228.446	258.002	38	8	7	5	0	50	152.884	140.233	111.765	AT4G09060			PTHR35689
TRINITY_DN10054_c1_g1_i8	0	0	0	0	6.247	2.153	0	0	0	5.905	0	12.535	1.477	0	0	AT4G09060			PTHR35689
TRINITY_DN100552_c0_g2_i1	0	8.458	0	0	0	0	0	0	0	0	0	0	0	0	0
TRINITY_DN100552_c0_g2_i2	2	5.542	9	0	0	0	0	4	0	15	0	0	0	0	0
TRINITY_DN100563_c0_g1_i4	93	78	80	174	2	0	0	14	0	1	1	4	2	0	0
TRINITY_DN100579_c0_g1_i2	0	0	12	14	0	0	0	3	55	21	66	1	0	0	0		P87179	PF01822	PTHR24269:SF21|PTHR24269
TRINITY_DN10057_c0_g1_i2	0	1	0	0	0	0	58.924	0	0	0	0	0	4	0	1.369	AT5G23270	Q9FMX3	PF00083	PTHR23500|PTHR23500:SF460
TRINITY_DN10057_c0_g1_i3	1	0	0	1	0	8	782.438	0	0	0	0	0	0	5	43.269	AT5G23270	Q9FMX3	PF00083	PTHR23500:SF460|PTHR23500
TRINITY_DN10057_c0_g1_i4	0	0	0	0	2	0	877.588	0	0	0	0	0	0	2	6.362	AT5G23270	Q9FMX3	PF00083	PTHR23500|PTHR23500:SF460
TRINITY_DN10057_c0_g1_i8	0	1	0	1	0	2	3.689	0	1	0	0	0	0	0	0	AT5G23270	Q9FMX3	PF00083	PTHR23500:SF460|PTHR23500
TRINITY_DN100586_c0_g1_i1	0	0	0	0	0	0	0	1	0	2	0	0	0	0	0	AT1G22170	A1SP05	PF00300	PTHR11931:SF0|PTHR11931
TRINITY_DN1005_c0_g1_i1	484.968	292.99	476	505	398.03	374.119	293.614	558.598	321	426	588	326	525	430	365	AT5G19820	Q8BKC5	PF13646|PF02985|PF18829|PF18808	PTHR10527:SF78|PTHR10527
TRINITY_DN1005_c0_g2_i1	0	0	0	0	1.364	14.899	0	0	1.546	1.365	3.923	0	0	7.333	1.86	AT1G80260	Q8BKN5	PF04130|PF17681	PTHR19302|PTHR19302:SF65
TRINITY_DN1005_c0_g2_i2	5.749	23.368	20.036	16.782	24.857	70.538	23.529	32.277	29.985	41.572	30.475	42.397	108.888	168.412	36.366	AT1G80260	Q8BKN5	PF04130|PF17681	PTHR19302:SF65|PTHR19302
TRINITY_DN1005_c0_g2_i5	175.116	214.287	240.649	252.685	383.059	260.359	311.148	204.335	153.827	178.499	161.745	291.058	396.789	313.102	357.409	AT1G80260	Q8BKN5	PF04130|PF17681	PTHR19302:SF65|PTHR19302
TRINITY_DN1005_c0_g2_i6	123.542	145.346	112.443	130.899	188.302	144.866	203.302	66.352	62.828	38	42.522	41.907	97.986	90.167	57.393	AT1G80260			PTHR19302|PTHR19302:SF65
TRINITY_DN1005_c0_g2_i7	3.808	0	6.873	8.634	22.776	66.458	9.636	75.507	85.814	33.565	43.334	18.638	59.819	95.987	19.144	AT1G80260	Q8BKN5	PF17681|PF04130	PTHR19302|PTHR19302:SF65
TRINITY_DN1005_c1_g1_i1	0	6.226	2.694	1.253	2.412	0	0	24.188	23.087	29.69	18.261	26.726	19.008	13.414	23.927	AT3G58140	Q94K73	PF03147
TRINITY_DN1005_c1_g1_i2	381.144	227.024	310.641	413.019	295.87	218.812	280.979	443.617	315.309	351.754	349.834	341.567	462.377	375.404	369.026	AT3G58140	Q94K73	PF01409	PTHR11538|PTHR11538:SF41
TRINITY_DN1005_c1_g1_i9	152.856	127.755	99.665	206.728	128.717	79.188	143.021	189.194	126.604	107.556	152.905	140.709	155.615	140.182	139.038	AT3G58140	Q94K73	PF01409	PTHR11538:SF41|PTHR11538
TRINITY_DN100612_c0_g1_i1	0	0	0	0	0	0	0	0	4	0	15.033	0	0	0	0
TRINITY_DN100620_c0_g1_i1	0	0	1	0	0	0	0	0	1	0	0	0	0	1	0	AT3G45300	Q9FS87	PF00441	PTHR43884|PTHR43884:SF18
TRINITY_DN100620_c0_g1_i2	0	0	0	0	0	0	2.023	1	0	0	0	2	2	0	0	AT3G45300	Q9FS87	PF00441	PTHR43884|PTHR43884:SF18
TRINITY_DN100620_c0_g2_i2	3	2	1	0	1	2	1.977	2	1	0	3	6	3	0	0	AT3G45300	Q75IM9	PF02771	PTHR43884:SF12|PTHR43884
TRINITY_DN100626_c0_g1_i2	0	0	7	12	0	0	0	12	0	1	8	0	0	0	0		G2TRP6	PF02297	PTHR47677
TRINITY_DN10062_c0_g2_i2	334	258	565	574	586	275.002	468.003	675.032	407	475	502.471	406	489	537.012	399.004	AT1G63160	Q7XRX1	PF08542	PTHR11669:SF5|PTHR11669
TRINITY_DN100639_c0_g1_i4	6	0	55	60	0	0	1	78	1	2	9	3	0	0	0		B7ZK61	PF00082|PF05922	PTHR43806|PTHR43806:SF11
TRINITY_DN100666_c0_g1_i1	0	0	0	1	0	0	0	2.084	0	0	0	0	0	0	0				PTHR39477
TRINITY_DN100666_c0_g1_i2	0	0.5	0	0	0	0	0	78.702	1	33	3	0.5	1	3	0				PTHR39477
TRINITY_DN100666_c0_g1_i3	0	0.5	12	0	0	0	0	52.214	1	0	0	0.5	1	0	0				PTHR39477
TRINITY_DN10066_c0_g3_i1	9	7	20	21	21	9	20	58	34	19	29	9	22	13	10
TRINITY_DN100672_c0_g1_i1	9	14	22	16	0	0	0	0	0	0	0	0	0	0	0	AT2G31985	B4FFZ9	PF06884	PTHR31360|PTHR31360:SF0
TRINITY_DN10068_c0_g2_i1	1.089	0	0	0	6.387	2.339	2.218	1.248	0	0	0	6.003	4.989	3.811	1.113	AT4G39010	Q93YQ7	PF00759	PTHR22298|PTHR22298:SF129
TRINITY_DN10068_c0_g2_i2	35.911	235.797	32	25	917.138	427.188	423.212	22.752	136.492	22.852	11	296.105	751.176	421.912	460.27	AT4G39010	Q93YQ7	PF00759	PTHR22298:SF129|PTHR22298
TRINITY_DN10068_c0_g2_i3	0	0	0	0	10.503	17.637	3.569	0	10.508	1.148	0	28.891	83.834	26.277	54.618	AT4G39010	Q93YQ7	PF00759	PTHR22298|PTHR22298:SF129
TRINITY_DN10069_c0_g1_i1	62.646	35.427	98.09	161.205	43.235	34.301	32.705	0	0	0	0	0	0	0	14.939	AT5G20350	Q52T38	PF12796|PF12796|PF13857	PTHR24161|PTHR24161:SF82
TRINITY_DN10069_c0_g1_i2	92.92	122.114	155.939	122.163	54.35	157.009	169.308	141.616	46.979	110.134	95.686	92.888	43.058	72.769	39.655	AT5G20350	Q52T38		PTHR24161:SF82|PTHR24161
TRINITY_DN10069_c0_g1_i3	0	0	0	0	0	0	0	103.044	26.096	107.947	152.273	63.188	39.219	93.42	0	AT5G20350	Q52T38	PF13857|PF12796|PF12796	PTHR24161|PTHR24161:SF82
TRINITY_DN10069_c0_g1_i4	5.362	7.163	0	0	0	28.136	36.057	11.375	35.062	2.985	23.49	3.414	10.455	38.432	0	AT5G20350	Q52T38		PTHR24161|PTHR24161:SF82
TRINITY_DN10069_c0_g1_i5	1037.15	790.855	1073.16	1343.21	786.006	948.06	792.948	1113.75	621.863	827.269	853.919	678.929	625.91	741.385	663.043	AT5G20350	Q52T38	PF13857|PF13637|PF12796|PF01529	PTHR24161:SF82|PTHR24161
TRINITY_DN10069_c0_g1_i6	47.268	51.96	46.81	75.635	28.927	33.524	30.422	92.169	0	0	0	8.395	0	0	19.843	AT5G20350	Q52T38	PF12796|PF12796|PF13857	PTHR24161|PTHR24161:SF82
TRINITY_DN10069_c0_g1_i7	0	65.55	0	0	50.23	26.793	115.162	11.342	0	3.666	41.669	37.891	38.358	0	0	AT5G20350	Q52T38	PF13857|PF12796|PF12796	PTHR24161:SF82|PTHR24161
TRINITY_DN10069_c1_g1_i1	540.884	456.962	625.946	698.764	796.29	645.152	1307.24	946.496	675.226	772.993	686.304	1005.82	1133.8	1126.68	1053.54	AT2G27450	Q8VYF5	PF00795	PTHR43674:SF6|PTHR43674
TRINITY_DN10069_c1_g1_i6	65.116	70.572	147.054	142.236	155.71	54.857	165.67	75.822	19.774	32.012	29.696	10.179	72.089	35.31	26.461	AT2G27450	Q8VYF5	PF00795	PTHR43674|PTHR43674:SF6
TRINITY_DN10069_c2_g2_i1	5	13	10	6	7	13	4	8	11	10	1	7	27	7	8	AT5G25160	Q39262		PTHR47287:SF1|PTHR47287
TRINITY_DN1006_c0_g1_i2	115.153	74.707	174.824	122.032	268.844	138.029	105.134	304.22	54.239	140.367	120.957	54.7	126.251	279.118	125.97	AT5G58450	F4KEY9	PF09797	PTHR22767|PTHR22767:SF3
TRINITY_DN1006_c0_g1_i3	0	0	0	0	0	0	0	0	0	0	0	0	0	0	0	AT5G58450	F4KEY9	PF09797	PTHR22767|PTHR22767:SF3
TRINITY_DN1006_c0_g1_i7	852.07	668.291	905.052	1005.14	560.222	712.971	536.866	1143.78	795.755	698.633	852.043	576.539	884.505	1036.88	463.539	AT5G58450	F4KEY9	PF09797	PTHR22767|PTHR22767:SF3
TRINITY_DN100701_c0_g1_i1	0	0	0	0	0	0	0	9	0	2	3	0	0	0	0		Q8P778	PF00436
TRINITY_DN10070_c0_g1_i2	16.281	0	0	0	5.007	10.477	13.063	19.092	37.978	70.112	26.883	44.067	93.295	38.643	65.504	AT2G19860	Q9SEK2	PF00349|PF03727	PTHR19443|PTHR19443:SF62
TRINITY_DN10070_c0_g1_i3	5.661	9.546	1.249	8.779	15.71	32.84	9.656	1.315	20.303	6.61	4.405	13.877	24.145	20.15	9.38	AT2G19860	P93834	PF03727|PF00349	PTHR19443:SF62|PTHR19443
TRINITY_DN10070_c0_g1_i4	5.369	3.059	27.046	17.533	40.431	32.158	44.147	21.659	50.097	11.253	0	30.254	72.664	69.607	12.286	AT2G19860	Q9SEK2	PF03727|PF00349	PTHR19443|PTHR19443:SF62
TRINITY_DN10070_c0_g1_i8	0	8.206	3.098	0	5.872	7.716	0	70.979	10.676	37.661	27.198	30.746	60.261	48.623	29.767	AT2G19860	Q9SEK3	PF03727	PTHR19443:SF62|PTHR19443
TRINITY_DN10070_c0_g2_i1	0	1.435	0	10.669	1.602	6.566	0	0	0	0	0	0	8.28	6.009	0	AT2G19860	Q9SEK2	PF00349|PF03727	PTHR19443:SF62|PTHR19443
TRINITY_DN10070_c0_g2_i3	0	0	0	0	0	0	0	2.82	5.642	9.963	8.881	0	0	12.812	10.027	AT2G19860	Q9SEK2	PF03727|PF00349	PTHR19443:SF62|PTHR19443
TRINITY_DN10070_c0_g2_i5	91.689	141.754	77.651	90.019	243.288	248.244	241.134	112.134	155.232	147.667	137.633	175.056	330.355	335.157	222.035	AT2G19860	Q9SEK2	PF00349|PF03727	PTHR19443|PTHR19443:SF62
TRINITY_DN10070_c1_g1_i1	0	0	0	0	5.525	10.179	0	3.372	15.07	0	0	0	14.621	2.302	0	AT5G08540			PTHR36793:SF1|PTHR36793
TRINITY_DN10070_c1_g1_i2	7.981	17.105	28.411	21.956	0	0	0	20.645	0	0	17.338	10.861	26.197	26.506	14.983	AT5G08540			PTHR36793|PTHR36793:SF1
TRINITY_DN10070_c1_g1_i3	0	0	8.664	12.694	0	0	14.937	12.602	3.55	17.433	0	0	0	0	0	AT5G08540			PTHR36793|PTHR36793:SF1
TRINITY_DN10070_c1_g1_i4	260.019	205.895	233.925	281.35	353.313	233.741	272.121	325.619	209.38	267.567	398.662	334.139	412.182	330.192	257.015	AT5G08540			PTHR36793
TRINITY_DN100717_c0_g1_i1	2	0	0	0	0	0	0	0	0	0	0	0	0	0	0
TRINITY_DN100717_c0_g3_i1	0	0	2	0	0	0	0	7	1	0	1	0	0	0	0
TRINITY_DN10071_c0_g1_i1	426.003	298	757.593	672	498	342.473	498	819.186	555	556.723	601.998	572	559	747	526.908	AT3G10400	Q9CAE4	PF00076|PF00098	PTHR46259|PTHR46259:SF1
TRINITY_DN10071_c0_g2_i1	40	43	58	45	23	44	27	103	104	61.002	72	45	53	104	57	AT3G10400	Q9CAE4	PF00098	PTHR46259
TRINITY_DN10071_c1_g1_i13	991.763	658.71	1090.57	1027.25	586.488	433.317	872.546	568.542	314.947	519.702	408.816	272.34	356.262	441.588	277.769	AT3G24800	Q8LBL5	PF13445|PF00569	PTHR15898|PTHR15898:SF15
TRINITY_DN10071_c1_g1_i7	67.944	66.197	166.89	146.696	38.217	78.18	42.783	407.608	364.594	320.84	309.898	294.56	285.306	413.708	256.531	AT3G24800	Q8LBL5	PF13445|PF00569	PTHR15898|PTHR15898:SF15
TRINITY_DN10071_c1_g1_i8	214.208	201.094	221.541	563.057	184.905	67.505	176.66	471.85	201.458	149.458	306.286	158.1	246.433	172.705	143.833	AT3G24800	Q8LBL5	PF13445|PF00569	PTHR15898:SF15|PTHR15898
TRINITY_DN10072_c0_g1_i10	448.909	743.86	343.759	457.526	795.138	989.884	1724.85	403.826	260.091	466.27	437.261	961.504	878.781	726.365	1150.82	AT2G31200	Q9ZSK2	PF00241	PTHR11913|PTHR11913:SF96
TRINITY_DN10072_c0_g1_i12	0	6.127	0	0	8.094	183.972	69.774	9.11	13.683	26.364	0	73.163	67.17	36.653	9.218	AT2G38940	Q494P0	PF00083	PTHR24064|PTHR24064:SF508
TRINITY_DN10072_c0_g1_i13	286.603	291.655	262.011	251.294	238.426	260.461	508.723	107.586	98.369	178.14	174.43	207.837	182.711	246.452	233.633	AT3G54700	Q494P0	PF00083	PTHR24064|PTHR24064:SF508
TRINITY_DN10072_c0_g1_i5	1168	1397.72	1158.36	1264.09	1043.06	972.445	1590.58	1338.2	1515	1380.5	1148.04	1929	1438.87	1247	1716.26	AT2G31200	Q8SAG3	PF00241	PTHR11913|PTHR11913:SF83
TRINITY_DN10072_c0_g1_i8	207.504	140.554	221.23	325.463	143.782	173.046	214.658	218.478	115.946	184.225	218.739	90.649	204.475	210.841	184.036	AT2G31200	Q9ZSK2	PF00241	PTHR11913|PTHR11913:SF83
TRINITY_DN10072_c1_g1_i1	804.536	590.427	741	786.043	625.051	366.411	456.053	636.066	569.767	628	645	690.4	1006.86	602	645.543	AT5G13510	O80362	PF00466	PTHR11560
TRINITY_DN100747_c0_g1_i2	12	19	22	10	19	16	16	9	1	0	3	2	2	4	3	AT1G15890	Q9LMP6
TRINITY_DN10074_c0_g1_i11	2.232	24.03	24.687	7.919	46.143	78.671	42.071	48.456	18.057	15.835	38.087	9.926	26.511	16.859	12.868	AT2G23890	Q75K12	PF05761	PTHR12103|PTHR12103:SF12
TRINITY_DN10074_c0_g1_i12	48.083	20.577	6.798	28.387	66.962	176.92	54.159	15.21	24.371	19.874	25.335	17.437	42.843	0	0	AT2G23890	Q75K12	PF05761	PTHR12103:SF12|PTHR12103
TRINITY_DN10074_c0_g1_i2	0	1.688	0	2.196	0	0	4.105	0	0	0	0	0	0	0	0	AT2G23890	Q75K12	PF05761	PTHR12103|PTHR12103:SF12
TRINITY_DN10074_c0_g1_i4	136.685	161.705	206.515	280.498	288.14	345.945	294.665	297.333	151.572	259.291	206.578	217.053	221.651	405.141	193.132	AT2G23890	Q75K12	PF05761	PTHR12103:SF12|PTHR12103
TRINITY_DN10074_c0_g1_i5	0	0	0	0	32.757	20.465	0	0	0	0	0	10.583	0	0	0	AT2G23890	Q75K12	PF05761	PTHR12103|PTHR12103:SF12
TRINITY_DN10075_c0_g1_i4	1	0	0	2	79	33	240	0	3	4	0	255.079	28	45	803.285	AT5G18840	Q8LBI9	PF00083	PTHR48021:SF37|PTHR48021
TRINITY_DN10076_c0_g1_i2	641.396	560.664	830.756	738.366	514.163	501.901	581.783	1454.07	1179	1138.51	1225.44	1440.93	1407.33	1268.43	901.998	AT5G13470			PTHR33912|PTHR33912:SF3
TRINITY_DN10076_c0_g1_i3	259.633	271.336	271.749	365.634	354.812	229.098	292.819	0	0	0	1.316	0	0	1.322	0	AT5G13470			PTHR33912:SF3|PTHR33912
TRINITY_DN10077_c0_g1_i1	44	22	32	25	36	34	24	51	37	21	29	24	29	99	15	AT1G24095	P40761	PF04134	PTHR33639|PTHR33639:SF1
TRINITY_DN100796_c0_g1_i1	167	56	146.002	242	0	1	0	8	0	7	1	18	3	0	0		P87049	PF08613	PTHR15615:SF36|PTHR15615
TRINITY_DN10079_c0_g1_i14	42.323	14.615	63.091	51.547	49.927	34.649	66.337	40.036	15.759	39.946	31.694	17.76	25.194	73.253	37.866	AT1G15420			PTHR42968:SF14|PTHR42968
TRINITY_DN10079_c0_g1_i7	6.677	9.385	10.909	27.265	32.064	15.351	20.663	14.964	7.241	3.054	8.306	6.24	15.806	19.747	11.134				PTHR42968|PTHR42968:SF14
TRINITY_DN1007_c0_g1_i5	856.036	1029.74	613.32	347.135	40.182	341.037	307.133	153.167	99.85	1306.2	272.045	639.587	2.932	98.625	3.528	AT4G13420	Q9M7K4	PF02705	PTHR30540:SF99|PTHR30540
TRINITY_DN1007_c0_g1_i6	24911.6	28794.6	9156.71	8018.19	2275.45	6232.6	8240.33	6807.13	5562.35	39452.1	12475.3	16116.6	552.068	4620.6	753.512	AT4G13420	Q9M7K4	PF02705	PTHR30540|PTHR30540:SF99
TRINITY_DN100811_c0_g1_i2	0	3	9	0	0	0	0	28	0	13	0	1	1	1	0	AT1G13180	P78712	PF00022	PTHR11937|PTHR11937:SF175
TRINITY_DN100824_c0_g2_i2	55.515	33.483	34	39.046	85	136.369	58.635	30	17.433	26	16	26.995	30	54.086	16
TRINITY_DN10082_c0_g1_i1	0	0	37.332	38.068	0	0	0	173.292	53.676	55.198	115.23	0	60.169	29.624	149.245	AT3G17810	Q9LVI9	PF01180	PTHR43073:SF3|PTHR43073
TRINITY_DN10082_c0_g1_i12	372.96	409.987	366.848	492.653	363.941	366.14	666.525	698.589	479.22	593.267	647.043	657.523	502.568	543.814	698.711	AT3G17810	Q9LVI9	PF01180	PTHR43073:SF3|PTHR43073
TRINITY_DN10082_c0_g1_i5	124.248	183.894	131.176	90.096	169.258	133.171	402.051	287.848	242.61	269.745	292.358	341.074	266.279	273.931	464.421	AT3G17810	Q9LVI9	PF01180	PTHR43073:SF3|PTHR43073
TRINITY_DN10082_c0_g1_i6	0	13.745	0	0	0	0	1.675	0	12.37	0	152.834	13.968	0	0	0	AT3G17810	Q9LVI9	PF01180	PTHR43073|PTHR43073:SF3
TRINITY_DN10082_c0_g1_i8	12.086	10.55	14.075	4.488	9.864	6.075	24.262	30.197	6.463	10.782	26.086	24.758	8.904	19.47	30.424	AT3G17810	Q9LVI9	PF01180	PTHR43073:SF3|PTHR43073
TRINITY_DN10082_c0_g1_i9	435.656	350.92	518.569	421.676	173.039	141.945	443.447	307.075	227.585	339.014	179.441	368.498	140.123	254.161	76.2	AT3G17810	Q9LVI9	PF01180	PTHR43073|PTHR43073:SF3
TRINITY_DN100836_c0_g1_i5	10	9	14	6	16	8	16	23	8	6	25	10	16	26	12
TRINITY_DN10083_c0_g1_i1	249.481	252.998	0	296.425	105.572	35.7	62.556	251.753	116.258	142.915	227.777	162.638	129.153	85.988	109.763	AT5G55220	Q8S9L5	PF05698|PF05697	PTHR30560|PTHR30560:SF3
TRINITY_DN10083_c0_g1_i12	63.593	116.955	127.578	83.341	12.575	0	0	83.518	0	0	0	68.935	0	0	0	AT5G55220	Q8S9L5	PF05697	PTHR30560:SF3|PTHR30560
TRINITY_DN10083_c0_g1_i2	0	0	10.225	7.229	0	0	0	8.008	0	36.463	41.546	0	0	3.423	3.834	AT5G55220	Q8S9L5	PF05697	PTHR30560|PTHR30560:SF3
TRINITY_DN10083_c0_g1_i4	0	0	0	0	0	0	0	0	0	0	0	0	0	0	0	AT5G55220	Q8S9L5	PF05698	PTHR30560|PTHR30560:SF3
TRINITY_DN10083_c0_g1_i7	55.444	23.129	174.441	0	0	36.579	53.671	82.693	46.667	132.843	114.171	87.427	56.737	94.499	42.747	AT5G55220	Q8S9L5	PF05698	PTHR30560|PTHR30560:SF3
TRINITY_DN10083_c0_g1_i8	0	0	0	0	0	10.305	33.701	0	59.047	32.239	60.586	0	40.661	100.517	0	AT5G55220	Q8S9L5		PTHR30560|PTHR30560:SF3
TRINITY_DN10083_c0_g1_i9	57.487	45.882	187.756	123.005	0	14.416	39.072	43.027	46.263	58.743	73.92	0	46.449	91.572	13.656	AT5G55220	Q8S9L5	PF05697|PF05698	PTHR30560:SF3|PTHR30560
TRINITY_DN10085_c0_g1_i12	52.94	76.76	120.574	60.034	94.026	73.479	56.244	197.612	169.32	162.739	190.308	70.02	210.938	295.775	114.998	AT1G77130	Q8W4A7	PF01501	PTHR11183|PTHR11183:SF56
TRINITY_DN10085_c0_g1_i23	566.06	524.09	521.426	530.966	562.974	630.851	797.756	729.388	451.68	429.264	467.672	416.98	675.062	559.225	310.94	AT1G77130	Q8W4A7	PF01501	PTHR11183|PTHR11183:SF56
TRINITY_DN10086_c0_g1_i11	157.76	148.663	346.241	253.55	0	0	25.586	0	0	0	82.745	0	1.983	0	0	AT3G18670	Q9EP71	PF12796|PF13961|PF13962	PTHR24177:SF329|PTHR24177
TRINITY_DN10086_c0_g1_i2	0	0	0	0	0	0	0	148.64	46.422	93.941	0	31.177	0	0	0	AT5G04700	Q9EP71	PF12796|PF13961	PTHR23206:SF4|PTHR23206
TRINITY_DN10086_c0_g1_i3	0	0	0	0	0	0	0	281.969	220.454	153.904	398.302	113.417	192.011	587.825	88.607	AT5G04700	Q9EP71	PF13961|PF12796	PTHR23206|PTHR23206:SF4
TRINITY_DN10086_c0_g1_i5	300.24	183.337	270.724	282.45	461.127	297	316.414	265.191	178.798	149.155	382.956	120.405	359.006	674.175	62.393	AT3G18670	Q9EP71	PF12796|PF13961|PF13962	PTHR24177:SF329|PTHR24177
TRINITY_DN100870_c0_g1_i1	0	0	0	3	0	0	0	0	8	0	25	1	0	0	0		O13941	PF03935	PTHR31361:SF14|PTHR31361
TRINITY_DN10089_c0_g1_i1	3	7	0	9	31	18	45	9	9	0	3	17	14	18	40	AT4G20050	O49432	PF12708	PTHR33928:SF7|PTHR33928
TRINITY_DN10089_c0_g2_i2	1	0	0	0	0	0	0	1.663	3.479	0	0	1	3.333	0	0	AT4G20050	O49432		PTHR33928|PTHR33928:SF7
TRINITY_DN10089_c0_g2_i3	0	2	8	3	29	30	10	31.337	35.521	9	10	9	13.667	3	23	AT4G20050	O49432	PF12708	PTHR33928:SF7|PTHR33928
TRINITY_DN1008_c0_g1_i1	2955.41	1285.87	4260.18	6246.27	110.674	108.798	153.537	3448.97	1232.75	2173.72	3223.1	457.065	171.868	112.754	422.121	AT5G57050	Q0JLP9	PF00481	PTHR47992:SF8|PTHR47992
TRINITY_DN1008_c0_g1_i3	365.729	178.396	494.818	838.847	25.326	16.202	15.463	347.037	125.333	295.162	377.002	61.935	15.132	19.246	33.879	AT5G57050	O04719	PF00481	PTHR47992:SF41|PTHR47992
TRINITY_DN1008_c0_g1_i5	142.359	63.153	281.518	507.394	11.348	15.218	19.821	3.766	10.825	10.749	6.034	6.242	0	0	4.632	AT5G57050	O04719	PF00481	PTHR47992|PTHR47992:SF41
TRINITY_DN1008_c0_g1_i6	689.669	421.354	1129.47	2362.97	58.652	61.782	105.179	1102.28	390.175	1233.25	1892.97	357.758	114	93	161.368	AT5G57050	O04719	PF00481	PTHR47992|PTHR47992:SF8
TRINITY_DN10090_c0_g1_i5	527	470.882	586.997	498	1120.68	308.73	1491.27	315.997	178.999	276.117	296.586	300.481	139.807	520	122
TRINITY_DN100929_c0_g1_i2	2	1	4	0	0	0	0	0	0	2	0	0	0	0	0			PF10528
TRINITY_DN10092_c0_g3_i4	2	1	10	13.665	4	4	8	23	13	4	12	2	7	18	4	AT4G23160	Q94HW2	PF07727	PTHR45895
TRINITY_DN100955_c0_g1_i2	0	0	8	0	0	0	0	100	0	10	0	0	1	0	0	AT1G12570	Q5GMY3	PF05199|PF00732	PTHR11552|PTHR11552:SF218
TRINITY_DN10095_c0_g1_i1	122	169	126	150	214	205.982	248.002	249	196.208	275	209	290	266.985	277	228	AT3G01360		PF04819	PTHR46285|PTHR46285:SF7
TRINITY_DN10097_c0_g1_i5	31	27	44.985	42.326	83.025	126	38	128.951	53	61.974	58.06	45	61	74.017	95	AT3G14240	Q9LUM3	PF05922	PTHR10795:SF676|PTHR10795
TRINITY_DN10097_c2_g1_i1	44	155.95	45	16	635.591	364.295	271	82.1	195	91	13	586.717	844.089	320	833.476	AT5G67360	O65351	PF17766	PTHR10795:SF388|PTHR10795
TRINITY_DN10099_c0_g1_i1	616.97	471.614	762.38	591.578	2046.08	1146.49	803.371	862.579	697.826	636.334	643	980.675	2073.72	1313.77	1273.83	AT1G13450	Q9FX53	PF13837	PTHR21654:SF54|PTHR21654
TRINITY_DN10099_c0_g1_i2	157.339	73.469	149.133	164.788	114.415	77.945	130.321	6.862	15.216	0	0	16.543	77.089	71.155	49.645	AT1G13450	Q9FX53	PF13837	PTHR21654:SF54|PTHR21654
TRINITY_DN10099_c0_g1_i3	541.626	276.975	424.487	466.633	534.244	387.004	377.308	659.53	538.507	505	636	505.343	794.189	665.073	588.302	AT1G13450	Q9FX53	PF13837	PTHR21654|PTHR21654:SF54
TRINITY_DN100_c0_g1_i1	528.493	291.629	362.066	518.517	585.237	580.357	181.005	591.154	368.172	310.179	202.518	211.895	512.259	597.889	314.804	AT5G08390	F4KB17	PF13925|PF00400|PF00400|PF00400|PF00400|PF00400	PTHR19845:SF0|PTHR19845
TRINITY_DN100_c0_g1_i6	498.23	361.371	365.9	451.465	618.044	482.533	529.995	503.846	303.121	445.813	572.483	449.103	572.741	770.115	355.054	AT5G23430	Q8H0T9	PF13925|PF00400|PF00400|PF00400|PF00400|PF00400	PTHR19845:SF0|PTHR19845
TRINITY_DN100_c1_g1_i2	24	32.403	51	18.002	56.819	35.307	26.998	54.414	53.379	32.736	33.584	28.393	68.317	80.276	42.219	AT1G11160	F4HTH8	PF13925	PTHR19845|PTHR19845:SF15
TRINITY_DN100_c1_g1_i3	241.884	209.372	219.394	241.449	239.441	288.549	219.137	446.138	283.192	367.559	255.779	250.968	373.243	512.86	185.996	AT1G11160	A0A1P8AW69	PF13925	PTHR19845:SF15|PTHR19845
TRINITY_DN100_c1_g1_i4	57.398	62.109	68.75	62.645	68.908	99.521	78.421	5.798	0	18.107	5.425	6.492	8.174	11.903	2.427
TRINITY_DN100_c1_g1_i8	19.047	48.038	11.855	31.055	28.742	88.091	47.441	111.024	96.907	78.785	56.797	65.54	103.583	127.288	61.358	AT1G11160
TRINITY_DN101000_c0_g1_i4	44	23	95	40	39	19	18	50	19	36	36	9	50	72	11
TRINITY_DN10100_c0_g1_i11	21.952	7.548	15.175	24.74	28.519	14.346	0	77.646	44.534	45.822	66.574	34.777	81.426	27.102	16.189	AT4G33170	Q9SIT7	PF13041|PF13041|PF13812|PF01535|PF01535|PF01535	PTHR24015:SF1725|PTHR24015
TRINITY_DN10100_c0_g1_i13	53.076	74.95	12.956	44.234	90.761	115.428	90.52	27.996	13.58	18.123	17.307	23.485	10.723	22.433	36.204	AT3G15130	Q9SIT7	PF01535|PF01535|PF01535|PF13041|PF13041|PF13812	PTHR24015:SF1725|PTHR24015
TRINITY_DN10100_c0_g1_i3	0	0	0	0	0	0	0	0	0	0	14.681	0	0	26.021	0	AT4G33170	Q9SMZ2	PF13041|PF13041|PF13812|PF01535|PF01535|PF01535	PTHR24015|PTHR24015:SF1725
TRINITY_DN10100_c0_g1_i8	0	0	27.661	0	0	27.675	0	0	0	0	0	30.738	0	0	0	AT4G33170	Q9SIT7	PF01535|PF01535|PF01535|PF13041|PF13041|PF13812	PTHR24015:SF1725|PTHR24015
TRINITY_DN10100_c0_g1_i9	20.972	45.502	10.207	37.026	24.72	30.551	37.48	12.358	8.886	19.055	18.438	0	33.852	3.444	27.608	AT4G33170	Q9SIT7	PF13041|PF13041|PF01535|PF01535|PF01535|PF13812	PTHR24015:SF1725|PTHR24015
TRINITY_DN10101_c0_g1_i2	16	35	3	2	20	7	2	7	5	6	1	3	15	13	2	AT1G70090	O04536		PTHR13778|PTHR13778:SF43
TRINITY_DN10101_c0_g1_i3	2849.09	2740.95	2417.43	1997	1980.18	1984.47	1629.91	2373.48	2168	1554.37	2042	1498.81	602	1368	720.594	AT1G70090	O04536	PF01501	PTHR13778|PTHR13778:SF40
TRINITY_DN101029_c0_g1_i1	0.989	1.001	16.807	9.02	0	0	3	17.451	16.183	14.187	14.96	16.22	10.727	8.919	9.526	AT3G21110	P38025	PF01259	PTHR43700:SF3|PTHR43700
TRINITY_DN101029_c0_g1_i3	6.987	2.999	2.193	5.98	4	0	0	38.549	5.817	11.813	27.04	9.78	16.273	20.081	1.475	AT3G21110	P38025	PF01259	PTHR43700:SF3|PTHR43700
TRINITY_DN10102_c0_g1_i3	694.766	1325.22	426.084	342.389	1151.58	1138.88	1247.81	383.409	471.576	1001.07	406.17	1484.06	686.518	769.904	377.241	AT2G19770	Q9M7N0	PF00235	PTHR11604|PTHR11604:SF29
TRINITY_DN10102_c0_g1_i4	69.234	262.443	43.916	45.611	150.115	131.864	230.902	61.591	47.424	397.928	21.83	295.704	23.763	60.096	15.681	AT2G19770	Q9M7N0	PF00235	PTHR11604|PTHR11604:SF29
TRINITY_DN101048_c0_g1_i1	0	1	0	0	2	0	2	0	1	2	0	0	0	0	0	AT5G62180	Q0ZPV7	PF07859	PTHR23024:SF426|PTHR23024
TRINITY_DN10104_c0_g1_i13	6.57	40.547	153.21	70.147	14.754	71.958	49.207	111.3	31.816	46.474	36.228	19.292	67.21	47.126	37.679	AT1G67500	Q766Z3	PF03104|PF00136	PTHR45812
TRINITY_DN10104_c0_g1_i15	343.081	0	0	386.497	0	0	0	0	217.184	0	0	0	0	86.913	162.71	AT1G67500	Q766Z3	PF14260|PF03104|PF00136	PTHR45812
TRINITY_DN10104_c0_g1_i4	116.296	8.184	141.62	94.111	0	0	0	0	0	0	0	70.889	9.784	140.28	38.611	AT1G67500	Q766Z3	PF00136|PF03104	PTHR45812
TRINITY_DN10104_c0_g1_i8	0	230.269	237.857	0	329.246	176.078	233.793	395.7	0	263.526	336.772	121.819	251.006	269.681	0	AT1G67500	Q766Z3	PF14260|PF03104|PF00136	PTHR45812
TRINITY_DN101052_c0_g1_i1	0	0	0	0	0	0	0	13	2	2	2	1	0	1	4
TRINITY_DN101055_c0_g1_i1	1	1	2	3	1	0	0	21	0	1	6	0	0	0	0		Q9UUM7	PF03114	PTHR47174:SF3|PTHR47174
TRINITY_DN10105_c0_g1_i1	0	0	0	0	0	0	0	158.45	118.381	63.966	129.404	102.747	143.144	96.413	50.881	AT1G77550	Q3UDE2	PF03133	PTHR46088
TRINITY_DN10105_c0_g1_i11	3.567	3.461	4.727	16.813	12.713	0	13.226	26.876	32.26	0	27.864	8.725	33.537	34.183	44.75	AT1G77550	Q3UDE2	PF03133	PTHR46088
TRINITY_DN10105_c0_g1_i2	144.193	84.189	173.576	215.612	148.23	70.599	104.419	180.288	58.412	133.892	157.061	136.797	127.321	245.373	101.421	AT1G77550	Q3UDE2		PTHR46088
TRINITY_DN10105_c0_g1_i4	191.24	105.35	232.696	292.576	139.412	81.401	87.356	130.387	69.947	113.142	122.671	65.731	126.998	129.03	74.948	AT1G77550	Q3UDE2	PF03133	PTHR46088
TRINITY_DN101061_c0_g1_i3	2	2	3	4	0	0	0	0	0	1	0	0	0	0	2			PF04828	PTHR33337
TRINITY_DN10106_c0_g1_i11	0	2.347	18.931	21.763	3.492	13.327	9.298	105.541	44.29	90.934	101.209	55.039	84.933	104.503	35.99	AT1G78770	B3DNN5	PF13424	PTHR12558|PTHR12558:SF9
TRINITY_DN10106_c0_g1_i12	26.725	11.69	42.191	18.258	25.75	28.399	6.535	13.602	2.396	0	24.204	26.267	31.919	32.011	16.675	AT1G78770	B3DNN5	PF13424	PTHR12558:SF9|PTHR12558
TRINITY_DN10106_c0_g1_i13	0	3.048	0	5.746	0	0	0	34.219	52.039	50.518	5.199	21.829	9.079	25.791	41.724	AT1G78770	B3DNN5	PF13181	PTHR12558|PTHR12558:SF9
TRINITY_DN10106_c0_g1_i14	862.18	847.697	1104.66	1125.26	1413.16	1176.72	848.098	1395.49	934.39	962.6	979.935	1427.83	1355.88	1401.44	1085.5	AT1G68070	Q8GUU2	PF13639	PTHR45977:SF22|PTHR45977
TRINITY_DN10106_c0_g1_i16	0	0	0	0	0	0	0	0	0	0	0	0	0	0	0	AT1G78770	B3DNN5	PF13181|PF12895	PTHR12558|PTHR12558:SF9
TRINITY_DN10106_c0_g1_i17	202.214	149.699	201.742	305.122	215.231	134.428	231.12	503.448	294.942	324.329	423.87	216.151	269.776	339.915	216.346	AT1G78770	B3DNN5	PF13181|PF13424|PF12895	PTHR12558|PTHR12558:SF9
TRINITY_DN10106_c0_g1_i19	240.554	210.084	223.64	272.322	243.537	221.79	219.314	346.962	289.219	256.19	244.36	338.982	389.679	361.14	265.702	AT1G25210	F4IAW1	PF03331	PTHR33694
TRINITY_DN10106_c0_g1_i23	30.375	23.521	83.593	54.494	17.383	19.332	17.175	64.878	34.724	57.334	48.253	21.418	29.736	53.437	4.135	AT1G25210	F4IAW1	PF03331	PTHR33694
TRINITY_DN101073_c0_g1_i1	0	0	0	5	0	0	0	12	3	1	4	0	0	0	0		Q9USU9	PF03153|PF03153	PTHR12694:SF8|PTHR12694:SF8|PTHR12694|PTHR12694
TRINITY_DN10107_c0_g1_i5	83.299	66.872	99.4	50.222	77.533	97.613	64.735	34	13.895	10.073	8	16	30.411	47.865	2.341				PTHR33463:SF100|PTHR33463|PTHR33463|PTHR33463:SF100
TRINITY_DN10107_c0_g1_i7	6.701	10.128	10.6	9.778	8.511	16.387	3.265	0	12.105	7.927	0	0	8.589	8.135	14.659				PTHR33463:SF100|PTHR33463:SF100|PTHR33463|PTHR33463
TRINITY_DN10108_c0_g1_i1	12.369	12.527	135.305	335.65	0	0	2	61.533	0	7.268	19.83	0	0	0	0
TRINITY_DN10108_c0_g1_i8	5.631	5.473	88.695	190.35	0	1	0	19.467	0	12.732	17.17	0	0	0	0
TRINITY_DN101092_c0_g1_i1	7	12	2	3	95	26	3	12	9	5	1	45	132	2	5	AT2G42800	Q9SJH6	PF13855|PF13855	PTHR48054:SF4|PTHR48054
TRINITY_DN10109_c1_g1_i1	416.185	341.036	125	182	110.075	181.75	160.88	215.153	110	606.827	388.417	247	91	180	39	AT1G68460	Q5GHF7	PF01715|PF01715	PTHR11088:SF65|PTHR11088
TRINITY_DN1010_c0_g1_i1	116.742	101.295	38.297	39.497	124.402	74.802	121.241	6.858	19.762	23.382	14.223	10.357	11.943	24.022	6.274				PTHR34555|PTHR34555:SF1
TRINITY_DN1010_c0_g1_i11	145.924	183.584	85.817	203.402	107.347	77.738	131.629	84.732	61.182	65.542	47.227	59.326	44.766	86.206	38.337				PTHR34555:SF1|PTHR34555
TRINITY_DN1010_c0_g1_i19	418.902	487.34	539.452	409.165	320.048	263.691	349.026	143.176	48.231	121.047	74.593	56.957	87.396	125.835	74.862
TRINITY_DN1010_c0_g1_i23	17.991	21.781	12.433	6.936	12.203	4.894	11.36	53.234	27.825	45.028	27.957	26.36	18.895	53.937	19.527				PTHR34555|PTHR34555:SF1
TRINITY_DN10110_c0_g1_i1	16.127	19.673	74.292	98.944	72.963	40.008	28.318	0	0	0	0	0	0	0	0	AT1G01970	Q9LPC4	PF13812|PF01535|PF01535	PTHR46862:SF3|PTHR46862
TRINITY_DN10110_c0_g1_i2	39.72	0	0	0	0	0	27.579	116.822	48.279	61.988	54.444	56.154	71.792	80.346	82.621	AT1G01970	Q9LPC4	PF01535|PF01535|PF01535|PF01535	PTHR46862|PTHR46862:SF3
TRINITY_DN10110_c0_g1_i4	34.152	27.327	25.708	56.056	22.037	29.992	57.104	36.178	13.721	14.012	4.556	24.846	17.208	6.654	9.379	AT1G01970	Q9LPC4	PF01535|PF01535|PF01535|PF01535	PTHR46862:SF3|PTHR46862
TRINITY_DN10111_c0_g1_i1	14	17	43	50	99	44	11	69	62	32	22	90	196	29	112.223			PF11493	PTHR36370:SF1|PTHR36370
TRINITY_DN10114_c0_g1_i1	22.26	38.435	37.718	42.778	35.85	26.551	15.216	25.278	17.21	17.907	8.853	14.525	38.276	10.133	5.016	AT5G41760	Q654D9	PF04142	PTHR10231:SF43|PTHR10231
TRINITY_DN10114_c0_g1_i10	0	0	0	0	47.741	0	0	0	44.947	2.227	0	17.031	19.907	65.281	22.4	AT5G41760	Q654D9	PF04142	PTHR10231|PTHR10231:SF43
TRINITY_DN10114_c0_g1_i13	7	31.373	3	4.022	96.88	80	85	6.098	12.654	0	4.039	89.226	167.363	129.319	75.573	AT5G41760	Q8LGE9	PF04142	PTHR10231:SF43|PTHR10231
TRINITY_DN10114_c0_g1_i4	213.436	132.192	251.282	312.2	207.539	166.449	234.784	457.648	230.277	250.838	320.108	225.646	348.455	401.548	216.294	AT5G41760	Q8LGE9	PF04142	PTHR10231:SF43|PTHR10231
TRINITY_DN101158_c0_g1_i5	0	0	0	3	0	0	0	31	1	7	8	0	0	0	0		Q9UTR6	PF04488	PTHR31834:SF8|PTHR31834
TRINITY_DN101167_c0_g1_i2	1	2	13	0	0	0	0	22	0	6	0	1	0	0	0		P24919		PTHR12653|PTHR12653:SF0
TRINITY_DN10116_c0_g1_i10	37.814	90.349	104.482	79.64	173.705	149.86	44.982	98.729	61.092	66.437	44.56	57.051	100.017	84.515	77.66		Q84JS6
TRINITY_DN10116_c0_g1_i3	35.186	22.257	14.004	34.36	39.295	39.703	45.018	28.718	15.436	12.258	17.489	16.104	13.33	27.956	13.887		Q84JS6
TRINITY_DN10116_c0_g1_i8	0	1.394	5.062	0	0	0	0	9.553	2.472	1.305	2.951	1.845	1.653	20.529	3.453		Q84JS6
TRINITY_DN10119_c0_g4_i1	7011.09	1186	5571.46	5125	515.052	264	548	1275	1237	2703	1146	586	28	247	47			PF14009	PTHR33052|PTHR33052:SF83
TRINITY_DN1011_c0_g1_i1	196.919	115.331	221.184	265.361	170.617	137.216	78.954	281.041	157.903	174.282	160.882	170.113	160.849	250.487	92.301	AT3G45740	Q9BXW7	PF13344	PTHR14269|PTHR14269:SF41
TRINITY_DN1011_c0_g1_i7	48.949	52.211	95.04	100.658	23.169	12.061	14.009	34.855	25.615	25.255	38.789	12.254	45.469	28.936	1.564	AT3G45740
TRINITY_DN1011_c0_g1_i8	17.701	16.672	22.753	29.19	24.793	30.551	26.315	0	0	0	0	0	0	0	0	AT3G45740	O13899	PF13242	PTHR14269|PTHR14269:SF41
TRINITY_DN1011_c0_g1_i9	63.432	68.786	137.023	84.79	97.42	34.172	27.721	42.105	75.483	10.463	53.33	28.633	59.819	25.427	44.135	AT3G45740	O13899	PF13242	PTHR14269:SF41|PTHR14269
TRINITY_DN1011_c1_g1_i3	276	267.998	189.769	229	76.978	62.001	59.437	332	162	182	234	139	181	129	76	AT5G14450	Q9LIN2	PF00657	PTHR22835:SF510|PTHR22835
TRINITY_DN10120_c0_g1_i1	269	65	116	375	67	59	4	35	11	13	16	28	24	30	39	AT3G11170	P48619	PF00487|PF11960	PTHR32100|PTHR32100:SF52
TRINITY_DN10120_c0_g2_i2	0	0	4	4	7.62	11.332	275.054	11	0	0	0	7	3.46	3.708	126.392	AT5G05580	P48624	PF11960|PF00487	PTHR32100|PTHR32100:SF52
TRINITY_DN10120_c0_g2_i3	0	0	0	0	0	0	25.497	0	5	0	0	0	0	0	0	AT5G05580	P48620	PF11960|PF00487	PTHR32100|PTHR32100:SF52
TRINITY_DN10120_c0_g2_i4	0	0	0	0	0	0	11.784	1	0	0	0	0	2.54	2.292	1.673	AT3G11170	P48619	PF11960	PTHR32100|PTHR32100:SF52
TRINITY_DN10120_c0_g2_i5	0	0	0	0	0	0	14.789	0	0	0	0	0	0	0	9.745	AT3G11170	P48619	PF11960|PF00487	PTHR32100|PTHR32100:SF52
TRINITY_DN10120_c0_g2_i6	11	6	0	0	10.38	3.668	339.46	0	0	0	3	0	0	0	71.19	AT5G05580	P48619	PF11960|PF00487	PTHR32100:SF52|PTHR32100
TRINITY_DN101249_c0_g1_i1	0	1	0	0	0	0	0	3.576	0	0	0	1.708	0	0	3		Q93CA6	PF07364
TRINITY_DN101249_c0_g2_i1	2	0	17	5	2	0	1	5.424	0	5	0	1.292	3	0	0		Q93CA6	PF07364|PF07171
TRINITY_DN101251_c0_g1_i1	16	25	11	4	0	0	0	3	2	1	0	0	0	0	0
TRINITY_DN101260_c0_g2_i1	4	0	2	1	5	8	0	4	3	4	3	1	7	3	5		Q07598	PF02803|PF00108	PTHR18919|PTHR18919:SF83
TRINITY_DN10126_c0_g1_i2	167.342	107.788	155.738	224.136	303.785	226.396	255.64	215.203	112.469	148.275	159.452	145.792	309.137	186.685	202.573	AT1G34360	Q6NLP2	PF05198|PF00707	PTHR10938:SF4|PTHR10938:SF4|PTHR10938|PTHR10938
TRINITY_DN10126_c0_g2_i7	154.658	138.212	209.262	268.86	324.215	289.604	252.36	246.786	172.531	232.725	222.548	229.208	293.863	259.315	246.427	AT1G34360	Q6NLP2	PF05198|PF00707	PTHR10938|PTHR10938:SF4|PTHR10938:SF4|PTHR10938
TRINITY_DN10127_c0_g1_i1	6	0	5	5	4.113	8	12	6	7	3	1	4	2	3	2	AT1G48780			PTHR36757
TRINITY_DN10127_c0_g1_i2	0	11	0	0	5.887	0	0	0	0	0	0	0	0	0	0	AT1G48780			PTHR36757
TRINITY_DN10127_c0_g2_i1	49	19	65	85	32	10	22	99	35	55	29	17	54	21	18	AT1G48780			PTHR36757
TRINITY_DN10128_c0_g1_i2	320	354.193	422	392	395.058	263	382	625	485	381	451	374	379	416	168			PF02151|PF02151	PTHR47191
TRINITY_DN1012_c0_g1_i1	339	420.414	306	420.188	710.894	601.024	568.22	390	329	430.426	418	811.844	691	892	444	AT4G28510	Q9ZNT7	PF01145	PTHR23222|PTHR23222:SF13
TRINITY_DN1012_c0_g1_i7	285.969	573.317	278	393	1606.74	1234.3	1111	368.99	285	311	315	1162.01	1313	1268	683.994	AT1G03860	Q9ZNT7	PF01145	PTHR23222|PTHR23222:SF13
TRINITY_DN10130_c0_g1_i3	48	314.001	146.015	211	1462.58	959.276	2332.62	220.995	129	148	90	585	1396.82	617	832.185	AT4G01470	O82598	PF00230	PTHR45665:SF32|PTHR45665
TRINITY_DN10130_c0_g2_i1	18.793	130	35	32	72.736	27.445	47.79	126.001	194	139	92	107.973	195.227	13.348	67.02	AT3G16240	Q41951	PF00230	PTHR45665|PTHR45665:SF41
TRINITY_DN10130_c0_g2_i2	1.207	0	0	0	11.265	2.555	146.21	0	0	0	0	0	3.773	4.652	0	AT3G16240	Q41951	PF00230	PTHR45665|PTHR45665:SF41
TRINITY_DN101321_c0_g1_i1	0	0	0	0	0	0	0	13	0	0	1	0	0	0	0		A0A2G5I8W0		PTHR34598
TRINITY_DN101357_c0_g1_i1	134	53	41	31	5	1	0	13	0	22	0	0	8	0	0			PF12697	PTHR43139|PTHR43139:SF50
TRINITY_DN101368_c0_g1_i4	106	90	35	117	1	0	0	4	0	0	0	10	0	0	0		Q9P8P4	PF01735	PTHR10728|PTHR10728:SF33
TRINITY_DN10137_c0_g1_i4	187.002	131.759	112.048	214.019	276.534	168.691	94.891	231.381	81.729	150.862	212.28	209.751	221.258	331.124	120.938	AT1G16970	Q9FQ08	PF02735|PF03731	PTHR12604|PTHR12604:SF2
TRINITY_DN10137_c0_g1_i5	4.321	7.032	8.074	12.206	6.03	11.333	16.865	22.558	4.102	6.386	12.898	11.916	17.505	4.869	4.933	AT1G16970	Q9FQ08
TRINITY_DN10137_c0_g1_i8	51.677	63.209	61.878	91.811	28.437	36.99	107.244	80.06	39.169	25.752	67.822	81.333	90.237	77.204	50.129	AT1G16970	Q7F1M0	PF02735|PF02037|PF03730	PTHR12604:SF2|PTHR12604
TRINITY_DN101382_c0_g2_i1	6	0	10	0	2	1	10	1	1	3	2	0	3	0	0			PF07366	PTHR38436
TRINITY_DN10138_c0_g1_i1	101.741	61.288	88.715	106.668	197.414	202.835	73.239	90.465	59.851	100.664	77.369	79.817	189.847	116.76	203.886	AT2G41710	Q8GWK2	PF00847	PTHR32467|PTHR32467:SF138
TRINITY_DN10138_c0_g1_i11	815.707	360.379	727.378	924.038	474.799	427.889	386.311	667.79	304.307	746.941	679.713	296.19	408.36	371.825	418.358	AT2G41710	Q8GWK2		PTHR32467|PTHR32467:SF138
TRINITY_DN10138_c0_g1_i15	4.063	0	0	1.092	20.723	37.288	8.788	0	5.443	0	3.667	5.327	26.419	28.375	31.67	AT2G41710	Q8GWK2		PTHR32467|PTHR32467:SF138
TRINITY_DN10138_c0_g1_i2	0	19.968	6.428	0	136.805	160.319	26.464	16.311	10.042	1.306	4.98	22.171	96.815	9.523	73.579	AT2G41710	Q8GWK2		PTHR32467|PTHR32467:SF138
TRINITY_DN10138_c0_g1_i3	585.875	182.08	407.255	526.921	174.618	155.143	150.875	538.604	246.693	442.219	647.584	166.558	106.46	250.836	84.473	AT2G41710	Q8GWK2	PF00847	PTHR32467|PTHR32467:SF138
TRINITY_DN10138_c0_g1_i5	82.27	63.946	120.224	111.281	73.644	34.535	68.323	188.377	99.018	14.987	250.688	182.938	30.098	125.712	68.187	AT2G41690	O22230	PF00447	PTHR10015:SF285|PTHR10015
TRINITY_DN10138_c0_g2_i1	16	54	2	19	127	117	32	31	52	41	30	109	127	97	72	AT2G41690	O22230	PF00447	PTHR10015:SF285|PTHR10015
TRINITY_DN10138_c1_g1_i1	9	5	9	5	54	40.27	40	24	6	7	10	26	26	53	23.848	AT1G09580	Q6IDL4	PF01105	PTHR22811|PTHR22811:SF127
TRINITY_DN10138_c1_g2_i1	509.201	447.801	562	567.98	762.823	657.049	836	325.039	339.64	327.503	355.203	403.228	514.946	311.747	313.453	AT1G09580	Q6IDL4	PF01105	PTHR22811:SF127|PTHR22811
TRINITY_DN10138_c1_g2_i2	0	0	0	0	0	0	0	423.71	264.36	304.497	309.779	506.543	550.137	520.801	433.54	AT1G09580	Q6IDL4	PF01105	PTHR22811:SF127|PTHR22811
TRINITY_DN1013_c0_g1_i2	667.911	717.274	601.992	568.667	1088.22	1034.8	1157.93	400.713	314.523	414.347	333.064	682.025	702.269	631.171	503.321	AT5G67500	Q9FJX3	PF01459	PTHR11743|PTHR11743:SF53
TRINITY_DN1013_c0_g1_i4	374.054	315.264	370.281	368.873	635.693	580.931	819.717	459.838	327.75	408.84	308.746	622.703	774.844	808.803	532.728	AT5G67500	Q9FJX3	PF01459	PTHR11743:SF53|PTHR11743
TRINITY_DN1013_c0_g1_i8	44.992	91.637	105.727	87.137	110.397	157.551	149.028	148.449	132.727	232.813	157.191	184.272	279.887	291.026	149.951	AT5G67500	Q9FJX3	PF01459	PTHR11743|PTHR11743:SF53
TRINITY_DN1013_c1_g1_i1	120	137	132	139	216.758	160	169.02	253	179	222.005	136.719	177	295	235	184	AT3G51470	Q9SD02	PF00481	PTHR13832:SF641|PTHR13832
TRINITY_DN10140_c0_g1_i2	0	0	0	13.497	8.795	11.364	5.079	0	0	3.316	0	0	2.258	0	4.345	AT3G01280	P42056	PF01459	PTHR11743:SF35|PTHR11743
TRINITY_DN10140_c0_g1_i3	12.168	5	10.937	4.127	22.355	21.133	5.921	21	4.883	9.089	3	6.89	3.252	36.075	61.515	AT3G01280	P42056	PF01459	PTHR11743:SF35|PTHR11743
TRINITY_DN10140_c0_g1_i4	0	0	0	0	0	0	0	0	8.117	0	0	6.11	0	16.894	0	AT3G01280	P42056	PF01459	PTHR11743:SF35|PTHR11743
TRINITY_DN10140_c0_g1_i6	7.832	0	4.063	2.376	3.85	11.504	0	0	0	9.595	1	0	13.49	14.03	31.14	AT3G01280	P42056	PF01459	PTHR11743:SF35|PTHR11743
TRINITY_DN101411_c0_g1_i4	0	3.84	0	0	0	3.006	0	0	3.587	0	0	8.224	48.568	2.766	9.113	AT1G29930	P12471		PTHR21649|PTHR21649:SF97
TRINITY_DN10142_c1_g1_i1	0	0	19.459	11	1	0	0	95.999	0	15.902	10.101	0	0	0	0
TRINITY_DN10142_c1_g1_i2	0	0	3.541	0	0	0	0	197.758	1	11.098	5.899	0	0	0	0
TRINITY_DN101431_c0_g2_i1	0	0	0	0	0	0	0	0	15	11	26	0	0	0	0	AT3G12915	Q96X45	PF00679	PTHR42908|PTHR42908:SF28
TRINITY_DN101431_c0_g2_i3	0	2	1	0	0	0	0	0	0	4	0	0	0	0	0	AT3G12915	Q96X45	PF00679	PTHR42908|PTHR42908:SF28
TRINITY_DN101438_c0_g1_i2	2	4	9	12	0	0	0	0	0	0	0	0	0	0	0	AT1G03475	P11353	PF01218	PTHR10755|PTHR10755:SF0
TRINITY_DN101443_c0_g1_i1	236.706	197.026	206.688	220.714	747.522	340.417	712.261	618.283	314.343	472.256	357.322	460.212	506.376	519.096	172.679	AT3G62760	Q9LZI9	PF00043|PF02798	PTHR43900|PTHR43900:SF72
TRINITY_DN101443_c0_g1_i2	12.294	26.974	25.312	42.286	35.461	42.583	14.779	52.717	56.657	116.744	63.678	17.788	38.624	15.338	19.952	AT3G62760	Q9LZI9	PF00043	PTHR43900:SF72|PTHR43900
TRINITY_DN101454_c0_g1_i16	144	141	138	128	70.818	67	53	188	82	122	110.931	105	76	93.004	36.011	AT2G48030		PF03372	PTHR14859:SF10|PTHR14859
TRINITY_DN10145_c0_g1_i1	11.701	17	15	9.003	418.432	412.215	60.721	12.32	0	0	0	0	0	0	0	AT3G22780	Q9LUI3	PF03638|PF03638	PTHR46159:SF15|PTHR46159
TRINITY_DN10145_c0_g1_i2	11.701	17	0	9.003	67.663	0	0	12.32	11.229	0	6	222.521	340.386	260.029	310.816	AT4G14770	Q9LUI3	PF03638|PF03638	PTHR46159:SF15|PTHR46159
TRINITY_DN10145_c0_g1_i6	13.597	0	0	0	296.649	169.421	38.279	18.36	55.771	23	0	52.479	249.614	161.971	161.184	AT4G14770	F4JIF5	PF03638|PF03638	PTHR46159:SF15|PTHR46159
TRINITY_DN10145_c1_g1_i1	645.013	444.626	482	399.397	93	127.002	133	558	422	616	276	262	215	189	97	AT3G10910	Q9SG96	PF13639	PTHR45798:SF44|PTHR45798
TRINITY_DN10146_c0_g1_i1	8.584	0	0	0	16.178	2.881	39.722	0	4.102	0	0	0	12.232	0	0	AT5G41470			PTHR33698|PTHR33698:SF1
TRINITY_DN10146_c0_g1_i4	16.416	30	25	17	31.822	16.119	27.278	28	25.898	31	32	30	2.768	12	15	AT5G41470			PTHR33698|PTHR33698:SF1
TRINITY_DN10147_c0_g1_i1	15	15	38	21	33	28	44	19	12	10	9	13	36	78	17			PF03478	PTHR33127|PTHR33127:SF35
TRINITY_DN101486_c0_g1_i1	4	0	11	0	0	0	0	1	0	2	0	0	0	0	0		Q10088	PF00491	PTHR11358:SF30|PTHR11358
TRINITY_DN101487_c0_g1_i1	0	1	0	0	0	0	17	0	2	8	1	0	0	3	0		P22364	PF13473	PTHR36507
TRINITY_DN10149_c0_g1_i4	124.229	197.997	127.953	84	231.955	279	619.296	73.998	109.721	125.753	113.006	227	91.998	192.527	127.747	AT1G19110			PTHR46503:SF1|PTHR46503
TRINITY_DN1014_c0_g1_i10	508.994	558.272	582.019	492.643	346.197	446.442	424.635	757.702	478.866	825.023	555.362	548.817	422.174	553.965	652.124	AT1G19450	Q8IUS5	PF00561	PTHR43139:SF53|PTHR43139
TRINITY_DN1014_c0_g1_i2	290.638	297.513	376.339	257.606	99.274	142.258	194.159	542.261	292.5	498.561	395.796	400.203	185.001	171.209	292.757	AT1G19450	Q92383	PF00730	PTHR43003|PTHR43003:SF8
TRINITY_DN1014_c0_g1_i4	310.879	429.844	437.622	272.064	222.127	301.603	213.341	378.078	444.33	430.044	236.494	256.883	259.187	295.199	201.599	AT1G75220	Q9FRL3	PF00083	PTHR48021:SF23|PTHR48021
TRINITY_DN1014_c0_g1_i5	101.782	223.864	153.915	119.13	108.879	102.534	113.269	129.076	170.593	158.178	88.708	143.482	92.027	112.173	116.771	AT1G19450	Q92383	PF00730	PTHR43003:SF8|PTHR43003
TRINITY_DN1014_c0_g1_i8	80.784	45.591	45.922	39.358	38.41	60.649	78.036	59.891	32.949	40.551	36.919	37.519	49.991	38.721	35.4	AT1G19450	Q92383	PF00730	PTHR43003:SF8|PTHR43003
TRINITY_DN1014_c0_g1_i9	181.746	87.925	175.183	124.648	70.548	136.629	80.56	238.424	107.76	207.619	203.72	109.096	99.621	110.874	274.457	AT1G19450	Q93YP9	PF00083	PTHR48021:SF23|PTHR48021
TRINITY_DN1014_c1_g1_i1	365	548.717	414.013	374.803	436.892	517.703	816.459	307.943	234.269	416.147	367.984	290	134.01	419.004	183	AT1G77290	O80662	PF13410|PF13417	PTHR45374
TRINITY_DN10150_c0_g1_i3	1049.99	612	1275	1416.78	454.312	551.522	669.998	1228.71	707	1100	1165	496	513	674.001	489.001	AT4G33950
TRINITY_DN10150_c1_g1_i1	434.002	405	245	303	728.098	783.068	609	325	359	254	257	289	851	714.004	377.021	AT5G62580	Q6NPR6	PF02985	PTHR31355|PTHR31355:SF8
TRINITY_DN101527_c0_g1_i1	1	2	3.198	2	2	0	4	0	0	0	1	1	3	3	0	AT1G49960
TRINITY_DN10152_c0_g1_i1	142.532	166.722	172.8	154.247	368.647	348.067	279.211	312.933	265.89	205.822	187	207.864	508.54	314.254	313.665	AT1G08700	O64668	PF01080	PTHR10202:SF26|PTHR10202
TRINITY_DN10152_c0_g1_i2	37.604	8.282	42.198	34.352	49.256	93.731	30.737	43.018	11.052	33.22	0	44.932	40.046	44.746	18.508	AT1G08700	O64668	PF01080	PTHR10202|PTHR10202:SF26
TRINITY_DN10153_c0_g1_i1	28.068	19.6	44.793	36.772	58.795	39.713	44.915	119	116	121	121	171	235	159.013	181.575	AT4G37660	O78414	PF00542	PTHR45987|PTHR45987:SF11
TRINITY_DN10153_c0_g1_i2	58.944	64.4	30.208	24.228	92.205	67.291	102.085	0	0	0	0	0	0	0	2.46	AT4G37660	O78414	PF00542	PTHR45987:SF11|PTHR45987
TRINITY_DN10154_c0_g1_i1	112	79	139	135	64.177	38	61	140	100	130	91	79	81	123	68	AT3G07565		PF12579|PF00249	PTHR14000:SF18|PTHR14000
TRINITY_DN10154_c0_g2_i1	765.231	364.051	584.58	727	350.269	237	352	836	522	520.999	697.063	431.66	465	892.994	333	AT3G07565		PF12579	PTHR14000:SF32|PTHR14000
TRINITY_DN10157_c0_g2_i3	12.651	1.545	14.438	25.883	6.254	11.494	22.19	37.894	13.14	14.66	15.707	0	10.999	2.377	5.471	AT3G26890		PF13889	PTHR13199:SF17|PTHR13199
TRINITY_DN10157_c0_g2_i5	183.689	57.455	335.562	437.117	125.743	103.02	146.81	503.106	328.154	153.34	273.293	105	230.001	158.623	133.564	AT3G26890		PF13889	PTHR13199:SF17|PTHR13199
TRINITY_DN10158_c0_g1_i1	7	9	5	0	38	8	3947.11	0	4	0	0	17	29	32	96	AT3G20820	Q00874	PF13516|PF13516|PF08263	PTHR48060|PTHR48060:SF3
TRINITY_DN101598_c0_g1_i1	0	13	0	0	0	0	0	1	27	1	1	0	0	0	0		P78581	PF07519	PTHR33938:SF16|PTHR33938
TRINITY_DN10159_c0_g1_i1	129.38	398.2	92.56	65.972	387.198	297.905	92.682	91.639	251.866	116.542	62.319	574.617	1121.1	439.648	481.897	AT3G29320	P53535	PF00343|PF00343	PTHR11468:SF27|PTHR11468
TRINITY_DN10159_c0_g1_i4	18.593	16.226	4.586	11.579	2.9	13.569	27.218	0	10.053	17.106	22.256	15.53	25.405	28.688	16.111	AT3G29320	P27598	PF00343|PF00343	PTHR11468|PTHR11468:SF27
TRINITY_DN10159_c0_g1_i5	35.158	39.657	43.943	35.82	8.681	28.447	29.721	23.754	24.897	60.209	53.432	20.915	57.586	77.89	62.788	AT3G29320	P27598	PF00343	PTHR11468:SF27|PTHR11468
TRINITY_DN10159_c0_g1_i6	13.043	12.749	7.611	0	11.871	4.775	0	3.986	0	0	0	14.44	13.912	28.219	8.079	AT3G29320	P27598	PF00343|PF00343	PTHR11468|PTHR11468:SF27
TRINITY_DN10159_c0_g1_i7	260.538	257.299	190.391	311.43	77.102	183.764	195.119	79.989	133.668	193.342	256.784	132.006	343.831	314.763	255.048	AT3G29320	P27598	PF00343	PTHR11468|PTHR11468:SF27
TRINITY_DN10159_c0_g1_i9	0	36.532	0	1.995	16.264	14.504	2.638	6.374	16.724	0	0	15.515	63.423	33.205	23.291	AT3G29320	P53535	PF00343|PF00343	PTHR11468:SF27|PTHR11468
TRINITY_DN1015_c0_g1_i6	86151.4	47708.7	68717.3	58708.4	9534.15	21020.6	18594.4	56730.8	42362.1	66752.9	64105.3	27626.4	2239.78	18032.9	5801.55	AT2G40000	O04203	PF07014|PF07231	PTHR34795:SF1|PTHR34795
TRINITY_DN1015_c1_g1_i2	4521.64	3284.26	5545.26	6003.19	1526.3	3197.65	2171.45	5606.67	2589.03	4325.94	4523.48	1712.26	1424.23	1904.28	1012.8	AT3G06670	Q5SP90	PF04802	PTHR23318|PTHR23318:SF24
TRINITY_DN1015_c1_g1_i3	1506.93	857.035	1694.68	2199.17	437.351	818.093	481.456	2086.07	574.945	1101.13	1621.22	415.104	268.407	501.361	203.378	AT3G06670	Q6INN7	PF04802	PTHR23318:SF22|PTHR23318
TRINITY_DN1015_c1_g1_i6	2130.87	1712.13	2237.45	2621.46	1417.34	1609.15	1718.14	1794.51	1248.71	1409.55	1549.98	1021.89	1415.61	1552.79	985.608	AT3G06670	Q5SP90	PF04802	PTHR23318:SF24|PTHR23318
TRINITY_DN1015_c2_g1_i11	144.818	345.511	175.107	120.462	94.131	450.835	38.535	40.059	47.333	19.193	22.36	47.199	67.163	61.257	22.601	AT1G48175	Q6IDB6
TRINITY_DN1015_c2_g1_i12	23.409	3.622	4.295	0	10.911	2.377	4.659	7.353	8.388	0	6.078	6.679	4.936	29.448	13.078
TRINITY_DN1015_c2_g1_i13	133.671	348.31	213.668	247.273	156.076	369.231	106.807	150.115	130.279	117.624	89.563	144.123	198.891	153.162	143.429	AT1G48175	Q6IDB6
TRINITY_DN1015_c2_g1_i3	13.291	11.293	18.93	24.265	3.227	17.798	0	1.473	0	4.183	0	0	10.01	8.133	6.892	AT1G48175
TRINITY_DN1015_c3_g1_i2	588.088	762.308	773.336	777.508	684.793	674.346	1012.29	1657.6	1131.15	1135.28	1128.44	778.37	801.21	1418.99	539.461	AT4G16440	Q94CL6	PF02256|PF02906	PTHR11615|PTHR11615:SF258
TRINITY_DN101609_c0_g1_i1	0	0	0	0	0	0	0	9	1	0	0	0	0	0	0	AT3G09820	O49923		PTHR45769:SF3|PTHR45769
TRINITY_DN101609_c0_g1_i3	0	4	9	20	0	0	0	3	0	4	5	1	0	0	0	AT3G09820	P47143	PF00294	PTHR45769
TRINITY_DN101609_c0_g2_i1	3.182	2.213	1.626	0	0	0	0	0	0	0	0	0	0	0	0	AT5G03300	P78825	PF00294	PTHR45769|PTHR45769:SF3
TRINITY_DN101609_c0_g2_i3	29.818	52.787	15.374	14.888	0	0	0	0	0	4	0	1	0	0	0	AT5G03300	P78825	PF00294	PTHR45769:SF3|PTHR45769
TRINITY_DN10161_c0_g1_i1	72.567	27.557	57.753	72.654	0	4.389	0	454.953	291.343	345.109	688.429	275.499	170.349	35.235	161.842	AT2G36690	Q6Z244	PF14226|PF03171	PTHR47990|PTHR47990:SF47
TRINITY_DN10161_c0_g1_i2	119.433	31.443	61.247	353.36	5	14.611	84	63.572	64.657	69.891	313.571	102.501	11.651	32.765	34.21	AT4G10490	Q6Z244	PF03171	PTHR47990:SF47|PTHR47990
TRINITY_DN101623_c0_g1_i1	0	0	0	2	3	0	1	1	2	0	4	0	0	0	0	AT1G67550	Q89UG3	PF00547	PTHR33569
TRINITY_DN101625_c0_g1_i5	111.583	82.01	253.597	238.118	110.854	63.593	82.307	171.999	75	90.004	99.438	77	100.002	157.369	58.956
TRINITY_DN101626_c0_g1_i2	0	13	0	0	7	0	29	0	2	0	0	1	0	10	43	AT4G05120	Q9M0Y3	PF01733	PTHR10332|PTHR10332|PTHR10332:SF30|PTHR10332:SF30
TRINITY_DN10162_c0_g1_i4	5	4	0	0	9	24	2	44	29	20	7	31	212.169	86	33		V9M2S5
TRINITY_DN101636_c0_g1_i7	0	0	0	7.817	0	0	0	18.935	0	1.581	13.567	0	0	0	0	AT2G26140	P32795	PF17862|PF01434|PF00004	PTHR23076|PTHR23076:SF97
TRINITY_DN101636_c0_g1_i8	0	0	3	1.214	0	0	0	10.865	1	6.419	6.748	0	0	0	0	AT2G26140	P32795	PF17862|PF01434|PF00004	PTHR23076:SF97|PTHR23076
TRINITY_DN101636_c0_g1_i9	0	0	0	9	0	0	0	19.201	0	0	17.685	2	0	0	0	AT2G26140	P32795	PF17862|PF00004|PF01434	PTHR23076:SF97|PTHR23076
TRINITY_DN101645_c1_g1_i1	0	2	0	0	0	1	4	0	0	0	0	0	0	0	0
TRINITY_DN101651_c0_g1_i1	2	0	0	0	0	1	5	1	0	0	0	1	0	2	2
TRINITY_DN101656_c0_g1_i1	0	0	0	6	0	0	0	10	0	2	7	0	0	0	2			PF07019	PTHR20994:SF0|PTHR20994
TRINITY_DN101657_c0_g1_i4	0	0	0	4	0	0	0	18	0	2	6	0	0	0	0	AT1G17990	I1RV17	PF00724	PTHR43303:SF7|PTHR43303
TRINITY_DN10165_c0_g1_i1	2009.22	2113.43	2226.39	1629.88	964.909	764.185	992.406	2215.09	1829.82	1992.56	1509.71	1244.9	1148.14	1092.48	1325.99	AT1G08630	Q8RXU4	PF01212	PTHR48097|PTHR48097:SF4
TRINITY_DN10165_c0_g1_i11	137.85	150.142	176.967	211.398	125.71	110.544	118.068	359.756	275.16	371.147	253.647	156.989	144.29	119.98	226.646	AT1G08630	Q8RXU4	PF01212	PTHR48097:SF4|PTHR48097
TRINITY_DN10165_c0_g1_i4	92.684	115.381	206.103	75.725	86.78	80.413	81.531	152.728	121.017	95.295	97.651	64.834	116.221	60.128	106.289	AT1G08630	Q8RXU4	PF01212	PTHR48097:SF4|PTHR48097
TRINITY_DN10167_c0_g2_i3	0	9.995	45.825	1.079	115.587	21.914	70	57.212	45.841	47.716	11	18.164	133.871	63.701	84.75	AT4G00770			PTHR33623:SF17|PTHR33623
TRINITY_DN10167_c0_g2_i4	1	10.005	15.175	7.921	18.413	13.086	0	2.788	18.159	19.284	0	41.836	58.129	20.299	63.25	AT4G00770			PTHR33623|PTHR33623:SF17
TRINITY_DN101680_c0_g1_i14	0	5	67	84	0	0	0	48	0	1	15	1	0	0	0
TRINITY_DN101682_c0_g1_i1	188.172	151	102	118	10	0	1	24	0	11	0	3	6	0	0		Q9UW81	PF01036	PTHR28286:SF2|PTHR28286
TRINITY_DN101684_c0_g1_i1	0	1	14	10	0	1	0	1	0	5	0	0	0	0	0
TRINITY_DN10169_c0_g1_i3	0	46.747	0	0	61.68	138.763	0	59.714	61.892	35.865	31.985	81.467	101.126	94.943	82.979	AT3G18240	Q03976	PF10213	PTHR13490
TRINITY_DN10169_c0_g1_i4	17.358	0	81.223	53.817	0	0	133.576	0	0	0	0	0	0	0	0	AT3G18240		PF10213	PTHR13490
TRINITY_DN10169_c0_g1_i7	115.557	76.259	138.674	115.199	155.617	159.655	39.311	0	0	0	0	0	0	0	0	AT3G18240		PF10213	PTHR13490
TRINITY_DN10169_c0_g1_i9	86.085	36.137	55.103	40.984	159.745	31.582	135.113	177.286	149.494	147.136	97.015	163.533	285.874	236.057	182.99	AT3G18240		PF10213	PTHR13490
TRINITY_DN1016_c0_g1_i2	4214.02	3405.38	4168.8	4135.02	3146.87	5856.3	4134.28	4602.37	2750.76	3126.89	3031.95	2452.02	3588.47	4085.09	2309.16	AT3G07160	Q9SFU6	PF02364	PTHR12741|PTHR12741:SF88
TRINITY_DN1016_c0_g1_i3	298.002	575.135	469.231	414.619	383.428	457.022	456.072	528.189	195.555	277.134	456.048	213.427	332.155	464.665	132.206	AT3G07160	Q9SFU6	PF02364	PTHR12741|PTHR12741:SF88
TRINITY_DN1016_c0_g2_i3	271.919	344.35	380	58.281	159.819	180.989	366.597	234.912	219.483	404.51	164.478	255.59	467.074	153.394	381.682	AT4G04970	Q9S9U0	PF14288|PF02364	PTHR12741|PTHR12741:SF77
TRINITY_DN1016_c0_g2_i4	174.081	192.65	0	517.719	619.95	987.975	521.211	378.079	164.517	136.478	219.522	189.374	531.467	615.606	363.318	AT4G04970	Q9S9U0	PF02364|PF14288	PTHR12741:SF77|PTHR12741
TRINITY_DN1016_c0_g2_i6	60	162	113	32	61	28	9	1	0	0	0	0	0	0	0	AT4G03550	Q9S9U0	PF14288	PTHR12741:SF82|PTHR12741
TRINITY_DN10170_c0_g1_i10	32	123.748	10	23.012	3	0	0	7	0	1.105	0	1.336	1	0	0	AT1G14520	Q4V8T0	PF05153	PTHR12588:SF0|PTHR12588
TRINITY_DN10170_c0_g1_i11	0	14.214	0	0	0	0	0	1.562	1	0	0	0	0	6	0	AT1G14520	Q8L799	PF05153	PTHR12588|PTHR12588:SF0
TRINITY_DN10170_c0_g1_i19	0	5.067	2	10.988	0	0	0	10.438	0	5.895	6	4.664	0	0	5	AT1G14520	Q8L799	PF05153	PTHR12588|PTHR12588:SF0
TRINITY_DN10170_c0_g1_i3	1	19.971	34	16	0	0	0	27	0	7	3	0	0	6	6	AT1G14520	Q8L799	PF05153	PTHR12588:SF0|PTHR12588
TRINITY_DN10171_c0_g1_i1	9.019	3.752	0	0	0	0	56.064	0	3.979	17.712	0	11.155	0	0	0	AT1G45616	Q9C637	PF08263|PF00560|PF13855|PF13855|PF13855	PTHR48061:SF2|PTHR48061|PTHR48061|PTHR48061:SF2
TRINITY_DN10171_c0_g1_i4	0	64.248	0	0	0	0	6.133	57.886	44.021	40.288	42.293	33.845	18	3.998	0	AT1G45616	Q9C637	PF08263|PF00560|PF13855|PF13855|PF13855	PTHR48061:SF2|PTHR48061|PTHR48061:SF2|PTHR48061
TRINITY_DN10171_c0_g1_i5	24.981	0	29	28	16.595	60.78	52.803	0	0	0	0	0	0	0	33.15	AT1G45616	Q9C699	PF13855|PF13855|PF13855|PF08263|PF00560	PTHR48061|PTHR48061:SF2|PTHR48061:SF2|PTHR48061
TRINITY_DN10171_c0_g1_i9	0	0	0	0	3.405	7.224	0	12.114	0	0	1.707	0	0	10.002	17.85	AT1G45616	Q9C699	PF13855|PF13855|PF13855|PF08263|PF00560	PTHR48061|PTHR48061:SF2|PTHR48061|PTHR48061:SF2
TRINITY_DN10172_c0_g1_i3	405.304	205.687	281.961	575.687	224.343	184.148	125.094	679.869	252.472	450.299	582.107	302.381	294.513	272.004	533.778	AT5G59050			PTHR33356|PTHR33356:SF16
TRINITY_DN10172_c0_g1_i4	41.742	33.312	73.039	77.313	20.056	30.209	19.906	149.131	61.528	161.701	120.038	46.709	90.406	152.996	52.222	AT5G59050			PTHR33356:SF16|PTHR33356
TRINITY_DN10172_c0_g2_i1	28.322	70	112.082	122.141	124.145	61.229	78.061	139.564	103.791	303.282	119.106	148.811	153.297	136.964	120.114	AT5G59050			PTHR33356|PTHR33356:SF16
TRINITY_DN10172_c0_g2_i3	1060.62	874.447	1335.92	1599.4	1248.75	863.007	559.819	1352.26	1060.45	1045.72	1034.28	1080.33	1072.5	915.223	959.888	AT5G59050			PTHR33356|PTHR33356:SF16
TRINITY_DN10172_c1_g1_i1	127.908	83.031	233.103	408.895	42.392	115.46	101.291	433.703	184.554	256.884	131.976	0	106.567	74.505	15.418	AT4G13750	F4JTS8		PTHR32387|PTHR32387:SF0
TRINITY_DN10172_c1_g1_i2	889.987	480.277	778.952	1116.15	550.632	649.294	567.709	1196.42	698.446	688.121	1223.01	648	815.559	909.973	673.583	AT4G13750	F4JTS8	PF13020	PTHR32387:SF0|PTHR32387
TRINITY_DN101739_c0_g1_i1	1	0	0	20	0	0	1	25	2	8.009	5	0	0	0	6	AT2G46320	Q6DHC3	PF00153|PF00153|PF00153|PF00153	PTHR45760:SF2|PTHR45760
TRINITY_DN101752_c0_g1_i1	0	0	0	0	0	0	0	1	0	9	10.995	0	0	0	0
TRINITY_DN101752_c0_g1_i3	0	0	9	1	0	0	0	0	17	0	58.005	0	0	0	0
TRINITY_DN10175_c0_g1_i4	2709.66	3671.45	2263.59	2458.4	4404.77	4174.23	3320.83	2903.45	3071.89	3147.05	2808.07	3758.92	6109.08	4414.71	5184.98	AT2G17390	Q29Q26	PF17830|PF12796	PTHR24203|PTHR24203:SF58
TRINITY_DN10175_c0_g1_i5	21.311	27.16	48.446	50.596	41.186	34.444	18.138	43.092	35.84	18.8	45.771	23.551	32.374	26.24	25.557	AT2G17390	Q29Q26	PF17830	PTHR24203:SF58|PTHR24203
TRINITY_DN10176_c0_g3_i2	0.5	0	1	0	8.452	30.437	383.7	0	0	0	0	62.556	52.381	431.718	121.391	AT4G13710	Q944R1	PF00544	PTHR31683|PTHR31683:SF81
TRINITY_DN10176_c0_g3_i3	0	3	0	0	34.683	35.053	95.685	0	9	0	0	5.444	8.619	93.657	11.609	AT4G13710	Q944R1	PF00544	PTHR31683:SF81|PTHR31683
TRINITY_DN10176_c0_g3_i4	0.5	0	0	0	23.865	10.51	161.616	0	0	0	0	0	0	0	0	AT4G13710	Q944R1	PF00544	PTHR31683|PTHR31683:SF81
TRINITY_DN10177_c0_g1_i1	15.389	3.536	3.297	4.386	20.247	12.028	10.764	4.547	10.307	16.694	1.467	16.126	79.387	49.124	16.162
TRINITY_DN10177_c0_g1_i11	45.309	37.65	116.416	85.502	43.953	57.623	31.542	72.725	55.647	33.962	39.35	82.689	197.884	145.664	66.826
TRINITY_DN10177_c0_g1_i4	30.677	42.014	62.326	7.409	22.612	22.538	28.296	15.849	18.21	18.985	7.183	27.886	6.577	32.326	4.599
TRINITY_DN10177_c0_g1_i6	39.022	21.8	31.961	50.704	73.189	48.81	52.398	9.879	8.838	14.359	0	13.298	19.151	24.194	13.413
TRINITY_DN101781_c0_g1_i2	0	0	0	2	0	0	0	5	0	0	0	0	0	0	1		O42622	PF01204	PTHR23403|PTHR23403:SF6
TRINITY_DN101782_c0_g1_i1	0	0	4	0	0	0	0	9	0	0	4	0	0	0	0	AT1G09400	Q6UEF0	PF00724	PTHR43656|PTHR43656:SF5
TRINITY_DN10178_c0_g1_i12	618.985	311.798	616.824	570.131	390.332	334.602	293.176	651.939	308.253	396.647	636.056	283.654	146.749	397.45	168.737				PTHR35281|PTHR35281:SF4
TRINITY_DN10178_c0_g1_i14	245.074	350.927	268.273	185.621	224.306	309.952	231.127	79.12	35.169	41.731	51.086	100.052	78.342	132.746	122.385	AT3G14470	Q9LRR4	PF18052	PTHR23155|PTHR23155:SF1132
TRINITY_DN10178_c0_g1_i15	180.043	178.456	227.556	181.862	346.731	112.474	172.355	134.053	67.137	95.152	148.805	89.662	106.108	183.175	21.46				PTHR35281|PTHR35281:SF4
TRINITY_DN10178_c0_g1_i16	0	3.499	0	0	0	0	0	0	0	0	0	0	0	0	0			PF18052
TRINITY_DN10178_c0_g1_i19	242.068	252.538	359.524	282.718	190.95	337.659	356.313	64.341	37.152	49.161	41.852	75.8	37.122	141.31	42.421				PTHR37263
TRINITY_DN10178_c0_g1_i2	744.702	352.95	860.534	874.569	427.413	214.95	422.348	748.002	374.573	420.219	716.092	325.236	197.475	372.52	194.504		Q9LRR5	PF18052
TRINITY_DN101797_c0_g1_i1	0	6	0	2	20	3	14	0	0	0	0	0	0	0	0			PF13456	PTHR33033:SF67|PTHR33033
TRINITY_DN101798_c0_g1_i6	0	3	28	0	0	0	1	17	0	2	0	0	0	0	0	AT3G06050	O14313	PF08534	PTHR10430:SF16|PTHR10430
TRINITY_DN1017_c0_g1_i13	326.363	527.514	382.481	255.554	460.73	436.91	589.666	468.956	506.851	522.841	498.585	912.962	662.65	757.704	440.99	AT1G50670	Q9LPT6	PF02338	PTHR13312:SF0|PTHR13312
TRINITY_DN1017_c0_g1_i14	41.011	27.365	61.908	46.573	31.498	121.3	67.613	120.005	37.069	53.985	56.06	44.951	73.699	66.44	26.827	AT1G50670	Q9LPT6	PF02338	PTHR13312|PTHR13312:SF0
TRINITY_DN1017_c0_g1_i17	67.501	40.928	49.295	157.465	43.319	104.429	28.953	142.786	42.156	75.406	49.564	0	42.392	101.388	62.327	AT1G50670
TRINITY_DN1017_c0_g1_i23	0	59.024	15.038	0	0	39.676	39.97	26.751	62.462	62.99	120.701	64.585	61.642	0	0	AT1G50670
TRINITY_DN1017_c0_g1_i31	324.989	414.891	323.283	377.427	729.545	495.483	681.101	532.17	562.952	430.01	458.94	737.049	982.814	922.158	611.233	AT1G50670	Q9LPT6	PF02338	PTHR13312|PTHR13312:SF0
TRINITY_DN1017_c0_g1_i6	0	31.532	0	19.107	0	22.953	0	9.793	24.834	14.696	6.151	11.41	2.491	34.325	8.429	AT1G50670	Q9LPT6		PTHR13312|PTHR13312:SF0
TRINITY_DN1017_c0_g1_i8	13.135	0	37.176	21.874	10.053	9.646	32.404	110.715	54.697	8.668	0	22.043	12.791	46.584	37.254	AT1G50670	Q9LPT6	PF02338	PTHR13312|PTHR13312:SF0
TRINITY_DN101801_c1_g1_i12	1	6	42.675	23.729	0	0	0	0	0	4.292	2	0	0	0	0	AT4G09000	B8NLM9	PF00244	PTHR18860:SF39|PTHR18860
TRINITY_DN101801_c1_g1_i3	0	0	1.264	0.993	0	0	0	2	13	5.709	10.54	0	0	0	0	AT4G09000	B8NLM9	PF00244	PTHR18860|PTHR18860:SF39
TRINITY_DN101801_c1_g1_i6	0	14	15.547	31.278	0	0	0	17.061	0	4	10	0	0	0	0	AT4G09000	B8NLM9	PF00244	PTHR18860:SF39|PTHR18860
TRINITY_DN101801_c1_g1_i9	4	0	11.513	0	0	0	0	0.939	10	15.999	7.46	0	1	0	0	AT4G09000	B8NLM9	PF00244	PTHR18860:SF39|PTHR18860
TRINITY_DN10180_c0_g1_i1	0	7	32	154	0	0	0	8	3	12	17	1	0	0	0	AT1G77940	Q7S7F1	PF01248	PTHR11449
TRINITY_DN10180_c0_g1_i2	0	3	13	8	0	0	0	50	0	54	18	0	0	2	0	AT1G36240	Q7S7F1	PF01248	PTHR11449
TRINITY_DN10181_c0_g1_i1	155.7	76.494	107.699	188.854	92.697	60.486	28.398	343.959	66.11	182.937	141.514	46.12	71.224	81.254	23.714	AT3G59100	Q9LYS6	PF14288|PF04652	PTHR12741|PTHR12741:SF55
TRINITY_DN10181_c0_g1_i4	135.059	101.422	226.405	180.831	138.932	153.656	193.602	139.795	55.905	11.288	140.261	80.828	79.442	125.914	103.246	AT3G59100	Q9LYS6	PF04652|PF14288|PF02364	PTHR12741:SF55|PTHR12741
TRINITY_DN10181_c0_g1_i6	5.241	0	5.896	10.316	1.371	5.857	0	15.349	1.985	4.774	1.224	3.051	20.335	25.831	10.039	AT3G59100	Q9LYS6	PF14288|PF04652	PTHR12741:SF58|PTHR12741
TRINITY_DN101827_c0_g1_i8	0	0	9.086	15.886	0	0	0	2	0	2	1	0	0	0	0			PF13881	PTHR13169|PTHR13169:SF0
TRINITY_DN101827_c0_g1_i9	0	0	13.914	19.114	0	1	0	2	0	1	2	0	0	0	0			PF13881	PTHR13169|PTHR13169:SF0
TRINITY_DN10182_c0_g1_i10	12.992	31.404	15.686	20.506	29.667	23.274	15.442	0	0	0	0	0	0	0	0
TRINITY_DN10182_c0_g1_i12	649.965	793.38	332.296	451.254	424.901	408.726	440.619	0	4.009	0	1	0	0	0	1
TRINITY_DN10182_c0_g1_i16	159	126.649	215	128.986	29	70.123	26.001	13	5.013	15	4	3	1	0	0	AT4G04650		PF13966	PTHR33116|PTHR33116:SF40
TRINITY_DN10182_c0_g1_i3	38.975	59.519	5.672	30.425	29.12	22.149	27.691	0	0	0	0	0	0	0	0
TRINITY_DN10182_c0_g1_i4	61.068	148.147	203.346	177.943	80.312	74.984	83.505	0	0	0	0	0	1	0	0
TRINITY_DN10182_c1_g4_i1	0	2	4	1	2	1	0	25	7	9	23	3	10	17	6
TRINITY_DN10185_c0_g2_i2	22.161	12.203	12.486	19.974	21.978	20.129	22.796	35.567	12.694	7.636	18.622	5.067	30.986	55.725	20.703
TRINITY_DN10185_c0_g2_i3	527.077	308.581	673.958	573.854	162.529	159.467	233.887	672.698	431.883	489.55	558.568	222.831	119.562	261.459	172.107	AT1G65030	Q9NWT1		PTHR44675
TRINITY_DN10185_c0_g2_i6	68.937	82.402	124.837	150.347	166.037	149.368	164.101	161.216	77.658	90.825	91.843	116.303	158.922	206.09	111.848	AT4G18400			PTHR37242
TRINITY_DN10185_c0_g2_i7	12.775	3.917	7.123	8.227	5.422	5.036	10.72	54.274	20.872	9.759	21.443	15.283	26.42	10.798	4.507
TRINITY_DN10185_c0_g2_i8	12.102	7.954	4.597	22.599	7.472	0	1.495	15.246	11.893	8.23	10.524	6.516	14.13	1.366	5.834	AT1G65030	Q5ZKU8		PTHR44675
TRINITY_DN101870_c0_g1_i3	2	68.667	2.005	2	17.006	21.068	12	2	13	5	1	68.271	19	11	22	AT5G12250	P18025	PF00091	PTHR11588:SF351|PTHR11588
TRINITY_DN101871_c0_g3_i1	2	0	1	3	1	2	6	2	0	2	0	1	0	5	1			PF13763
TRINITY_DN101875_c0_g1_i3	0	0	3	0	0	0	0	10.585	0	3	2	0	0	0	0	AT4G36420	P53163	PF00542|PF16320	PTHR45987:SF4|PTHR45987
TRINITY_DN101875_c0_g1_i5	0	1	0	0	0	0	0	4.415	0	0	0	0	0	0	0	AT4G36420	P53163	PF00542|PF16320	PTHR45987:SF4|PTHR45987
TRINITY_DN10187_c0_g1_i2	139.992	52.733	161.294	137.617	21.974	34.135	56.542	0	0	0	0	0	0	0	0	AT3G28450	Q9LSI9	PF00560|PF00560|PF08263	PTHR45631|PTHR45631:SF14
TRINITY_DN10187_c0_g1_i3	184.435	66.757	78.629	173.505	25.091	23.169	22.629	359.416	215.173	215.573	307.563	142.244	61	67.829	49.024	AT3G28450	Q9LSI9	PF08263|PF00560|PF00560	PTHR45631|PTHR45631:SF14
TRINITY_DN10187_c0_g1_i4	120.573	41.505	51.077	86.878	12.936	25.696	47.829	26.584	35.827	31.427	7.437	8.756	0	17.171	2.976	AT3G28450	Q9LSI9	PF00560|PF00560|PF08263	PTHR45631|PTHR45631:SF14
TRINITY_DN101880_c0_g1_i1	0	0	0	0	0	0	0	50	0	22	0	3	0	0	0		E1VBT6	PF04828	PTHR33337|PTHR33337:SF30
TRINITY_DN10188_c0_g1_i5	0	0	0.5	0	0	0	0.5	0	0	4.471	0	0	0	0.591	0	AT2G24130	Q9ZUI0	PF08263|PF13855|PF13855|PF00560	PTHR48052|PTHR48052:SF2
TRINITY_DN10188_c0_g1_i6	0	0	0.5	0	0	0	0.5	19.088	14.578	4.471	21.521	20.175	13.093	0.591	28.297	AT2G24130	Q9ZUI0	PF08263|PF13855|PF13855|PF13855	PTHR48052:SF2|PTHR48052
TRINITY_DN10188_c0_g2_i1	16.773	3	0	15	43	8	13	92.252	0	22.99	23.479	8.825	24.258	19.914	14.874	AT2G24130	Q9ZUI0	PF13855|PF08263|PF00560|PF00560|PF00069|PF13516	PTHR48052:SF2|PTHR48052
TRINITY_DN10188_c0_g2_i2	0	0	0	0	0	0	0	0	0	0	0	0	0	0	0	AT2G24130	Q9ZUI0	PF08263|PF13855|PF13855|PF13855	PTHR48052:SF2|PTHR48052
TRINITY_DN10188_c0_g2_i5	2.227	0	16	0	0	0	0	14.66	28.422	5.068	0	0	12.649	8.903	2.829	AT2G24130	Q9ZUI0	PF00560|PF00560|PF00069|PF08263|PF13855	PTHR48052|PTHR48052:SF2
TRINITY_DN101893_c0_g1_i1	9	2	12	21	3	5	6	0	1	0	1	6	1	4	1	AT1G19250	Q9LMA1	PF00743	PTHR23023
TRINITY_DN1018_c0_g1_i2	245	214	303.022	263	154	122	327	292.092	180	185.288	265.148	128	142	338	108	AT3G57120	F4IB81	PF00069	PTHR46863|PTHR46863:SF2
TRINITY_DN1018_c0_g1_i3	32	8	42	28	0	0	1	135.764	12	30	85.852	14.022	2	18.148	6	AT3G57120	F4IB81		PTHR46863|PTHR46863:SF2
TRINITY_DN101909_c0_g1_i1	0	1	2	0	2	3	6	1	1	0	0	12	4	0	1				PTHR35111:SF1|PTHR35111
TRINITY_DN10191_c0_g1_i1	22	27	26	20	72.001	51	34	18	27	22	12	30	46	14	16	AT5G03510	Q681X4	PF13912|PF13912	PTHR26374|PTHR26374|PTHR26374:SF381|PTHR26374:SF381
TRINITY_DN10191_c0_g1_i2	0	0	0	0	0	0	0	0	0	0	0	0	0	0	0	AT5G03510	Q681X4	PF13912|PF13912	PTHR26374:SF387|PTHR26374
TRINITY_DN10191_c0_g1_i3	14	10	16	59	48	30	25	10	11	10	4	35	18.928	12	82	AT2G28200	Q681X4	PF13912|PF13912	PTHR26374:SF387|PTHR26374
TRINITY_DN101931_c0_g1_i2	7	27	0	20	0	0	0	0	0	0	0	0	0	0	0	AT5G18210	O67610	PF13561	PTHR42760|PTHR42760:SF95
TRINITY_DN10194_c0_g1_i1	3.907	1.825	10.295	8.477	5.081	35.75	13.501	2.236	17.47	7.604	11.7	11.327	6.648	13.168	3.829	AT5G47020
TRINITY_DN10194_c0_g1_i11	2.839	3.68	1.125	5.126	0	8.011	1.094	2.346	0	0	0	0	1.18	11.189	0	AT5G47020			PTHR31513:SF2|PTHR31513
TRINITY_DN10194_c0_g1_i3	17.682	30.302	3.051	66.563	51.877	57.153	9.879	51.434	54.719	40.879	55.893	0	53.205	27.564	16.437	AT5G47020			PTHR31513|PTHR31513:SF2
TRINITY_DN10194_c0_g1_i4	14.096	23.384	13.659	17.035	7.302	19.373	12.817	30.323	5.763	5.847	6.103	9.214	7.109	21.712	0	AT5G47020			PTHR31513:SF2|PTHR31513
TRINITY_DN10194_c0_g1_i7	286.631	266.81	381.957	433.851	300.59	258.04	261.269	484.507	200.233	217.597	345.467	167.57	293.078	394.038	234.615	AT5G47020			PTHR31513|PTHR31513:SF2
TRINITY_DN10194_c0_g1_i9	57.917	0	89.985	38.948	9.149	181.993	30.44	47.155	21.814	55.073	13.837	38.89	37.018	45.329	40.071	AT5G47020			PTHR31513:SF2|PTHR31513
TRINITY_DN10195_c0_g1_i1	195.169	208	242	230	198	284	283	345.027	256	263	226	190.046	206	279	176	AT1G74410	Q8LBA0	PF13639	PTHR46151|PTHR46151:SF18
TRINITY_DN10196_c0_g1_i1	56.935	75.737	47.194	99.204	102.41	82.982	53.311	79.288	109.245	73.79	72.474	72.823	164.819	145.699	93.226	AT1G33800	Q9T0F7	PF04669	PTHR31444|PTHR31444:SF26
TRINITY_DN10196_c0_g1_i2	10.065	67.263	35.806	32.796	205.59	145.838	118.074	85.712	119.953	30.21	25.526	82.177	170.181	192.301	242.887	AT1G09610	Q9T0F7	PF04669	PTHR31444:SF26|PTHR31444
TRINITY_DN101972_c0_g1_i1	0	0	11	41	0	0	0	0	0	4	0	0	0	0	0	AT5G09830	P39724	PF01722	PTHR46188
TRINITY_DN101972_c0_g1_i6	0	1	0	0	0	0	0	2	0	0	0	0	0	0	0	AT5G09830	P39724	PF01722	PTHR46188
TRINITY_DN101979_c0_g1_i4	2	1	1	0	1.966	6	0	207.381	223.367	115.022	153.956	226.856	427.398	258.91	175.271			PF17067
TRINITY_DN10199_c0_g1_i2	567.353	393.899	681.429	804.823	512.691	474.781	430.821	1061.84	620.161	874.615	797.001	538.079	806.565	794.485	388.727	AT3G02760	F4IYF8	PF03129|PF13393	PTHR11476:SF7|PTHR11476
TRINITY_DN10199_c0_g1_i3	385.932	249.216	508.18	660.211	463.061	402.665	379.362	657.089	377.554	454.651	555.084	318.718	509.863	441.446	269.517	AT3G02760	F4IYF8	PF03129|PF13393	PTHR11476:SF7|PTHR11476
TRINITY_DN10199_c0_g1_i4	380.717	260.816	390.485	331.965	543.011	554.553	416.136	353.828	189.284	204.356	224.925	366.302	499.495	371.263	363.834	AT3G02760	F4IYF8	PF03129|PF13393	PTHR11476:SF7|PTHR11476
TRINITY_DN1019_c0_g1_i1	0	18.282	19.762	13.229	10.569	22.835	0	30.555	16.264	13.704	17.319	0	17.11	12.907	17.333	AT3G61415	Q8LF97	PF01466|PF03931	PTHR11165:SF116|PTHR11165
TRINITY_DN1019_c0_g1_i10	183.855	137.546	276.599	278.072	124.426	152.731	89.89	554.025	179.203	249.063	272.98	130.307	175.889	381.278	122.974	AT3G61415	Q8LF97	PF01466|PF03931	PTHR11165|PTHR11165:SF116
TRINITY_DN1019_c0_g1_i11	171.021	166.239	327.574	231.991	104.719	135.767	170.925	603.292	332.809	279.362	429.548	249.656	300.682	430.334	185.774	AT3G61415	Q8LF97		PTHR11165|PTHR11165:SF116
TRINITY_DN1019_c0_g1_i14	93.068	48.046	176.389	149.465	74.383	104.095	89.853	144.928	89.811	134.56	89.918	56.583	46.548	79.489	52.196	AT3G61415	Q8LF97	PF03931|PF01466	PTHR11165:SF116|PTHR11165
TRINITY_DN1019_c0_g1_i22	82.42	72.334	109.837	85.019	75.703	21.783	44.686	186.689	103.317	94.26	148.564	75.087	200.084	117.802	74.277	AT3G61415	Q8LF97	PF01466|PF03931	PTHR11165|PTHR11165:SF116
TRINITY_DN1019_c0_g1_i23	0	0	0	0	0	0	0	49.701	10.023	8.639	31.902	20.663	9.817	15.891	1.882	AT3G61415	Q8LF97	PF01466|PF03931	PTHR11165:SF116|PTHR11165
TRINITY_DN1019_c0_g1_i26	70.626	49.325	109.289	76.69	83.745	0	10.12	26.851	49.697	179.785	34.504	22.978	0	55.57	9.919	AT3G61415	Q8LF97	PF03931|PF01466	PTHR11165:SF116|PTHR11165
TRINITY_DN1019_c0_g1_i3	37.205	54.018	5.581	65.153	40.102	30.124	55.67	41.022	36.32	13.604	21.646	15.408	35.726	71.763	20.53	AT3G61415	Q8LF97		PTHR11165|PTHR11165:SF116
TRINITY_DN1019_c0_g1_i7	114.209	91.211	113.052	105.381	94.371	30.665	57.315	73.938	105.586	80.023	101.62	61.794	86.146	105.978	42.491	AT3G61415	Q8LF97	PF03931|PF01466	PTHR11165:SF116|PTHR11165
TRINITY_DN101_c0_g1_i11	0	0	0	0	0	0	1.703	0	0	0	0	0	0	0	0	AT5G46240	Q93Y37	PF01532	PTHR11742|PTHR11742:SF88
TRINITY_DN101_c0_g1_i12	7.782	0	4.422	2.974	13.906	0	0	16.211	4.053	15.435	0	30.288	43.2	21.868	7.54	AT5G46240	Q39128	PF00027|PF11834|PF00520|PF13857	PTHR45743:SF6|PTHR45743
TRINITY_DN101_c0_g1_i13	0	0	0	0	10.296	2.707	0	0	0	0	7.514	0	0	11.779	0	AT5G46240	Q39128	PF00520|PF00027	PTHR45743:SF6|PTHR45743
TRINITY_DN101_c0_g1_i15	0	0	0	0	0	0	0	0	0	0	0	0	0	0	0	AT4G18290	Q39128	PF13857|PF00027|PF11834|PF00520	PTHR45743:SF6|PTHR45743
TRINITY_DN101_c0_g1_i16	361.458	432.313	309.233	337.583	464.363	771.484	511.547	210.755	362.361	472.965	255.647	650.374	410.306	203.293	253.396	AT1G30000	Q39128	PF00520|PF12796|PF00027|PF11834	PTHR45743:SF6|PTHR45743
TRINITY_DN101_c0_g1_i19	184.096	263.434	125.142	152.746	92.884	74.661	210.771	469.365	232.482	291.237	395.774	0	232.546	353.619	129.315	AT1G30000	Q93Y37	PF01532	PTHR11742|PTHR11742:SF88
TRINITY_DN101_c0_g1_i3	0	0	0	0	0	0	4.979	0	0	0	0	0	0	0	2.999	AT5G46240	Q39128	PF00520	PTHR45743|PTHR45743:SF6
TRINITY_DN101_c0_g1_i7	35.061	20.658	50.141	27.589	24.701	163.127	0	25.526	16.784	27.975	69.934	7.302	58.581	31.05	0	AT1G30000	Q93Y37	PF01532	PTHR11742|PTHR11742:SF88
TRINITY_DN101_c0_g1_i8	0	1.051	5.063	1.108	0	0	0	12.719	3.321	4.535	1.13	2.088	2.368	2.391	1.085	AT5G46240	Q39128	PF00520	PTHR45743|PTHR45743:SF6
TRINITY_DN101_c0_g2_i1	0	0	2	0	8.998	2	4	1	5	0	5	11	7	11	6	AT1G30000	Q93Y37	PF01532	PTHR11742:SF88|PTHR11742
TRINITY_DN102002_c0_g2_i3	0	0	0	6.68	0	0	0	0	0	0	0	0	0	0	0	AT5G11170	A1DL85	PF00271|PF00270	PTHR47958|PTHR47958:SF15|PTHR47958:SF15|PTHR47958
TRINITY_DN102002_c0_g2_i5	0	2	13	30.32	0	0	2	3	0	2	5	0	0	0	0	AT5G11170	A1DL85	PF00271|PF00270	PTHR47958:SF15|PTHR47958
TRINITY_DN102007_c1_g1_i3	14	12	12	32	0	0	1	5	0	0	0	1	1	0	0	AT3G10300	P12815	PF13202|PF13833|PF13499	PTHR46212|PTHR46212:SF5
TRINITY_DN10201_c0_g1_i1	185.322	279.492	158.708	211.123	226.489	163.596	118.655	404.605	377.831	283.013	437.021	366.9	435.099	410.815	187.158	AT3G13990
TRINITY_DN10201_c0_g1_i2	109.692	446.126	194.272	208.299	228.987	340.491	157.435	167.481	360.634	166.395	192.977	299.654	319.037	322.141	383.963	AT3G13990	Q8VZS6	PF06972	PTHR47070|PTHR47070:SF2
TRINITY_DN10201_c0_g1_i3	616.47	24.364	422.056	525.4	612.712	472.899	577.029	731.64	260.559	454.588	439.003	280.447	652.871	1007.1	356.837	AT3G13990	Q8VZS6	PF06972	PTHR47070|PTHR47070:SF2
TRINITY_DN10201_c0_g1_i4	0	0	0	0	0	0	0	0	0	0	0	0	0	0	0	AT3G13990	Q8VZS6	PF06972	PTHR47070:SF2|PTHR47070
TRINITY_DN10201_c0_g1_i5	847.438	620.999	884.869	1064	1021.38	1038.44	809	1044.66	752.975	790	883.999	670	1017	967.992	696.562	AT3G13990	Q8VZS6	PF06972	PTHR47070:SF2|PTHR47070
TRINITY_DN10201_c0_g1_i6	0	0	0	149.183	0	0	0	0	0	0	0	0	0	0	0	AT3G13990	Q8VZS6	PF06972	PTHR47070:SF2|PTHR47070
TRINITY_DN102020_c0_g1_i1	0	0	7	0	0	0	0	10	0	1	0	0	0	0	0		P34121	PF00241	PTHR10829:SF49|PTHR10829
TRINITY_DN10202_c0_g1_i1	0	0	7.514	0	44.886	140.88	4.942	129.355	48.872	75.367	51.888	67.261	56.1	54.411	20.049	AT5G42270	O82150	PF17862|PF01434|PF00004	PTHR23076|PTHR23076:SF113
TRINITY_DN10202_c0_g1_i2	2.052	0	0	0	0	18.44	0	8.677	6.163	12.418	5.539	8.953	2.386	15.631	0	AT5G42270	O82150	PF00004	PTHR23076|PTHR23076:SF113
TRINITY_DN10202_c0_g1_i4	4758.7	3355.16	3506.58	4988.85	2943.8	2433.37	2315.56	6819.11	5514.28	4678.13	6624.83	5138.72	6518.17	3881.73	4999.28	AT1G50250	O82150	PF17862|PF01434|PF00004	PTHR23076:SF113|PTHR23076
TRINITY_DN10202_c0_g1_i5	0	35.956	15.846	17.053	13.048	38.825	25.586	9.945	5.083	9.443	3.497	19.94	7.926	3.208	4.978	AT5G42270	O82150	PF00004|PF17862	PTHR23076:SF113|PTHR23076
TRINITY_DN102041_c1_g1_i1	0	1	0	0	0	0	0	2	0	1	0	0	0	0	0	AT2G33040	Q6C338	PF00231	PTHR11693|PTHR11693:SF22
TRINITY_DN10204_c0_g1_i1	21.978	5.059	32.946	0	26.938	10.744	40.932	17.18	36.791	0	4.895	20.576	66.602	40.854	11.97	AT1G28110	Q93Y09	PF00450	PTHR11802:SF379|PTHR11802
TRINITY_DN10204_c0_g1_i8	22.022	39.941	54.054	67	112.98	70.229	18.068	98.82	56.209	49	50.105	87.424	151.398	111.146	38.029	AT1G28110	Q93Y09	PF00450	PTHR11802|PTHR11802:SF379
TRINITY_DN10204_c1_g1_i1	258.923	139.614	231.719	292.466	60.211	69.844	129.028	383.864	227.368	296.639	423.434	136.093	119.246	337.162	122.529
TRINITY_DN10204_c1_g1_i6	40.077	18.386	30.281	14.534	9.789	5.156	8.972	40.136	6.632	19.415	45.566	18.907	2.754	31.129	13.471
TRINITY_DN10205_c0_g1_i1	164.234	248.564	295.022	189.144	624.339	499.54	670.338	0	0	0	0	0	0	0	0	AT1G47840	Q6Q8A5	PF00349|PF03727	PTHR19443:SF63|PTHR19443
TRINITY_DN10205_c0_g1_i5	423.766	309.781	372.978	389.856	849.692	672.432	383.662	1440.01	1064.29	936.608	918	1240	2045.41	2343.92	1162.21	AT1G47840	Q6Q8A5	PF00349|PF03727	PTHR19443|PTHR19443:SF63
TRINITY_DN102077_c0_g1_i1	3	10	12	16	12	14	11	1	1	1	4.002	4	0	27	1			PF00705
TRINITY_DN102089_c0_g1_i1	0	0	0	0	0	0	0	0	0	2	0	0	0	0	0				PTHR42743:SF13|PTHR42743
TRINITY_DN102089_c0_g1_i2	0	0	1	0	0	0	0	0	0	2	0	0	0	0	0				PTHR42743:SF13|PTHR42743
TRINITY_DN102092_c0_g1_i1	1	0	0	7	0	0	1	0	3	5	0	3	3	0	6		Q55979
TRINITY_DN10209_c1_g1_i1	3861.51	1802.28	2714	4180.35	1039.73	693.999	1430	1849.84	1217.03	890	1544.67	1140.45	1419.03	317	1010.4	AT5G01410	Q39963	PF01680	PTHR31829|PTHR31829:SF6
TRINITY_DN10209_c1_g1_i2	0	0	0	0	0	0	0	0	0	0	0	0	0	0	0	AT5G01410	Q39963	PF01680	PTHR31829:SF6|PTHR31829
TRINITY_DN10209_c1_g1_i3	1271	882.282	1336	1472.64	2065.82	1684.07	2084.39	2893.34	1579.62	2323.64	2184.38	2083.07	1952.02	1816.14	1478.13	AT5G01410	Q39963	PF01680	PTHR31829|PTHR31829:SF6
TRINITY_DN10209_c1_g1_i7	0	10.864	0	0	0	0	0	17.516	6.351	0	10.281	34.663	17.882	0	12.913	AT5G01410	Q39963	PF01680	PTHR31829:SF6|PTHR31829
TRINITY_DN10211_c0_g1_i1	13.363	1.494	29.419	12.747	2.073	26.629	7.592	45.672	56.215	51.899	34.957	20.655	34.082	24.997	32.366	AT1G50820	Q9LNG5	PF10536	PTHR46033:SF6|PTHR46033
TRINITY_DN10211_c0_g1_i3	69.637	62.506	90.581	101.253	113.927	161.369	120.408	120.328	61.785	48.101	59.043	66.345	91.918	94.003	88.634	AT1G50820	Q9LNG5	PF10536	PTHR46033:SF6|PTHR46033
TRINITY_DN102125_c0_g1_i1	28	29	18	28	0	0	0	2	0	0	1	0	0	0	0	AT2G20580	Q7S8R8	PF17781|PF01851|PF01851|PF18051	PTHR10943|PTHR10943:SF1
TRINITY_DN10212_c0_g1_i10	0	21.763	6.177	40.947	57.354	50.293	34.557	324.281	183.69	235.939	279.753	220.457	223.676	308.904	122.409	AT2G44270	O64862	PF01171	PTHR11807:SF12|PTHR11807
TRINITY_DN10212_c0_g1_i13	456.36	319.463	578.393	452.449	382.664	284.755	350.404	166.501	92.971	139.05	174.368	107.461	82.301	197.976	109.734	AT2G44270	O64862	PF16503|PF01171	PTHR11807:SF12|PTHR11807
TRINITY_DN10212_c0_g1_i3	25.384	44.435	56.725	224.931	52.052	23.084	32.798	33.277	23.805	41.2	25.302	16.941	19.758	65.644	32.316	AT2G44270	O64862	PF01171	PTHR11807|PTHR11807:SF12
TRINITY_DN10212_c0_g1_i9	14.535	5.338	31.705	26.117	1.93	7.015	5.265	10.415	10.179	4.811	6.934	8.141	16.264	3.778	1.541	AT2G44270	O64862	PF01171	PTHR11807|PTHR11807:SF12
TRINITY_DN102137_c0_g1_i1	0	0	0	0	0	0	0	5	1	0	9	0	0	0	0	AT5G06580	Q12627	PF02913	PTHR11748|PTHR11748:SF116
TRINITY_DN10213_c0_g1_i1	0	0	0	0	0	0	2	1	0	0	2	54	15	22	88		P06600		PTHR34629:SF1|PTHR34629
TRINITY_DN10214_c0_g1_i1	1.631	0	0	8.339	0	13.053	0	15.192	3.879	4.04	4.189	8.045	4.33	16.68	0	AT4G03115	B0G143	PF00153	PTHR45618|PTHR45618:SF21
TRINITY_DN10214_c0_g1_i3	28.644	23.764	27.428	39.605	61.328	46.492	60.88	101.79	69.964	74.897	71.1	70.631	135.538	115.912	71.462	AT4G03115	B0G143	PF00153|PF00153	PTHR45618:SF21|PTHR45618
TRINITY_DN10214_c0_g1_i8	5.793	3.782	24.012	17.76	19.434	22.602	11.248	8.216	0	0	2.412	1.26	0	0	1.334	AT4G03115	B0G143	PF00153	PTHR45618|PTHR45618:SF21
TRINITY_DN10214_c0_g2_i14	27.933	11.533	21.56	21.296	76.238	22.852	19.872	64.802	12.158	22.063	31.299	17.064	55.132	68.408	19.203	AT4G03115	B0G143	PF00153|PF00153	PTHR45618|PTHR45618:SF21
TRINITY_DN10215_c0_g1_i3	327.015	243.533	216	297.318	172.443	164.452	231.696	353.396	350.693	276.936	265.894	209.421	179.548	328.9	145	AT1G60010		PF14009	PTHR33413:SF4|PTHR33413
TRINITY_DN10215_c0_g1_i4	13.245	1.508	0	9.682	1.557	3.549	3.304	1.604	15.307	5.064	17.106	3.579	0	6.141	0	AT1G60010		PF14009	PTHR33413:SF4|PTHR33413
TRINITY_DN10219_c0_g1_i12	93.369	89.82	88.574	103.937	103.212	78.613	61.611	71.457	50.093	60.251	42.021	57.899	89.809	60.665	47.382	AT1G69210			PTHR34544|PTHR34544:SF3
TRINITY_DN10219_c0_g1_i3	210.631	174.19	286.149	235.063	251.788	214.502	174.389	291.543	248.907	222.749	230.979	262.101	241.191	320.335	185.618	AT1G69210			PTHR34544|PTHR34544:SF3
TRINITY_DN1021_c0_g1_i11	21.984	5.283	20.284	21.606	23.725	47.932	25.209	0	0	0	1.211	0	0	0	0	AT4G25180	P05423	PF05132	PTHR13408|PTHR13408:SF6
TRINITY_DN1021_c0_g1_i12	222.512	279.399	316.645	240.878	351.59	172.537	427.838	694.824	595.203	464.036	538.134	396.267	599.573	804.458	640.555	AT5G09380	O74857	PF05132	PTHR13408:SF6|PTHR13408
TRINITY_DN1021_c0_g1_i13	192.667	158.061	423.033	332.454	186.968	184.781	224.557	585.346	300.273	297.538	340.314	276.911	222.543	400.628	258.83	AT4G25170	P05423	PF05132	PTHR13408:SF6|PTHR13408
TRINITY_DN1021_c0_g1_i14	234.876	140.3	229.345	241.991	86.566	73.701	64.662	170.247	104.299	121.901	145.841	66.857	74.913	107.708	50.298	AT4G25170			PTHR33625|PTHR33625:SF3
TRINITY_DN1021_c0_g1_i15	529.408	440.543	730.394	596.818	487.167	524.774	388.908	484.845	391.327	453.045	373.772	483.306	420.001	508.577	475.726	AT5G09380	O74857	PF05132	PTHR13408:SF6|PTHR13408
TRINITY_DN1021_c0_g1_i7	921.668	734.464	1184.3	1238.44	727.746	770.724	788.123	1415.91	911.898	1075.86	1088.43	836.744	937.663	1164.17	975.313	AT4G25170		PF05132	PTHR13408:SF6|PTHR13408
TRINITY_DN102206_c0_g1_i1	1	1	0	0	22	7	10	2	2	2	6	6	15	3	6				PTHR35708
TRINITY_DN102206_c0_g2_i3	30	17	50	52	62	17	69.679	95	82	74	64	27	92	58	52				PTHR35708:SF3|PTHR35708
TRINITY_DN10220_c0_g1_i1	603.007	679.129	786.571	847.513	783.257	697.965	827.3	926.906	664.277	819.208	761.677	789.529	830.049	779.272	742.739	AT1G28960	Q8GYB1	PF00293	PTHR12992|PTHR12992:SF27
TRINITY_DN10220_c0_g1_i2	7.012	18.087	0	22.237	15.046	82.91	9.371	7.877	12.621	2.495	0	0	29.987	5.509	0	AT1G28960	Q8GYB1	PF00293	PTHR12992|PTHR12992:SF27
TRINITY_DN10220_c0_g1_i3	3.815	10.753	0	8.672	8.401	50.876	7.625	5.071	0	14.138	0	3.672	16.088	8.932	9.049	AT1G28960	Q8GYB1		PTHR12992|PTHR12992:SF27
TRINITY_DN10220_c0_g1_i4	3.936	15.176	0	0	0	22.555	2.948	0	0	3.049	2.838	0	2.964	26.684	7.398	AT1G28960	Q8GYB1	PF00293	PTHR12992:SF27|PTHR12992
TRINITY_DN10220_c0_g1_i5	56.231	14.945	55.59	5.578	17.426	26.346	40.905	107.74	76.169	46.11	21.309	53.001	51.13	51.247	23.646	AT1G28960	Q8GYB1		PTHR12992:SF27|PTHR12992
TRINITY_DN10220_c0_g1_i6	0	0	0	0	8.674	11.348	4.85	0	3.902	0	14.177	3.797	1.785	6.315	0	AT1G28960	Q8GYB1		PTHR12992:SF27|PTHR12992
TRINITY_DN102240_c0_g1_i5	0	0	0	3	0	0	0	10	0	3	0	0	0	0	0		Q8BH82	PF13483	PTHR15032|PTHR15032:SF32
TRINITY_DN102242_c0_g1_i2	0	0	0	1	0	0	0	0	0	3	0	0	0	0	0		A0A2I6PIZ1	PF02515	PTHR48229
TRINITY_DN102242_c0_g1_i3	0	0	2	0	0	0	0	1	0	0	0	0	0	0	0		A0A2I6PIZ1	PF02515	PTHR48229
TRINITY_DN102255_c0_g2_i2	905	649	985	745	250	259	105	723	535	475	488	180	87	114	25	AT1G21270	Q9LMP1	PF12662	PTHR27005:SF379|PTHR27005
TRINITY_DN10227_c0_g1_i1	18	73	15	15	6200.94	5953.71	736.543	49	102	17	13	800	3526.99	1719.87	2310.11	AT4G11080	Q9T012	PF00505|PF00505|PF00505	PTHR46912:SF1|PTHR46912
TRINITY_DN10229_c0_g1_i1	709	566.417	755	927	377.059	376.998	493.967	997	659	851.002	877.001	661	542.662	749	480	AT4G04614	Q7SZP2		PTHR31833
TRINITY_DN10229_c1_g1_i1	14	5	49	66	45	7	26	106.099	32	36.11	28	39	46	20	96	AT4G27360	O02414	PF01221	PTHR11886|PTHR11886:SF70
TRINITY_DN10229_c2_g1_i1	110	16	180	330	37	29	6	167	166	133	247	31	64.001	10	11	AT4G27360	O02414	PF01221	PTHR11886|PTHR11886:SF70
TRINITY_DN1022_c0_g1_i1	534.322	610.516	703.876	619.178	733.453	710.2	756.052	681.331	582.658	672.802	598.993	854.268	721.536	864.007	520.96	AT5G44200	Q9XFD1	PF00076	PTHR18847:SF0|PTHR18847
TRINITY_DN1022_c0_g1_i7	72.678	45.894	72.078	148.822	111.11	120.6	88.353	208.669	125.342	138.198	86.33	104.732	170.464	146.993	63.556	AT5G44200	Q84L14	PF00076	PTHR18847|PTHR18847:SF0
TRINITY_DN10230_c0_g1_i4	79.628	54.788	104.133	60.296	202.516	36.047	193.425	0	0	7.724	0	7.985	35.068	35.836	89.063	AT2G47450	O22265	PF00385|PF13857	PTHR24128:SF43|PTHR24128
TRINITY_DN10230_c0_g1_i5	269.724	170.172	543.867	581.704	386.265	374.943	119.575	1042	612	478.276	384	354.015	656.981	310.968	506.937	AT2G47450	O22265	PF00385|PF13857	PTHR24128:SF43|PTHR24128
TRINITY_DN102331_c0_g2_i3	93	139	120	137	164	137	69	93	119	129	155	130	101	169	106	AT1G12680
TRINITY_DN102348_c0_g1_i2	70	10	35	19	0	1	0	4	0	1	2	0	0	0	0		Q7SB51	PF02537|PF02537	PTHR28259|PTHR28259:SF1
TRINITY_DN10234_c0_g1_i1	170	112.491	128.438	155	149	121	202.072	208	85	138	135.562	153	189.786	154	159	AT1G36310	Q94A09	PF08241	PTHR13069|PTHR13069|PTHR13069:SF33|PTHR13069:SF33
TRINITY_DN102358_c0_g2_i1	0	0	0	2	0	0	0	9	0	2	7	0	0	0	0		Q5MBR5	PF03055	PTHR10543|PTHR10543:SF89
TRINITY_DN102364_c0_g1_i2	10	7	12	11	5	0	0	1	0	2	0	0	0	0	0		Q07589	PF08546	PTHR21708|PTHR21708:SF26
[truncated: 63,534 more rows]

## Sheet: S8
Table S8. Top 30 contributing unigenes for Principal Component 1.The list shows 15 unigenes with the highest positive loadings (blue) and 15 unigenes with the highest negative loadings (orange). NA indicates no annotations are available.
[truncated: 31 more rows]

[truncated: 5 more sheets: S9, S10, S11, S12, S13]
