# Supplementary material for: An ecological transcriptome approach to capture the molecular and physiological mechanisms of mass flowering in Shorea curtisii
Source: PeerJ. 2023 Nov 29;11:e16368. doi: 10.7717/peerj.16368 (PMC10693236; doi:10.7717/peerj.16368)
Supplement: Supplemental Information 11 [file peerj-11-16368-s011.xlsx]

## Sheet: S14
Table S14. Enrichment test for A. thaliana gene set and leaf DEU in S. curtisii
Gene Sets	X1	X2	X3	X4			DEU	Non-DEU
Fisher_leaf_preliminary_set1	396	10156	1334	52346			X1 (from 1B)	X2 (from 1A - X1)	Unigene in gene set X
Fisher_leaf_preliminary_set2	373	10540	1357	51962			X3 (Total DEU - X1)	X4 (Total gene - X1 - X2 - X3)	Unigene not in gene set X
Fisher_leaf_preliminary_set3	47	719	1683	61783
Fisher_leaf_preliminary_set4	94	867	1636	61635			Total DEU in leaf	1730
Fisher_leaf_preliminary_set5	76	411	1654	62091			Total unigene	64232
Fisher_leaf_preliminary_set6	97	1483	1633	61019
Fisher_leaf_preliminary_set7	140	1429	1590	61073
Fisher_leaf_preliminary_set8	38	1451	1692	61051
Fisher_leaf_preliminary_set9	72	1462	1658	61040
Fisher_leaf_preliminary_set10	218	3584	1512	58918
Fisher_leaf_preliminary_set11	123	3770	1607	58732
Fisher_leaf_preliminary_set12	49	473	1681	62029
Fisher_leaf_preliminary_set13	40	1045	1690	61457
Fisher_leaf_preliminary_set14	13	702	1717	61800
Fisher_leaf_preliminary_set15	32	291	1698	62211
Fisher_leaf_preliminary_set16	16	288	1714	62214
Fisher_leaf_preliminary_set17	58	956	1672	61546
Fisher_leaf_preliminary_set18	79	746	1651	61756
Fisher_leaf_preliminary_set19	26	648	1704	61854
Fisher_leaf_preliminary_set20	128	1746	1602	60756
Fisher_leaf_preliminary_set21	100	1523	1630	60979
Fisher_leaf_preliminary_set22	115	1297	1615	61205
Fisher_leaf_preliminary_set23	63	768	1667	61734
Fisher_leaf_preliminary_set24	124	1818	1606	60684
Fisher_leaf_preliminary_set25	148	1892	1582	60610
Fisher_leaf_preliminary_set26	268	5720	1462	56782
Fisher_leaf_preliminary_set27	211	4530	1519	57972
Fisher_leaf_preliminary_set28	87	935	1643	61567
Fisher_leaf_preliminary_set29	9	362	1721	62140
Fisher_leaf_preliminary_set30	49	619	1681	61883
Fisher_leaf_preliminary_set31	2	83	1728	62419
Fisher_leaf_preliminary_set32	26	157	1704	62345
Fisher_leaf_preliminary_set33	1	7	1729	62495
Fisher_leaf_preliminary_set34	63	861	1667	61641
Fisher_leaf_preliminary_set35	32	578	1698	61924

## Sheet: S15
Table S15. Enrichment test for A. thaliana gene set and bud DEU in S. curtisii
Gene Sets	X1	X2	X3	X4			DEU	Non-DEU
Fisher_bud_preliminary_set1	657	9895	2902	50778			X1 (from 1B)	X2 (from 1A - X1)	Unigene in gene set X
Fisher_bud_preliminary_set2	878	10035	2681	50638			X3 (Total DEU - X1)	X4 (Total gene - X1 - X2 - X3)	Unigene not in gene set X
Fisher_bud_preliminary_set3	105	661	3454	60012
Fisher_bud_preliminary_set4	170	791	3389	59882			Total DEU in bud	3559
Fisher_bud_preliminary_set5	96	391	3463	60282			Total unigene	64232
Fisher_bud_preliminary_set6	140	1440	3419	59233
Fisher_bud_preliminary_set7	224	1345	3335	59328
Fisher_bud_preliminary_set8	70	1419	3489	59254
Fisher_bud_preliminary_set9	121	1413	3438	59260
Fisher_bud_preliminary_set10	366	3436	3193	57237
Fisher_bud_preliminary_set11	281	3612	3278	57061
Fisher_bud_preliminary_set12	94	428	3465	60245
Fisher_bud_preliminary_set13	66	1019	3493	59654
Fisher_bud_preliminary_set14	59	656	3500	60017
Fisher_bud_preliminary_set15	45	278	3514	60395
Fisher_bud_preliminary_set16	41	263	3518	60410
Fisher_bud_preliminary_set17	124	890	3435	59783
Fisher_bud_preliminary_set18	122	703	3437	59970
Fisher_bud_preliminary_set19	71	603	3488	60070
Fisher_bud_preliminary_set20	230	1644	3329	59029
Fisher_bud_preliminary_set21	202	1421	3357	59252
Fisher_bud_preliminary_set22	195	1217	3364	59456
Fisher_bud_preliminary_set23	138	693	3421	59980
Fisher_bud_preliminary_set24	177	1765	3382	58908
Fisher_bud_preliminary_set25	297	1743	3262	58930
Fisher_bud_preliminary_set26	531	5457	3028	55216
Fisher_bud_preliminary_set27	315	4426	3244	56247
Fisher_bud_preliminary_set28	128	894	3431	59779
Fisher_bud_preliminary_set29	26	345	3533	60328
Fisher_bud_preliminary_set30	64	604	3495	60069
Fisher_bud_preliminary_set31	6	79	3553	60594
Fisher_bud_preliminary_set32	19	164	3540	60509
Fisher_bud_preliminary_set33	1	7	3558	60666
Fisher_bud_preliminary_set34	99	825	3460	59848
Fisher_bud_preliminary_set35	73	537	3486	60136

## Sheet: S16
Table S16. Enrichment test for A. thaliana gene set and leaf DEU cluster 1
Gene Sets	Y1	Y2	Y3	Y4			DEU in Cluster 1	DEU NOT in Cluster 1
Fisher_leaf_clr_cluster1_set1	63	333	187	1147			Y1 (from 4B)	Y2 (from 1B - X1)	DEU in gene set X
Fisher_leaf_clr_cluster1_set2	30	343	220	1137			Y3 (Total DEU in cluster - X1)	Y4 (Total DEU - X1 -X2 -X3)	DEU NOT in gene set X
Fisher_leaf_clr_cluster1_set3	14	33	236	1447
Fisher_leaf_clr_cluster1_set4	4	90	246	1390			Total DEU in Cluster	250
Fisher_leaf_clr_cluster1_set5	10	66	240	1414			Total DEU Leaf	1730
Fisher_leaf_clr_cluster1_set6	24	73	226	1407
Fisher_leaf_clr_cluster1_set7	21	119	229	1361
Fisher_leaf_clr_cluster1_set8	2	36	248	1444
Fisher_leaf_clr_cluster1_set9	10	62	240	1418
Fisher_leaf_clr_cluster1_set10	36	182	214	1298
Fisher_leaf_clr_cluster1_set11	18	105	232	1375
Fisher_leaf_clr_cluster1_set12	1	48	249	1432
Fisher_leaf_clr_cluster1_set13	7	33	243	1447
Fisher_leaf_clr_cluster1_set14	0	13	250	1467
Fisher_leaf_clr_cluster1_set15	5	27	245	1453
Fisher_leaf_clr_cluster1_set16	7	9	243	1471
Fisher_leaf_clr_cluster1_set17	6	52	244	1428
Fisher_leaf_clr_cluster1_set18	14	65	236	1415
Fisher_leaf_clr_cluster1_set19	4	22	246	1458
Fisher_leaf_clr_cluster1_set20	22	106	228	1374
Fisher_leaf_clr_cluster1_set21	7	93	243	1387
Fisher_leaf_clr_cluster1_set22	15	100	235	1380
Fisher_leaf_clr_cluster1_set23	20	43	230	1437
Fisher_leaf_clr_cluster1_set24	19	105	231	1375
Fisher_leaf_clr_cluster1_set25	15	133	235	1347
Fisher_leaf_clr_cluster1_set26	38	230	212	1250
Fisher_leaf_clr_cluster1_set27	32	179	218	1301
Fisher_leaf_clr_cluster1_set28	25	62	225	1418
Fisher_leaf_clr_cluster1_set29	1	8	249	1472
Fisher_leaf_clr_cluster1_set30	19	30	231	1450
Fisher_leaf_clr_cluster1_set31	1	1	249	1479
Fisher_leaf_clr_cluster1_set32	6	20	244	1460
Fisher_leaf_clr_cluster1_set33	0	1	250	1479
Fisher_leaf_clr_cluster1_set34	11	52	239	1428
Fisher_leaf_clr_cluster1_set35	3	29	247	1451

## Sheet: S17
Table S17. Enrichment test for A. thaliana gene set and leaf DEU cluster 2
Gene Sets	Y1	Y2	Y3	Y4			DEU in Cluster 2	DEU NOT in Cluster 2
Fisher_leaf_clr_cluster2_set1	28	368	98	1236			Y1 (from 4B)	Y2 (from 1B - X1)	DEU in gene set X
Fisher_leaf_clr_cluster2_set2	26	347	100	1257			Y3 (Total DEU in cluster - X1)	Y4 (Total DEU - X1 -X2 -X3)	DEU NOT in gene set X
Fisher_leaf_clr_cluster2_set3	6	41	120	1563
Fisher_leaf_clr_cluster2_set4	7	87	119	1517			Total DEU in Cluster	126
Fisher_leaf_clr_cluster2_set5	1	75	125	1529			Total DEU Leaf	1730
Fisher_leaf_clr_cluster2_set6	3	94	123	1510
Fisher_leaf_clr_cluster2_set7	13	127	113	1477
Fisher_leaf_clr_cluster2_set8	10	28	116	1576
Fisher_leaf_clr_cluster2_set9	3	69	123	1535
Fisher_leaf_clr_cluster2_set10	14	204	112	1400
Fisher_leaf_clr_cluster2_set11	5	118	121	1486
Fisher_leaf_clr_cluster2_set12	1	48	125	1556
Fisher_leaf_clr_cluster2_set13	3	37	123	1567
Fisher_leaf_clr_cluster2_set14	1	12	125	1592
Fisher_leaf_clr_cluster2_set15	3	29	123	1575
Fisher_leaf_clr_cluster2_set16	0	16	126	1588
Fisher_leaf_clr_cluster2_set17	8	50	118	1554
Fisher_leaf_clr_cluster2_set18	4	75	122	1529
Fisher_leaf_clr_cluster2_set19	4	22	122	1582
Fisher_leaf_clr_cluster2_set20	12	116	114	1488
Fisher_leaf_clr_cluster2_set21	5	95	121	1509
Fisher_leaf_clr_cluster2_set22	11	104	115	1500
Fisher_leaf_clr_cluster2_set23	7	56	119	1548
Fisher_leaf_clr_cluster2_set24	3	121	123	1483
Fisher_leaf_clr_cluster2_set25	7	141	119	1463
Fisher_leaf_clr_cluster2_set26	13	255	113	1349
Fisher_leaf_clr_cluster2_set27	9	202	117	1402
Fisher_leaf_clr_cluster2_set28	10	77	116	1527
Fisher_leaf_clr_cluster2_set29	0	9	126	1595
Fisher_leaf_clr_cluster2_set30	1	48	125	1556
Fisher_leaf_clr_cluster2_set31	0	2	126	1602
Fisher_leaf_clr_cluster2_set32	1	25	125	1579
Fisher_leaf_clr_cluster2_set33	0	1	126	1603
Fisher_leaf_clr_cluster2_set34	13	50	113	1554
Fisher_leaf_clr_cluster2_set35	3	29	123	1575

## Sheet: S18
Table S18. Enrichment test for A. thaliana gene set and leaf DEU cluster 3
Gene Sets	Y1	Y2	Y3	Y4			DEU in Cluster 3	DEU NOT in Cluster 3
Fisher_leaf_clr_cluster3_set1	114	282	197	1137			Y1 (from 4B)	Y2 (from 1B - X1)	DEU in gene set X
Fisher_leaf_clr_cluster3_set2	32	341	279	1078			Y3 (Total DEU in cluster - X1)	Y4 (Total DEU - X1 -X2 -X3)	DEU NOT in gene set X
Fisher_leaf_clr_cluster3_set3	8	39	303	1380
Fisher_leaf_clr_cluster3_set4	46	48	265	1371			Total DEU in Cluster	311
Fisher_leaf_clr_cluster3_set5	59	17	252	1402			Total DEU Leaf	1730
Fisher_leaf_clr_cluster3_set6	6	91	305	1328
Fisher_leaf_clr_cluster3_set7	34	106	277	1313
Fisher_leaf_clr_cluster3_set8	2	36	309	1383
Fisher_leaf_clr_cluster3_set9	10	62	301	1357
Fisher_leaf_clr_cluster3_set10	70	148	241	1271
Fisher_leaf_clr_cluster3_set11	15	108	296	1311
Fisher_leaf_clr_cluster3_set12	18	31	293	1388
Fisher_leaf_clr_cluster3_set13	4	36	307	1383
Fisher_leaf_clr_cluster3_set14	5	8	306	1411
Fisher_leaf_clr_cluster3_set15	8	24	303	1395
Fisher_leaf_clr_cluster3_set16	4	12	307	1407
Fisher_leaf_clr_cluster3_set17	4	54	307	1365
Fisher_leaf_clr_cluster3_set18	38	41	273	1378
Fisher_leaf_clr_cluster3_set19	2	24	309	1395
Fisher_leaf_clr_cluster3_set20	51	77	260	1342
Fisher_leaf_clr_cluster3_set21	18	82	293	1337
Fisher_leaf_clr_cluster3_set22	9	106	302	1313
Fisher_leaf_clr_cluster3_set23	15	48	296	1371
Fisher_leaf_clr_cluster3_set24	23	101	288	1318
Fisher_leaf_clr_cluster3_set25	18	130	293	1289
Fisher_leaf_clr_cluster3_set26	62	206	249	1213
Fisher_leaf_clr_cluster3_set27	26	185	285	1234
Fisher_leaf_clr_cluster3_set28	17	70	294	1349
Fisher_leaf_clr_cluster3_set29	0	9	311	1410
Fisher_leaf_clr_cluster3_set30	6	43	305	1376
Fisher_leaf_clr_cluster3_set31	0	2	311	1417
Fisher_leaf_clr_cluster3_set32	12	14	299	1405
Fisher_leaf_clr_cluster3_set33	0	1	311	1418
Fisher_leaf_clr_cluster3_set34	14	49	297	1370
Fisher_leaf_clr_cluster3_set35	0	32	311	1387

## Sheet: S19
Table S19. Enrichment test for A. thaliana gene set and leaf DEU cluster 4
Gene Sets	Y1	Y2	Y3	Y4			DEU in Cluster 4	DEU NOT in Cluster 4
Fisher_leaf_clr_cluster4_set1	51	345	214	1120			Y1 (from 4B)	Y2 (from 1B - X1)	DEU in gene set X
Fisher_leaf_clr_cluster4_set2	49	324	216	1141			Y3 (Total DEU in cluster - X1)	Y4 (Total DEU - X1 -X2 -X3)	DEU NOT in gene set X
Fisher_leaf_clr_cluster4_set3	5	42	260	1423
Fisher_leaf_clr_cluster4_set4	4	90	261	1375			Total DEU in Cluster	265
Fisher_leaf_clr_cluster4_set5	1	75	264	1390			Total DEU Leaf	1730
Fisher_leaf_clr_cluster4_set6	19	78	246	1387
Fisher_leaf_clr_cluster4_set7	37	103	228	1362
Fisher_leaf_clr_cluster4_set8	11	27	254	1438
Fisher_leaf_clr_cluster4_set9	8	64	257	1401
Fisher_leaf_clr_cluster4_set10	27	191	238	1274
Fisher_leaf_clr_cluster4_set11	16	107	249	1358
Fisher_leaf_clr_cluster4_set12	2	47	263	1418
Fisher_leaf_clr_cluster4_set13	6	34	259	1431
Fisher_leaf_clr_cluster4_set14	1	12	264	1453
Fisher_leaf_clr_cluster4_set15	5	27	260	1438
Fisher_leaf_clr_cluster4_set16	1	15	264	1450
Fisher_leaf_clr_cluster4_set17	6	52	259	1413
Fisher_leaf_clr_cluster4_set18	0	79	265	1386
Fisher_leaf_clr_cluster4_set19	2	24	263	1441
Fisher_leaf_clr_cluster4_set20	6	122	259	1343
Fisher_leaf_clr_cluster4_set21	11	89	254	1376
Fisher_leaf_clr_cluster4_set22	9	106	256	1359
Fisher_leaf_clr_cluster4_set23	3	60	262	1405
Fisher_leaf_clr_cluster4_set24	52	72	213	1393
Fisher_leaf_clr_cluster4_set25	9	139	256	1326
Fisher_leaf_clr_cluster4_set26	27	241	238	1224
Fisher_leaf_clr_cluster4_set27	75	136	190	1329
Fisher_leaf_clr_cluster4_set28	17	70	248	1395
Fisher_leaf_clr_cluster4_set29	2	7	263	1458
Fisher_leaf_clr_cluster4_set30	11	38	254	1427
Fisher_leaf_clr_cluster4_set31	0	2	265	1463
Fisher_leaf_clr_cluster4_set32	4	22	261	1443
Fisher_leaf_clr_cluster4_set33	0	1	265	1464
Fisher_leaf_clr_cluster4_set34	4	59	261	1406
Fisher_leaf_clr_cluster4_set35	2	30	263	1435

## Sheet: S20
Table S20. Enrichment test for A. thaliana gene set and leaf DEU cluster 5
Gene Sets	Y1	Y2	Y3	Y4			DEU in Cluster 5	DEU NOT in Cluster 5
Fisher_leaf_clr_cluster5_set1	47	349	131	1203			Y1 (from 4B)	Y2 (from 1B - X1)	DEU in gene set X
Fisher_leaf_clr_cluster5_set2	29	344	149	1208			Y3 (Total DEU in cluster - X1)	Y4 (Total DEU - X1 -X2 -X3)	DEU NOT in gene set X
Fisher_leaf_clr_cluster5_set3	2	45	176	1507
Fisher_leaf_clr_cluster5_set4	10	84	168	1468			Total DEU in Cluster	178
Fisher_leaf_clr_cluster5_set5	4	72	174	1480			Total DEU Leaf	1730
Fisher_leaf_clr_cluster5_set6	7	90	171	1462
Fisher_leaf_clr_cluster5_set7	10	130	168	1422
Fisher_leaf_clr_cluster5_set8	4	34	174	1518
Fisher_leaf_clr_cluster5_set9	7	65	171	1487
Fisher_leaf_clr_cluster5_set10	18	200	160	1352
Fisher_leaf_clr_cluster5_set11	14	109	164	1443
Fisher_leaf_clr_cluster5_set12	10	39	168	1513
Fisher_leaf_clr_cluster5_set13	5	35	173	1517
Fisher_leaf_clr_cluster5_set14	1	12	177	1540
Fisher_leaf_clr_cluster5_set15	6	26	172	1526
Fisher_leaf_clr_cluster5_set16	2	14	176	1538
Fisher_leaf_clr_cluster5_set17	5	53	173	1499
Fisher_leaf_clr_cluster5_set18	10	69	168	1483
Fisher_leaf_clr_cluster5_set19	1	25	177	1527
Fisher_leaf_clr_cluster5_set20	13	115	165	1437
Fisher_leaf_clr_cluster5_set21	8	92	170	1460
Fisher_leaf_clr_cluster5_set22	3	112	175	1440
Fisher_leaf_clr_cluster5_set23	2	61	176	1491
Fisher_leaf_clr_cluster5_set24	13	111	165	1441
Fisher_leaf_clr_cluster5_set25	13	135	165	1417
Fisher_leaf_clr_cluster5_set26	39	229	139	1323
Fisher_leaf_clr_cluster5_set27	24	187	154	1365
Fisher_leaf_clr_cluster5_set28	7	80	171	1472
Fisher_leaf_clr_cluster5_set29	2	7	176	1545
Fisher_leaf_clr_cluster5_set30	1	48	177	1504
Fisher_leaf_clr_cluster5_set31	0	2	178	1550
Fisher_leaf_clr_cluster5_set32	2	24	176	1528
Fisher_leaf_clr_cluster5_set33	0	1	178	1551
Fisher_leaf_clr_cluster5_set34	3	60	175	1492
Fisher_leaf_clr_cluster5_set35	5	27	173	1525

## Sheet: S21
Table S21. Enrichment test for A. thaliana gene set and leaf DEU cluster 6
Gene Sets	Y1	Y2	Y3	Y4			DEU in Cluster 6	DEU NOT in Cluster 6
Fisher_leaf_clr_cluster6_set1	93	303	507	827			Y1 (from 4B)	Y2 (from 1B - X1)	DEU in gene set X
Fisher_leaf_clr_cluster6_set2	207	166	393	964			Y3 (Total DEU in cluster - X1)	Y4 (Total DEU - X1 -X2 -X3)	DEU NOT in gene set X
Fisher_leaf_clr_cluster6_set3	12	35	588	1095
Fisher_leaf_clr_cluster6_set4	23	71	577	1059			Total DEU in Cluster	600
Fisher_leaf_clr_cluster6_set5	1	75	599	1055			Total DEU Leaf	1730
Fisher_leaf_clr_cluster6_set6	38	59	562	1071
Fisher_leaf_clr_cluster6_set7	25	115	575	1015
Fisher_leaf_clr_cluster6_set8	9	29	591	1101
Fisher_leaf_clr_cluster6_set9	34	38	566	1092
Fisher_leaf_clr_cluster6_set10	53	165	547	965
Fisher_leaf_clr_cluster6_set11	55	68	545	1062
Fisher_leaf_clr_cluster6_set12	17	32	583	1098
Fisher_leaf_clr_cluster6_set13	15	25	585	1105
Fisher_leaf_clr_cluster6_set14	5	8	595	1122
Fisher_leaf_clr_cluster6_set15	5	27	595	1103
Fisher_leaf_clr_cluster6_set16	2	14	598	1116
Fisher_leaf_clr_cluster6_set17	29	29	571	1101
Fisher_leaf_clr_cluster6_set18	13	66	587	1064
Fisher_leaf_clr_cluster6_set19	13	13	587	1117
Fisher_leaf_clr_cluster6_set20	24	104	576	1026
Fisher_leaf_clr_cluster6_set21	51	49	549	1081
Fisher_leaf_clr_cluster6_set22	68	47	532	1083
Fisher_leaf_clr_cluster6_set23	16	47	584	1083
Fisher_leaf_clr_cluster6_set24	14	110	586	1020
Fisher_leaf_clr_cluster6_set25	86	62	514	1068
Fisher_leaf_clr_cluster6_set26	89	179	511	951
Fisher_leaf_clr_cluster6_set27	45	166	555	964
Fisher_leaf_clr_cluster6_set28	11	76	589	1054
Fisher_leaf_clr_cluster6_set29	4	5	596	1125
Fisher_leaf_clr_cluster6_set30	11	38	589	1092
Fisher_leaf_clr_cluster6_set31	1	1	599	1129
Fisher_leaf_clr_cluster6_set32	1	25	599	1105
Fisher_leaf_clr_cluster6_set33	1	0	599	1130
Fisher_leaf_clr_cluster6_set34	18	45	582	1085
Fisher_leaf_clr_cluster6_set35	19	13	581	1117

## Sheet: S22
Table S22. Results for enrichment analysis between DEU clusters in leaf and A. thaliana gene sets
Bonferroni = P-value after Bonferroni's correction
Geneset_cluster	P_value	Bonferroni
Fisher_leaf_clr_cluster1_set1	0.1945	1.167
Fisher_leaf_clr_cluster1_set2	1	6
Fisher_leaf_clr_cluster1_set3	0.004722	0.028332
Fisher_leaf_clr_cluster1_set4	0.9997	5.9982
Fisher_leaf_clr_cluster1_set5	0.6795	4.077
Fisher_leaf_clr_cluster1_set6	0.003985	0.02391
Fisher_leaf_clr_cluster1_set7	0.4632	2.7792
Fisher_leaf_clr_cluster1_set9	0.6083	3.6498
Fisher_leaf_clr_cluster1_set10	0.2034	1.2204
Fisher_leaf_clr_cluster1_set12	0.9996	5.9976
Fisher_leaf_clr_cluster1_set15	0.5013	3.0078
Fisher_leaf_clr_cluster1_set17	0.8659	5.1954
Fisher_leaf_clr_cluster1_set18	0.2415	1.449
Fisher_leaf_clr_cluster1_set20	0.2134	1.2804
Fisher_leaf_clr_cluster1_set21	0.9941	5.9646
Fisher_leaf_clr_cluster1_set22	0.713	4.278
Fisher_leaf_clr_cluster1_set23	0.0002942	0.0017652
Fisher_leaf_clr_cluster1_set24	0.4285	2.571
Fisher_leaf_clr_cluster1_set25	0.9588	5.7528
Fisher_leaf_clr_cluster1_set26	0.586	3.516
Fisher_leaf_clr_cluster1_set27	0.4096	2.4576
Fisher_leaf_clr_cluster1_set28	0.0003031	0.0018186
Fisher_leaf_clr_cluster1_set30	1.819e-05	0.00010914
Fisher_leaf_clr_cluster1_set32	0.1617	0.9702
Fisher_leaf_clr_cluster1_set34	0.295	1.77
Fisher_leaf_clr_cluster2_set1	0.6101	3.6606
Fisher_leaf_clr_cluster2_set2	0.6401	3.8406
Fisher_leaf_clr_cluster2_set3	0.1217	0.7302
Fisher_leaf_clr_cluster2_set4	0.5354	3.2124
Fisher_leaf_clr_cluster2_set5	0.9972	5.9832
Fisher_leaf_clr_cluster2_set6	0.9784	5.8704
Fisher_leaf_clr_cluster2_set7	0.2125	1.275
Fisher_leaf_clr_cluster2_set9	0.9079	5.4474
Fisher_leaf_clr_cluster2_set10	0.7407	4.4442
Fisher_leaf_clr_cluster2_set12	0.9767	5.8602
Fisher_leaf_clr_cluster2_set15	0.416	2.496
Fisher_leaf_clr_cluster2_set17	0.05518	0.33108
Fisher_leaf_clr_cluster2_set18	0.8421	5.0526
Fisher_leaf_clr_cluster2_set20	0.2154	1.2924
Fisher_leaf_clr_cluster2_set21	0.8688	5.2128
Fisher_leaf_clr_cluster2_set22	0.2098	1.2588
Fisher_leaf_clr_cluster2_set23	0.1695	1.017
Fisher_leaf_clr_cluster2_set24	0.9961	5.9766
Fisher_leaf_clr_cluster2_set25	0.9288	5.5728
Fisher_leaf_clr_cluster2_set26	0.9689	5.8134
Fisher_leaf_clr_cluster2_set27	0.9799	5.8794
Fisher_leaf_clr_cluster2_set28	0.09533	0.57198
Fisher_leaf_clr_cluster2_set30	0.9767	5.8602
Fisher_leaf_clr_cluster2_set32	0.8621	5.1726
Fisher_leaf_clr_cluster2_set34	0.0003954	0.0023724
Fisher_leaf_clr_cluster3_set1	6.959e-10	4.1754e-09
Fisher_leaf_clr_cluster3_set2	1	6
Fisher_leaf_clr_cluster3_set3	0.6293	3.7758
Fisher_leaf_clr_cluster3_set4	1.346e-12	8.076e-12
Fisher_leaf_clr_cluster3_set5	2.2e-16	1.32e-15
Fisher_leaf_clr_cluster3_set6	0.9999	5.9994
Fisher_leaf_clr_cluster3_set7	0.03097	0.18582
Fisher_leaf_clr_cluster3_set9	0.8614	5.1684
Fisher_leaf_clr_cluster3_set10	3.914e-08	2.3484e-07
Fisher_leaf_clr_cluster3_set12	0.001233	0.007398
Fisher_leaf_clr_cluster3_set15	0.2035	1.221
Fisher_leaf_clr_cluster3_set17	0.9962	5.9772
Fisher_leaf_clr_cluster3_set18	2.933e-10	1.7598e-09
Fisher_leaf_clr_cluster3_set20	1.087e-09	6.522e-09
Fisher_leaf_clr_cluster3_set21	0.5409	3.2454
Fisher_leaf_clr_cluster3_set22	0.9996	5.9976
Fisher_leaf_clr_cluster3_set23	0.1448	0.8688
Fisher_leaf_clr_cluster3_set24	0.471	2.826
Fisher_leaf_clr_cluster3_set25	0.9828	5.8968
Fisher_leaf_clr_cluster3_set26	0.01199	0.07194
Fisher_leaf_clr_cluster3_set27	0.9932	5.9592
Fisher_leaf_clr_cluster3_set28	0.3928	2.3568
Fisher_leaf_clr_cluster3_set30	0.8993	5.3958
Fisher_leaf_clr_cluster3_set32	0.0008044	0.0048264
Fisher_leaf_clr_cluster3_set34	0.2289	1.3734
Fisher_leaf_clr_cluster4_set1	0.9487	5.6922
Fisher_leaf_clr_cluster4_set2	0.9212	5.5272
Fisher_leaf_clr_cluster4_set3	0.8695	5.217
Fisher_leaf_clr_cluster4_set4	0.9999	5.9994
Fisher_leaf_clr_cluster4_set5	1	6
Fisher_leaf_clr_cluster4_set6	0.1457	0.8742
Fisher_leaf_clr_cluster4_set7	0.0002706	0.0016236
Fisher_leaf_clr_cluster4_set9	0.8845	5.307
Fisher_leaf_clr_cluster4_set10	0.92	5.52
Fisher_leaf_clr_cluster4_set12	0.9974	5.9844
Fisher_leaf_clr_cluster4_set15	0.557	3.342
Fisher_leaf_clr_cluster4_set17	0.9008	5.4048
Fisher_leaf_clr_cluster4_set18	1	6
Fisher_leaf_clr_cluster4_set20	1	6
Fisher_leaf_clr_cluster4_set21	0.9209	5.5254
Fisher_leaf_clr_cluster4_set22	0.9957	5.9742
Fisher_leaf_clr_cluster4_set23	0.9981	5.9886
Fisher_leaf_clr_cluster4_set24	7.542e-14	4.5252e-13
Fisher_leaf_clr_cluster4_set25	0.9999	5.9994
Fisher_leaf_clr_cluster4_set26	0.9974	5.9844
Fisher_leaf_clr_cluster4_set27	3.418e-15	2.0508e-14
Fisher_leaf_clr_cluster4_set28	0.1654	0.9924
Fisher_leaf_clr_cluster4_set30	0.1168	0.7008
Fisher_leaf_clr_cluster4_set32	0.5806	3.4836
Fisher_leaf_clr_cluster4_set34	0.9921	5.9526
Fisher_leaf_clr_cluster5_set1	0.1396	0.8376
Fisher_leaf_clr_cluster5_set2	0.9741	5.8446
Fisher_leaf_clr_cluster5_set3	0.963	5.778
Fisher_leaf_clr_cluster5_set4	0.5072	3.0432
Fisher_leaf_clr_cluster5_set5	0.9631	5.7786
Fisher_leaf_clr_cluster5_set6	0.889	5.334
Fisher_leaf_clr_cluster5_set7	0.9285	5.571
Fisher_leaf_clr_cluster5_set9	0.624	3.744
Fisher_leaf_clr_cluster5_set10	0.8823	5.2938
Fisher_leaf_clr_cluster5_set12	0.02387	0.14322
Fisher_leaf_clr_cluster5_set15	0.1029	0.6174
Fisher_leaf_clr_cluster5_set17	0.7295	4.377
Fisher_leaf_clr_cluster5_set18	0.2901	1.7406
Fisher_leaf_clr_cluster5_set20	0.5671	3.4026
Fisher_leaf_clr_cluster5_set21	0.8271	4.9626
Fisher_leaf_clr_cluster5_set22	0.9997	5.9982
Fisher_leaf_clr_cluster5_set23	0.992	5.952
Fisher_leaf_clr_cluster5_set24	0.5176	3.1056
Fisher_leaf_clr_cluster5_set25	0.7761	4.6566
Fisher_leaf_clr_cluster5_set26	0.01042	0.06252
Fisher_leaf_clr_cluster5_set27	0.3255	1.953
Fisher_leaf_clr_cluster5_set28	0.8104	4.8624
Fisher_leaf_clr_cluster5_set30	0.9955	5.973
Fisher_leaf_clr_cluster5_set32	0.7656	4.5936
Fisher_leaf_clr_cluster5_set34	0.9661	5.7966
Fisher_leaf_clr_cluster6_set1	1	6
Fisher_leaf_clr_cluster6_set2	2.2e-16	1.32e-15
Fisher_leaf_clr_cluster6_set3	0.9351	5.6106
Fisher_leaf_clr_cluster6_set4	0.9894	5.9364
Fisher_leaf_clr_cluster6_set5	1	6
Fisher_leaf_clr_cluster6_set6	0.1977	1.1862
Fisher_leaf_clr_cluster6_set7	1	6
Fisher_leaf_clr_cluster6_set9	0.01683	0.10098
Fisher_leaf_clr_cluster6_set10	0.9998	5.9988
Fisher_leaf_clr_cluster6_set12	0.554	3.324
Fisher_leaf_clr_cluster6_set15	0.9958	5.9748
Fisher_leaf_clr_cluster6_set17	0.01046	0.06276
Fisher_leaf_clr_cluster6_set18	0.9999	5.9994
Fisher_leaf_clr_cluster6_set20	1	6
Fisher_leaf_clr_cluster6_set21	0.0004031	0.0024186
Fisher_leaf_clr_cluster6_set22	2.588e-08	1.5528e-07
Fisher_leaf_clr_cluster6_set23	0.9594	5.7564
Fisher_leaf_clr_cluster6_set24	1	6
Fisher_leaf_clr_cluster6_set25	9.459e-10	5.6754e-09
Fisher_leaf_clr_cluster6_set26	0.7317	4.3902
Fisher_leaf_clr_cluster6_set27	1	6
Fisher_leaf_clr_cluster6_set28	1	6
Fisher_leaf_clr_cluster6_set30	0.9791	5.8746
Fisher_leaf_clr_cluster6_set32	1	6
Fisher_leaf_clr_cluster6_set34	0.8808	5.2848

## Sheet: S23
Table S23. Clusters of differentially expressed unigenes in Shorea curtisii leaf with significant enrichment of Arabidopsis thaliana gene sets.
Description of Arabidopsis thaliana gene set	Cluster
	1	3	4	6
Upregulated under severe drought condition	NS	4.2E–09	NS	NS
Downregulated under severe drought condition	NS	NS	NS	1.3E–15
Downregulated under prolonged moderate drought condition	NS	8.1E–12	NS	NS
Commonly upregulated under 41 abiotic and biotic stress conditions	NS	1.3E–15	NS	NS
Upregulated with abscisic acid treatment	NS	2.3E–07	NS	NS
Upregulated with indole-3-acetic acid treatment	NS	1.8E–09	NS	NS
Upregulated with jasmonic acid treatment	NS	6.5E–09	NS	NS
Upregulated with gibberellin treatment	NS	NS	NS	1.6E–07
Upregulated under carbon-limited condition	NS	NS	4.5E–13	NS
Downregulated under carbon-limited condition	NS	NS	NS	5.7E–09
Downregulated after the addition of sucrose	NS	NS	2.1E–14	NS
Upregulated under medium-term phosphate-limited condition	1.1E–04	NS	NS	NS
Fisher’s exact test P-value cut-off: 1E–03 after Bonferroni correction.
NS indicates not significant.

[truncated: 7 more sheets: S24, S25, S26, S27, S28, S29, S30]
