# Supplementary material for: An ecological transcriptome approach to capture the molecular and physiological mechanisms of mass flowering in Shorea curtisii
Source: PeerJ. 2023 Nov 29;11:e16368. doi: 10.7717/peerj.16368 (PMC10693236; doi:10.7717/peerj.16368)
Supplement: Supplemental Information 12 [file peerj-11-16368-s012.xlsx]

## Sheet: S31
Table S31. Classification of GO terms in the transcriptome of S. curtisii
CC: Cellular Compartment; MF: Molecular Function; BP: Biological Process
Category	GO.ID	GO term	No. of unigenes	% (over total unigenes)
CC	GO:0005623	cell	48070	74.8
CC	GO:0044464	cell part	48070	74.8
CC	GO:0044422	organelle part	16181	25.2
CC	GO:0043226	organelle	41376	64.4
CC	GO:0044425	membrane part	12668	19.7
CC	GO:0016020	membrane	19539	30.4
CC	GO:0032991	protein-containing complex	8545	13.3
CC	GO:0031974	membrane-enclosed lumen	3820	5.9
CC	GO:0099080	supramolecular complex	537	0.8
CC	GO:0005576	extracellular region	4998	7.8
CC	GO:0030054	cell junction	2877	4.5
CC	GO:0055044	symplast	2877	4.5
CC	GO:0009295	nucleoid	149	0.2
CC	GO:0044421	extracellular region part	237	0.4
MF	GO:0003824	catalytic activity	24601	38.3
MF	GO:0098772	molecular function regulator	897	1.4
MF	GO:0005215	transporter activity	4040	6.3
MF	GO:0005488	binding	28310	44.1
MF	GO:0060089	molecular transducer activity	850	1.3
MF	GO:0005198	structural molecule activity	1445	2.2
MF	GO:0016209	antioxidant activity	424	0.7
MF	GO:0140110	transcription regulator activity	3180	5
BP	GO:0051179	localization	6974	10.9
BP	GO:0065007	biological regulation	13761	21.4
BP	GO:0050896	response to stimulus	15838	24.7
BP	GO:0009987	cellular process	31502	49
BP	GO:0023052	signaling	4171	6.5
BP	GO:0050789	regulation of biological process	12136	18.9
BP	GO:0008152	metabolic process	29405	45.8
BP	GO:0048518	positive regulation of biological process	3172	4.9
BP	GO:0051704	multi-organism process	4234	6.6
BP	GO:0022414	reproductive process	5043	7.9
BP	GO:0032502	developmental process	8935	13.9
BP	GO:0032501	multicellular organismal process	8282	12.9
BP	GO:0000003	reproduction	5069	7.9
BP	GO:0048519	negative regulation of biological process	2981	4.6
BP	GO:0098754	detoxification	243	0.4
BP	GO:0002376	immune system process	1320	2.1
BP	GO:0071840	cellular component organization or biogenesis	8452	13.2
BP	GO:0040007	growth	1660	2.6
BP	GO:0040011	locomotion	161	0.3
BP	GO:0048511	rhythmic process	459	0.7
BP	GO:0008283	cell proliferation	263	0.4

## Sheet: S32
Table S32. Enriched GO terms in leaf DEUs of S. curtisii
CC: Cellular Compartment; MF: Molecular Function; BP: Biological Process
Category	GO.ID	Term	No. of Annotated Unigenes	P-value
CC	GO:0110165	cellular anatomical entity	411	4.9e-20
CC	GO:0005576	extracellular region	77	1.9e-13
CC	GO:0005575	cellular_component	418	7.4e-05
CC	GO:0000139	Golgi membrane	40	0.00053
CC	GO:0005615	extracellular space	3	0.00456
CC	GO:0005942	phosphatidylinositol 3-kinase complex	1	0.02492
CC	GO:0005943	phosphatidylinositol 3-kinase complex, class IA	1	0.02492
CC	GO:0097651	phosphatidylinositol 3-kinase complex, class I	1	0.02492
CC	GO:0000427	plastid-encoded plastid RNA polymerase complex	2	0.04030
MF	GO:0003674	molecular_function	1038	2.6e-23
MF	GO:0005515	protein binding	139	3.2e-07
MF	GO:0004601	peroxidase activity	26	1.2e-06
MF	GO:0004174	electron-transferring-flavoprotein dehydrogenase activity	3	2.7e-05
MF	GO:0004553	hydrolase activity, hydrolyzing O-glycosyl compounds	47	3.2e-05
MF	GO:0005506	iron ion binding	17	0.00018
MF	GO:0008194	UDP-glycosyltransferase activity	16	0.00040
MF	GO:0004565	beta-galactosidase activity	8	0.00041
MF	GO:0005509	calcium ion binding	17	0.00046
MF	GO:0004462	lactoylglutathione lyase activity	6	0.00075
MF	GO:0005199	structural constituent of cell wall	3	0.00086
MF	GO:0004096	catalase activity	4	0.00110
MF	GO:0004478	methionine adenosyltransferase activity	3	0.00135
MF	GO:0003777	microtubule motor activity	12	0.00174
MF	GO:0004064	arylesterase activity	3	0.00197
MF	GO:0003700	DNA-binding transcription factor activity	40	0.00223
MF	GO:0005452	inorganic anion exchanger activity	4	0.00320
MF	GO:0004252	serine-type endopeptidase activity	13	0.00677
MF	GO:0000156	phosphorelay response regulator activity	6	0.00907
MF	GO:0004356	glutamate-ammonia ligase activity	4	0.00929
MF	GO:0003677	DNA binding	112	0.01159
MF	GO:0016872	intramolecular lyase activity	2	0.01244
MF	GO:0004512	inositol-3-phosphate synthase activity	2	0.01244
MF	GO:0003855	3-dehydroquinate dehydratase activity	3	0.01336
MF	GO:0004373	glycogen (starch) synthase activity	4	0.01827
MF	GO:0004568	chitinase activity	2	0.02813
MF	GO:0004693	cyclin-dependent protein serine/threonine kinase activity	4	0.03130
MF	GO:0097472	cyclin-dependent protein kinase activity	4	0.03130
MF	GO:0003959	NADPH dehydrogenase activity	2	0.03448
MF	GO:0004354	glutamate dehydrogenase (NADP+) activity	2	0.03448
MF	GO:0017048	Rho GTPase binding	3	0.04190
MF	GO:0005088	Ras guanyl-nucleotide exchange factor activity	3	0.04190
MF	GO:0005089	Rho guanyl-nucleotide exchange factor activity	3	0.04190
MF	GO:0005516	calmodulin binding	11	0.04334
MF	GO:0004497	monooxygenase activity	14	0.04534
MF	GO:0005310	dicarboxylic acid transmembrane transporter activity	4	0.04544
MF	GO:0031267	small GTPase binding	3	0.04612
MF	GO:0017016	Ras GTPase binding	3	0.04612
MF	GO:0003913	DNA photolyase activity	2	0.04861
BP	GO:0008150	biological_process	173	7.5e-21
BP	GO:0000302	response to reactive oxygen species	22	5.5e-17
BP	GO:0001944	vasculature development	10	1.1e-11
BP	GO:0000272	polysaccharide catabolic process	10	8.4e-07
BP	GO:0000162	tryptophan biosynthetic process	7	1.6e-05
BP	GO:0000226	microtubule cytoskeleton organization	9	0.00015
BP	GO:0000413	protein peptidyl-prolyl isomerization	9	0.00025
BP	GO:0000122	negative regulation of transcription by RNA polymerase II	6	0.00039
BP	GO:0002229	defense response to oomycetes	7	0.00105
BP	GO:0000038	very long-chain fatty acid metabolic process	5	0.00131
BP	GO:0006817	phosphate ion transport	2	0.00157
BP	GO:0006805	xenobiotic metabolic process	3	0.00249
BP	GO:0000103	sulfate assimilation	4	0.00569
BP	GO:0003333	amino acid transmembrane transport	6	0.00687
BP	GO:0001666	response to hypoxia	5	0.00810
BP	GO:0000289	nuclear-transcribed mRNA poly(A) tail shortening	2	0.00892
BP	GO:0009628	response to abiotic stimulus	11	0.00921
BP	GO:0006457	protein folding	3	0.00949
BP	GO:0050896	response to stimulus	57	0.01980
BP	GO:0009414	response to water deprivation	2	0.02440
BP	GO:0009415	response to water	2	0.02440
BP	GO:0001101	response to acid chemical	2	0.02440
BP	GO:0000087	mitotic M phase	1	0.03253
BP	GO:0035556	intracellular signal transduction	4	0.03600
BP	GO:0023014	signal transduction by protein phosphorylation	3	0.03721
BP	GO:0000165	MAPK cascade	3	0.03721
BP	GO:0009416	response to light stimulus	3	0.03934
BP	GO:0006468	protein phosphorylation	6	0.04111
BP	GO:0009314	response to radiation	3	0.04153
BP	GO:0006950	response to stress	44	0.04589
BP	GO:0016310	phosphorylation	6	0.04679

## Sheet: S33
Table S33. Enriched GO terms in bud DEUs of S. curtisii
CC: Cellular Compartment; MF: Molecular Function; BP: Biological Process
Category	GO.ID	Term	No. of Annotated Unigenes	P-value
CC	GO:0110165	cellular anatomical entity	845	< 1e-30
CC	GO:0005576	extracellular region	164	1.1e-29
CC	GO:0000786	nucleosome	20	1.5e-11
CC	GO:0005575	cellular_component	860	1.3e-09
CC	GO:0005618	cell wall	13	1.9e-06
CC	GO:0005615	extracellular space	6	3.8e-05
CC	GO:0000148	1,3-beta-D-glucan synthase complex	8	0.00039
CC	GO:0000793	condensed chromosome	11	0.00056
CC	GO:0000427	plastid-encoded plastid RNA polymerase complex	4	0.00338
CC	GO:0071944	cell periphery	68	0.00460
CC	GO:0000776	kinetochore	7	0.00952
CC	GO:0005829	cytosol	25	0.01045
CC	GO:0000779	condensed chromosome, centromeric region	6	0.01208
CC	GO:0000347	THO complex	5	0.01287
CC	GO:0005783	endoplasmic reticulum	20	0.01364
CC	GO:0005886	plasma membrane	48	0.02200
CC	GO:0000145	exocyst	7	0.04806
CC	GO:0099023	vesicle tethering complex	8	0.04900
MF	GO:0003674	molecular_function	2130	< 1e-30
MF	GO:0003777	microtubule motor activity	39	5.0e-15
MF	GO:0003677	DNA binding	297	2.2e-11
MF	GO:0000977	RNA polymerase II transcription regulatory region sequence-specific DNA binding	38	3.0e-10
MF	GO:0004553	hydrolase activity, hydrolyzing O-glycosyl compounds	90	2.1e-09
MF	GO:0005507	copper ion binding	44	1.5e-07
MF	GO:0004601	peroxidase activity	40	3.5e-07
MF	GO:0000900	translation repressor activity, mRNA regulatory element binding	7	2.0e-06
MF	GO:0005506	iron ion binding	28	7.7e-05
MF	GO:0004064	arylesterase activity	5	9.0e-05
MF	GO:0003878	ATP citrate synthase activity	5	0.00048
MF	GO:0005524	ATP binding	72	0.00074
MF	GO:0005516	calmodulin binding	25	0.00076
MF	GO:0004478	methionine adenosyltransferase activity	4	0.00082
MF	GO:0004352	glutamate dehydrogenase (NAD+) activity	3	0.00089
MF	GO:0005504	fatty acid binding	5	0.00157
MF	GO:0004096	catalase activity	5	0.00217
MF	GO:0003700	DNA-binding transcription factor activity	71	0.00286
MF	GO:0004565	beta-galactosidase activity	10	0.00341
MF	GO:0004497	monooxygenase activity	29	0.00463
MF	GO:0005515	protein binding	231	0.00470
MF	GO:0003849	3-deoxy-7-phosphoheptulonate synthase activity	5	0.00494
MF	GO:0000987	cis-regulatory region sequence-specific DNA binding	10	0.00549
MF	GO:0004356	glutamate-ammonia ligase activity	6	0.00629
MF	GO:0008194	UDP-glycosyltransferase activity	22	0.00644
MF	GO:0004475	mannose-1-phosphate guanylyltransferase activity	3	0.00676
MF	GO:0005452	inorganic anion exchanger activity	5	0.00780
MF	GO:0005262	calcium channel activity	5	0.00780
MF	GO:0004185	serine-type carboxypeptidase activity	16	0.00837
MF	GO:0003825	alpha,alpha-trehalose-phosphate synthase (UDP-forming) activity	3	0.01032
MF	GO:0004842	ubiquitin-protein transferase activity	48	0.01632
MF	GO:0019787	ubiquitin-like protein transferase activity	48	0.01680
MF	GO:0017171	serine hydrolase activity	36	0.01878
MF	GO:0008236	serine-type peptidase activity	36	0.01878
MF	GO:0005310	dicarboxylic acid transmembrane transporter activity	7	0.01923
MF	GO:0004252	serine-type endopeptidase activity	20	0.01945
MF	GO:0004354	glutamate dehydrogenase (NADP+) activity	3	0.02015
MF	GO:0016813	hydrolase activity, acting on carbon-nitrogen (but not peptide) bonds, in linear amidines	2	0.02090
MF	GO:0004668	protein-arginine deiminase activity	2	0.02090
MF	GO:0001067	regulatory region nucleic acid binding	49	0.02562
MF	GO:0000976	transcription regulatory region sequence-specific DNA binding	49	0.02562
MF	GO:0005548	phospholipid transporter activity	4	0.02637
MF	GO:1990837	sequence-specific double-stranded DNA binding	49	0.02805
MF	GO:0000978	RNA polymerase II cis-regulatory region sequence-specific DNA binding	7	0.02947
MF	GO:0000156	phosphorelay response regulator activity	8	0.03004
MF	GO:0004106	chorismate mutase activity	2	0.03342
MF	GO:0003838	sterol 24-C-methyltransferase activity	2	0.03342
MF	GO:0005459	UDP-galactose transmembrane transporter activity	3	0.03369
MF	GO:0015165	pyrimidine nucleotide-sugar transmembrane transporter activity	3	0.03369
MF	GO:0004650	polygalacturonase activity	10	0.03834
MF	GO:0004512	inositol-3-phosphate synthase activity	2	0.04811
MF	GO:0016872	intramolecular lyase activity	2	0.04811
MF	GO:0046943	carboxylic acid transmembrane transporter activity	8	0.04900
MF	GO:0005342	organic acid transmembrane transporter activity	8	0.04900
BP	GO:0008150	biological_process	319	< 1e-30
BP	GO:0000302	response to reactive oxygen species	23	2.4e-12
BP	GO:0000079	regulation of cyclin-dependent protein serine/threonine kinase activity	17	2.1e-09
BP	GO:0000272	polysaccharide catabolic process	15	1.9e-08
BP	GO:0001666	response to hypoxia	14	5.1e-08
BP	GO:0000914	phragmoplast assembly	4	4.0e-06
BP	GO:0000413	protein peptidyl-prolyl isomerization	15	7.0e-06
BP	GO:0001944	vasculature development	7	1.5e-05
BP	GO:0000162	tryptophan biosynthetic process	9	1.6e-05
BP	GO:0002237	response to molecule of bacterial origin	9	0.00012
BP	GO:0000132	establishment of mitotic spindle orientation	3	0.00026
BP	GO:0000226	microtubule cytoskeleton organization	14	0.00065
BP	GO:0000910	cytokinesis	16	0.00069
BP	GO:0016042	lipid catabolic process	3	0.00088
BP	GO:0006805	xenobiotic metabolic process	4	0.00143
BP	GO:0009628	response to abiotic stimulus	26	0.00191
BP	GO:0035556	intracellular signal transduction	8	0.00202
BP	GO:0000038	very long-chain fatty acid metabolic process	6	0.00378
BP	GO:0000281	mitotic cytokinesis	6	0.00513
BP	GO:0006952	defense response	18	0.00851
BP	GO:0000122	negative regulation of transcription by RNA polymerase II	6	0.00855
BP	GO:0000080	mitotic G1 phase	2	0.00858
BP	GO:0002229	defense response to oomycetes	8	0.00899
BP	GO:0055085	transmembrane transport	10	0.00948
BP	GO:0009414	response to water deprivation	3	0.00951
BP	GO:0000165	MAPK cascade	5	0.01112
BP	GO:0023014	signal transduction by protein phosphorylation	5	0.01112
BP	GO:0032502	developmental process	22	0.01213
BP	GO:0009416	response to light stimulus	5	0.01217
BP	GO:0005976	polysaccharide metabolic process	18	0.01219
BP	GO:0005982	starch metabolic process	2	0.01261
BP	GO:0003333	amino acid transmembrane transport	8	0.01267
BP	GO:0009314	response to radiation	5	0.01329
BP	GO:1905039	carboxylic acid transmembrane transport	8	0.01338
BP	GO:1903825	organic acid transmembrane transport	8	0.01338
BP	GO:0006820	anion transport	9	0.01412
BP	GO:0098656	anion transmembrane transport	8	0.01488
BP	GO:0051304	chromosome separation	2	0.01731
BP	GO:0051307	meiotic chromosome separation	2	0.01731
BP	GO:0000712	resolution of meiotic recombination intermediates	2	0.01731
BP	GO:0034220	ion transmembrane transport	8	0.01916
BP	GO:0006865	amino acid transport	8	0.02012
BP	GO:0046942	carboxylic acid transport	8	0.02212
BP	GO:0015849	organic acid transport	8	0.02212
BP	GO:0035825	homologous recombination	2	0.02262
BP	GO:0007131	reciprocal meiotic recombination	2	0.02262
BP	GO:0048285	organelle fission	8	0.02317
BP	GO:0071702	organic substance transport	11	0.02485
BP	GO:0015711	organic anion transport	8	0.02539
BP	GO:0000289	nuclear-transcribed mRNA poly(A) tail shortening	2	0.02851
BP	GO:0044042	glucan metabolic process	2	0.02851
BP	GO:0006073	cellular glucan metabolic process	2	0.02851
BP	GO:0007127	meiosis I	2	0.02851
BP	GO:0045165	cell fate commitment	4	0.02938
BP	GO:0009269	response to desiccation	1	0.03024
BP	GO:0000280	nuclear division	5	0.03041
BP	GO:0006468	protein phosphorylation	22	0.03102
BP	GO:0050896	response to stimulus	101	0.03376
BP	GO:0009409	response to cold	3	0.03465
BP	GO:0045132	meiotic chromosome segregation	2	0.03494
BP	GO:0045937	positive regulation of phosphate metabolic process	2	0.03494
BP	GO:0033674	positive regulation of kinase activity	2	0.03494
BP	GO:0032147	activation of protein kinase activity	2	0.03494
BP	GO:0000187	activation of MAPK activity	2	0.03494
BP	GO:0043410	positive regulation of MAPK cascade	2	0.03494
BP	GO:0001934	positive regulation of protein phosphorylation	2	0.03494
BP	GO:0071902	positive regulation of protein serine/threonine kinase activity	2	0.03494
BP	GO:1902533	positive regulation of intracellular signal transduction	2	0.03494
BP	GO:0043406	positive regulation of MAP kinase activity	2	0.03494
BP	GO:0010562	positive regulation of phosphorus metabolic process	2	0.03494
BP	GO:0045860	positive regulation of protein kinase activity	2	0.03494
BP	GO:0042327	positive regulation of phosphorylation	2	0.03494
BP	GO:0000160	phosphorelay signal transduction system	3	0.03852
BP	GO:0098813	nuclear chromosome segregation	4	0.04017
BP	GO:0016310	phosphorylation	22	0.04155
BP	GO:0051347	positive regulation of transferase activity	2	0.04186
BP	GO:0044264	cellular polysaccharide metabolic process	2	0.04186
BP	GO:0000103	sulfate assimilation	4	0.04317
BP	GO:0006457	protein folding	3	0.04689
BP	GO:0023056	positive regulation of signaling	2	0.04925
BP	GO:0009967	positive regulation of signal transduction	2	0.04925
BP	GO:0051247	positive regulation of protein metabolic process	2	0.04925
BP	GO:0010647	positive regulation of cell communication	2	0.04925
BP	GO:0032270	positive regulation of cellular protein metabolic process	2	0.04925
BP	GO:0031401	positive regulation of protein modification process	2	0.04925
BP	GO:0043085	positive regulation of catalytic activity	2	0.04925
BP	GO:0007059	chromosome segregation	4	0.04955

## Sheet: S34
Table S34. Enriched GO terms in leaf DEU clusters of S. curtisii
CC: Cellular Compartment; MF: Molecular Function; BP: Biological Process
Category	GO.ID	Term	No. of Annotated Unigenes	P-value	Cluster
BP	GO:0008150	biological_process	29	1.5e-06	4
BP	GO:0008150	biological_process	47	5.5e-08	6
BP	GO:0008150	biological_process	32	9.4e-05	5
BP	GO:0008150	biological_process	30	0.00660	3
BP	GO:0050896	response to stimulus	10	0.01688	4
BP	GO:0008150	biological_process	27	9.2e-05	1
BP	GO:0006950	response to stress	12	0.0402	5
BP	GO:0050896	response to stimulus	12	0.03596	6
BP	GO:0006950	response to stress	8	0.04584	4
BP	GO:0000302	response to reactive oxygen species	4	0.00035	4
BP	GO:0006820	anion transport	4	0.03859	4
BP	GO:0000413	protein peptidyl-prolyl isomerization	9	9.5e-11	5
BP	GO:0000226	microtubule cytoskeleton organization	9	2.2e-09	6
BP	GO:0001944	vasculature development	8	4.6e-15	3
BP	GO:0006817	phosphate ion transport	2	4.4e-05	4
BP	GO:0000302	response to reactive oxygen species	8	2.6e-09	5
BP	GO:0000302	response to reactive oxygen species	7	4.5e-08	3
BP	GO:0019752	carboxylic acid metabolic process	7	0.03255	6
BP	GO:0006082	organic acid metabolic process	7	0.03502	6
BP	GO:0043436	oxoacid metabolic process	7	0.03502	6
BP	GO:0007049	cell cycle	7	0.04022	6
BP	GO:0000103	sulfate assimilation	2	0.00643	4
BP	GO:0000122	negative regulation of transcription by RNA polymerase II	4	1.4e-05	1
BP	GO:0000272	polysaccharide catabolic process	4	5.2e-05	1
BP	GO:0050896	response to stimulus	4	0.0044	2
BP	GO:0000162	tryptophan biosynthetic process	2	0.00824	4
BP	GO:0002239	response to oomycetes	2	0.02892	4
BP	GO:0002229	defense response to oomycetes	2	0.02892	4
BP	GO:0003333	amino acid transmembrane transport	2	0.03229	4
BP	GO:1905039	carboxylic acid transmembrane transport	2	0.03287	4
BP	GO:1903825	organic acid transmembrane transport	2	0.03287	4
BP	GO:0000038	very long-chain fatty acid metabolic process	4	6.9e-05	6
BP	GO:0001666	response to hypoxia	4	0.00035	6
BP	GO:0022402	cell cycle process	4	0.01266	6
BP	GO:0006952	defense response	4	0.02054	6
BP	GO:0000162	tryptophan biosynthetic process	3	0.00027	1
BP	GO:0000302	response to reactive oxygen species	3	0.00386	1
BP	GO:0006950	response to stress	3	0.0126	2
BP	GO:0000165	MAPK cascade	3	0.00027	3
BP	GO:0005975	carbohydrate metabolic process	3	0.00607	3
BP	GO:0098656	anion transmembrane transport	2	0.03404	4
BP	GO:0034220	ion transmembrane transport	2	0.03703	4
BP	GO:0006952	defense response	3	0.0340	5
BP	GO:0000272	polysaccharide catabolic process	3	0.00574	6
BP	GO:0000079	regulation of cyclin-dependent protein serine/threonine kinase activity	3	0.00813	6
BP	GO:0055085	transmembrane transport	3	0.02380	6
BP	GO:0003333	amino acid transmembrane transport	2	0.02827	1
BP	GO:1905039	carboxylic acid transmembrane transport	2	0.02878	1
BP	GO:1903825	organic acid transmembrane transport	2	0.02878	1
BP	GO:0098656	anion transmembrane transport	2	0.02981	1
BP	GO:0034220	ion transmembrane transport	2	0.03245	1
BP	GO:0006865	amino acid transport	2	0.03299	1
BP	GO:0046942	carboxylic acid transport	2	0.03408	1
BP	GO:0015849	organic acid transport	2	0.03408	1
BP	GO:0015711	organic anion transport	2	0.03574	1
BP	GO:0006820	anion transport	2	0.04089	1
BP	GO:0055085	transmembrane transport	2	0.04881	1
BP	GO:0042221	response to chemical	2	0.0209	2
BP	GO:0000289	nuclear-transcribed mRNA poly(A) tail shortening	2	0.00028	3
BP	GO:0002237	response to molecule of bacterial origin	2	0.01413	3
BP	GO:0009617	response to bacterium	2	0.02204	3
BP	GO:0000272	polysaccharide catabolic process	2	0.02255	3
BP	GO:0016052	carbohydrate catabolic process	2	0.02359	3
BP	GO:0005976	polysaccharide metabolic process	2	0.03198	3
BP	GO:0010033	response to organic substance	2	0.04402	3
BP	GO:0006865	amino acid transport	2	0.03764	4
BP	GO:0046942	carboxylic acid transport	2	0.03887	4
BP	GO:0015849	organic acid transport	2	0.03887	4
BP	GO:0015711	organic anion transport	2	0.04075	4
BP	GO:0048511	rhythmic process	1	0.01638	4
BP	GO:0007623	circadian rhythm	1	0.01638	4
BP	GO:0008299	isoprenoid biosynthetic process	1	0.03251	4
BP	GO:0006720	isoprenoid metabolic process	1	0.03517	4
BP	GO:0006290	pyrimidine dimer repair	1	0.03783	4
BP	GO:0000719	photoreactive repair	1	0.03783	4
BP	GO:0006805	xenobiotic metabolic process	1	0.04575	4
BP	GO:0071466	cellular response to xenobiotic stimulus	1	0.04575	4
BP	GO:0009410	response to xenobiotic stimulus	1	0.04575	4
BP	GO:0000967	rRNA 5'-end processing	1	0.04838	4
BP	GO:0000103	sulfate assimilation	2	0.0078	5
BP	GO:0009416	response to light stimulus	2	0.01775	6
BP	GO:0009314	response to radiation	2	0.01849	6
BP	GO:0006586	indolalkylamine metabolic process	2	0.02078	6
BP	GO:0009308	amine metabolic process	2	0.02078	6
BP	GO:0009309	amine biosynthetic process	2	0.02078	6
BP	GO:0006576	cellular biogenic amine metabolic process	2	0.02078	6
BP	GO:0046219	indolalkylamine biosynthetic process	2	0.02078	6
BP	GO:0042401	cellular biogenic amine biosynthetic process	2	0.02078	6
BP	GO:0000162	tryptophan biosynthetic process	2	0.02078	6
BP	GO:0044106	cellular amine metabolic process	2	0.02078	6
BP	GO:0006568	tryptophan metabolic process	2	0.02078	6
BP	GO:0042435	indole-containing compound biosynthetic process	2	0.02236	6
BP	GO:0042430	indole-containing compound metabolic process	2	0.02317	6
BP	GO:0006805	xenobiotic metabolic process	1	0.04266	1
BP	GO:0071466	cellular response to xenobiotic stimulus	1	0.04266	1
BP	GO:0009410	response to xenobiotic stimulus	1	0.04266	1
BP	GO:0000055	ribosomal large subunit export from nucleus	1	0.0098	2
BP	GO:0001101	response to acid chemical	1	0.0113	2
BP	GO:0009414	response to water deprivation	1	0.0113	2
BP	GO:0009415	response to water	1	0.0113	2
BP	GO:0009410	response to xenobiotic stimulus	1	0.0128	2
BP	GO:0071466	cellular response to xenobiotic stimulus	1	0.0128	2
BP	GO:0006805	xenobiotic metabolic process	1	0.0128	2
BP	GO:0006457	protein folding	1	0.0203	2
BP	GO:0070887	cellular response to chemical stimulus	1	0.0344	2
BP	GO:0010035	response to inorganic substance	1	0.0351	2
BP	GO:0000038	very long-chain fatty acid metabolic process	1	0.0373	2
BP	GO:1902533	positive regulation of intracellular signal transduction	1	0.02809	3
BP	GO:0043406	positive regulation of MAP kinase activity	1	0.02809	3
BP	GO:0045860	positive regulation of protein kinase activity	1	0.02809	3
BP	GO:0042327	positive regulation of phosphorylation	1	0.02809	3
BP	GO:0071902	positive regulation of protein serine/threonine kinase activity	1	0.02809	3
BP	GO:0000187	activation of MAPK activity	1	0.02809	3
BP	GO:0001934	positive regulation of protein phosphorylation	1	0.02809	3
BP	GO:0043410	positive regulation of MAPK cascade	1	0.02809	3
BP	GO:0045937	positive regulation of phosphate metabolic process	1	0.02809	3
BP	GO:0032147	activation of protein kinase activity	1	0.02809	3
BP	GO:0010562	positive regulation of phosphorus metabolic process	1	0.02809	3
BP	GO:0033674	positive regulation of kinase activity	1	0.02809	3
BP	GO:0051347	positive regulation of transferase activity	1	0.03085	3
BP	GO:0032270	positive regulation of cellular protein metabolic process	1	0.03361	3
BP	GO:0043085	positive regulation of catalytic activity	1	0.03361	3
BP	GO:0009967	positive regulation of signal transduction	1	0.03361	3
BP	GO:0023056	positive regulation of signaling	1	0.03361	3
BP	GO:0051247	positive regulation of protein metabolic process	1	0.03361	3
BP	GO:0031401	positive regulation of protein modification process	1	0.03361	3
BP	GO:0010647	positive regulation of cell communication	1	0.03361	3
BP	GO:0043405	regulation of MAP kinase activity	1	0.03636	3
BP	GO:0043408	regulation of MAPK cascade	1	0.03636	3
BP	GO:0044093	positive regulation of molecular function	1	0.03636	3
BP	GO:1902531	regulation of intracellular signal transduction	1	0.04184	3
BP	GO:0010604	positive regulation of macromolecule metabolic process	1	0.04729	3
BP	GO:0051173	positive regulation of nitrogen compound metabolic process	1	0.04729	3
BP	GO:0009555	pollen development	1	0.0121	5
BP	GO:0048229	gametophyte development	1	0.0181	5
BP	GO:0002215	defense response to nematode	1	0.0387	5
BP	GO:0001101	response to acid chemical	1	0.0446	5
BP	GO:0009414	response to water deprivation	1	0.0446	5
BP	GO:0009415	response to water	1	0.0446	5
BP	GO:0000087	mitotic M phase	1	0.00889	6
BP	GO:0002943	tRNA dihydrouridine synthesis	1	0.01770	6
BP	GO:0000132	establishment of mitotic spindle orientation	1	0.02208	6
BP	GO:0051293	establishment of spindle localization	1	0.02208	6
BP	GO:0051294	establishment of spindle orientation	1	0.02208	6
BP	GO:0007163	establishment or maintenance of cell polarity	1	0.02208	6
BP	GO:0040001	establishment of mitotic spindle localization	1	0.02208	6
BP	GO:0051653	spindle localization	1	0.02208	6
BP	GO:1902850	microtubule cytoskeleton organization involved in mitosis	1	0.02208	6
BP	GO:0030010	establishment of cell polarity	1	0.02208	6
BP	GO:0051304	chromosome separation	1	0.03078	6
BP	GO:0051307	meiotic chromosome separation	1	0.03078	6
BP	GO:0000712	resolution of meiotic recombination intermediates	1	0.03078	6
BP	GO:0035825	homologous recombination	1	0.03510	6
BP	GO:0007131	reciprocal meiotic recombination	1	0.03510	6
BP	GO:0007127	meiosis I	1	0.03940	6
BP	GO:0045132	meiotic chromosome segregation	1	0.04369	6
CC	GO:0110165	cellular anatomical entity	57	0.0012	1
CC	GO:0000325	plant-type vacuole	3	0.0230	1
CC	GO:0005622	intracellular	50	0.0277	1
CC	GO:0110165	cellular anatomical entity	31	0.0028	2
CC	GO:0110165	cellular anatomical entity	44	0.00058	3
CC	GO:0005615	extracellular space	2	0.00060	3
CC	GO:0000145	exocyst	3	0.00066	3
CC	GO:0110165	cellular anatomical entity	62	2.9e-05	4
CC	GO:0009507	chloroplast	10	0.00067	4
CC	GO:0000785	chromatin	3	0.02937	4
CC	GO:0005777	peroxisome	2	0.04639	4
CC	GO:0042579	microbody	2	0.04639	4
CC	GO:0000427	plastid-encoded plastid RNA polymerase complex	2	0.00038	5
CC	GO:0005829	cytosol	4	0.00443	5
CC	GO:0005575	cellular_component	38	0.01121	5
CC	GO:0005576	extracellular region	53	7.5e-19	6
CC	GO:0000139	Golgi membrane	29	3.2e-07	6
CC	GO:0110165	cellular anatomical entity	181	9.0e-07	6
CC	GO:0005618	cell wall	4	0.0027	6
CC	GO:0005942	phosphatidylinositol 3-kinase complex	1	0.0110	6
CC	GO:0005943	phosphatidylinositol 3-kinase complex, class IA	1	0.0110	6
CC	GO:0097651	phosphatidylinositol 3-kinase complex, class I	1	0.0110	6
CC	GO:0005575	cellular_component	184	0.0170	6
MF	GO:0003674	molecular_function	342	6.1e-07	6
MF	GO:0003674	molecular_function	219	2.6e-05	3
MF	GO:0003674	molecular_function	141	0.00170	1
MF	GO:0005488	binding	108	0.02590	3
MF	GO:0003674	molecular_function	99	0.0021	5
MF	GO:0003674	molecular_function	79	0.0199	2
MF	GO:0005515	protein binding	52	0.0003	6
MF	GO:0003677	DNA binding	46	3.6e-07	3
MF	GO:0004553	hydrolase activity, hydrolyzing O-glycosyl compounds	38	3.4e-11	6
MF	GO:0004672	protein kinase activity	29	0.0402	6
MF	GO:0005515	protein binding	28	0.02785	3
MF	GO:0046914	transition metal ion binding	17	0.0336	6
MF	GO:0005515	protein binding	16	0.0012	2
MF	GO:0004601	peroxidase activity	15	2.1e-08	6
MF	GO:0004842	ubiquitin-protein transferase activity	11	0.00105	3
MF	GO:0003700	DNA-binding transcription factor activity	10	0.00211	1
MF	GO:0003700	DNA-binding transcription factor activity	10	0.03813	3
MF	GO:0003777	microtubule motor activity	10	2.4e-06	6
MF	GO:0005507	copper ion binding	10	0.0010	6
MF	GO:0004565	beta-galactosidase activity	8	1.4e-07	6
MF	GO:0008233	peptidase activity	7	0.0483	5
MF	GO:0004252	serine-type endopeptidase activity	7	0.0036	6
MF	GO:0008194	UDP-glycosyltransferase activity	6	0.00018	1
MF	GO:0005351	carbohydrate:proton symporter activity	6	0.00079	1
MF	GO:0004497	monooxygenase activity	6	0.00107	1
MF	GO:0005509	calcium ion binding	6	0.00314	3
MF	GO:0005506	iron ion binding	6	0.0174	6
MF	GO:0005509	calcium ion binding	5	0.00230	1
MF	GO:0004722	protein serine/threonine phosphatase activity	5	0.01261	3
MF	GO:0019199	transmembrane receptor protein kinase activity	5	0.0115	6
MF	GO:0004675	transmembrane receptor protein serine/threonine kinase activity	5	0.0115	6
MF	GO:0004888	transmembrane signaling receptor activity	5	0.0458	6
MF	GO:0000987	cis-regulatory region sequence-specific DNA binding	4	0.00074	3
MF	GO:0005516	calmodulin binding	4	0.04056	3
MF	GO:0008236	serine-type peptidase activity	4	0.0152	5
MF	GO:0017171	serine hydrolase activity	4	0.0152	5
MF	GO:0004650	polygalacturonase activity	4	0.0106	6
MF	GO:0070001	aspartic-type peptidase activity	4	0.0454	6
MF	GO:0004190	aspartic-type endopeptidase activity	4	0.0454	6
MF	GO:0004096	catalase activity	3	3.6e-05	1
MF	GO:0004022	alcohol dehydrogenase (NAD+) activity	3	0.00126	1
MF	GO:0004364	glutathione transferase activity	3	0.00847	1
MF	GO:0004033	aldo-keto reductase (NADP) activity	3	0.00870	1
MF	GO:0005506	iron ion binding	3	0.0120	2
MF	GO:0030234	enzyme regulator activity	3	0.0259	2
MF	GO:0004174	electron-transferring-flavoprotein dehydrogenase activity	3	2.5e-07	3
MF	GO:0004693	cyclin-dependent protein serine/threonine kinase activity	3	0.00208	3
MF	GO:0004252	serine-type endopeptidase activity	3	0.0191	5
MF	GO:0008238	exopeptidase activity	3	0.0252	5
MF	GO:0005509	calcium ion binding	3	0.0267	5
MF	GO:0005199	structural constituent of cell wall	3	3.3e-05	6
MF	GO:0004478	methionine adenosyltransferase activity	3	5.2e-05	6
MF	GO:0005089	Rho guanyl-nucleotide exchange factor activity	3	0.0021	6
MF	GO:0004462	lactoylglutathione lyase activity	3	0.0058	6
MF	GO:0004512	inositol-3-phosphate synthase activity	2	7.7e-05	2
MF	GO:0004645	1,4-alpha-oligoglucan phosphorylase activity	2	0.0011	2
MF	GO:0015276	ligand-gated ion channel activity	2	0.0092	2
MF	GO:0004857	enzyme inhibitor activity	2	0.0181	2
MF	GO:0005227	calcium activated cation channel activity	2	0.01172	3
MF	GO:0022839	ion gated channel activity	2	0.01172	3
MF	GO:0005310	dicarboxylic acid transmembrane transporter activity	2	0.03303	3
MF	GO:0000978	RNA polymerase II cis-regulatory region sequence-specific DNA binding	2	0.03860	3
MF	GO:0005388	calcium transmembrane transporter activity, phosphorylative mechanism	2	0.04912	3
MF	GO:0003674	molecular_function	158	0.00022	4
MF	GO:0003700	DNA-binding transcription factor activity	9	0.01382	4
MF	GO:0140110	transcription regulator activity	9	0.02630	4
MF	GO:0000156	phosphorelay response regulator activity	6	3.4e-07	4
MF	GO:0005452	inorganic anion exchanger activity	4	2.4e-06	4
MF	GO:0004373	glycogen (starch) synthase activity	4	1.7e-05	4
MF	GO:0004568	chitinase activity	2	0.0033	6
MF	GO:0004064	arylesterase activity	2	0.0033	6
MF	GO:0005504	fatty acid binding	2	0.0094	6
MF	GO:0003855	3-dehydroquinate dehydratase activity	2	0.0120	6
MF	GO:0004356	glutamate-ammonia ligase activity	2	0.0311	6
MF	GO:0016880	acid-ammonia (or amide) ligase activity	2	0.0311	6
MF	GO:0016211	ammonia ligase activity	2	0.0311	6
MF	GO:0004615	phosphomannomutase activity	1	0.03214	1
MF	GO:0016868	intramolecular transferase activity, phosphotransferases	1	0.03608	1
MF	GO:0004665	prephenate dehydrogenase (NADP+) activity	1	0.0159	2
MF	GO:0003913	DNA photolyase activity	1	0.0271	2
MF	GO:0005242	inward rectifier potassium channel activity	1	0.0293	2
MF	GO:0016628	oxidoreductase activity, acting on the CH-CH group of donors, NAD or NADP as acceptor	1	0.0337	2
MF	GO:0099094	ligand-gated cation channel activity	1	0.0359	2
MF	GO:0003855	3-dehydroquinate dehydratase activity	1	0.0381	2
MF	GO:0003849	3-deoxy-7-phosphoheptulonate synthase activity	1	0.0425	2
MF	GO:0004143	diacylglycerol kinase activity	1	0.02508	3
MF	GO:0004103	choline kinase activity	1	0.04953	3
MF	GO:0005315	inorganic phosphate transmembrane transporter activity	4	0.00072	4
MF	GO:0005506	iron ion binding	4	0.01522	4
MF	GO:0004028	3-chloroallyl aldehyde dehydrogenase activity	3	0.02653	4
MF	GO:0016620	oxidoreductase activity, acting on the aldehyde or oxo group of donors, NAD or NADP as acceptor	3	0.04325	4
MF	GO:0003959	NADPH dehydrogenase activity	2	0.00091	4
MF	GO:0000293	ferric-chelate reductase activity	2	0.00724	4
MF	GO:0004124	cysteine synthase activity	2	0.00776	4
MF	GO:0004462	lactoylglutathione lyase activity	2	0.01242	4
MF	GO:0016638	oxidoreductase activity, acting on the CH-NH2 group of donors	2	0.01729	4
MF	GO:0016846	carbon-sulfur lyase activity	2	0.02452	4
MF	GO:0004760	serine-pyruvate transaminase activity	1	0.02709	4
MF	GO:0004354	glutamate dehydrogenase (NADP+) activity	1	0.04474	4
MF	GO:0003865	3-oxo-5-alpha-steroid 4-dehydrogenase activity	1	0.04910	4
MF	GO:0033765	steroid dehydrogenase activity, acting on the CH-CH group of donors	1	0.04910	4
MF	GO:0004106	chorismate mutase activity	1	0.0142	5
MF	GO:0004181	metallocarboxypeptidase activity	1	0.0142	5
MF	GO:0008235	metalloexopeptidase activity	1	0.0170	5
MF	GO:0004485	methylcrotonoyl-CoA carboxylase activity	1	0.0227	5
MF	GO:0001671	ATPase activator activity	1	0.0227	5
MF	GO:0004853	uroporphyrinogen decarboxylase activity	1	0.0227	5
MF	GO:0004326	tetrahydrofolylpolyglutamate synthase activity	1	0.0255	5
MF	GO:0004354	glutamate dehydrogenase (NADP+) activity	1	0.0282	5
MF	GO:0003883	CTP synthase activity	1	0.0282	5
MF	GO:0004148	dihydrolipoyl dehydrogenase activity	1	0.0310	5
MF	GO:0004664	prephenate dehydratase activity	1	0.0310	5
MF	GO:0016866	intramolecular transferase activity	1	0.0393	5
MF	GO:0003838	sterol 24-C-methyltransferase activity	1	0.0485	6
MF	GO:0004623	phospholipase A2 activity	1	0.0485	6

## Sheet: S35
Table S35. Enriched GO terms in bud DEU clusters of S. curtisii
CC: Cellular Compartment; MF: Molecular Function; BP: Biological Process
Category	GO.ID	Term	No. of Annotated Unigenes	P-value	Cluster
CC	GO:0000427	plastid-encoded plastid RNA polymerase complex	4	5.8e-07	1
CC	GO:0110165	cellular anatomical entity	92	2.3e-06	1
CC	GO:0005576	extracellular region	20	7.4e-06	1
CC	GO:0000325	plant-type vacuole	6	0.00038	1
CC	GO:0042175	nuclear outer membrane-endoplasmic reticulum membrane network	3	0.01370	1
CC	GO:0005789	endoplasmic reticulum membrane	3	0.01370	1
CC	GO:0005788	endoplasmic reticulum lumen	1	0.01636	1
CC	GO:0043073	germ cell nucleus	1	0.04305	1
CC	GO:0001673	male germ cell nucleus	1	0.04305	1
MF	GO:0000977	RNA polymerase II transcription regulatory region sequence-specific DNA binding	23	7.3e-20	1
MF	GO:0003677	DNA binding	64	1.6e-06	1
MF	GO:0003674	molecular_function	251	9.2e-06	1
MF	GO:0004497	monooxygenase activity	9	0.00023	1
MF	GO:0003857	3-hydroxyacyl-CoA dehydrogenase activity	2	0.00388	1
MF	GO:0005504	fatty acid binding	2	0.00517	1
MF	GO:0000978	RNA polymerase II cis-regulatory region sequence-specific DNA binding	3	0.00543	1
MF	GO:0000774	adenyl-nucleotide exchange factor activity	2	0.00826	1
MF	GO:0004601	peroxidase activity	6	0.00838	1
MF	GO:0005262	calcium channel activity	2	0.01005	1
MF	GO:0016639	oxidoreductase activity, acting on the CH-NH2 group of donors, NAD or NADP as acceptor	2	0.01100	1
MF	GO:0004353	glutamate dehydrogenase [NAD(P)+] activity	2	0.01100	1
MF	GO:0004650	polygalacturonase activity	3	0.02483	1
MF	GO:0004784	superoxide dismutase activity	2	0.02524	1
MF	GO:0016721	oxidoreductase activity, acting on superoxide radicals as acceptor	2	0.02524	1
MF	GO:0016670	oxidoreductase activity, acting on a sulfur group of donors, oxygen as acceptor	1	0.02870	1
MF	GO:0001735	prenylcysteine oxidase activity	1	0.02870	1
MF	GO:0004352	glutamate dehydrogenase (NAD+) activity	1	0.02870	1
MF	GO:0005488	binding	129	0.03251	1
MF	GO:0016638	oxidoreductase activity, acting on the CH-NH2 group of donors	2	0.04061	1
MF	GO:0004411	homogentisate 1,2-dioxygenase activity	1	0.04274	1
MF	GO:0008905	mannose-phosphate guanylyltransferase activity	1	0.04969	1
MF	GO:0004475	mannose-1-phosphate guanylyltransferase activity	1	0.04969	1
BP	GO:0000302	response to reactive oxygen species	13	6.5e-15	1
BP	GO:0008150	biological_process	48	5.5e-07	1
BP	GO:0000413	protein peptidyl-prolyl isomerization	7	1.6e-06	1
BP	GO:0000272	polysaccharide catabolic process	6	1.7e-06	1
BP	GO:0006457	protein folding	2	0.0066	1
BP	GO:0000103	sulfate assimilation	2	0.0170	1
BP	GO:0003006	developmental process involved in reproduction	2	0.0216	1
BP	GO:0000209	protein polyubiquitination	2	0.0224	1
BP	GO:0016567	protein ubiquitination	2	0.0250	1
BP	GO:0006790	sulfur compound metabolic process	2	0.0258	1
BP	GO:0032446	protein modification by small protein conjugation	2	0.0267	1
BP	GO:0050896	response to stimulus	20	0.0269	1
BP	GO:0000122	negative regulation of transcription by RNA polymerase II	2	0.0294	1
BP	GO:0006366	transcription by RNA polymerase II	2	0.0313	1
BP	GO:0006357	regulation of transcription by RNA polymerase II	2	0.0313	1
BP	GO:1903507	negative regulation of nucleic acid-templated transcription	2	0.0342	1
BP	GO:0051253	negative regulation of RNA metabolic process	2	0.0342	1
BP	GO:1902679	negative regulation of RNA biosynthetic process	2	0.0342	1
BP	GO:2000113	negative regulation of cellular macromolecule biosynthetic process	2	0.0342	1
BP	GO:0010558	negative regulation of macromolecule biosynthetic process	2	0.0342	1
BP	GO:0045892	negative regulation of transcription, DNA-templated	2	0.0342	1
BP	GO:0009890	negative regulation of biosynthetic process	2	0.0352	1
BP	GO:0045934	negative regulation of nucleobase-containing compound metabolic process	2	0.0352	1
BP	GO:0031327	negative regulation of cellular biosynthetic process	2	0.0352	1
BP	GO:0051172	negative regulation of nitrogen compound metabolic process	2	0.0382	1
BP	GO:0031324	negative regulation of cellular metabolic process	2	0.0402	1
BP	GO:0006950	response to stress	18	0.0411	1
BP	GO:1903506	regulation of nucleic acid-templated transcription	2	0.0467	1
BP	GO:0006355	regulation of transcription, DNA-templated	2	0.0467	1
BP	GO:2001141	regulation of RNA biosynthetic process	2	0.0478	1
BP	GO:0043605	cellular amide catabolic process	1	0.0489	1
BP	GO:0000255	allantoin metabolic process	1	0.0489	1
BP	GO:0000256	allantoin catabolic process	1	0.0489	1
CC	GO:0110165	cellular anatomical entity	118	7e-05	2
CC	GO:0005634	nucleus	47	0.00054	2
CC	GO:0000145	exocyst	4	0.00124	2
CC	GO:0005615	extracellular space	2	0.00444	2
CC	GO:0005783	endoplasmic reticulum	6	0.00621	2
CC	GO:0005575	cellular_component	121	0.01702	2
MF	GO:0003674	molecular_function	443	8.2e-09	2
MF	GO:0004672	protein kinase activity	63	6.7e-05	2
MF	GO:0005516	calmodulin binding	11	6.8e-05	2
MF	GO:0003677	DNA binding	64	0.00022	2
MF	GO:0000210	NAD+ diphosphatase activity	3	0.00124	2
MF	GO:0005548	phospholipid transporter activity	3	0.00173	2
MF	GO:0004722	protein serine/threonine phosphatase activity	8	0.00716	2
MF	GO:0000987	cis-regulatory region sequence-specific DNA binding	4	0.00920	2
MF	GO:0008194	UDP-glycosyltransferase activity	7	0.01536	2
MF	GO:0004611	phosphoenolpyruvate carboxykinase activity	2	0.01538	2
MF	GO:0004612	phosphoenolpyruvate carboxykinase (ATP) activity	2	0.01538	2
MF	GO:0004351	glutamate decarboxylase activity	2	0.02422	2
MF	GO:0016831	carboxy-lyase activity	4	0.02964	2
MF	GO:0001664	G protein-coupled receptor binding	2	0.03190	2
BP	GO:0001944	vasculature development	6	4.7e-09	2
BP	GO:0008150	biological_process	54	1.4e-07	2
BP	GO:0002237	response to molecule of bacterial origin	5	1.8e-05	2
BP	GO:0000302	response to reactive oxygen species	5	0.00043	2
BP	GO:0000289	nuclear-transcribed mRNA poly(A) tail shortening	2	0.00090	2
BP	GO:0006952	defense response	6	0.00124	2
BP	GO:0000165	MAPK cascade	3	0.00155	2
BP	GO:0000162	tryptophan biosynthetic process	3	0.00210	2
BP	GO:0007165	signal transduction	6	0.00885	2
BP	GO:0097305	response to alcohol	1	0.01528	2
BP	GO:0097306	cellular response to alcohol	1	0.01528	2
BP	GO:0071215	cellular response to abscisic acid stimulus	1	0.01528	2
BP	GO:0009737	response to abscisic acid	1	0.01528	2
BP	GO:0009738	abscisic acid-activated signaling pathway	1	0.01528	2
BP	GO:0071396	cellular response to lipid	1	0.02032	2
BP	GO:0033993	response to lipid	1	0.03033	2
BP	GO:0009880	embryonic pattern specification	1	0.03529	2
BP	GO:0000578	embryonic axis specification	1	0.03529	2
BP	GO:0000122	negative regulation of transcription by RNA polymerase II	2	0.03654	2
BP	GO:0006366	transcription by RNA polymerase II	2	0.03883	2
BP	GO:0006357	regulation of transcription by RNA polymerase II	2	0.03883	2
BP	GO:0009798	axis specification	1	0.04023	2
BP	GO:0010558	negative regulation of macromolecule biosynthetic process	2	0.04236	2
BP	GO:1902679	negative regulation of RNA biosynthetic process	2	0.04236	2
BP	GO:0045892	negative regulation of transcription, DNA-templated	2	0.04236	2
BP	GO:2000113	negative regulation of cellular macromolecule biosynthetic process	2	0.04236	2
BP	GO:0051253	negative regulation of RNA metabolic process	2	0.04236	2
BP	GO:1903507	negative regulation of nucleic acid-templated transcription	2	0.04236	2
BP	GO:0031327	negative regulation of cellular biosynthetic process	2	0.04357	2
BP	GO:0009890	negative regulation of biosynthetic process	2	0.04357	2
BP	GO:0045934	negative regulation of nucleobase-containing compound metabolic process	2	0.04357	2
BP	GO:0051172	negative regulation of nitrogen compound metabolic process	2	0.04726	2
BP	GO:0031324	negative regulation of cellular metabolic process	2	0.04978	2
CC	GO:0110165	cellular anatomical entity	53	0.00014	3
CC	GO:0005886	plasma membrane	8	0.00055	3
MF	GO:0003677	DNA binding	32	1.1e-05	3
MF	GO:0004325	ferrochelatase activity	2	0.00046	3
MF	GO:0004089	carbonate dehydratase activity	3	0.00152	3
MF	GO:0003674	molecular_function	163	0.00164	3
MF	GO:0004457	lactate dehydrogenase activity	2	0.00321	3
MF	GO:0003958	NADPH-hemoprotein reductase activity	2	0.00569	3
MF	GO:0004553	hydrolase activity, hydrolyzing O-glycosyl compounds	9	0.00654	3
MF	GO:0005488	binding	80	0.00991	3
MF	GO:0003951	NAD+ kinase activity	2	0.01121	3
MF	GO:0043167	ion binding	18	0.01232	3
MF	GO:0016649	oxidoreductase activity, acting on the CH-NH group of donors, quinone or similar compound as accepto...	1	0.01406	3
MF	GO:0004174	electron-transferring-flavoprotein dehydrogenase activity	1	0.01406	3
MF	GO:0004143	diacylglycerol kinase activity	1	0.01871	3
MF	GO:0003746	translation elongation factor activity	3	0.01887	3
MF	GO:0004601	peroxidase activity	4	0.02721	3
MF	GO:0016684	oxidoreductase activity, acting on peroxide as acceptor	4	0.02721	3
MF	GO:0046914	transition metal ion binding	7	0.02783	3
MF	GO:0046872	metal ion binding	11	0.03149	3
MF	GO:0043169	cation binding	11	0.03149	3
MF	GO:0004817	cysteine-tRNA ligase activity	1	0.03251	3
MF	GO:0005199	structural constituent of cell wall	1	0.03251	3
MF	GO:0004103	choline kinase activity	1	0.03707	3
MF	GO:0003883	CTP synthase activity	1	0.04612	3
MF	GO:0005515	protein binding	21	0.04783	3
BP	GO:0001666	response to hypoxia	4	2.0e-05	3
BP	GO:0005976	polysaccharide metabolic process	4	5.6e-05	3
BP	GO:0008150	biological_process	23	0.00039	3
BP	GO:0000162	tryptophan biosynthetic process	2	0.00523	3
BP	GO:0002237	response to molecule of bacterial origin	2	0.00844	3
BP	GO:0005982	starch metabolic process	1	0.01301	3
BP	GO:0000272	polysaccharide catabolic process	2	0.01358	3
BP	GO:0016052	carbohydrate catabolic process	2	0.01422	3
BP	GO:0002239	response to oomycetes	2	0.01867	3
BP	GO:0002229	defense response to oomycetes	2	0.01867	3
BP	GO:0006073	cellular glucan metabolic process	1	0.01946	3
BP	GO:0044042	glucan metabolic process	1	0.01946	3
BP	GO:0044264	cellular polysaccharide metabolic process	1	0.02373	3
BP	GO:0000271	polysaccharide biosynthetic process	1	0.02586	3
BP	GO:0016051	carbohydrate biosynthetic process	1	0.03223	3
BP	GO:0001709	cell fate determination	1	0.04275	3
CC	GO:0005576	extracellular region	118	< 1e-30	4
CC	GO:0110165	cellular anatomical entity	461	1.2e-17	4
CC	GO:0000786	nucleosome	19	3.1e-15	4
CC	GO:0005618	cell wall	11	2.0e-07	4
CC	GO:0005575	cellular_component	470	4.8e-06	4
CC	GO:0005615	extracellular space	4	0.00049	4
CC	GO:0000779	condensed chromosome, centromeric region	6	0.00060	4
CC	GO:0000347	THO complex	5	0.00097	4
CC	GO:0000793	condensed chromosome	11	0.00110	4
CC	GO:0045259	proton-transporting ATP synthase complex	4	0.03420	4
CC	GO:0005753	mitochondrial proton-transporting ATP synthase complex	4	0.03420	4
CC	GO:0045263	proton-transporting ATP synthase complex, coupling factor F(o)	2	0.03645	4
CC	GO:0000276	mitochondrial proton-transporting ATP synthase complex, coupling factor F(o)	2	0.03645	4
CC	GO:0000776	kinetochore	4	0.04212	4
MF	GO:0003777	microtubule motor activity	37	3.2e-25	4
MF	GO:0003674	molecular_function	938	5.8e-20	4
MF	GO:0004553	hydrolase activity, hydrolyzing O-glycosyl compounds	65	6.2e-15	4
MF	GO:0005507	copper ion binding	36	1.9e-13	4
MF	GO:0004064	arylesterase activity	5	1.7e-06	4
MF	GO:0004252	serine-type endopeptidase activity	18	7.9e-06	4
MF	GO:0003878	ATP citrate synthase activity	5	9.8e-06	4
MF	GO:0004601	peroxidase activity	19	3.4e-05	4
MF	GO:0004185	serine-type carboxypeptidase activity	13	7.6e-05	4
MF	GO:0004565	beta-galactosidase activity	8	0.00021	4
MF	GO:0004356	glutamate-ammonia ligase activity	5	0.00085	4
MF	GO:0004478	methionine adenosyltransferase activity	3	0.00100	4
MF	GO:0003849	3-deoxy-7-phosphoheptulonate synthase activity	4	0.00150	4
MF	GO:0005459	UDP-galactose transmembrane transporter activity	3	0.00364	4
MF	GO:0004352	glutamate dehydrogenase (NAD+) activity	2	0.00425	4
MF	GO:0004069	L-aspartate:2-oxoglutarate aminotransferase activity	5	0.00434	4
MF	GO:0005089	Rho guanyl-nucleotide exchange factor activity	4	0.00498	4
MF	GO:0003838	sterol 24-C-methyltransferase activity	2	0.00695	4
MF	GO:0005504	fatty acid binding	3	0.00708	4
MF	GO:0005515	protein binding	112	0.00808	4
MF	GO:0005516	calmodulin binding	12	0.00976	4
MF	GO:0004857	enzyme inhibitor activity	7	0.01124	4
MF	GO:0005506	iron ion binding	12	0.01127	4
MF	GO:0003999	adenine phosphoribosyltransferase activity	3	0.01391	4
MF	GO:0001872	(1->3)-beta-D-glucan binding	2	0.01408	4
MF	GO:0008905	mannose-phosphate guanylyltransferase activity	2	0.01408	4
MF	GO:0004475	mannose-1-phosphate guanylyltransferase activity	2	0.01408	4
MF	GO:0106130	purine phosphoribosyltransferase activity	3	0.01604	4
MF	GO:0005452	inorganic anion exchanger activity	3	0.01835	4
MF	GO:0030247	polysaccharide binding	2	0.01844	4
MF	GO:0008807	carboxyvinyl-carboxyphosphonate phosphorylmutase activity	1	0.02711	4
MF	GO:0004021	L-alanine:2-oxoglutarate aminotransferase activity	2	0.02859	4
MF	GO:0047635	alanine-oxo-acid transaminase activity	2	0.02859	4
MF	GO:0030246	carbohydrate binding	2	0.02859	4
MF	GO:0004506	squalene monooxygenase activity	3	0.02930	4
MF	GO:0004650	polygalacturonase activity	6	0.02947	4
MF	GO:0004190	aspartic-type endopeptidase activity	8	0.03106	4
MF	GO:0070001	aspartic-type peptidase activity	8	0.03106	4
MF	GO:0070568	guanylyltransferase activity	2	0.03432	4
MF	GO:0004421	hydroxymethylglutaryl-CoA synthase activity	2	0.03432	4
MF	GO:0003913	DNA photolyase activity	2	0.04046	4
MF	GO:0004467	long-chain fatty acid-CoA ligase activity	2	0.04046	4
MF	GO:0004419	hydroxymethylglutaryl-CoA lyase activity	2	0.04046	4
MF	GO:0016763	transferase activity, transferring pentosyl groups	4	0.04917	4
BP	GO:0008150	biological_process	158	1.9e-18	4
BP	GO:0000079	regulation of cyclin-dependent protein serine/threonine kinase activity	17	2.6e-14	4
BP	GO:0000914	phragmoplast assembly	4	2.4e-07	4
BP	GO:0000226	microtubule cytoskeleton organization	14	9.3e-07	4
BP	GO:0000132	establishment of mitotic spindle orientation	3	3.2e-05	4
BP	GO:0000910	cytokinesis	14	8.8e-05	4
BP	GO:0016042	lipid catabolic process	3	0.00011	4
BP	GO:0001666	response to hypoxia	7	0.00014	4
BP	GO:0009416	response to light stimulus	5	0.00059	4
BP	GO:0000413	protein peptidyl-prolyl isomerization	8	0.00066	4
BP	GO:0000038	very long-chain fatty acid metabolic process	5	0.00087	4
BP	GO:0000281	mitotic cytokinesis	6	0.00125	4
BP	GO:0000080	mitotic G1 phase	2	0.00216	4
BP	GO:0003333	amino acid transmembrane transport	6	0.00445	4
BP	GO:0000712	resolution of meiotic recombination intermediates	2	0.00445	4
BP	GO:0009409	response to cold	3	0.00530	4
BP	GO:0050896	response to stimulus	36	0.00817	4
BP	GO:0009653	anatomical structure morphogenesis	6	0.00960	4
BP	GO:0009269	response to desiccation	1	0.01498	4
BP	GO:0009987	cellular process	105	0.01507	4
BP	GO:0000902	cell morphogenesis	5	0.01574	4
BP	GO:0042221	response to chemical	10	0.01671	4
BP	GO:0042493	response to drug	2	0.01802	4
BP	GO:0015893	drug transport	2	0.01802	4
BP	GO:0006855	drug transmembrane transport	2	0.01802	4
BP	GO:0009414	response to water deprivation	2	0.02059	4
BP	GO:0009415	response to water	2	0.02059	4
BP	GO:0001101	response to acid chemical	2	0.02059	4
BP	GO:0071466	cellular response to xenobiotic stimulus	2	0.02616	4
BP	GO:0009410	response to xenobiotic stimulus	2	0.02616	4
BP	GO:0006805	xenobiotic metabolic process	2	0.02616	4
BP	GO:0098763	mitotic cell cycle phase	3	0.02937	4
BP	GO:0000087	mitotic M phase	1	0.02973	4
CC	GO:0110165	cellular anatomical entity	120	1.9e-06	5
CC	GO:0000148	1,3-beta-D-glucan synthase complex	5	6.1e-06	5
CC	GO:0005829	cytosol	8	0.0016	5
CC	GO:0099023	vesicle tethering complex	4	0.0027	5
CC	GO:0000776	kinetochore	3	0.0049	5
CC	GO:0000145	exocyst	3	0.0121	5
CC	GO:0005938	cell cortex	3	0.0126	5
CC	GO:0005622	intracellular	103	0.0137	5
CC	GO:0000243	commitment complex	2	0.0154	5
CC	GO:0005684	U2-type spliceosomal complex	2	0.0154	5
CC	GO:0005681	spliceosomal complex	2	0.0166	5
CC	GO:0005575	cellular_component	123	0.0170	5
CC	GO:0009507	chloroplast	11	0.0338	5
CC	GO:0009536	plastid	11	0.0435	5
MF	GO:0003674	molecular_function	327	2.0e-07	5
MF	GO:0004096	catalase activity	5	2.9e-07	5
MF	GO:0003677	DNA binding	59	1.4e-05	5
MF	GO:0000976	transcription regulatory region sequence-specific DNA binding	11	6.1e-05	5
MF	GO:0000156	phosphorelay response regulator activity	5	0.00026	5
MF	GO:0003825	alpha,alpha-trehalose-phosphate synthase (UDP-forming) activity	2	0.00240	5
MF	GO:0004722	protein serine/threonine phosphatase activity	7	0.00477	5
MF	GO:0005215	transporter activity	28	0.00863	5
MF	GO:0005524	ATP binding	15	0.00933	5
MF	GO:0035251	UDP-glucosyltransferase activity	5	0.00982	5
MF	GO:0005216	ion channel activity	7	0.01088	5
MF	GO:0003700	DNA-binding transcription factor activity	15	0.01260	5
MF	GO:0015267	channel activity	7	0.01591	5
MF	GO:0022803	passive transmembrane transporter activity	7	0.01591	5
MF	GO:0015318	inorganic molecular entity transmembrane transporter activity	16	0.02107	5
MF	GO:0015276	ligand-gated ion channel activity	3	0.02188	5
MF	GO:0022834	ligand-gated channel activity	3	0.02188	5
MF	GO:0003844	1,4-alpha-glucan branching enzyme activity	2	0.02314	5
MF	GO:0140110	transcription regulator activity	15	0.03053	5
MF	GO:0004668	protein-arginine deiminase activity	1	0.03727	5
MF	GO:0016813	hydrolase activity, acting on carbon-nitrogen (but not peptide) bonds, in linear amidines	1	0.03727	5
MF	GO:0015075	ion transmembrane transporter activity	15	0.03895	5
MF	GO:0000977	RNA polymerase II transcription regulatory region sequence-specific DNA binding	5	0.03977	5
MF	GO:0004373	glycogen (starch) synthase activity	2	0.04095	5
MF	GO:0003682	chromatin binding	3	0.04287	5
MF	GO:0022857	transmembrane transporter activity	17	0.04710	5
MF	GO:0005506	iron ion binding	5	0.04741	5
MF	GO:0004712	protein serine/threonine/tyrosine kinase activity	2	0.04773	5
BP	GO:0008150	biological_process	36	2.3e-08	5
BP	GO:0000719	photoreactive repair	2	0.0010	5
BP	GO:0006805	xenobiotic metabolic process	2	0.0015	5
BP	GO:0001708	cell fate specification	2	0.0019	5
BP	GO:0002229	defense response to oomycetes	3	0.0043	5
BP	GO:0000103	sulfate assimilation	2	0.0098	5
BP	GO:0000209	protein polyubiquitination	2	0.0130	5
BP	GO:0006817	phosphate ion transport	1	0.0136	5
BP	GO:0016567	protein ubiquitination	2	0.0145	5
BP	GO:0032446	protein modification by small protein conjugation	2	0.0155	5
BP	GO:0015698	inorganic anion transport	1	0.0236	5
BP	GO:0036293	response to decreased oxygen levels	2	0.0276	5
BP	GO:0070482	response to oxygen levels	2	0.0276	5
BP	GO:0001666	response to hypoxia	2	0.0276	5
BP	GO:0006950	response to stress	10	0.0281	5
BP	GO:0000272	polysaccharide catabolic process	2	0.0317	5
BP	GO:0016052	carbohydrate catabolic process	2	0.0331	5
BP	GO:0050896	response to stimulus	13	0.0334	5
BP	GO:0000055	ribosomal large subunit export from nucleus	1	0.0435	5
BP	GO:0002213	defense response to insect	1	0.0435	5
BP	GO:0005976	polysaccharide metabolic process	2	0.0447	5
BP	GO:0070647	protein modification by small protein conjugation or removal	2	0.0471	5

## Sheet: S36
Table S36. Summary of the KEGG annotation of S. curtisii transcriptome
The Appendix shows each KEGG pathway and ID and the number of members identified in the transcriptome.
KEGG Pathway	No. of KEGG members belong to the pathway
Metabolism
Global and overview maps
01100 Metabolic pathways	1062
01110 Biosynthesis of secondary metabolites	508
01120 Microbial metabolism in diverse environments	196
01200 Carbon metabolism	111
01210 2-Oxocarboxylic acid metabolism	32
01212 Fatty acid metabolism	37
01230 Biosynthesis of amino acids	115
01240 Biosynthesis of cofactors	143
01220 Degradation of aromatic compounds	10
Carbohydrate metabolism
00010 Glycolysis / Gluconeogenesis	36
00020 Citrate cycle (TCA cycle)	23
00030 Pentose phosphate pathway	23
00040 Pentose and glucuronate interconversions	23
00051 Fructose and mannose metabolism	25
00052 Galactose metabolism	19
00053 Ascorbate and aldarate metabolism	20
00500 Starch and sucrose metabolism	38
00520 Amino sugar and nucleotide sugar metabolism	42
00620 Pyruvate metabolism	46
00630 Glyoxylate and dicarboxylate metabolism	37
00640 Propanoate metabolism	30
00650 Butanoate metabolism	22
00660 C5-Branched dibasic acid metabolism	6
00562 Inositol phosphate metabolism	28
Energy metabolism
00190 Oxidative phosphorylation	84
00195 Photosynthesis	27
00196 Photosynthesis - antenna proteins	11
00710 Carbon fixation in photosynthetic organisms	28
00720 Carbon fixation pathways in prokaryotes	16
00680 Methane metabolism	22
00910 Nitrogen metabolism	15
00920 Sulfur metabolism	19
Lipid metabolism
00061 Fatty acid biosynthesis	20
00062 Fatty acid elongation	10
00071 Fatty acid degradation	23
00072 Synthesis and degradation of ketone bodies	4
00073 Cutin, suberine and wax biosynthesis	11
00100 Steroid biosynthesis	22
00120 Primary bile acid biosynthesis	2
00140 Steroid hormone biosynthesis	4
00561 Glycerolipid metabolism	36
00564 Glycerophospholipid metabolism	49
00565 Ether lipid metabolism	9
00600 Sphingolipid metabolism	15
00590 Arachidonic acid metabolism	9
00591 Linoleic acid metabolism	4
00592 alpha-Linolenic acid metabolism	16
01040 Biosynthesis of unsaturated fatty acids	11
Nucleotide metabolism
00230 Purine metabolism	53
00240 Pyrimidine metabolism	35
Amino acid metabolism
00250 Alanine, aspartate and glutamate metabolism	33
00260 Glycine, serine and threonine metabolism	39
00270 Cysteine and methionine metabolism	49
00280 Valine, leucine and isoleucine degradation	33
00290 Valine, leucine and isoleucine biosynthesis	10
00300 Lysine biosynthesis	13
00310 Lysine degradation	22
00220 Arginine biosynthesis	21
00330 Arginine and proline metabolism	29
00340 Histidine metabolism	13
00350 Tyrosine metabolism	23
00360 Phenylalanine metabolism	16
00380 Tryptophan metabolism	28
00400 Phenylalanine, tyrosine and tryptophan biosynthesis	29
Metabolism of other amino acids
00410 beta-Alanine metabolism	22
00430 Taurine and hypotaurine metabolism	3
00440 Phosphonate and phosphinate metabolism	3
00450 Selenocompound metabolism	11
00460 Cyanoamino acid metabolism	13
00471 D-Glutamine and D-glutamate metabolism	1
00480 Glutathione metabolism	28
Glycan biosynthesis and metabolism
00510 N-Glycan biosynthesis	32
00513 Various types of N-glycan biosynthesis	25
00515 Mannose type O-glycan biosynthesis	1
00514 Other types of O-glycan biosynthesis	8
00531 Glycosaminoglycan degradation	5
00563 Glycosylphosphatidylinositol (GPI)-anchor biosynthesis	20
00601 Glycosphingolipid biosynthesis - lacto and neolacto series	1
00603 Glycosphingolipid biosynthesis - globo and isoglobo series	3
00604 Glycosphingolipid biosynthesis - ganglio series	2
00540 Lipopolysaccharide biosynthesis	7
00541 O-Antigen nucleotide sugar biosynthesis	6
00550 Peptidoglycan biosynthesis	2
00511 Other glycan degradation	9
Metabolism of cofactors and vitamins
00730 Thiamine metabolism	13
00740 Riboflavin metabolism	13
00750 Vitamin B6 metabolism	8
00760 Nicotinate and nicotinamide metabolism	19
00770 Pantothenate and CoA biosynthesis	20
00780 Biotin metabolism	8
00785 Lipoic acid metabolism	1
00790 Folate biosynthesis	20
00670 One carbon pool by folate	13
00830 Retinol metabolism	6
00860 Porphyrin and chlorophyll metabolism	35
00130 Ubiquinone and other terpenoid-quinone biosynthesis	23
Metabolism of terpenoids and polyketides
00900 Terpenoid backbone biosynthesis	33
00902 Monoterpenoid biosynthesis	1
00909 Sesquiterpenoid and triterpenoid biosynthesis	8
00904 Diterpenoid biosynthesis	7
00906 Carotenoid biosynthesis	20
00905 Brassinosteroid biosynthesis	9
00981 Insect hormone biosynthesis	1
00908 Zeatin biosynthesis	6
00903 Limonene and pinene degradation	2
00281 Geraniol degradation	4
01051 Biosynthesis of ansamycins	1
00523 Polyketide sugar unit biosynthesis	1
01053 Biosynthesis of siderophore group nonribosomal peptides	1
Biosynthesis of other secondary metabolites
00940 Phenylpropanoid biosynthesis	22
00945 Stilbenoid, diarylheptanoid and gingerol biosynthesis	4
00941 Flavonoid biosynthesis	15
00944 Flavone and flavonol biosynthesis	3
00942 Anthocyanin biosynthesis	1
00943 Isoflavonoid biosynthesis	2
00901 Indole alkaloid biosynthesis	1
00950 Isoquinoline alkaloid biosynthesis	10
00960 Tropane, piperidine and pyridine alkaloid biosynthesis	8
00232 Caffeine metabolism	2
00965 Betalain biosynthesis	4
00966 Glucosinolate biosynthesis	3
00332 Carbapenem biosynthesis	1
00261 Monobactam biosynthesis	7
00521 Streptomycin biosynthesis	5
00524 Neomycin, kanamycin and gentamicin biosynthesis	1
00401 Novobiocin biosynthesis	2
00405 Phenazine biosynthesis	2
00333 Prodigiosin biosynthesis	3
00254 Aflatoxin biosynthesis	1
00998 Biosynthesis of various secondary metabolites - part 2	1
Xenobiotics biodegradation and metabolism
00362 Benzoate degradation	8
00627 Aminobenzoate degradation	7
00364 Fluorobenzoate degradation	2
00625 Chloroalkane and chloroalkene degradation	6
00361 Chlorocyclohexane and chlorobenzene degradation	3
00623 Toluene degradation	2
00643 Styrene degradation	5
00791 Atrazine degradation	2
00930 Caprolactam degradation	6
00621 Dioxin degradation	1
00626 Naphthalene degradation	4
00624 Polycyclic aromatic hydrocarbon degradation	1
00980 Metabolism of xenobiotics by cytochrome P450	10
00982 Drug metabolism - cytochrome P450	7
00983 Drug metabolism - other enzymes	20
Genetic Information Processing
Transcription
03020 RNA polymerase	29
03022 Basal transcription factors	27
03040 Spliceosome	99
Translation
03010 Ribosome	124
00970 Aminoacyl-tRNA biosynthesis	26
03013 RNA transport	99
03015 mRNA surveillance pathway	54
03008 Ribosome biogenesis in eukaryotes	56
Folding, sorting and degradation
03060 Protein export	24
04141 Protein processing in endoplasmic reticulum	77
04130 SNARE interactions in vesicular transport	18
04120 Ubiquitin mediated proteolysis	62
04122 Sulfur relay system	11
03050 Proteasome	35
03018 RNA degradation	46
Replication and repair
03030 DNA replication	32
03410 Base excision repair	24
03420 Nucleotide excision repair	34
03430 Mismatch repair	20
03440 Homologous recombination	32
03450 Non-homologous end-joining	8
03460 Fanconi anemia pathway	27
Environmental Information Processing
Membrane transport
02010 ABC transporters	11
03070 Bacterial secretion system	6
Signal transduction
02020 Two-component system	15
04010 MAPK signaling pathway	17
04013 MAPK signaling pathway - fly	12
04016 MAPK signaling pathway - plant	38
04011 MAPK signaling pathway - yeast	36
04012 ErbB signaling pathway	7
04014 Ras signaling pathway	16
04015 Rap1 signaling pathway	11
04310 Wnt signaling pathway	18
04330 Notch signaling pathway	9
04340 Hedgehog signaling pathway	7
04341 Hedgehog signaling pathway - fly	10
04350 TGF-beta signaling pathway	11
04390 Hippo signaling pathway	9
04391 Hippo signaling pathway - fly	7
04392 Hippo signaling pathway - multiple species	4
04370 VEGF signaling pathway	8
04371 Apelin signaling pathway	18
04630 JAK-STAT signaling pathway	3
04064 NF-kappa B signaling pathway	6
04668 TNF signaling pathway	5
04066 HIF-1 signaling pathway	20
04068 FoxO signaling pathway	21
04020 Calcium signaling pathway	10
04070 Phosphatidylinositol signaling system	21
04072 Phospholipase D signaling pathway	14
04071 Sphingolipid signaling pathway	22
04024 cAMP signaling pathway	15
04022 cGMP-PKG signaling pathway	10
04151 PI3K-Akt signaling pathway	30
04152 AMPK signaling pathway	27
04150 mTOR signaling pathway	34
04075 Plant hormone signal transduction	40
Signaling molecules and interaction
04080 Neuroactive ligand-receptor interaction	1
Cellular Processes
Transport and catabolism
04144 Endocytosis	61
04145 Phagosome	28
04142 Lysosome	39
04146 Peroxisome	46
04140 Autophagy - animal	44
04138 Autophagy - yeast	58
04136 Autophagy - other	23
04137 Mitophagy - animal	19
04139 Mitophagy - yeast	21
Cell growth and death
04110 Cell cycle	54
04111 Cell cycle - yeast	58
04112 Cell cycle - Caulobacter	5
04113 Meiosis - yeast	45
04114 Oocyte meiosis	33
04210 Apoptosis	15
04214 Apoptosis - fly	14
04215 Apoptosis - multiple species	3
04216 Ferroptosis	10
04217 Necroptosis	21
04115 p53 signaling pathway	12
04218 Cellular senescence	30
Cellular community - eukaryotes
04510 Focal adhesion	12
04520 Adherens junction	9
04530 Tight junction	23
04540 Gap junction	7
04550 Signaling pathways regulating pluripotency of stem cells	7
Cellular community - prokaryotes
02024 Quorum sensing	12
05111 Biofilm formation - Vibrio cholerae	1
02025 Biofilm formation - Pseudomonas aeruginosa	2
02026 Biofilm formation - Escherichia coli	3
Cell motility
02040 Flagellar assembly	1
04810 Regulation of actin cytoskeleton	23
Organismal Systems
Immune system
04611 Platelet activation	7
04613 Neutrophil extracellular trap formation	17
04620 Toll-like receptor signaling pathway	5
04624 Toll and Imd signaling pathway	5
04621 NOD-like receptor signaling pathway	17
04622 RIG-I-like receptor signaling pathway	7
04623 Cytosolic DNA-sensing pathway	15
04625 C-type lectin receptor signaling pathway	7
04650 Natural killer cell mediated cytotoxicity	6
04612 Antigen processing and presentation	12
04660 T cell receptor signaling pathway	10
04658 Th1 and Th2 cell differentiation	3
04659 Th17 cell differentiation	5
04657 IL-17 signaling pathway	7
04662 B cell receptor signaling pathway	6
04664 Fc epsilon RI signaling pathway	6
04666 Fc gamma R-mediated phagocytosis	18
04670 Leukocyte transendothelial migration	6
04062 Chemokine signaling pathway	12
Endocrine system
04911 Insulin secretion	2
04910 Insulin signaling pathway	25
04922 Glucagon signaling pathway	20
04923 Regulation of lipolysis in adipocytes	4
04920 Adipocytokine signaling pathway	6
03320 PPAR signaling pathway	12
04929 GnRH secretion	3
04912 GnRH signaling pathway	9
04913 Ovarian steroidogenesis	2
04915 Estrogen signaling pathway	11
04914 Progesterone-mediated oocyte maturation	24
04917 Prolactin signaling pathway	6
04921 Oxytocin signaling pathway	14
04926 Relaxin signaling pathway	7
04935 Growth hormone synthesis, secretion and action	9
04918 Thyroid hormone synthesis	6
04919 Thyroid hormone signaling pathway	20
04928 Parathyroid hormone synthesis, secretion and action	7
04916 Melanogenesis	9
04924 Renin secretion	5
04614 Renin-angiotensin system	4
04925 Aldosterone synthesis and secretion	3
04927 Cortisol synthesis and secretion	1
Circulatory system
04260 Cardiac muscle contraction	18
04261 Adrenergic signaling in cardiomyocytes	14
04270 Vascular smooth muscle contraction	7
Digestive system
04970 Salivary secretion	4
04971 Gastric acid secretion	3
04972 Pancreatic secretion	8
04976 Bile secretion	7
04973 Carbohydrate digestion and absorption	3
04974 Protein digestion and absorption	4
04975 Fat digestion and absorption	5
04979 Cholesterol metabolism	5
04977 Vitamin digestion and absorption	3
04978 Mineral absorption	7
Excretory system
04962 Vasopressin-regulated water reabsorption	7
04960 Aldosterone-regulated sodium reabsorption	3
04961 Endocrine and other factor-regulated calcium reabsorption	7
04964 Proximal tubule bicarbonate reclamation	3
04966 Collecting duct acid secretion	10
Nervous system
04724 Glutamatergic synapse	8
04727 GABAergic synapse	11
04725 Cholinergic synapse	6
04728 Dopaminergic synapse	14
04726 Serotonergic synapse	7
04720 Long-term potentiation	9
04730 Long-term depression	6
04723 Retrograde endocannabinoid signaling	34
04721 Synaptic vesicle cycle	23
04722 Neurotrophin signaling pathway	15
Sensory system
04744 Phototransduction	2
04745 Phototransduction - fly	1
04740 Olfactory transduction	3
04742 Taste transduction	2
04750 Inflammatory mediator regulation of TRP channels	4
Development and regeneration
04320 Dorso-ventral axis formation	3
04360 Axon guidance	11
04361 Axon regeneration	15
04380 Osteoclast differentiation	7
Aging
04211 Longevity regulating pathway	17
04212 Longevity regulating pathway - worm	20
04213 Longevity regulating pathway - multiple species	17
Environmental adaptation
04710 Circadian rhythm	9
04713 Circadian entrainment	5
04711 Circadian rhythm - fly	3
04712 Circadian rhythm - plant	21
04714 Thermogenesis	89
04626 Plant-pathogen interaction	34
Human Diseases
Cancer: overview
05200 Pathways in cancer	43
05202 Transcriptional misregulation in cancer	12
05206 MicroRNAs in cancer	19
05205 Proteoglycans in cancer	17
05204 Chemical carcinogenesis - DNA adducts	5
05207 Chemical carcinogenesis - receptor activation	14
05208 Chemical carcinogenesis - reactive oxygen species	75
05203 Viral carcinogenesis	41
05230 Central carbon metabolism in cancer	15
05231 Choline metabolism in cancer	16
05235 PD-L1 expression and PD-1 checkpoint pathway in cancer	11
Cancer: specific types
05210 Colorectal cancer	15
05212 Pancreatic cancer	13
05225 Hepatocellular carcinoma	17
05226 Gastric cancer	13
05214 Glioma	10
05216 Thyroid cancer	6
05221 Acute myeloid leukemia	6
05220 Chronic myeloid leukemia	7
05217 Basal cell carcinoma	3
05218 Melanoma	7
05211 Renal cell carcinoma	12
05219 Bladder cancer	5
05215 Prostate cancer	12
05213 Endometrial cancer	9
05224 Breast cancer	11
05222 Small cell lung cancer	8
05223 Non-small cell lung cancer	7
Infectious disease: viral
05166 Human T-cell leukemia virus 1 infection	43
05170 Human immunodeficiency virus 1 infection	31
05161 Hepatitis B	13
05160 Hepatitis C	15
05171 Coronavirus disease - COVID-19	77
05164 Influenza A	17
05162 Measles	11
05168 Herpes simplex virus 1 infection	17
05163 Human cytomegalovirus infection	18
05167 Kaposi sarcoma-associated herpesvirus infection	19
05169 Epstein-Barr virus infection	35
05165 Human papillomavirus infection	44
Infectious disease: bacterial
05110 Vibrio cholerae infection	18
05120 Epithelial cell signaling in Helicobacter pylori infection	16
05130 Pathogenic Escherichia coli infection	29
05132 Salmonella infection	45
05131 Shigellosis	48
05135 Yersinia infection	16
05133 Pertussis	6
05134 Legionellosis	11
05152 Tuberculosis	23
05100 Bacterial invasion of epithelial cells	15
Infectious disease: parasitic
05146 Amoebiasis	5
05145 Toxoplasmosis	7
05140 Leishmaniasis	4
05142 Chagas disease	8
05143 African trypanosomiasis	4
Immune disease
05322 Systemic lupus erythematosus	8
05323 Rheumatoid arthritis	13
05340 Primary immunodeficiency	2
Neurodegenerative disease
05010 Alzheimer disease	123
05012 Parkinson disease	108
05014 Amyotrophic lateral sclerosis	147
05016 Huntington disease	125
05017 Spinocerebellar ataxia	57
05020 Prion disease	105
05022 Pathways of neurodegeneration - multiple diseases	143
Substance dependence
05030 Cocaine addiction	3
05031 Amphetamine addiction	6
05032 Morphine addiction	4
05033 Nicotine addiction	1
05034 Alcoholism	19
Cardiovascular disease
05417 Lipid and atherosclerosis	24
05418 Fluid shear stress and atherosclerosis	13
05410 Hypertrophic cardiomyopathy	6
05412 Arrhythmogenic right ventricular cardiomyopathy	1
05414 Dilated cardiomyopathy	4
05415 Diabetic cardiomyopathy	76
05416 Viral myocarditis	3
Endocrine and metabolic disease
04930 Type II diabetes mellitus	4
04940 Type I diabetes mellitus	2
04932 Non-alcoholic fatty liver disease	52
04931 Insulin resistance	14
04933 AGE-RAGE signaling pathway in diabetic complications	7
04934 Cushing syndrome	11
Drug resistance: antimicrobial
01502 Vancomycin resistance	2
01503 Cationic antimicrobial peptide (CAMP) resistance	1
Drug resistance: antineoplastic
01521 EGFR tyrosine kinase inhibitor resistance	9
01524 Platinum drug resistance	16
01523 Antifolate resistance	9
01522 Endocrine resistance	9

## Sheet: S37
Table S37. Enriched KEGG pathways in leaf and bud DEUs of S. curtisii
FDR < 0.05
Term	KEGG ID	Corrected P-Value	Tissue
Biosynthesis of secondary metabolites	ath01110	0.00986408	Leaf
Plant hormone signal transduction	ath04075	0.02258	Bud
Biosynthesis of secondary metabolites	ath01110	0.02258	Bud
Photosynthesis - antenna proteins	ath00196	0.0486111	Bud

## Sheet: S38
Table S38. Enriched KEGG pathways in DEU clusters of S. curtisii leaf
FDR < 0.05
Term	KEGG ID	Corrected P-Value	Cluster
Biosynthesis of secondary metabolites	ath01110	6.67493e-05	2
Flavonoid biosynthesis	ath00941	0.000726185	2
Phenylpropanoid biosynthesis	ath00940	0.0330912	2
Metabolic pathways	ath01100	0.0330912	2
Glyoxylate and dicarboxylate metabolism	ath00630	0.0146385	4
Carbon metabolism	ath01200	0.0146385	4
Biosynthesis of secondary metabolites	ath01110	0.0356929	6
Fatty acid elongation	ath00062	0.0356929	6

## Sheet: S39
Table S39. Enriched KEGG pathways in DEU clusters of S. curtisii bud
FDR < 0.05
Term	KEGG ID	Corrected P-Value	Cluster
MAPK signaling pathway - plant	ath04016	0.0110942	2
Plant hormone signal transduction	ath04075	0.035987	2
Metabolic pathways	ath01100	2.24161e-05	4
Biosynthesis of secondary metabolites	ath01110	2.24161e-05	4
Photosynthesis - antenna proteins	ath00196	0.000275428	4
Fatty acid elongation	ath00062	0.04658	4
Plant hormone signal transduction	ath04075	0.0141098	5
